# Supplementary material for: Strategies for oxidative synthesis of N-triflyl sulfoximines
Source: Royal Society of Chemistry journal article supplement (doi:10.1039/d4ra04992f), 2024-01-01

# Electronic Supporting Information (ESI)

## Strategies for oxidative synthesis of N-triflyl sulfoximines

Žan Testen and Marjan Jereb\*

University of Ljubljana, Faculty of Chemistry and Chemical Technology, Večna pot 113, 1000  
Ljubljana, Slovenia

## Table of contents

### Contents

|                                                                                         |    |
|-----------------------------------------------------------------------------------------|----|
| General Information.....                                                                | 3  |
| Preparation of N-trifluoromethylthio sulfoximines .....                                 | 4  |
| Characterization of unknown <i>N</i> -trifluoromethylthio sulfoximines <b>2</b> .....   | 4  |
| Preparation of <i>N</i> -triflyl sulfoximines <b>3</b> .....                            | 4  |
| General procedure 1 (GP1).....                                                          | 4  |
| General procedure 2 (GP2).....                                                          | 4  |
| General procedure 3 (GP3).....                                                          | 5  |
| Characterization of synthesized <i>N</i> -triflyl sulfoximines <b>3</b> .....           | 5  |
| References:.....                                                                        | 14 |
| Post-modification reactions .....                                                       | 15 |
| Post-modification reaction procedures.....                                              | 15 |
| Characterization of post-modification products .....                                    | 16 |
| Copies of <sup>1</sup> H NMR, <sup>19</sup> F NMR and <sup>13</sup> C NMR spectra ..... | 19 |

## General Information

Chemicals and solvents were obtained from commercial sources. TLC was performed on Merck-60-F254 plates using mixtures of petroleum ether (PE), hexane, dichloromethane (DCM), diethyl ether, ethyl acetate, and methanol. For flash chromatography, silica gel (63–200 $\mu$ m, 70–230 mesh ASTM; Fluka) was used. Products were characterized by  $^1\text{H}$ ,  $^{13}\text{C}$ , and  $^{19}\text{F}$  NMR spectroscopy, IR spectroscopy, HRMS, and melting points of solids. All NMR spectra were recorded in either  $\text{CDCl}_3$  using  $\text{Me}_4\text{Si}$  as an internal standard or in  $\text{DMSO}-d_6$ . Chemical shifts are reported in  $\delta$  (ppm) values relative to  $\delta = 0$  ppm ( $\text{Me}_4\text{Si}$ ) or 2.50 ppm (DMSO) for  $^1\text{H}$  NMR, and to the central line of  $\text{CDCl}_3$  ( $\delta = 77.16$  ppm) for  $^{13}\text{C}$  NMR.  $^{19}\text{F}$  spectra were referenced to  $\text{CFCl}_3$  as an external standard at  $\delta = 0.00$  ppm.  $^1\text{H}$ ,  $^{13}\text{C}$ , and  $^{19}\text{F}$  NMR spectra were recorded with a Bruker Avance III 500 instrument at 500, 126, and 471 MHz, respectively. IR spectra were recorded with a Bruker FTIR Alpha Platinum spectrophotometer. LC-HRMS analyses were performed on a Shimadzu LCMS-IT-TOF system (Kyoto, Japan), composed of a liquid chromatograph Nexera XR hyphenated to a mass spectrometer with an ion trap and time-of-flight tube equipped with an electrospray ionization (ESI) source. The melting points were determined with an OptiMelt MPA100.

## Preparation of N-trifluoromethylthio sulfoximines

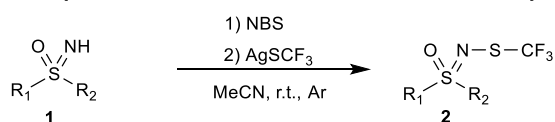

Prepared according to a known procedure.<sup>1</sup> A dried flask was charged with sulfoximine **1** and equipped with a septum and argon balloon. Dry MeCN (0.1 M) and *N*-bromosuccinimide (NBS) (1.0 equiv.) were added and the reaction mixture was stirred for 30 min. In another dried flask a solution of AgSCF<sub>3</sub> (0.1 M) was prepared and slowly transferred to the *in-situ* formed *N*-bromo sulfoximine using a syringe. After complete consumption of the reactant (checked with TLC, DCM) the solvent was removed using reduced pressure and the residue was purified using flash chromatography (DCM).

### Characterization of unknown *N*-trifluoromethylthio sulfoximines **2**

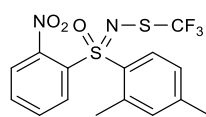

*N*-trifluoromethylthio-*S*-(2,4-dimethylphenyl)-*S*-(2-nitrophenyl) sulfoximine (**2ab**).

Orange solid (84%). <sup>1</sup>H NMR (500 MHz, Chloroform-*d*) δ 8.27 – 8.19 (m, 1H), 7.85 (d, *J* = 8.3 Hz, 1H), 7.83 – 7.75 (m, 3H), 7.22 – 7.16 (m, 1H), 7.12 (s, 1H), 2.43 (s, 3H), 2.39 (s, 3H). <sup>19</sup>F NMR (471 MHz, Chloroform-*d*) δ –50.75. <sup>13</sup>C NMR (126 MHz, Chloroform-*d*) δ 149.30, 145.57, 138.25, 134.99, 134.01, 133.20, 132.46, 132.14, 132.01, 130.63, 130.3 (C-F, <sup>1</sup>*J*<sub>C-F</sub> = 312.6 Hz), 127.27, 125.49, 21.51, 20.35. IR (neat): ν 3094, 2959, 2927, 2860, 1601, 1541, 1440, 1362, 1283, 1228, 1105, 1053, 963, 881, 850, 818, 780, 731, 661, 639, 622 (cm<sup>-1</sup>). HRMS (ESI-TOF) *m/z*: [M + H]<sup>+</sup> Calcd for C<sub>15</sub>H<sub>14</sub>F<sub>3</sub>N<sub>2</sub>O<sub>3</sub>S<sub>2</sub> 391.0392; Found 391.0389. Mp = 56.7 – 58.6 °C.

## Preparation of *N*-triflyl sulfoximines **3**

### General procedure 1 (GP1)

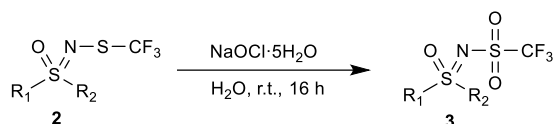

A flask was charged with *N*-trifluoromethylthio sulfoximine **2a–2j** (0.3 mmol), water (1 mL), NaOCl·5H<sub>2</sub>O (2.5 equiv.) and the reaction mixture was stirred at r.t. for 16 h. The reaction mixture was then extracted twice with EtOAc and the organic phase was dried under anhydrous Na<sub>2</sub>SO<sub>4</sub>. Evaporation of the solvent under reduced pressure yielded the product **3a–3j**.

### General procedure 2 (GP2)

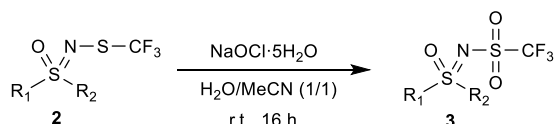

A flask was charged with *N*-trifluoromethylthio sulfoximine **2k–2u** (0.3 mmol), water (0.5 mL), MeCN (0.5 mL), NaOCl·5H<sub>2</sub>O (2.5 equiv.) and the reaction mixture was stirred at r.t. for 16 h. The reaction mixture was then extracted twice with EtOAc and the organic phase was dried under anhydrous Na<sub>2</sub>SO<sub>4</sub>. Evaporation of the solvent under reduced pressure yielded the product **3k–3u**.

### General procedure 3 (GP3)

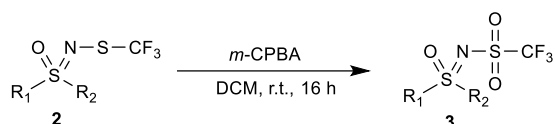

A flask was charged with *N*-trifluoromethylthio sulfoximine **2v–2ag** (0.3 mmol), DCM (1 mL), *m*-CPBA (2.5 equiv.) and the reaction mixture was stirred at r.t. for 16 h. Saturated NaHCO<sub>3</sub> solution was added to the reaction mixture and stirred until the organic phase became transparent. The product was extracted twice with DCM and the organic phase was dried under anhydrous Na<sub>2</sub>SO<sub>4</sub>. Evaporation of the solvent under reduced pressure yielded the product **3v–3ag**.

### Characterization of synthesized *N*-triflyl sulfoximines 3

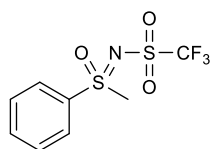

*N*-(triflyl)-*S*-phenyl-*S*-methyl sulfoximine (**3a**).<sup>2</sup> **2a** (0.3 mmol; 77 mg), 1 mL H<sub>2</sub>O, 2.5 equiv. of NaOCl·5H<sub>2</sub>O (0.75 mmol, 123 mg), GP1: White solid (60 mg, 73%). Flash chromatography (DCM) for purification. <sup>1</sup>H NMR (500 MHz, Chloroform-*d*) δ 8.13 – 7.98 (m, 3H), 7.80 (td, *J* = 7.4, 1.4 Hz, 2H), 7.73 – 7.60 (m, 3H), 3.52 (s, 3H). <sup>19</sup>F NMR (471 MHz, Chloroform-*d*) δ –79.24. <sup>13</sup>C NMR (126 MHz, Chloroform-*d*) δ 137.26, 135.53, 130.30, 127.43, 119.33, (C-F, <sup>1</sup>*J*<sub>C-F</sub> = 321.0 Hz), 46.86. IR (neat): ν 3020, 2925, 1582, 1452, 1409, 1354, 1341, 1319, 1254, 1196, 1175, 1134, 1093, 1049, 989, 974, 851, 795, 739, 686, 679, 619 (cm<sup>-1</sup>). HRMS (ESI-TOF) *m/z*: [M + H]<sup>+</sup> Calcd for C<sub>8</sub>H<sub>9</sub>F<sub>3</sub>NO<sub>3</sub>S<sub>2</sub> 287.997; Found 287.9965. Mp = 77.5 – 80.1 °C.

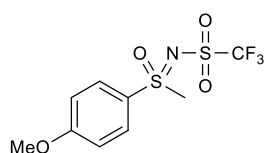

*N*-(triflyl)-*S*-(4-methoxyphenyl)-*S*-methyl sulfoximine (**3b**). **2b** (0.3 mmol; 86 mg), 1 mL H<sub>2</sub>O, 2.5 equiv. of NaOCl·5H<sub>2</sub>O (0.75 mmol, 123 mg), GP1: White semi solid (90%). Flash chromatography (DCM) for purification. <sup>1</sup>H NMR (500 MHz, Chloroform-*d*) δ 7.99 – 7.92 (m, 2H), 7.15 – 7.09 (m, 2H), 3.93 (s, 3H), 3.49 (s, 3H). <sup>19</sup>F NMR (471 MHz, Chloroform-*d*) δ –79.28. <sup>13</sup>C NMR (126 MHz, Chloroform-*d*) δ 165.23, 129.85, 127.94, 119.35 (C-F, <sup>1</sup>*J*<sub>C-F</sub> = 320.9 Hz), 115.52, 56.15, 47.44. IR (neat): ν 3034, 2935, 1591, 1496, 1443, 1347, 1324, 1259, 1219, 1174, 1135, 1092, 1038, 1021, 982, 961, 834, 804, 767, 739, 622 (cm<sup>-1</sup>). HRMS (ESI-TOF) *m/z*: [M + H]<sup>+</sup> Calcd for C<sub>9</sub>H<sub>11</sub>F<sub>3</sub>NO<sub>4</sub>S<sub>2</sub> 318.0076; Found 318.0072.

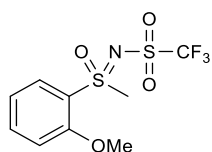

*N*-(triflyl)-*S*-(2-methoxyphenyl)-*S*-methyl sulfoximine (**3c**). **2c** (0.3 mmol; 86 mg), 1 mL H<sub>2</sub>O, 2.5 equiv. of NaOCl·5H<sub>2</sub>O (0.75 mmol, 123 mg), GP1: White solid (68 mg, 81%). <sup>1</sup>H NMR (500 MHz, Chloroform-*d*) δ 8.00 (dd, *J* = 8.0, 1.7 Hz, 1H), 7.74 (ddd, *J* = 8.4, 7.4, 1.7 Hz, 1H), 7.21 (ddd, *J* =

8.3, 7.5, 1.0 Hz, 1H), 7.15 (dd,  $J = 8.5, 1.0$  Hz, 1H), 4.04 (s, 3H), 3.63 (s, 3H).  $^{19}\text{F}$  NMR (471 MHz, Chloroform- $d$ )  $\delta$  -79.44.  $^{13}\text{C}$  NMR (126 MHz, Chloroform- $d$ )  $\delta$  157.02, 137.70, 130.26, 123.80, 121.44, 119.40 (C-F,  $^1J_{\text{C-F}} = 321.3$  Hz), 113.11, 56.78, 44.44. IR (neat):  $\nu$  3111, 3041, 3019, 2935, 1594, 1576, 1482, 1439, 1338, 1286, 1252, 1185, 1130, 1050, 1009, 968, 803, 769, 714, 669, 616 ( $\text{cm}^{-1}$ ). HRMS (ESI-TOF)  $m/z$ :  $[\text{M} + \text{H}]^+$  Calcd for  $\text{C}_9\text{H}_{11}\text{F}_3\text{NO}_4\text{S}_2$  318.0076; Found 318.0053. Mp = 97.6 – 97.8 °C.

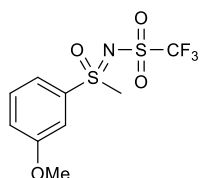

*N*-(triflyl)-*S*-(3-methoxyphenyl)-*S*-methyl sulfoximine (**3d**). **2d** (0.3 mmol; 86 mg), 1 mL  $\text{H}_2\text{O}$ , 2.5 equiv. of  $\text{NaOCl}\cdot 5\text{H}_2\text{O}$  (0.75 mmol, 123 mg), GP1: Off white solid (85 mg, 89%).  $^1\text{H}$  NMR (500 MHz, Chloroform- $d$ )  $\delta$  7.63 – 7.55 (m, 1H), 7.53 – 7.46 (m, 1H), 7.31 – 7.27 (m, 1H), 3.91 (d,  $J = 2.2$  Hz, 3H), 3.51 (s, 3H).  $^{19}\text{F}$  NMR (471 MHz, Chloroform- $d$ )  $\delta$  -79.19 – (-79.30) (m).  $^{13}\text{C}$  NMR (126 MHz, Chloroform- $d$ )  $\delta$  160.63, 138.31, 131.28, 121.73, 119.30, 119.23 ((C-F,  $^1J_{\text{C-F}} = 321.2$  Hz), 111.87, 55.98, 46.80. IR (neat):  $\nu$  3095, 3076, 3026, 3017, 2988, 2949, 2929, 2844, 1595, 1483, 1432, 1351, 1290, 1248, 1185, 1134, 1076, 1032, 985, 879, 854, 782, 764, 737, 679, 624 ( $\text{cm}^{-1}$ ). HRMS (ESI-TOF)  $m/z$ :  $[\text{M} + \text{H}]^+$  Calcd for  $\text{C}_9\text{H}_{11}\text{F}_3\text{NO}_4\text{S}_2$  318.0076; Found 318.0077. Mp = 96.1 – 96.9 °C.

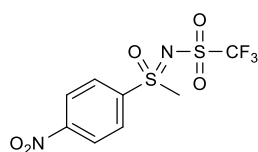

*N*-(triflyl)-*S*-(4-nitrophenyl)-*S*-methyl sulfoximine (**3e**). **2e** (0.3 mmol; 90 mg), 1 mL  $\text{H}_2\text{O}$ , 3.5 equiv. of  $\text{NaOCl}\cdot 5\text{H}_2\text{O}$  (1.05 mmol, 173 mg), GP1: Off white solid (88 mg, 88%).  $^1\text{H}$  NMR (500 MHz, Chloroform- $d$ )  $\delta$  8.53 (d,  $J = 9.0$  Hz, 2H), 8.28 (d,  $J = 9.0$  Hz, 2H), 3.59 (s, 3H).  $^{19}\text{F}$  NMR (471 MHz, Chloroform- $d$ )  $\delta$  -79.06.  $^{13}\text{C}$  NMR (126 MHz, Chloroform- $d$ )  $\delta$  151.85, 143.00, 129.28, 125.42, 119.17 (C-F,  $^1J_{\text{C-F}} = 321.0$  Hz), 46.54. IR (neat):  $\nu$  3105, 3034, 3018, 2928, 1605, 1524, 1476, 1400, 1353, 1323, 1256, 1188, 1131, 1089, 1051, 993, 853, 797, 773, 740, 713, 624 ( $\text{cm}^{-1}$ ). HRMS (ESI-TOF)  $m/z$ :  $[\text{M} + \text{H}]^+$  Calcd for  $\text{C}_8\text{H}_8\text{F}_3\text{N}_2\text{O}_5\text{S}_2$  332.9821; Found 332.982. Mp = 97.2 – 98.6 °C.

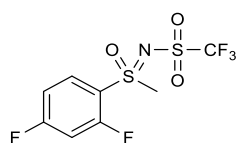

*N*-(triflyl)-*S*-(2,4-difluorophenyl)-*S*-methyl sulfoximine (**3f**). **2f** (0.3 mmol; 87 mg), 1 mL  $\text{H}_2\text{O}$ , 2.5 equiv. of  $\text{NaOCl}\cdot 5\text{H}_2\text{O}$  (0.75 mmol, 123 mg), GP1: White solid (86 mg, 89%). Column chromatography (EtoAc:hexane) for purification.  $^1\text{H}$  NMR (500 MHz, Chloroform- $d$ )  $\delta$  8.12 – 8.02 (m, 1H), 7.20 (dddd,  $J = 8.8, 7.4, 2.4, 1.1$  Hz, 1H), 7.13 (ddd,  $J = 10.4, 8.1, 2.4$  Hz, 1H), 3.64 (s, 3H).  $^{19}\text{F}$  NMR (471 MHz, Chloroform- $d$ )  $\delta$  -79.07 – (-79.49) (m), -94.66 – (-94.90), (-101.91 – (-102.23) (m).  $^{13}\text{C}$  NMR (126 MHz, Chloroform- $d$ )  $\delta$  168.91 (d, C-F,  $^1J_{\text{C-F}} = 11.9$  Hz), 166.82 (d, C-F,  $^1J_{\text{C-F}} = 11.8$  Hz), 160.67 (d, C-F,  $^1J_{\text{C-F}} = 13.2$  Hz), 158.60 (d, C-F,  $^1J_{\text{C-F}} = 13.3$  Hz), 132.41 (d, C-F,  $^1J_{\text{C-F}} = 11.1$  Hz), 121.23 – 120.85 (m), 119.09 (C-F,  $^1J_{\text{C-F}} = 321.2$  Hz), 115.26, 113.38 (dd, C-F,  $^1J_{\text{C-F}} = 22.3, 3.6$  Hz), 106.63 (dd, C-F,  $^1J_{\text{C-F}} = 26.5, 24.3$  Hz), 45.56 (d, C-F,  $^1J_{\text{C-F}} = 3.7$  Hz). IR (neat):  $\nu$  3111, 3019, 1601, 1474, 1434, 1340, 1282, 1256, 1189, 1132, 1079, 991, 976, 854, 826, 800, 770, 743, 618 ( $\text{cm}^{-1}$ ). HRMS (ESI-TOF)  $m/z$ :  $[\text{M} + \text{H}]^+$  Calcd for  $\text{C}_8\text{H}_7\text{F}_5\text{NO}_3\text{S}_2$  323.9782; Found 323.9781. Mp = 53.2 – 56.7 °C.

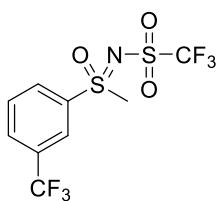

*N*-(triflyl)-*S*-(3-trifluoromethylphenyl)-*S*-methyl sulfoximine (**3g**). **2g** (0.3 mmol; 97 mg), 1 mL H<sub>2</sub>O, 2.5 equiv. of NaOCl·5H<sub>2</sub>O (0.75 mmol, 123 mg), GP1: White solid (93 mg, 87%). <sup>1</sup>H NMR (500 MHz, Chloroform-*d*) δ 8.32 – 8.24 (m, 2H), 8.09 – 8.02 (m, 1H), 7.92 – 7.85 (m, 1H), 3.58 (s, 3H). <sup>19</sup>F NMR (471 MHz, Chloroform-*d*) δ –63.37 – (–63.46 (m)), –79.06 – (–79.24 (m)). <sup>13</sup>C NMR (126 MHz, Chloroform-*d*) δ 138.80 – 138.58 (m), 132.29, 131.33, 130.90, 124.73, 122.78 (C-F, <sup>1</sup>J<sub>C-F</sub> = 273.9 Hz), 119.23 (C-F, <sup>1</sup>J<sub>C-F</sub> = 320.9 Hz), 46.81. IR (neat): ν 3078, 3032, 2936, 1609, 1437, 1350, 1326, 1285, 1262, 1198, 1173, 1031, 1106, 1093, 1045, 990, 977, 932, 915, 826, 808, 791, 764, 742, 693, 649, 631, 610 (cm<sup>-1</sup>). HRMS (ESI-TOF) *m/z*: [M + H]<sup>+</sup> Calcd for C<sub>9</sub>H<sub>8</sub>F<sub>6</sub>NO<sub>3</sub>S<sub>2</sub> 355.9855; Found 355.985. Mp = 81.7 – 83.9 °C.

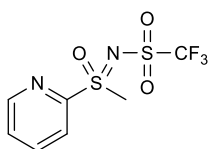

*N*-(triflyl)-*S*-(2-pyridyl)-*S*-methyl sulfoximine (**3h**). **2h** (0.3 mmol; 77 mg), 1 mL H<sub>2</sub>O, 2.5 equiv. of NaOCl·5H<sub>2</sub>O (0.75 mmol, 123 mg), GP1: Off white solid (83 mg, 96%). <sup>1</sup>H NMR (500 MHz, Chloroform-*d*) δ 8.80 (ddd, *J* = 4.8, 1.8, 0.9 Hz, 1H), 8.25 (dt, *J* = 8.0, 1.0 Hz, 1H), 8.09 (td, *J* = 7.8, 1.7 Hz, 1H), 7.70 (ddd, *J* = 7.8, 4.7, 1.1 Hz, 1H), 3.66 (s, 3H). <sup>19</sup>F NMR (471 MHz, Chloroform-*d*) δ –79.24. <sup>13</sup>C NMR (126 MHz, Chloroform-*d*) δ 155.21, 150.68, 139.08, 128.93, 122.97, 119.26 (C-F, <sup>1</sup>J<sub>C-F</sub> = 321.2 Hz), 41.58. IR (neat): ν 3022, 2936, 1580, 1454, 1425, 1346, 1322, 1251, 1193, 1155, 1133, 1084, 1047, 987, 801, 765, 749, 698, 611 (cm<sup>-1</sup>). HRMS (ESI-TOF) *m/z*: [M + H]<sup>+</sup> Calcd for C<sub>7</sub>H<sub>8</sub>F<sub>3</sub>N<sub>2</sub>O<sub>3</sub>S<sub>2</sub> 288.9923; Found 288.9924. Mp = 70.4 – 71.5 °C.

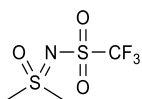

*N*-(triflyl)-*S,S*-dimethyl sulfoximine (**3i**). <sup>3</sup>**2i** (0.3 mmol; 58 mg), 1 mL H<sub>2</sub>O, 2.5 equiv. of NaOCl·5H<sub>2</sub>O (0.75 mmol, 123 mg), GP1: Off white solid (52 mg, 77%). <sup>1</sup>H NMR (500 MHz, Chloroform-*d*) δ 3.46 (s, 6H). <sup>19</sup>F NMR (471 MHz, Chloroform-*d*) δ –79.17. <sup>13</sup>C NMR (126 MHz, Chloroform-*d*) δ 119.31 (C-F, <sup>1</sup>J<sub>C-F</sub> = 320.8 Hz), 44.50. IR (neat): ν 3034, 2936, 1421, 1392, 1337, 1316, 1250, 1173, 1134, 1057, 1027, 947, 784, 751, 676, 624 (cm<sup>-1</sup>). HRMS (ESI-TOF) *m/z*: [M + H]<sup>+</sup> Calcd for C<sub>3</sub>H<sub>7</sub>F<sub>3</sub>NO<sub>3</sub>S<sub>2</sub> 225.9814; Found 225.9812. Mp = 56.0 – 57.5 °C.

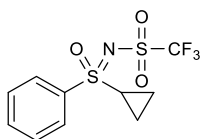

*N*-(triflyl)-*S*-phenyl-*S*-cyclopropyl sulfoximine (**3j**). **2j** (0.3 mmol; 84 mg), 1 mL H<sub>2</sub>O, 3.5 equiv. of NaOCl·5H<sub>2</sub>O (1.05 mmol, 173 mg), GP1: White solid (78 mg, 83%). <sup>1</sup>H NMR (500 MHz, Chloroform-*d*) δ 8.00 (dd, *J* = 8.3, 1.5 Hz, 2H), 7.77 (t, *J* = 7.4 Hz, 1H), 7.67 (t, *J* = 7.8 Hz, 2H), 2.87 –

2.78 (m, 1H), 1.80 – 1.71 (m, 1H), 1.46 – 1.31 (m, 2H), 1.22 – 1.12 (m, 1H). <sup>19</sup>F NMR (471 MHz, Chloroform-*d*)  $\delta$  -79.27. <sup>13</sup>C NMR (126 MHz, Chloroform-*d*)  $\delta$  137.89, 135.12, 130.13, 127.58, 119.35 (C-F, <sup>1</sup>J<sub>C-F</sub> = 321.0 Hz), 35.71, 7.93, 7.10. IR (neat):  $\nu$  3074, 1446, 1341, 1253, 1189, 1130, 1037, 902, 880, 837, 785, 757, 728, 687, 622 (cm<sup>-1</sup>). HRMS (ESI-TOF) *m/z*: [M + H]<sup>+</sup> Calcd for C<sub>10</sub>H<sub>11</sub>F<sub>3</sub>NO<sub>3</sub>S<sub>2</sub> 314.0127; Found 314.0123. Mp = 87.8 – 89.3 °C.

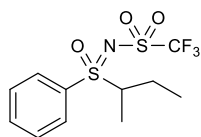

*N*-(triflyl)-*S*-phenyl-*S*-(*sec*-butyl) sulfoximine (**3k**). **2k** (0.3 mmol; 94 mg), 1 mL H<sub>2</sub>O/MeCN (1:1), 2.5 equiv. of NaOCl·5H<sub>2</sub>O (0.75 mmol, 123 mg), GP2: White solid (84 mg, 85%). <sup>1</sup>H NMR (500 MHz, Chloroform-*d*)  $\delta$  8.02 – 7.94 (m, 2H), 7.82 – 7.75 (m, 1H), 7.71 – 7.65 (m, 2H), 3.47 – 3.32 (m, 1H), 2.27 – 1.94 (m, 1H), 1.65 – 1.46 (m, 1H), 1.45 – 1.28 (m, 3H), 1.07 – 0.97 (m, 3H). <sup>19</sup>F NMR (471 MHz, Chloroform-*d*)  $\delta$  -79.30 – (-79.34) (m). <sup>13</sup>C NMR (126 MHz, Chloroform-*d*)  $\delta$  135.24, 134.27, 129.92, 129.02, 128.98, 119.18 (C-F, <sup>1</sup>J<sub>C-F</sub> = 321.1 Hz), 65.20, 64.97, 22.09, 21.87, 12.03, 11.90, 10.88. IR (neat):  $\nu$  2982, 2944, 2884, 1449, 1352, 1250, 1186, 1137, 1091, 1045, 997, 789, 753, 721, 686, 621 (cm<sup>-1</sup>). HRMS (ESI-TOF) *m/z*: [M + H]<sup>+</sup> Calcd for C<sub>11</sub>H<sub>15</sub>F<sub>3</sub>NO<sub>3</sub>S<sub>2</sub> 330.044; Found 330.0443. Mp = 41.5 – 41.9 °C.

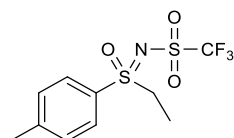

*N*-(triflyl)-*S*-(*p*-tolyl)-*S*-ethyl sulfoximine (**3l**). **2l** (0.3 mmol; 90 mg), 1 mL H<sub>2</sub>O/MeCN (1:1), 2.5 equiv. of NaOCl·5H<sub>2</sub>O (0.75 mmol, 123 mg), GP2: White solid (77 mg, 82%). <sup>1</sup>H NMR (500 MHz, Chloroform-*d*)  $\delta$  7.87 (d, *J* = 8.2 Hz, 2H), 7.47 (d, *J* = 8.2 Hz, 2H), 3.62 (dq, *J* = 14.7, 7.4 Hz, 1H), 3.51 (dq, *J* = 14.6, 7.3 Hz, 1H), 2.50 (s, 3H), 1.34 (t, *J* = 7.3 Hz, 3H). <sup>19</sup>F NMR (471 MHz, Chloroform-*d*)  $\delta$  -79.34. <sup>13</sup>C NMR (126 MHz, Chloroform-*d*)  $\delta$  147.05, 131.87, 130.83, 128.31, 119.30 (C-F, <sup>1</sup>J<sub>C-F</sub> = 321.1 Hz), 53.74, 21.86, 7.18. IR (neat):  $\nu$  2989, 2955, 1591, 1346, 1259, 1192, 1134, 1093, 1050, 1012, 819, 777, 728, 622 (cm<sup>-1</sup>). HRMS (ESI-TOF) *m/z*: [M + H]<sup>+</sup> Calcd for C<sub>10</sub>H<sub>13</sub>F<sub>3</sub>NO<sub>3</sub>S<sub>2</sub> 316.0283; Found 316.0279. Mp = 79.5 – 80.3 °C.

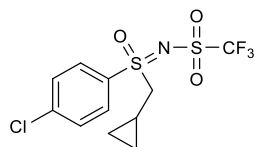

*N*-(triflyl)-*S*-(4-chlorophenyl)-*S*-cyclopropylmethyl sulfoximine (**3m**). **2m** (0.3 mmol; 99 mg), 1 mL H<sub>2</sub>O/MeCN (1:1), 2.5 equiv. of NaOCl·5H<sub>2</sub>O (0.75 mmol, 123 mg), GP2: White solid (99 mg, 91%). Flash chromatography for purification. <sup>1</sup>H NMR (500 MHz, Chloroform-*d*)  $\delta$  7.99 – 7.92 (m, 2H), 7.70 – 7.62 (m, 2H), 3.61 – 3.47 (m, 2H), 1.07 – 0.94 (m, 1H), 0.74 – 0.59 (m, 2H), 0.25 (ddq, *J* = 58.8, 10.4, 5.1 Hz, 2H). <sup>19</sup>F NMR (471 MHz, Chloroform-*d*)  $\delta$  -79.29. <sup>13</sup>C NMR (126 MHz, Chloroform-*d*)  $\delta$  142.51, 134.02, 130.30, 129.91, 119.13 (C-F, <sup>1</sup>J<sub>C-F</sub> = 321.0 Hz), 64.34, 4.74, 4.55, 4.29. IR (neat):  $\nu$  3096, 3021, 2980, 2927, 1574, 1472, 1400, 1357, 1249, 1217, 1188, 1135, 1057, 1008, 976, 919, 828, 766, 620 (cm<sup>-1</sup>). HRMS (ESI-TOF) *m/z*: [M + H]<sup>+</sup> Calcd for C<sub>11</sub>H<sub>12</sub>ClF<sub>3</sub>NO<sub>3</sub>S<sub>2</sub> 361.9894; Found 361.9893. Mp = 86.5 – 87.4 °C.



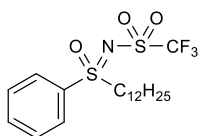

*N*-(triflyl)-*S*-phenyl-*S*-dodecyl sulfoximine (**3n**). **2n** (0.3 mmol; 123 mg), 1 mL H<sub>2</sub>O/MeCN (1:1), 2.5 equiv. of NaOCl·5H<sub>2</sub>O (0.75 mmol, 123 mg), GP2: White solid (76 mg, 57%). Column chromatography for purification. <sup>1</sup>H NMR (500 MHz, Chloroform-*d*) δ 8.04 – 7.98 (m, 2H), 7.82 – 7.76 (m, 1H), 7.72 – 7.66 (m, 2H), 3.59 (ddd, *J* = 14.1, 11.2, 5.1 Hz, 1H), 3.45 (ddd, *J* = 14.1, 11.1, 5.0 Hz, 1H), 1.84 – 1.62 (m, 2H), 1.42 – 1.14 (m, 18H), 0.87 (t, *J* = 7.2 Hz, 3H). <sup>19</sup>F NMR (471 MHz, Chloroform-*d*) δ –79.30. <sup>13</sup>C NMR (126 MHz, Chloroform-*d*) δ 135.90, 135.39, 130.19, 128.19, 119.30 (C-F, <sup>1</sup>*J*<sub>C-F</sub> = 321.1 Hz), 58.76, 32.02, 29.68, 29.64, 29.50, 29.43, 29.25, 28.96, 27.87, 22.81, 22.33, 14.25. IR (neat): ν 2917, 2850, 1471, 1451, 1347, 1241, 76, 1186, 1136, 1091, 1044, 806, 772, 742, 681, 631 (cm<sup>-1</sup>). HRMS (ESI-TOF) *m/z*: [M + H]<sup>+</sup> Calcd for C<sub>19</sub>H<sub>31</sub>F<sub>3</sub>NO<sub>3</sub>S<sub>2</sub> 442.1692; Found 442.1692. Mp = 53.0 – 55.8 °C.

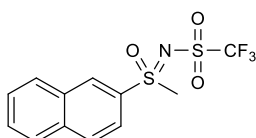

*N*-(triflyl)-*S*-naphthalenyl-*S*-methyl sulfoximine (**3o**). **2o** (0.3 mmol; 92 mg), 1 mL H<sub>2</sub>O/MeCN (1:1), 2.5 equiv. of NaOCl·5H<sub>2</sub>O (0.75 mmol, 123 mg), GP2: White solid (74 mg, 73%). <sup>1</sup>H NMR (500 MHz, Chloroform-*d*) δ 8.64 (d, *J* = 2.0 Hz, 1H), 8.12 (d, *J* = 8.8 Hz, 1H), 8.06 (dd, *J* = 8.1, 1.3 Hz, 1H), 7.99 (dd, *J* = 8.2, 1.2 Hz, 1H), 7.94 (dd, *J* = 8.8, 2.1 Hz, 1H), 7.77 (ddd, *J* = 8.2, 6.9, 1.3 Hz, 1H), 7.71 (ddd, *J* = 8.2, 6.9, 1.3 Hz, 1H), 3.59 (s, 3H). <sup>19</sup>F NMR (471 MHz, Chloroform-*d*) δ –79.16. <sup>13</sup>C NMR (126 MHz, Chloroform-*d*) δ 135.97, 133.82, 132.20, 130.93, 130.67, 130.04, 129.85, 128.73, 128.33, 121.10, 119.40 (C-F, <sup>1</sup>*J*<sub>C-F</sub> = 321.1 Hz), 47.01. IR (neat): ν 3056, 3020, 2930, 1503, 1349, 1317, 1271, 1255, 1191, 1125, 1080, 1054, 981, 942, 926, 860, 799, 761, 746, 704, 641, 628, 616 (cm<sup>-1</sup>). HRMS (ESI-TOF) *m/z*: [M + H]<sup>+</sup> Calcd for C<sub>12</sub>H<sub>11</sub>F<sub>3</sub>NO<sub>3</sub>S<sub>2</sub> 338.0127; Found 338.0123. Mp = 104.1 – 104.7 °C.

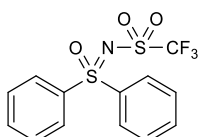

*N*-(triflyl)-*S,S*-diphenyl sulfoximine (**3p**).<sup>3</sup> **2p** (0.3 mmol; 95 mg), 1 mL H<sub>2</sub>O/MeCN (1:1), 2.5 equiv. of NaOCl·5H<sub>2</sub>O (0.75 mmol, 123 mg), GP2: White solid (87 mg, 83%). Flash chromatography (DCM) for purification. <sup>1</sup>H NMR (500 MHz, Chloroform-*d*) δ 8.06 – 8.00 (m, 4H), 7.72 – 7.67 (m, 2H), 7.64 – 7.58 (m, 4H). <sup>19</sup>F NMR (471 MHz, Chloroform-*d*) δ –79.40. <sup>13</sup>C NMR (126 MHz, Chloroform-*d*) δ 138.93, 134.89, 130.12, 127.67, 119.27 (C-F, <sup>1</sup>*J*<sub>C-F</sub> = 321.0 Hz). IR (neat): ν 3069, 1579, 1474, 1450, 1358, 1250, 1216, 1189, 1134, 1086, 1049, 995, 792, 760, 727, 677, 628 (cm<sup>-1</sup>). HRMS (ESI-TOF) *m/z*: [M + H]<sup>+</sup> Calcd for C<sub>13</sub>H<sub>11</sub>F<sub>3</sub>NO<sub>3</sub>S<sub>2</sub> 350.0127; Found 350.0128. Mp = 67.7 – 70.0 °C.

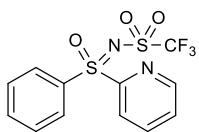

*N*-(triflyl)-*S*-phenyl-*S*-(2-pyridyl) sulfoximine (**3q**). **2q** (0.3 mmol; 95 mg), 1 mL H<sub>2</sub>O/MeCN (1:1), 2.5 equiv. of NaOCl·5H<sub>2</sub>O (0.75 mmol, 123 mg), GP2: White solid (85 mg, 81%). <sup>1</sup>H NMR (500 MHz, Chloroform-*d*) δ 8.72 – 8.67 (m, 1H), 8.36 – 8.30 (m, 1H), 8.16 (ddd, *J* = 8.5, 2.5, 1.2

H<sub>2</sub>, 2H), 8.02 (td, *J* = 7.8, 1.7 Hz, 1H), 7.77 – 7.70 (m, 1H), 7.63 (td, *J* = 7.9, 7.4, 1.4 Hz, 2H), 7.56 (ddd, *J* = 7.7, 4.6, 1.1 Hz, 1H). <sup>19</sup>F NMR (471 MHz, Chloroform-*d*) δ -79.31. <sup>13</sup>C NMR (126 MHz, Chloroform-*d*) δ 156.81, 151.02, 138.88, 135.37, 135.28, 129.81, 129.21, 128.14, 123.22, 119.28 (C-F, <sup>1</sup>*J*<sub>C-F</sub> = 321.1 Hz). IR (neat): ν 3097, 3061, 3014, 1582, 1557, 1453, 1427, 1348, 1256, 1193, 1118, 1087, 1054, 992, 798, 740, 729, 701, 681, 636 (cm<sup>-1</sup>). HRMS (ESI-TOF) *m/z*: [M + H]<sup>+</sup> Calcd for C<sub>12</sub>H<sub>10</sub>F<sub>3</sub>N<sub>2</sub>O<sub>3</sub>S<sub>2</sub> 351.0079; Found 351.0075. Mp = 90.6 – 91.1 °C.

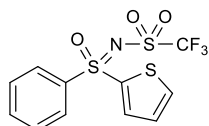

*N*-(triflyl)-*S*-(phenyl)-*S*-(2-thienyl) sulfoximine (**3r**). **2r** (0.3 mmol; 107 mg), 1 mL H<sub>2</sub>O/MeCN (1:1), 3.5 equiv. of NaOCl·5H<sub>2</sub>O (1.05 mmol, 173 mg), GP2: White solid (88 mg, 83%). <sup>1</sup>H NMR (500 MHz, Chloroform-*d*) δ 8.11 – 8.06 (m, 2H), 7.83 (ddd, *J* = 5.4, 4.4, 1.4 Hz, 2H), 7.73 – 7.68 (m, 1H), 7.64 – 7.59 (m, 2H), 7.18 (dd, *J* = 5.0, 3.9 Hz, 1H). <sup>19</sup>F NMR (471 MHz, Chloroform-*d*) δ -79.37. <sup>13</sup>C NMR (126 MHz, Chloroform-*d*) δ 139.70, 138.96, 136.80, 135.32, 134.84, 130.00, 128.81, 127.20, 119.09 (C-F, <sup>1</sup>*J*<sub>C-F</sub> = 321.1 Hz). IR (neat): ν 3107, 1449, 1397, 1358, 1252, 1189, 1136, 1089, 1047, 855, 786, 724, 679, 627 (cm<sup>-1</sup>). HRMS (ESI-TOF) *m/z*: [M + H]<sup>+</sup> Calcd for C<sub>11</sub>H<sub>9</sub>F<sub>3</sub>NO<sub>3</sub>S<sub>3</sub> 355.9691; Found 355.9693. Mp = 48.2 – 51.3 °C.

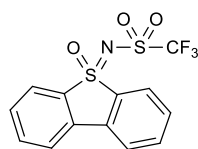

*N*-(triflyl)-dibenzo[*b,d*]thienyl sulfoximine (**3s**). **2s** (0.3 mmol; 95 mg), 1 mL H<sub>2</sub>O/MeCN (1:1), 2.5 equiv. of NaOCl·5H<sub>2</sub>O (0.75 mmol, 123 mg), GP2: White solid (93 mg, 89%). <sup>1</sup>H NMR (500 MHz, Chloroform-*d*) δ 8.15 (ddt, *J* = 8.3, 3.2, 1.6 Hz, 2H), 7.89 – 7.85 (m, 2H), 7.78 (tdt, *J* = 7.7, 2.6, 1.2 Hz, 2H), 7.63 (tdt, *J* = 7.7, 3.0, 1.4 Hz, 2H). <sup>19</sup>F NMR (471 MHz, Chloroform-*d*) δ -78.80. <sup>13</sup>C NMR (126 MHz, Chloroform-*d*) δ 135.98, 135.86, 132.73, 131.38, 125.28, 122.25, 119.45 (C-F, <sup>1</sup>*J*<sub>C-F</sub> = 321.7 Hz). IR (neat): ν 3096, 2921, 1590, 1578, 1482, 1451, 1351, 1287, 1251, 1184, 1124, 1068, 1034, 954, 795, 760, 743, 705, 686, 625 (cm<sup>-1</sup>). HRMS (ESI-TOF) *m/z*: [M + H]<sup>+</sup> Calcd for C<sub>13</sub>H<sub>9</sub>F<sub>3</sub>NO<sub>3</sub>S<sub>2</sub> 347.997; Found 347.9974. Mp = 137.6 – 140.5 °C.

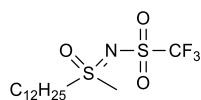

*N*-(triflyl)-*S*-dodecyl-*S*-methyl sulfoximine (**3t**). **2t** (0.3 mmol; 104 mg), 1 mL H<sub>2</sub>O/MeCN (1:1), 2.5 equiv. of NaOCl·5H<sub>2</sub>O (0.75 mmol, 123 mg), GP2: White solid (86 mg, 76%). Column chromatography (DCM) for purification. <sup>1</sup>H NMR (500 MHz, Chloroform-*d*) δ 3.50 – 3.32 (m, 5H), 2.00 – 1.86 (m, 2H), 1.53 – 1.45 (m, 2H), 1.40 – 1.20 (m, 13H), 0.88 (t, *J* = 6.9 Hz, 3H). <sup>19</sup>F NMR (471 MHz, Chloroform-*d*) δ -79.15. <sup>13</sup>C NMR (126 MHz, Chloroform-*d*) δ 119.35 (C-F, <sup>1</sup>*J*<sub>C-F</sub> = 321.0 Hz) 56.96, 41.78, 32.03, 29.71, 29.67, 29.55, 29.45, 29.30, 29.03, 28.07, 22.82, 22.40, 14.26. IR (neat): ν 3022, 2953, 2873, 2852, 2921, 1468, 1344, 1240, 1185, 1140, 1067, 973, 806, 769, 727, 691, 618 (cm<sup>-1</sup>). HRMS (ESI-TOF) *m/z*: [M + H]<sup>+</sup> Calcd for C<sub>14</sub>H<sub>29</sub>F<sub>3</sub>NO<sub>3</sub>S<sub>2</sub> 380.1535; Found 380.1536. Mp = 68.6 – 69.7 °C.

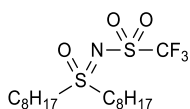

*N*-(triflyl)-*S,S*-dioctyl sulfoximine (**3u**). **2u** (0.3 mmol; 125 mg), 1 mL H<sub>2</sub>O/MeCN (1:1), 2.5 equiv. of NaOCl·5H<sub>2</sub>O (0.75 mmol, 123 mg), GP2: Colorless oil (115 mg, 91%). Flash chromatography (DCM) for purification. <sup>1</sup>H NMR (500 MHz, Chloroform-*d*) δ 3.55 – 3.26 (m, 4H), 1.91 (dtd, *J* = 13.6, 8.4, 7.9, 5.5 Hz, 4H), 1.54 – 1.43 (m, 4H), 1.40 – 1.23 (m, 16H), 0.91 – 0.85 (m, 6H). <sup>19</sup>F NMR (471 MHz, Chloroform-*d*) δ –79.11. <sup>13</sup>C NMR (126 MHz, Chloroform-*d*) δ 119.22 (C-F, <sup>1</sup>*J*<sub>C-F</sub> = 321.1 Hz), 54.15, 31.61, 28.87, 28.85, 28.05, 22.56, 22.17, 14.04. IR (neat): ν 2956, 2927, 2858, 1405, 1349, 1188, 1138, 1058, 790, 723, 616 (cm<sup>-1</sup>). HRMS (ESI-TOF) *m/z*: [M + H]<sup>+</sup> Calcd for C<sub>17</sub>H<sub>35</sub>F<sub>3</sub>NO<sub>3</sub>S<sub>2</sub> 422.2005; Found 422.201.

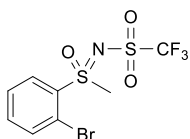

*N*-(triflyl)-*S*-(2-bromophenyl)-*S*-methyl sulfoximine (**3v**). **2v** (0.3 mmol; 100 mg), 1 mL DCM, 2.5 equiv. of *m*-CPBA (0.75 mmol, 130 mg), GP3: White solid (106 mg, 96%). <sup>1</sup>H NMR (500 MHz, Chloroform-*d*) δ 8.31 – 8.25 (m, 1H), 7.88 (dd, *J* = 7.5, 1.6 Hz, 1H), 7.67 – 7.59 (m, 2H), 3.76 (s, 3H). <sup>19</sup>F NMR (471 MHz, Chloroform-*d*) δ –79.15. <sup>13</sup>C NMR (126 MHz, Chloroform-*d*) δ 136.57, 136.43, 136.28, 131.63, 120.47, 119.23 (C-F, <sup>1</sup>*J*<sub>C-F</sub> = 320.9 Hz), 44.08. IR (neat): ν 3108, 3028, 3012, 2878, 1570, 1446, 1348, 1261, 1183, 1126, 1051, 979, 791, 758, 746, 2, 704, 641, 614 (cm<sup>-1</sup>). HRMS (ESI-TOF) *m/z*: [M + H]<sup>+</sup> Calcd for C<sub>8</sub>H<sub>8</sub>BrF<sub>3</sub>NO<sub>3</sub>S<sub>2</sub> 365.9076; Found 365.9073. Mp = 107.3 – 107.8 °C.

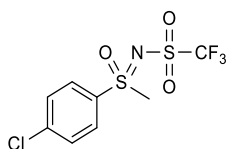

*N*-(triflyl)-*S*-(4-chlorophenyl)-*S*-methyl sulfoximine (**3w**). **2w** (0.3 mmol; 87 mg), 1 mL DCM, 2.5 equiv. of *m*-CPBA (0.75 mmol, 130 mg), GP3: White semi solid (81 mg, 84%). <sup>1</sup>H NMR (500 MHz, Chloroform-*d*) δ 7.99 (d, *J* = 8.8 Hz, 2H), 7.67 (d, *J* = 8.7 Hz, 2H), 3.53 (s, 3H). <sup>19</sup>F NMR (471 MHz, Chloroform-*d*) δ –79.19. <sup>13</sup>C NMR (126 MHz, Chloroform-*d*) δ 142.74, 135.65, 130.69, 128.99, 119.25 (C-F, <sup>1</sup>*J*<sub>C-F</sub> = 320.9 Hz), 46.97. IR (neat): ν 3034, 2937, 1579, 1476, 1397, 1351, 1253, 1209, 1187, 1133, 1085, 1055, 1010, 970, 836, 826, 793, 775, 754, 725, 623 (cm<sup>-1</sup>). HRMS (ESI-TOF) *m/z*: [M + H]<sup>+</sup> Calcd for C<sub>8</sub>H<sub>8</sub>ClF<sub>3</sub>NO<sub>3</sub>S<sub>2</sub> 321.9581; Found 321.9578. Mp = 91.5 – 93.0 °C.

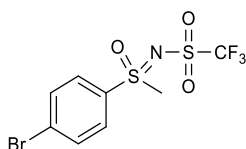

*N*-(triflyl)-*S*-(4-bromophenyl)-*S*-methyl sulfoximine (**3x**).<sup>3</sup> **2x** (0.3 mmol; 100 mg), 1 mL DCM, 2.5 equiv. of *m*-CPBA (0.75 mmol, 130 mg), GP3: White solid (91 mg, 83%). <sup>1</sup>H NMR (500 MHz, Chloroform-*d*) δ 7.92 – 7.89 (m, 2H), 7.85 – 7.81 (m, 2H), 3.52 (s, 3H). <sup>19</sup>F NMR (471 MHz, Chloroform-*d*) δ –79.18. <sup>13</sup>C NMR (126 MHz, Chloroform-*d*) δ 136.25, 133.69, 131.38, 128.96, 119.24 (C-F, <sup>1</sup>*J*<sub>C-F</sub> = 321.0 Hz), 46.92. IR (neat): ν 3025, 2931, 1571, 1392, 1351, 1253, 1208, 1188, 1134, 1091, 1055, 1007, 969, 823, 792, 772, 750, 712, 624 (cm<sup>-1</sup>). HRMS (ESI-TOF) *m/z*: [M + H]<sup>+</sup> Calcd for C<sub>8</sub>H<sub>8</sub>BrF<sub>3</sub>NO<sub>3</sub>S<sub>2</sub> 365.9076; Found 365.9079. Mp = 113.1 – 114.7 °C.

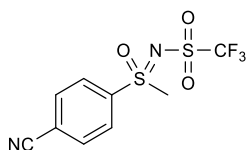

*N*-(triflyl)-*S*-(4-cyanophenyl)-*S*-methyl sulfoximine (**3y**).<sup>3</sup> **2y** (0.3 mmol; 84 mg), 1 mL DCM, 3.5 equiv. of *m*-CPBA (1.05 mmol, 182 mg), GP3: White solid (58 mg, 62%). <sup>1</sup>H NMR (500 MHz, DMSO-*d*<sub>6</sub>) δ 8.29 (d, *J* = 1.7 Hz, 4H), 4.00 (s, 3H). <sup>19</sup>F NMR (471 MHz, DMSO-*d*<sub>6</sub>) δ -78.76. <sup>13</sup>C NMR (126 MHz, DMSO-*d*<sub>6</sub>) δ 141.47, 133.95, 128.37, 118.28 (C-F, <sup>1</sup>*J*<sub>C-F</sub> = 321.5 Hz), 117.56, 117.30, 44.14. IR (neat): ν 3095, 3046, 3026, 2937, 2240, 1523, 1393, 1341, 1253, 1188, 1130, 1087, 1055, 990, 840, 801, 733, 622 (cm<sup>-1</sup>). HRMS (ESI-TOF) *m/z*: [M + H]<sup>+</sup> Calcd for C<sub>9</sub>H<sub>8</sub>F<sub>3</sub>N<sub>2</sub>O<sub>2</sub>S<sub>2</sub> 312.9923; Found 312.9925. Mp = 180.0 – 180.5 °C.

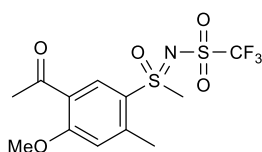

*N*-(triflyl)-*S*-(5-acetyl-4-methoxy-2-methylphenyl)-*S*-methyl sulfoximine (**3z**). **2z** (0.3 mmol; 102 mg), 1 mL DCM, 2.5 equiv. of *m*-CPBA (0.75 mmol, 130 mg), GP3: White solid (91 mg, 81%). Column chromatography for purification. <sup>1</sup>H NMR (500 MHz, Chloroform-*d*) δ 8.42 (s, 1H), 6.99 (s, 1H), 4.04 (s, 3H), 3.55 (s, 3H), 2.79 (s, 3H), 2.62 (s, 3H). <sup>19</sup>F NMR (471 MHz, Chloroform-*d*) δ -79.24. <sup>13</sup>C NMR (126 MHz, Chloroform-*d*) δ 196.65, 163.03, 144.30, 132.74, 127.30, 126.95, 119.26 (C-F, <sup>1</sup>*J*<sub>C-F</sub> = 321.2 Hz), 116.80, 56.59, 45.87, 31.79, 21.35. IR (neat): ν 3024, 3007, 2923, 2852, 1678, 1594, 1547, 1486, 1473, 1416, 1388, 1345, 1331, 1262, 1247, 1229, 1187, 1137, 1086, 1042, 974, 924, 862, 794, 769, 735, 709, 639, 611 (cm<sup>-1</sup>). HRMS (ESI-TOF) *m/z*: [M + H]<sup>+</sup> Calcd for C<sub>12</sub>H<sub>15</sub>F<sub>3</sub>NO<sub>5</sub>S<sub>2</sub> 374.0338; Found 374.0334. Mp = 163.9 – 167.7 °C (decomposition).

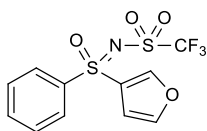

*N*-(triflyl)-*S*-phenyl-*S*-(3-furyl) sulfoximine (**3aa**). **2aa** (0.3 mmol; 92 mg), 1 mL DCM, 2.5 equiv. of *m*-CPBA (0.75 mmol, 130 mg), GP3: Colourless oil (88 mg, 95%). Flash chromatography (DCM) for purification. <sup>1</sup>H NMR (500 MHz, Chloroform-*d*) δ 8.18 (dd, *J* = 1.6, 0.9 Hz, 1H), 8.09 – 8.02 (m, 2H), 7.77 – 7.71 (m, 1H), 7.68 – 7.61 (m, 2H), 7.56 (t, *J* = 1.8 Hz, 1H), 6.68 (dd, *J* = 2.1, 0.9 Hz, 1H). <sup>19</sup>F NMR (471 MHz, Chloroform-*d*) δ -79.38. <sup>13</sup>C NMR (126 MHz, Chloroform-*d*) δ 147.80, 146.25, 138.74, 135.17, 130.16, 127.45, 126.92, 119.24 (C-F, <sup>1</sup>*J*<sub>C-F</sub> = 321.0 Hz), 108.46. IR (neat): ν 3150, 1543, 1498, 1449, 1355, 1263, 1189, 1134, 1050, 945, 870, 788, 726, 682, 643 (cm<sup>-1</sup>). HRMS (ESI-TOF) *m/z*: [M + H]<sup>+</sup> Calcd for C<sub>11</sub>H<sub>9</sub>F<sub>3</sub>NO<sub>4</sub>S<sub>2</sub> 339.992; Found 339.9922.

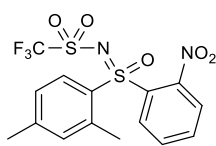

*N*-(triflyl)-*S*-(2,4-dimethylphenyl)-*S*-(2-nitrophenyl) sulfoximine (**3ab**). **2ab** (0.3 mmol; 117 mg), 1 mL DCM, 2.5 equiv. of *m*-CPBA (0.75 mmol, 130 mg), GP3: Brown solid (108 mg,

85%). Column chromatography (DCM) for purification.  $^1\text{H NMR}$  (500 MHz, Chloroform-*d*)  $\delta$  8.59 – 8.54 (m, 1H), 8.03 – 7.89 (m, 4H), 7.29 – 7.26 (m, 1H), 7.16 – 7.13 (m, 1H), 2.43 (s, 3H), 2.40 (s, 3H).  $^{19}\text{F NMR}$  (471 MHz, Chloroform-*d*)  $\delta$  -79.21.  $^{13}\text{C NMR}$  (126 MHz, Chloroform-*d*)  $\delta$  147.86, 146.96, 137.89, 136.05, 134.32, 133.14, 132.37, 132.28, 132.23, 130.40, 127.65, 126.30, 119.08 (C-F,  $^1J_{\text{C-F}} = 321.1$  Hz), 21.54, 20.03. **HRMS (ESI-TOF)**  $m/z$ :  $[\text{M} + \text{H}]^+$  Calcd for  $\text{C}_{15}\text{H}_{14}\text{F}_3\text{N}_2\text{O}_5\text{S}_2$  423.0291; Found 423.0286.  $\text{Mp} = 106.9 - 107.5^\circ\text{C}$ .

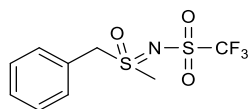

*N*-(triflyl)-*S*-benzyl-*S*-methyl sulfoximine (**3ac**). **2ac** (0.3 mmol; 81 mg), 1 mL DCM, 2.5 equiv. of *m*-CPBA (0.75 mmol, 130 mg), GP3: White solid (57 mg, 63%).  $^1\text{H NMR}$  (500 MHz, Chloroform-*d*)  $\delta$  7.54 – 7.42 (m, 5H), 4.84 – 4.66 (m, 2H), 3.17 (s, 3H).  $^{19}\text{F NMR}$  (471 MHz, Chloroform-*d*)  $\delta$  -79.09.  $^{13}\text{C NMR}$  (126 MHz, Chloroform-*d*)  $\delta$  131.25, 130.62, 129.67, 125.19, 119.22 (C-F,  $^1J_{\text{C-F}} = 321.1$  Hz), 63.11, 39.85. **IR (neat)**:  $\nu$  3033, 3004, 2979, 2924, 1412, 1347, 1248, 1187, 1135, 1072, 984, 929, 885, 774, 729, 698, 664, 616 ( $\text{cm}^{-1}$ ). **HRMS (ESI-TOF)**  $m/z$ :  $[\text{M} + \text{H}]^+$  Calcd for  $\text{C}_9\text{H}_{11}\text{F}_3\text{NO}_3\text{S}_2$  302.0132; Found 302.0129.  $\text{Mp} = 99.0 - 99.8^\circ\text{C}$ .

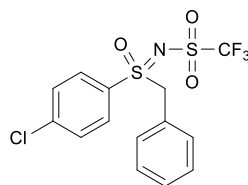

*N*-(triflyl)-*S*-(4-chlorophenyl)-*S*-benzyl sulfoximine (**3ad**). **2ad** (0.3 mmol; 110 mg), 1 mL DCM, 2.5 equiv. of *m*-CPBA (0.75 mmol, 130 mg), GP3: White solid (106 mg, 89%).  $^1\text{H NMR}$  (500 MHz, Chloroform-*d*)  $\delta$  7.61 – 7.57 (m, 2H), 7.52 – 7.47 (m, 2H), 7.42 – 7.37 (m, 1H), 7.30 (dd,  $J = 8.5, 7.0$  Hz, 2H), 7.07 – 7.03 (m, 2H), 4.81 (dd,  $J = 87.2, 14.0$  Hz, 2H).  $^{19}\text{F NMR}$  (471 MHz, Chloroform-*d*)  $\delta$  -79.16.  $^{13}\text{C NMR}$  (126 MHz, Chloroform-*d*)  $\delta$  142.68, 132.47, 131.57, 130.41, 130.27, 130.06, 129.22, 125.05, 119.26 (C-F,  $^1J_{\text{C-F}} = 321.2$  Hz), 65.61. **IR (neat)**:  $\nu$  3109, 3065, 2983, 2931, 1568, 1495, 1471, 1396, 1347, 1248, 1194, 1126, 1088, 1056, 1007, 822, 761, 739, 693, 627. ( $\text{cm}^{-1}$ ). **HRMS (ESI-TOF)**  $m/z$ :  $[\text{M} + \text{H}]^+$  Calcd for  $\text{C}_{14}\text{H}_{12}\text{ClF}_3\text{NO}_3\text{S}_2$  397.9894; Found 397.9885.  $\text{Mp} = 133.7 - 134.9^\circ\text{C}$ .

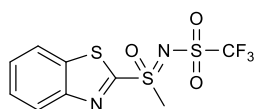

*N*-(triflyl)-*S*-(benzo[*d*]thiazol-2-yl)-*S*-methyl sulfoximine (**3ae**). **2ae** (0.22 mmol; 70 mg), 1 mL DCM, 2.5 equiv. of *m*-CPBA (0.55 mmol, 95 mg), GP3: Off white solid (67 mg, 87%).  $^1\text{H NMR}$  (500 MHz, Chloroform-*d*)  $\delta$  8.28 – 8.23 (m, 1H), 8.08 – 8.03 (m, 1H), 7.74 – 7.65 (m, 2H), 3.86 (s, 3H).  $^{19}\text{F NMR}$  (471 MHz, Chloroform-*d*)  $\delta$  -78.93.  $^{13}\text{C NMR}$  (126 MHz, Chloroform-*d*)  $\delta$  162.83, 152.44, 137.75, 129.24, 128.49, 125.98, 122.58, 119.21 (C-F,  $^1J_{\text{C-F}} = 321.1$  Hz), 44.38. **IR (neat)**:  $\nu$  3045, 3007, 2914, 1552, 1463, 1415, 1358, 1320, 1252, 1211, 1186, 1138, 1090, 1065, 1025, 973, 857, 793, 764, 724, 696, 621 ( $\text{cm}^{-1}$ ). **HRMS (ESI-TOF)**  $m/z$ :  $[\text{M} + \text{H}]^+$  Calcd for  $\text{C}_9\text{H}_8\text{F}_3\text{N}_2\text{O}_3\text{S}_3$  344.9644; Found 344.9645.  $\text{Mp} = 106.1 - 107.6^\circ\text{C}$ .

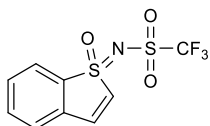

*N*-(triflyl)-*S*-(benzo[*b*]thienyl) sulfoximine (**3af**). **2af** (0.3 mmol; 80 mg), 1 mL DCM, 2.5 equiv. of *m*-CPBA (0.75 mmol, 130 mg), GP3: Colorless oil (72 mg, 85%). <sup>1</sup>H NMR (500 MHz, Chloroform-*d*) δ 8.03 (d, *J* = 7.6 Hz, 1H), 7.70 (dtd, *J* = 32.6, 7.6, 1.1 Hz, 2H), 7.52 (ddd, *J* = 20.9, 7.0, 1.0 Hz, 2H), 7.24 (d, *J* = 6.7 Hz, 1H). <sup>19</sup>F NMR (471 MHz, Chloroform-*d*) δ -78.78. <sup>13</sup>C NMR (126 MHz, Chloroform-*d*) δ 135.76, 135.70, 135.05, 132.02, 131.94, 129.42, 126.44, 124.38, 119.37 (C-F, <sup>1</sup>*J*<sub>C-F</sub> = 321.5 Hz). IR (neat): ν 3118, 3095, 1548, 1464, 1354, 1296, 1251, 1186, 1129, 1082, 1031, 870, 795, 760, 684, 607 (cm<sup>-1</sup>). HRMS (ESI-TOF) *m/z*: [M + H]<sup>+</sup> Calcd for C<sub>9</sub>H<sub>7</sub>F<sub>3</sub>NO<sub>3</sub>S<sub>2</sub> 297.9801; Found 297.9805.

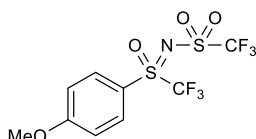

*N*-(triflyl)-*S*-(4-methoxyphenyl)-*S*-trifluoromethyl sulfoximine (**3ag**). **2ag** (0.3 mmol; 102 mg), 1 mL DCM, 2.5 equiv. of *m*-CPBA (0.75 mmol, 130 mg), GP3: Colorless oil (89 mg, 80%). Column chromatography (DCM) for purification. <sup>1</sup>H NMR (500 MHz, Chloroform-*d*) δ 8.09 – 8.04 (m, 2H), 7.23 – 7.18 (m, 2H), 3.99 (s, 3H). <sup>19</sup>F NMR (471 MHz, Chloroform-*d*) δ -76.81, -79.11. <sup>13</sup>C NMR (126 MHz, Chloroform-*d*) δ 167.67, 133.47, 120.02 (C-F, <sup>1</sup>*J*<sub>C-F</sub> = 327.5 Hz), 119.05 (C-F, <sup>1</sup>*J*<sub>C-F</sub> = 320.5 Hz), 118.48, 116.33, 56.49. IR (neat): ν 3108, 2952, 2906, 2804, 1588, 1496, 1464, 1443, 1374, 1277, 1198, 1165, 1128, 1089, 1045, 837, 809, 785, 752, 678, 658, 630 (cm<sup>-1</sup>). HRMS (ESI-TOF) *m/z*: [M + H]<sup>+</sup> Calcd for C<sub>9</sub>H<sub>8</sub>F<sub>6</sub>NO<sub>4</sub>S<sub>2</sub> 371.9793; Found 371.979.

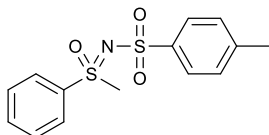

*N*-(tosyl)-*S*-phenyl-*S*-methyl sulfoximine (**7**).<sup>4</sup> **6** (0.3 mmol; 83 mg), 1 mL H<sub>2</sub>O, 2.5 equiv. of NaOCl·5H<sub>2</sub>O (0.75 mmol, 123 mg), GP1: White solid (86 mg, 92%). <sup>1</sup>H NMR (500 MHz, Chloroform-*d*) δ 8.05 – 7.97 (m, 2H), 7.88 – 7.82 (m, 2H), 7.73 – 7.67 (m, 1H), 7.63 – 7.57 (m, 2H), 7.28 – 7.23 (m, 2H), 3.43 (s, 3H), 2.40 (s, 3H). <sup>13</sup>C NMR (126 MHz, Chloroform-*d*) δ 143.02, 140.73, 138.47, 134.51, 129.83, 129.41, 127.61, 126.77, 46.77, 21.65. IR (neat): ν 3020, 2921, 1597, 1479, 1448, 1403, 1313, 1226, 1145, 1087, 1060, 980, 809, 790, 742, 705, 683, 652 (cm<sup>-1</sup>). HRMS (ESI-TOF) *m/z*: [M + H]<sup>+</sup> Calcd for C<sub>14</sub>H<sub>16</sub>NO<sub>3</sub>S<sub>2</sub> 310.0566; Found 310.0563. Mp = 96.4 – 98.1 °C.

References:

- 1) C. Bohnen and C. Bolm, *Org. Lett.*, 2015, **17**, 3011–3013.
- 2) D. Craig, N. J. Geach, C. J. Pearson, A. M. Z. Slawin, A. J. P. White and D. J. Williams, *Tetrahedron* 1995, **51**, 6071-60983.
- 3) M. Ochiai, M. Naito, K. Miyamoto, S. Hayashi and W. Nakanishi, *Chem. Eur. J.*, 2010, **16**, 8713–8718.
- 4) G. Y. Cho and C. Bolm, *Org. Lett.*, 2005, **7**, 4983.

## Post-modification reactions

### Post-modification reaction procedures

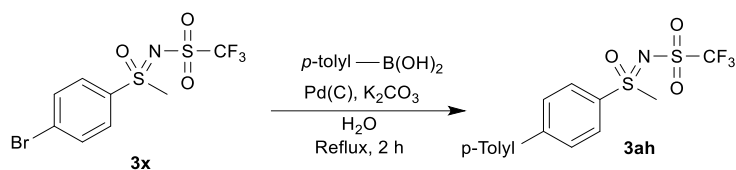

A round bottom flask was charged with *N*-(trifluoromethylsulfonyl)idene)-*S*-(4-bromophenyl)-*S*-methyl sulfoximine (**3x**) (183 mg, 0.5 mmol), 4-methylphenyl boronic acid (1.33 equiv.) and K<sub>2</sub>CO<sub>3</sub> (3 equiv.). Water (15 mL) was added along with palladium on carbon (tip of the spatula) and the reaction mixture was stirred under reflux for 2 h. After 2 h the reaction mixture was cooled to room temperature and extracted with EtOAc. The solvent was removed under reduced pressure and the residue was purified by column chromatography (DCM) yielding **3ah** (165 mg, 88%).

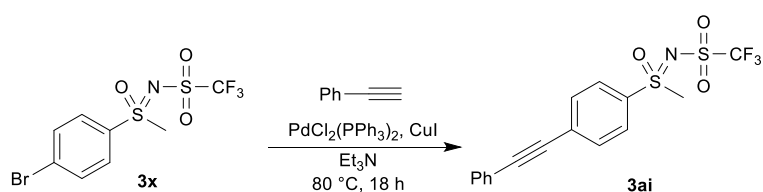

A dried flask was charged with *N*-(trifluoromethylsulfonyl)idene)-*S*-(4-bromophenyl)-*S*-methyl sulfoximine (**3x**) (73 mg, 0.2 mmol) and Et<sub>3</sub>N (2 mL). To this solution PdCl<sub>2</sub>(PPh<sub>3</sub>)<sub>2</sub> (4 mg, 3 mol%) and CuI (1 mg, 3 mol%) were added and the reaction mixture was stirred for 5 min under an inert atmosphere, followed by addition of phenylacetylene (26 μL, 1.2 equiv.). The resulting mixture was then heated under an inert atmosphere at 80 °C for 18 h. The mixture was cooled to room temperature, and solvent removed under reduced pressure. The crude product was purified by column chromatography yielding **3ai** as an off white solid (64 mg, 83%).

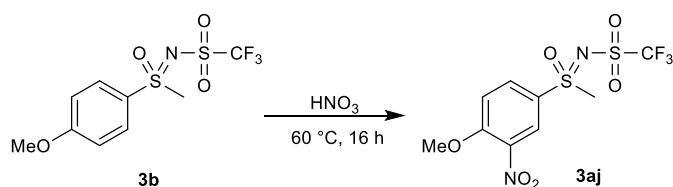

To a flask charged with *N*-(triflyl)-*S*-(4-methoxyphenyl)-*S*-methyl sulfoximine (**3b**) (32 mg, 0.1 mmol) was added 1 mL of a mixture of aqueous HNO<sub>3</sub> (68%) and H<sub>2</sub>SO<sub>4</sub> (98%) (2:1 (V/V)). The reaction mixture was heated to 60 °C and stirred for 16 h. The acid was neutralised by addition of saturated aqueous NaHCO<sub>3</sub> solution and extracted with DCM. The organic phase was dried and the solvent was removed under reduced pressure and the residue was purified using flash chromatography (EtOAc and hexane 1/1) yielding **3aj** as a colorless semi solid (28 mg, 78%).

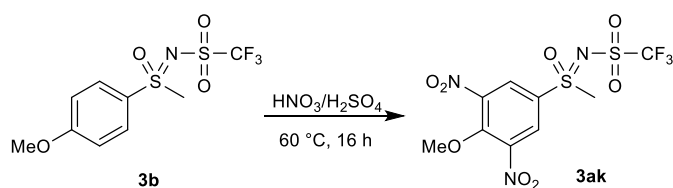

To a flask charged with *N*-(triflyl)-*S*-(4-methoxyphenyl)-*S*-methyl sulfoximine (**3b**) (40 mg, 0.13 mmol) was added 1 mL of a mixture aqueous HNO<sub>3</sub> (68%) and H<sub>2</sub>SO<sub>4</sub> (98%) (1:2 (V/V)). The reaction mixture was heated to 60 °C and stirred for 16 h. The acid was neutralised by addition of saturated aqueous

NaHCO<sub>3</sub> solution and extracted with EtOAc. The organic phase was dried and the solvent was removed under reduced pressure and the residue was purified using flash chromatography (DCM) yielding **3ak** as a yellow solid (33 mg, 65%).

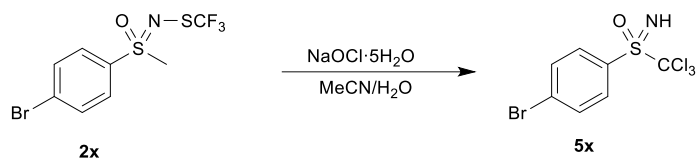

A flask was charged with *N*-trifluoromethylthio-*S*-(4-bromophenyl)-*S*-methyl sulfoximine (**2x**) (100 mg, 0.3 mmol), water (0.5 mL), MeCN (0.5 mL), NaOCl·5H<sub>2</sub>O (4 equiv.) and the reaction mixture was stirred at r.t. for 2 h. The reaction mixture was then extracted twice with EtOAc and the organic phase was dried under anhydrous Na<sub>2</sub>SO<sub>4</sub>. Evaporation of the solvent under reduced pressure yielded the product **5x** as a white solid (98 mg, 97%). Some minor impurities are present which could not be removed due to the decomposition of the product during chromatography separation.

### Characterization of post-modification products

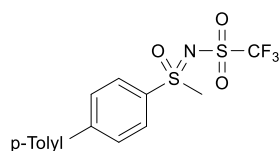

*N*-(triflyl)-*S*-(4'-methyl-[1,1'-biphenyl]-4-yl)-*S*-methyl sulfoximine (**3ah**). **2y** (0.5 mmol; 183 mg), 1.33 equiv. 4-methylphenyl boronic acid (0.665 mmol, 90 mg), 3 equiv. K<sub>2</sub>CO<sub>3</sub> (1.5 mmol, 207 mg), catalytic amount of Pd/C: White solid (165 mg, 88%). Flash chromatography (DCM) for purification. <sup>1</sup>H NMR (500 MHz, Chloroform-*d*) δ 8.11 – 8.04 (m, 2H), 7.88 – 7.82 (m, 2H), 7.57 – 7.50 (m, 2H), 7.35 – 7.29 (m, 2H), 3.55 (s, 3H), 2.43 (s, 3H). <sup>19</sup>F NMR (471 MHz, Chloroform-*d*) δ –79.20. <sup>13</sup>C NMR (126 MHz, Chloroform-*d*) δ 148.63, 139.66, 135.54, 135.11, 130.16, 128.51, 128.02, 127.45, 119.36 (C-F, <sup>1</sup>J<sub>C-F</sub> = 321.1 Hz), 47.16, 21.38. IR (neat): ν 3020, 2931, 1589, 1484, 1396, 1347, 1251, 1190, 1133, 1095, 1049, 969, 849, 810, 792, 771, 752, 724, 630 (cm<sup>-1</sup>). HRMS (ESI-TOF) *m/z*: [M + H]<sup>+</sup> Calcd for C<sub>15</sub>H<sub>14</sub>F<sub>3</sub>NO<sub>3</sub>S<sub>2</sub> 378.044; Found 378.0437. Mp = 153.0 – 153.4 °C.

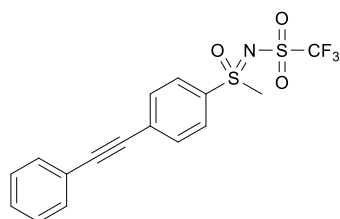

*N*-(triflyl)-*S*-(4-(phenylethynyl)phenyl)-*S*-methyl sulfoximine (**3ai**). **2y** (0.2 mmol; 73 mg), 1.2 equiv. phenylacetylene (0.24 mmol, 24 mg), 3 mol% PdCl<sub>2</sub>(PPh<sub>3</sub>)<sub>2</sub> (0.006 mmol, 4 mg), 3 mol% CuI (0.006 mmol, 1 mg): Off white solid (64 mg, 83%). Flash chromatography (DCM) for purification. <sup>1</sup>H NMR (500 MHz, Chloroform-*d*) δ 8.05 – 7.97 (m, 2H), 7.81 – 7.75 (m, 2H), 7.60 – 7.54 (m, 2H), 7.45 – 7.37 (m, 3H), 3.54 (s, 3H). <sup>19</sup>F NMR (471 MHz, Chloroform-*d*) δ –79.17. <sup>13</sup>C NMR (126 MHz, Chloroform-*d*) δ 135.89, 133.02, 132.09, 131.36, 129.65, 128.73, 127.53, 121.94, 119.32 (C-F, <sup>1</sup>J<sub>C-F</sub> = 321.0 Hz), 95.37, 87.16, 46.98. IR (neat): ν 3030, 2933, 2219, 1585, 1493, 1442, 1399, 1347, 1257, 1221, 1202, 1183, 1136, 1088, 1043, 1013, 989, 957, 838, 795, 763, 750, 720, 693,



629 (cm<sup>-1</sup>). **HRMS (ESI-TOF)** *m/z*: [M + H]<sup>+</sup> Calcd for C<sub>16</sub>H<sub>13</sub>F<sub>3</sub>NO<sub>3</sub>S<sub>2</sub> 388.0283; Found 388.0282. Mp = 150.8 – 151.8 °C.

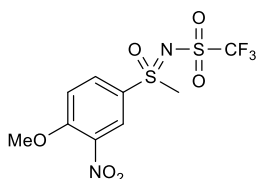

*N*-(triflyl)-*S*-(4-methoxy-3-nitrophenyl)-*S*-methyl sulfoximine (**3aj**). **3b** (0.1 mmol; 32 mg), 1 mL HNO<sub>3</sub> (68%): Colorless semi solid (28 mg, 78%). Flash chromatography (DCM) for purification **<sup>1</sup>H NMR** (500 MHz, Chloroform-*d*) δ 8.49 (d, *J* = 2.5 Hz, 1H), 8.21 (dd, *J* = 9.0, 2.5 Hz, 1H), 7.38 (d, *J* = 9.0 Hz, 1H), 4.12 (s, 3H), 3.56 (s, 3H). **<sup>19</sup>F NMR** (471 MHz, Chloroform-*d*) δ -79.13. **<sup>13</sup>C NMR** (126 MHz, Chloroform-*d*) δ 157.99, 139.82, 133.35, 128.62, 125.91, 119.20 (C-F, <sup>1</sup>*J*<sub>C-F</sub> = 321.1 Hz), 115.25, 57.73, 47.18. **IR (neat)**: ν 3028, 2932, 1605, 1573, 1534, 1492, 1463, 1441, 1350, 1289, 1254, 1184, 1135, 1051, 1005, 980, 889, 824, 798, 764, 738, 681, 618 (cm<sup>-1</sup>). **HRMS (ESI-TOF)** *m/z*: [M + H]<sup>+</sup> Calcd for C<sub>9</sub>H<sub>10</sub>F<sub>3</sub>N<sub>2</sub>O<sub>6</sub>S<sub>2</sub> 362.9927; Found 362.9921.

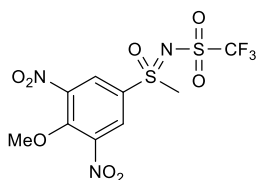

*N*-(triflyl)-*S*-(4-methoxy-3,5-dinitrophenyl)-*S*-methyl sulfoximine (**3ak**). **3b** (0.13 mmol; 40 mg), 1 mL (HNO<sub>3</sub> (68%):H<sub>2</sub>SO<sub>4</sub> (98%) = 1:2): Yellow solid (33 mg, 65%). Flash chromatography (DCM) for purification. **<sup>1</sup>H NMR** (500 MHz, Chloroform-*d*) δ 8.64 (s, 2H), 4.20 (s, 3H), 3.64 (s, 3H). **<sup>19</sup>F NMR** (471 MHz, Chloroform-*d*) δ -78.88. **<sup>13</sup>C NMR** (126 MHz, Chloroform-*d*) δ 152.62, 145.35, 132.54, 128.19, 118.92 (C-F, <sup>1</sup>*J*<sub>C-F</sub> = 320.9 Hz), 65.40, 46.69. **IR (neat)**: ν 3033, 2941, 1613, 1544, 1478, 1342, 1292, 1255, 1191, 1136, 1095, 1065, 969, 921, 884, 809, 787, 764, 740, 714, 683, 618 (cm<sup>-1</sup>). **HRMS (ESI-TOF)** *m/z*: [M + H]<sup>+</sup> Calcd for C<sub>9</sub>H<sub>9</sub>F<sub>3</sub>N<sub>3</sub>O<sub>8</sub>S<sub>2</sub> 407.9778; Found 407.9785. Mp = 127.4 – 129.0 °C.

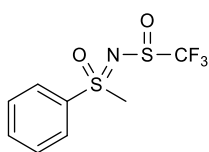

*N*-(trifluoromethylsulfaneylidene)-*S*-phenyl-*S*-methyl sulfoximine (**4a**). **2a** (0.3 mmol; 86 mg), 1 mL EtOAc, 1.1 equiv. of NaOCl·5H<sub>2</sub>O (0.3 mmol, 49 mg): Colorless oil (92%). **<sup>1</sup>H NMR** (500 MHz, Chloroform-*d*) δ 8.09 – 7.97 (m, 2H), 7.79 – 7.62 (m, 3H), 3.47 – 3.36 (m, 3H). **<sup>19</sup>F NMR** (471 MHz, Chloroform-*d*) δ -80.54, -80.89. **<sup>13</sup>C NMR** (126 MHz, Chloroform-*d*) δ 138.39, 137.83, 135.21, 135.00, 130.23, 130.09, 128.32, 127.54, 124.08 (C-F, <sup>1</sup>*J*<sub>C-F</sub> = 333.8 Hz), 47.46, 47.16. **IR (neat)**: ν 3067, 3015, 1582, 1448, 1405, 1325, 1231, 1175, 1151, 1090, 1030, 1013, 993, 786, 738, 683 (cm<sup>-1</sup>). **HRMS (ESI-TOF)** *m/z*: [M + H]<sup>+</sup> Calcd for C<sub>8</sub>H<sub>9</sub>F<sub>3</sub>NO<sub>2</sub>S<sub>2</sub> 272.0021; Found 272.0016.

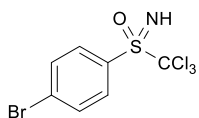

*S*-(4-bromophenyl)-*S*-trichloromethyl sulfoximine (**5x**). **2x** (0.3 mmol; 199 mg), 1 mL H<sub>2</sub>O, 4 equiv. of NaOCl·5H<sub>2</sub>O (1.2 mmol, 197 mg), GP1: White solid (98 mg, 97%). **<sup>1</sup>H NMR** (500 MHz, Chloroform-*d*) δ 8.05 – 8.00 (m, 2H), 7.80 – 7.76 (m, 2H). Unknown minor impurities are present due to decomposition and the inability to purify the product with chromatographic means. **<sup>13</sup>C NMR** (126 MHz, Chloroform-*d*) δ 132.94, 132.84, 132.15, 128.93, 127.82. **IR (neat)**: ν 3094, 1579, 1393, 1352, 1324, 1298, 1202, 1168, 1136, 1088, 1067, 1012, 820, 786, 754, 727, 700, 643 (cm<sup>-1</sup>). **HRMS (ESI-TOF)** *m/z*: [M + H]<sup>+</sup> Calcd for C<sub>7</sub>H<sub>6</sub>BrCl<sub>3</sub>NOS 335.8414; Found 335.8415. Mp = 168.7 – 171.9 °C (decomposition – changes to a dark-brown solid).

# Copies of $^1\text{H}$ NMR, $^{19}\text{F}$ NMR and $^{13}\text{C}$ NMR spectra

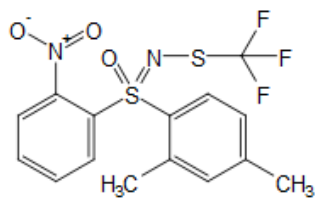

**2ab**

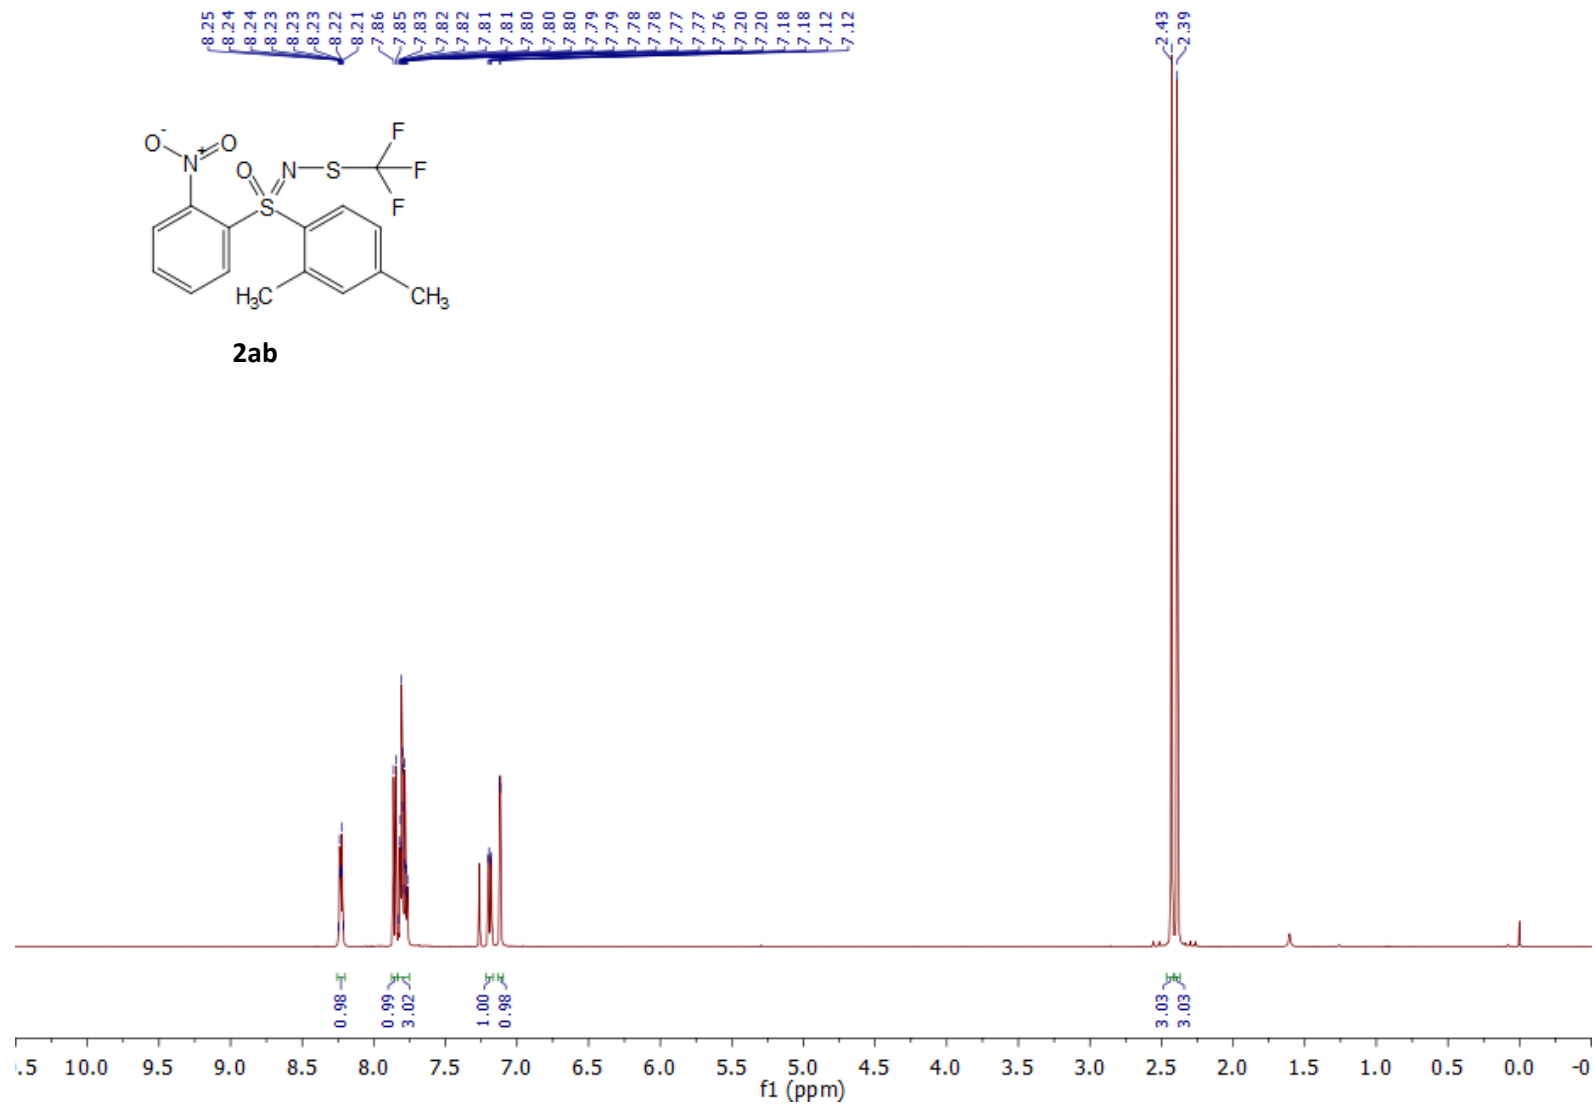





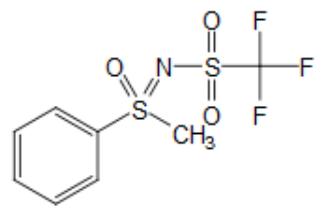

3a

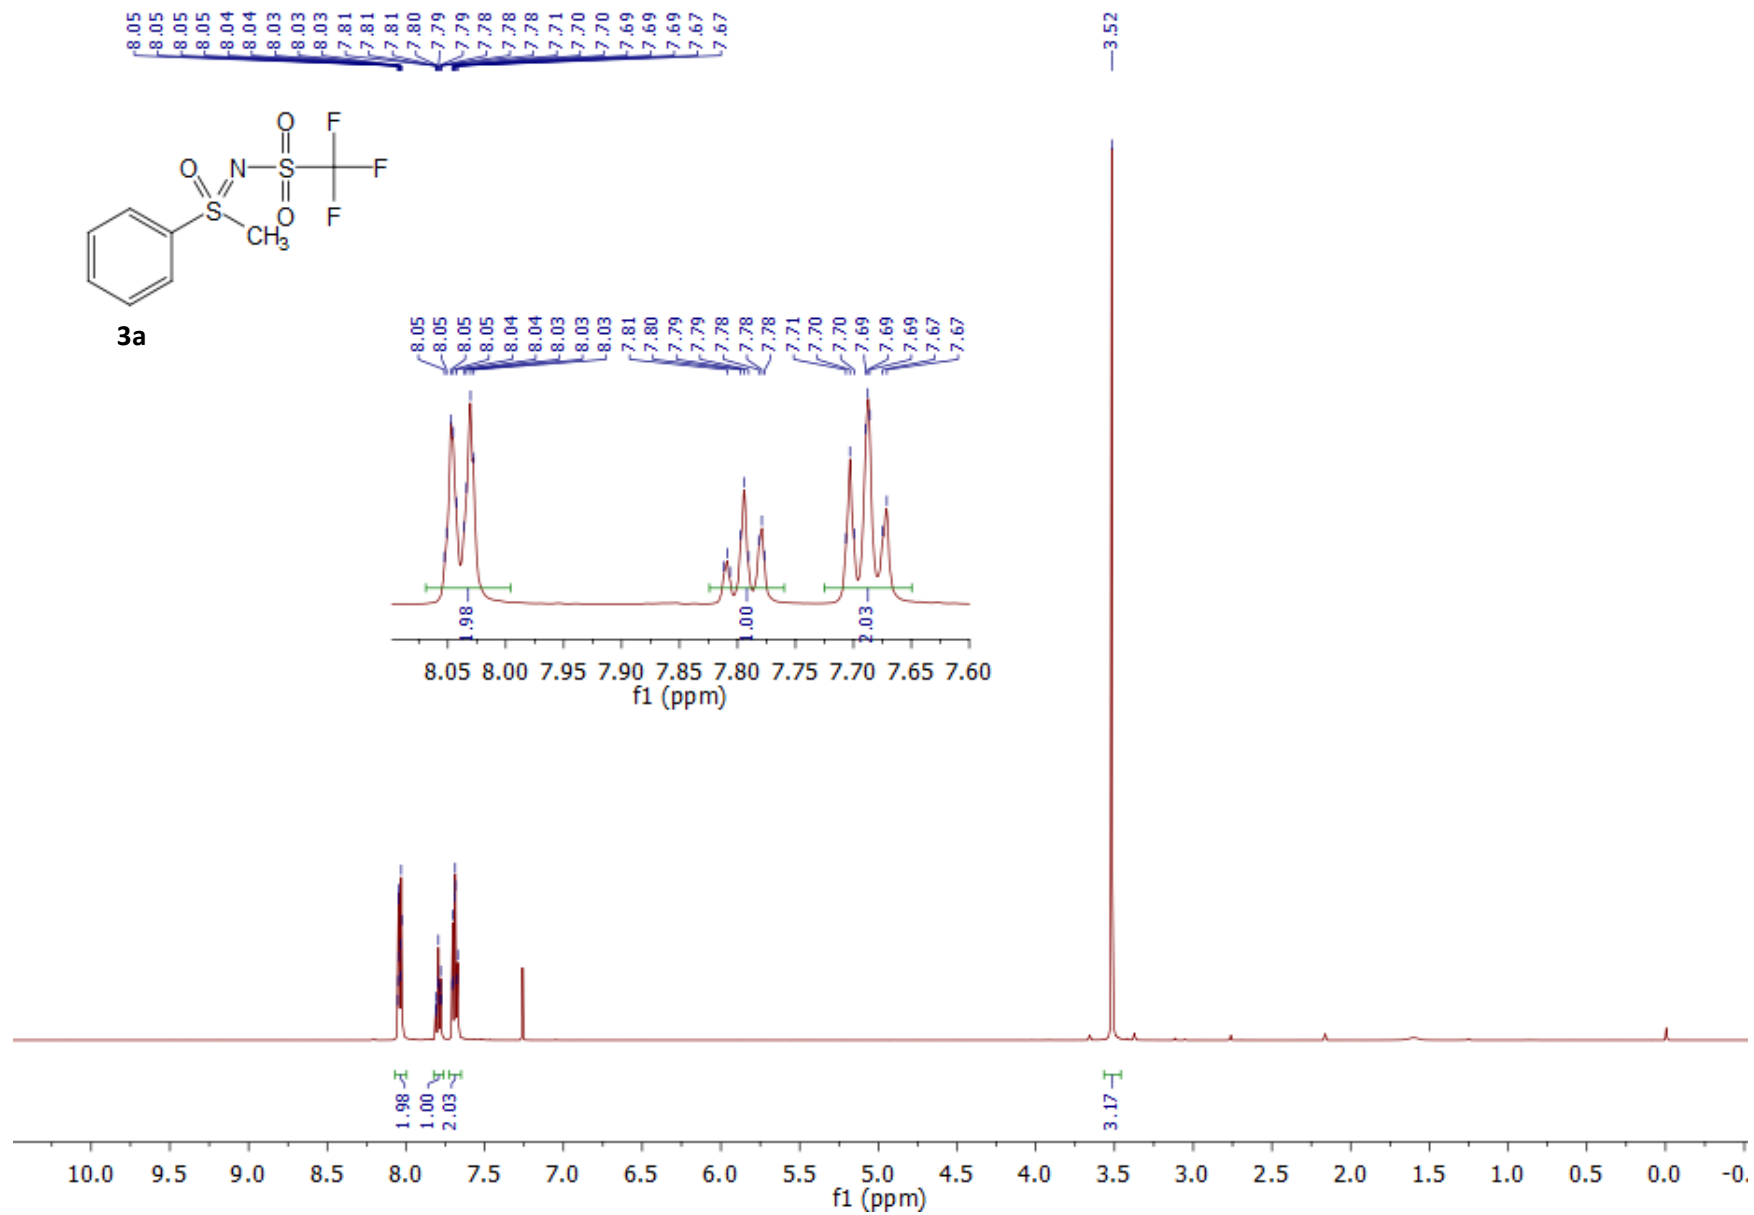

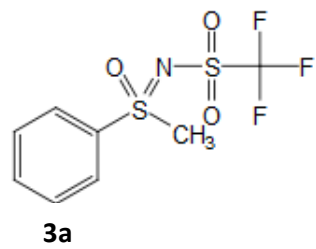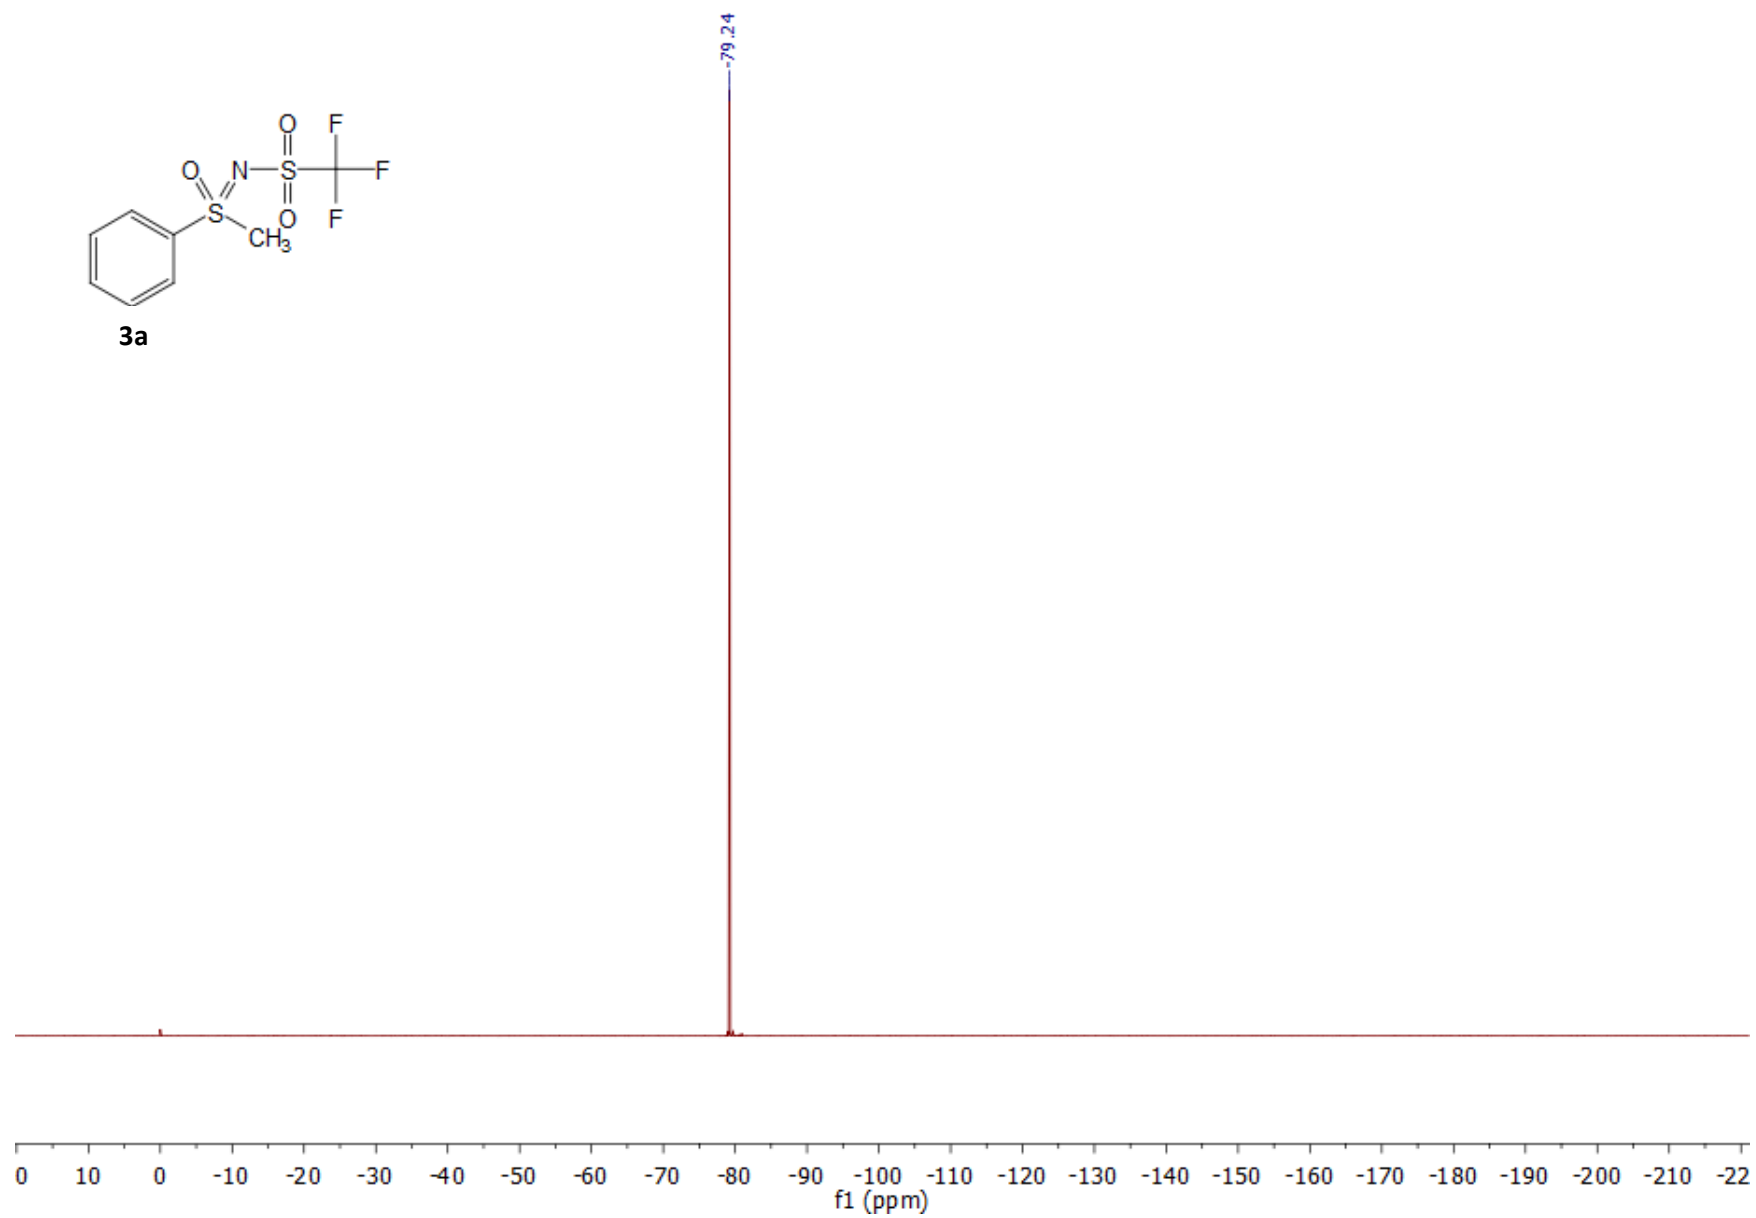

S23

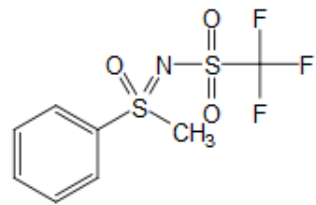

3a

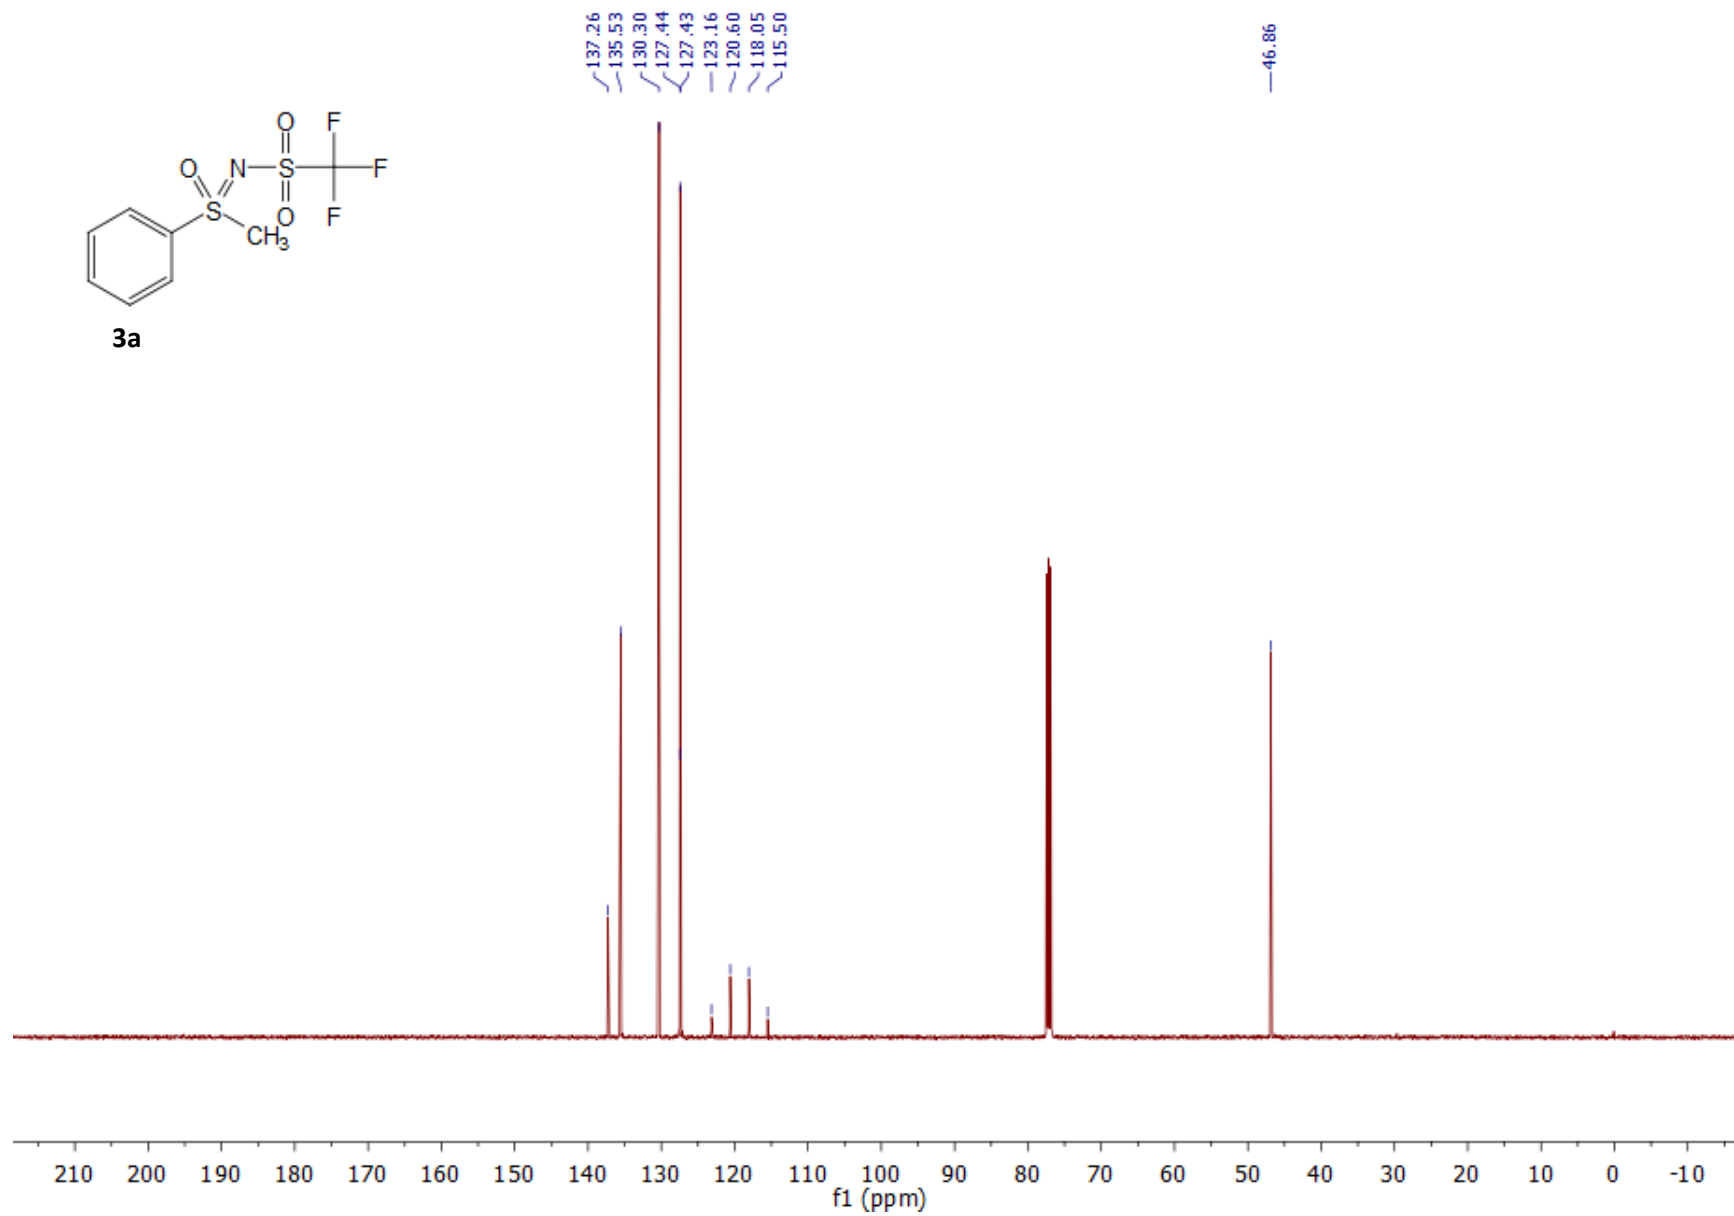



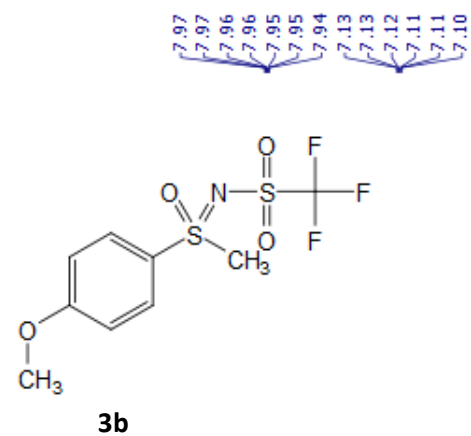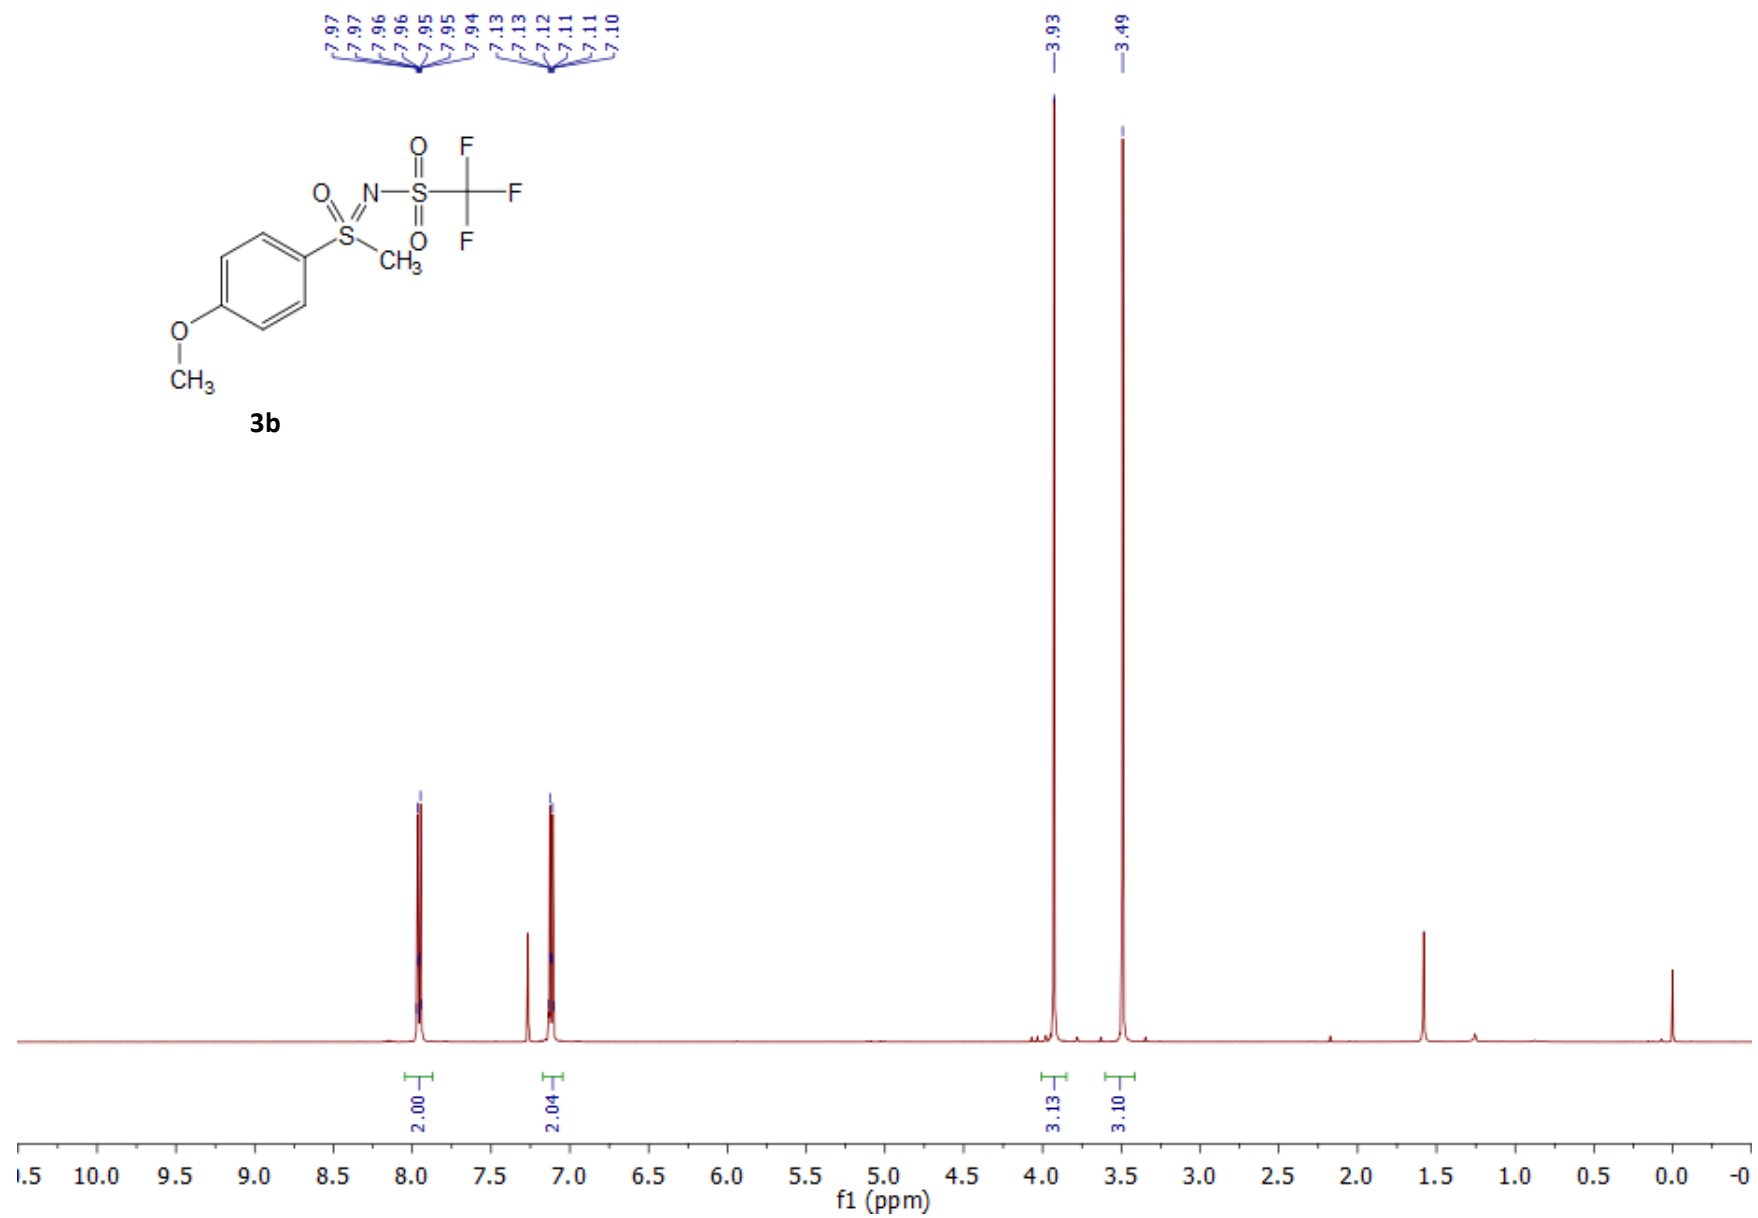

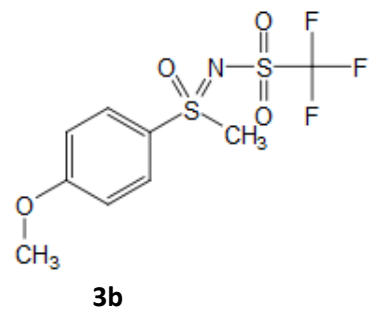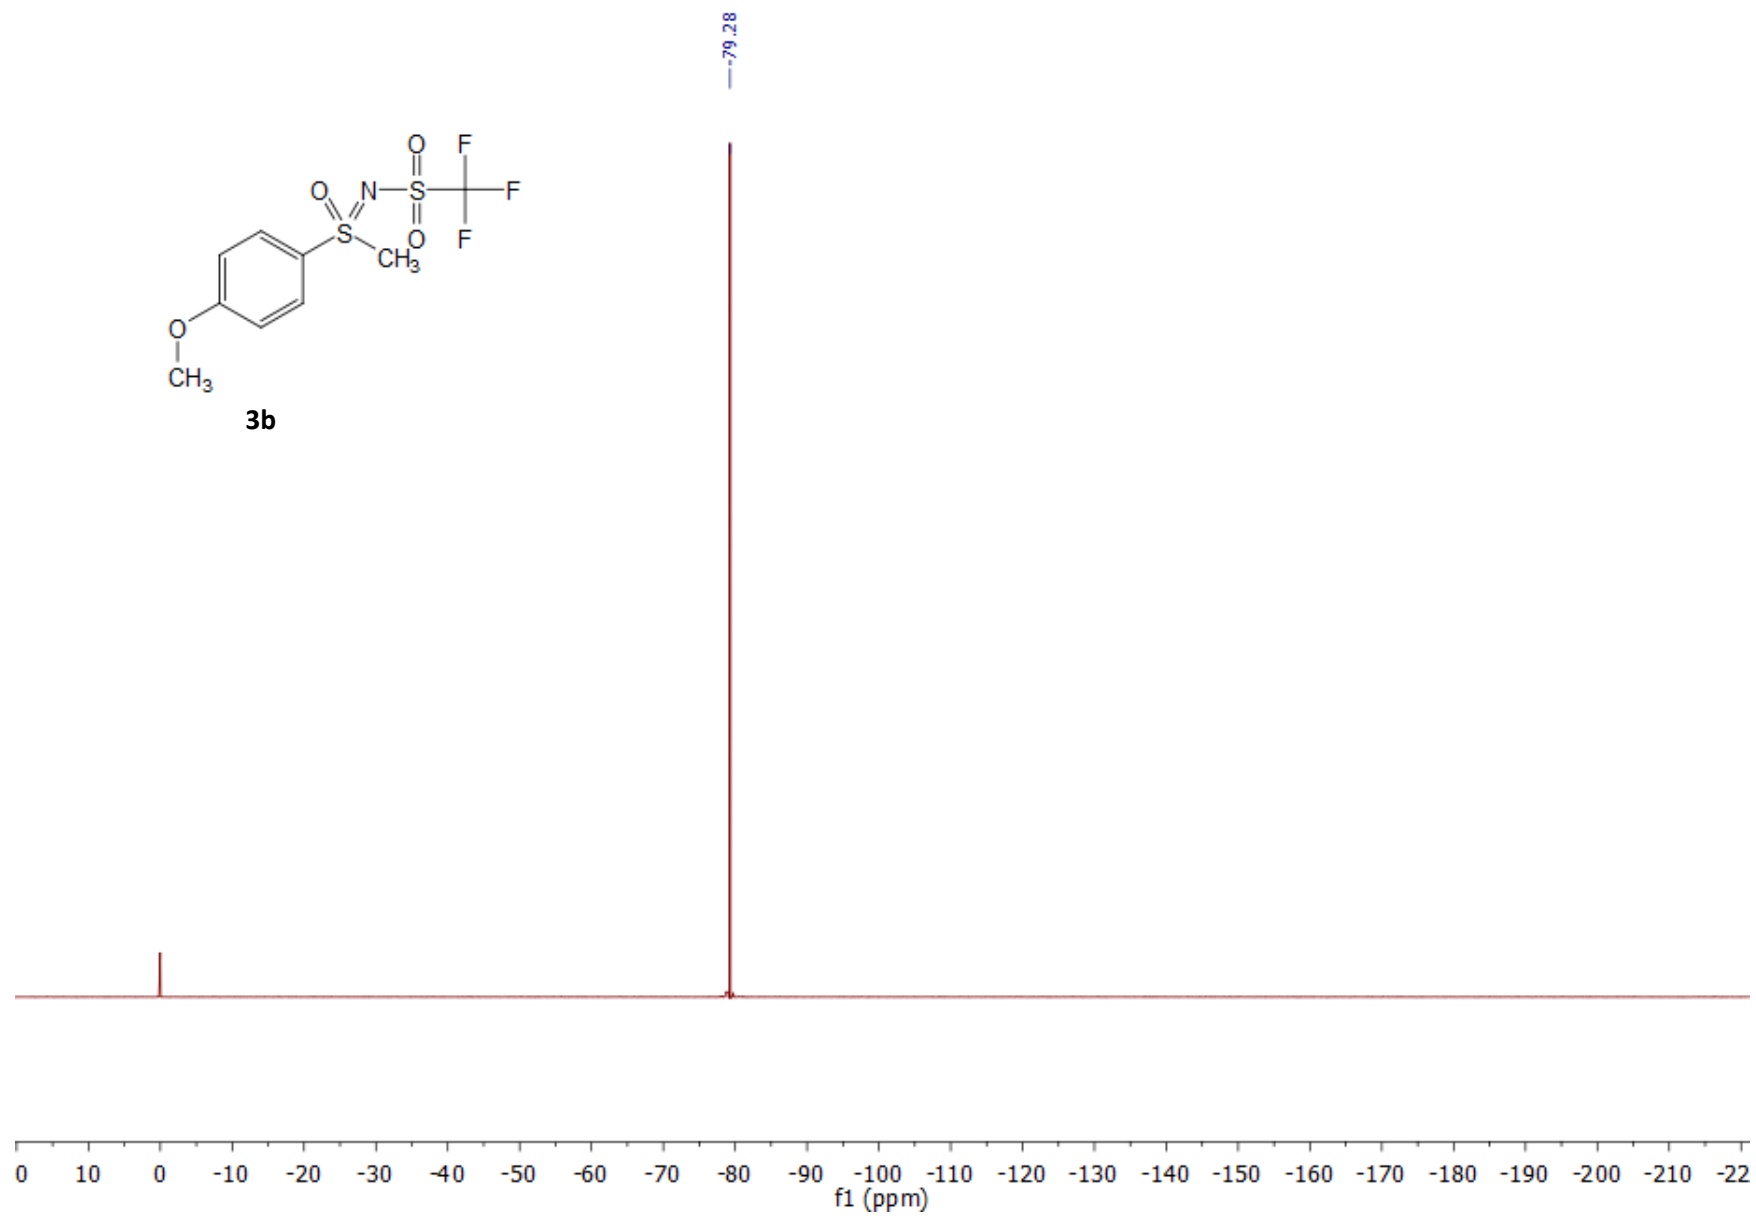

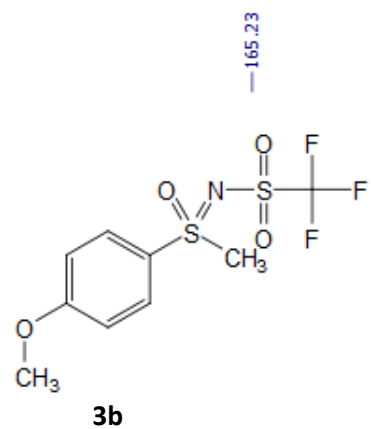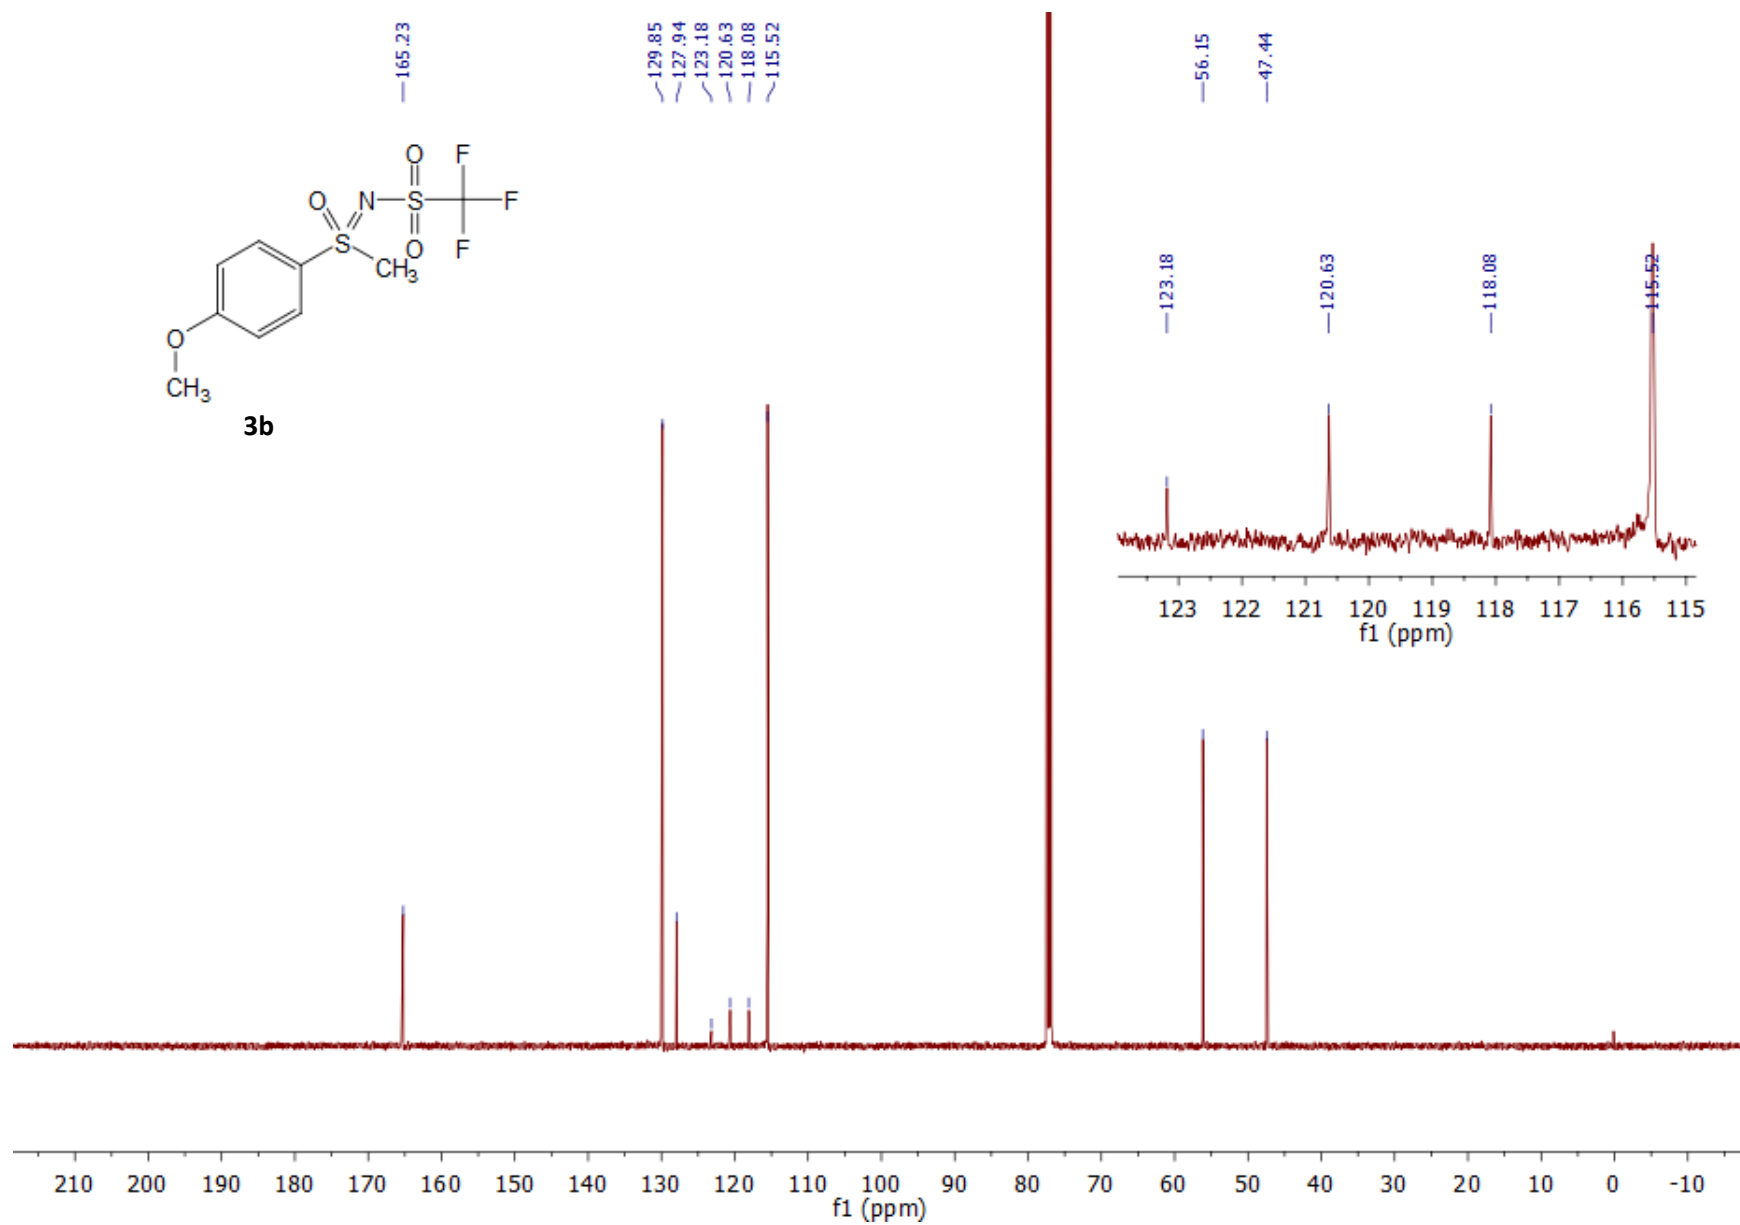

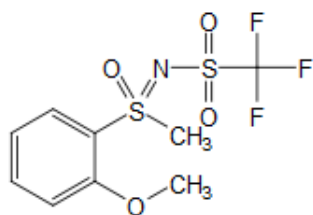

3c

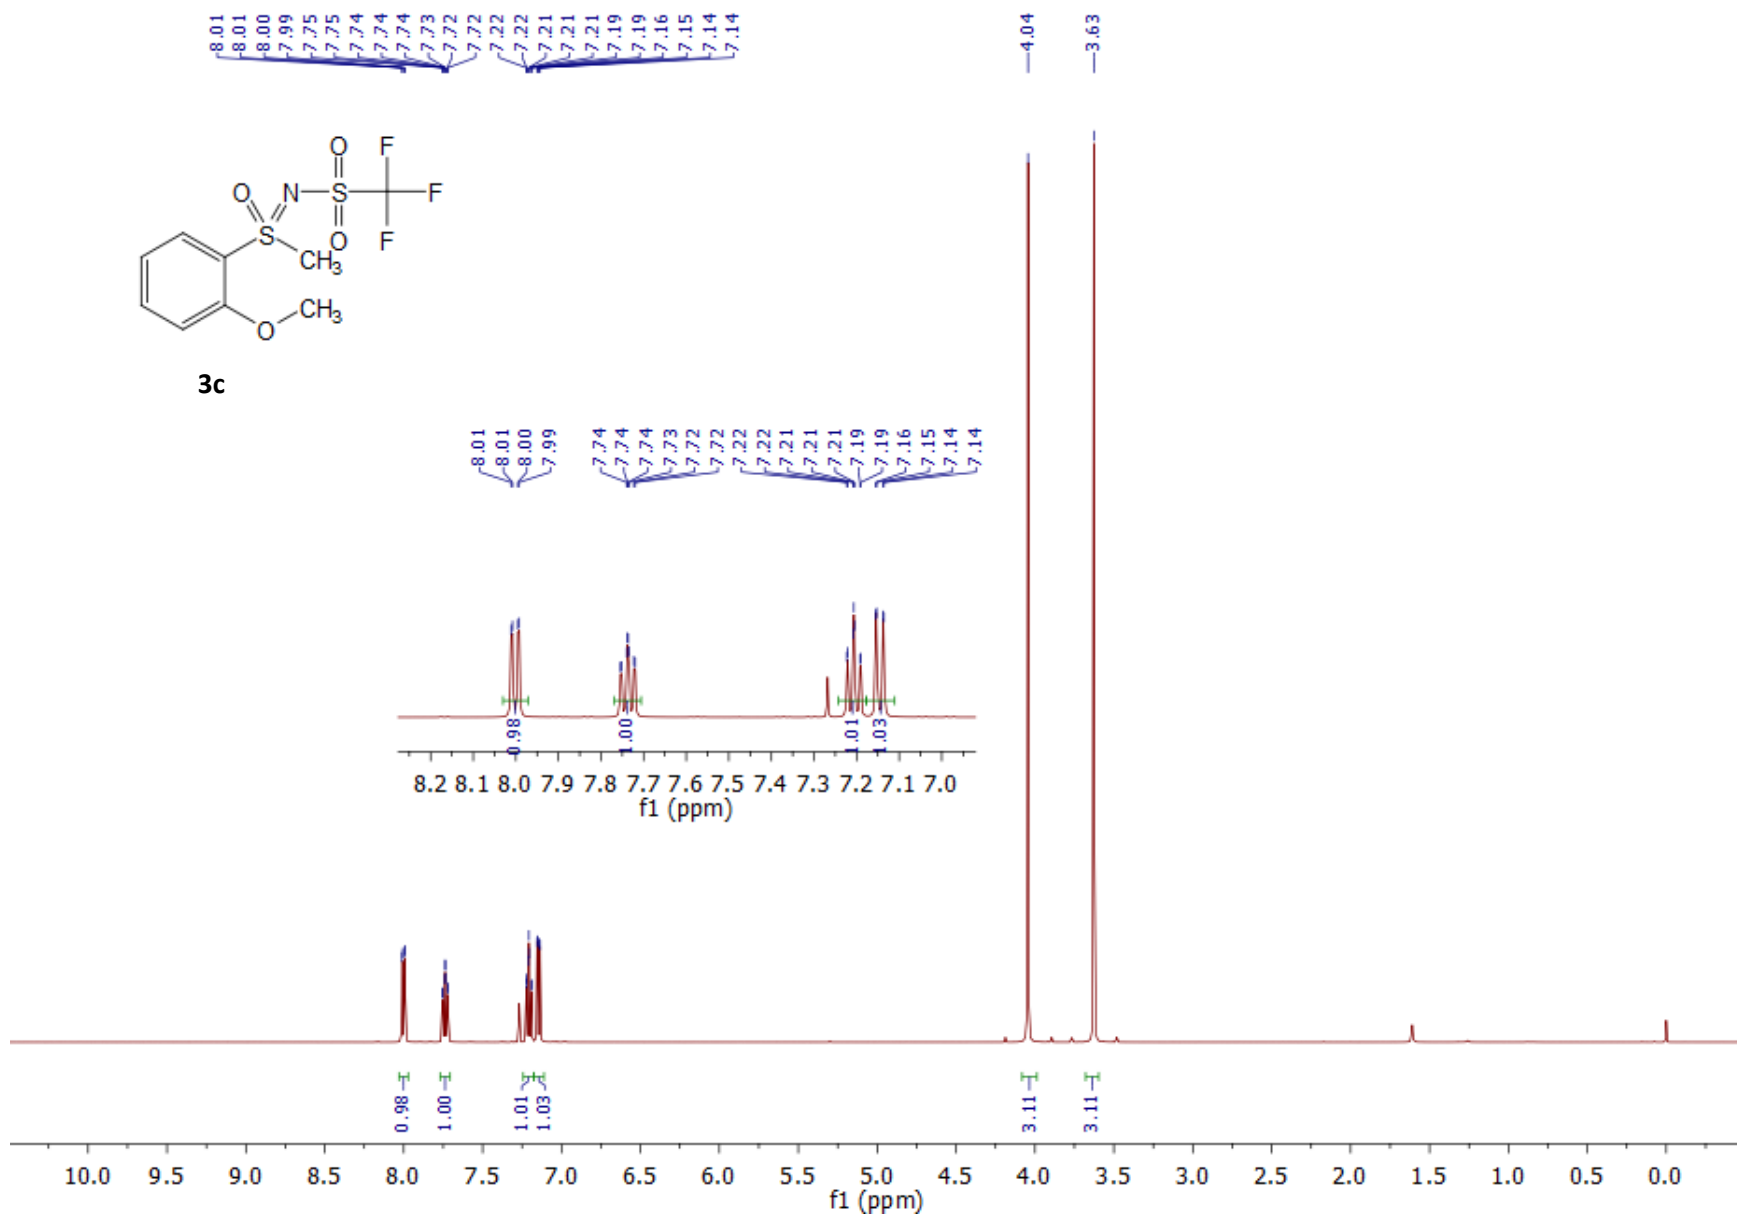



**3c**

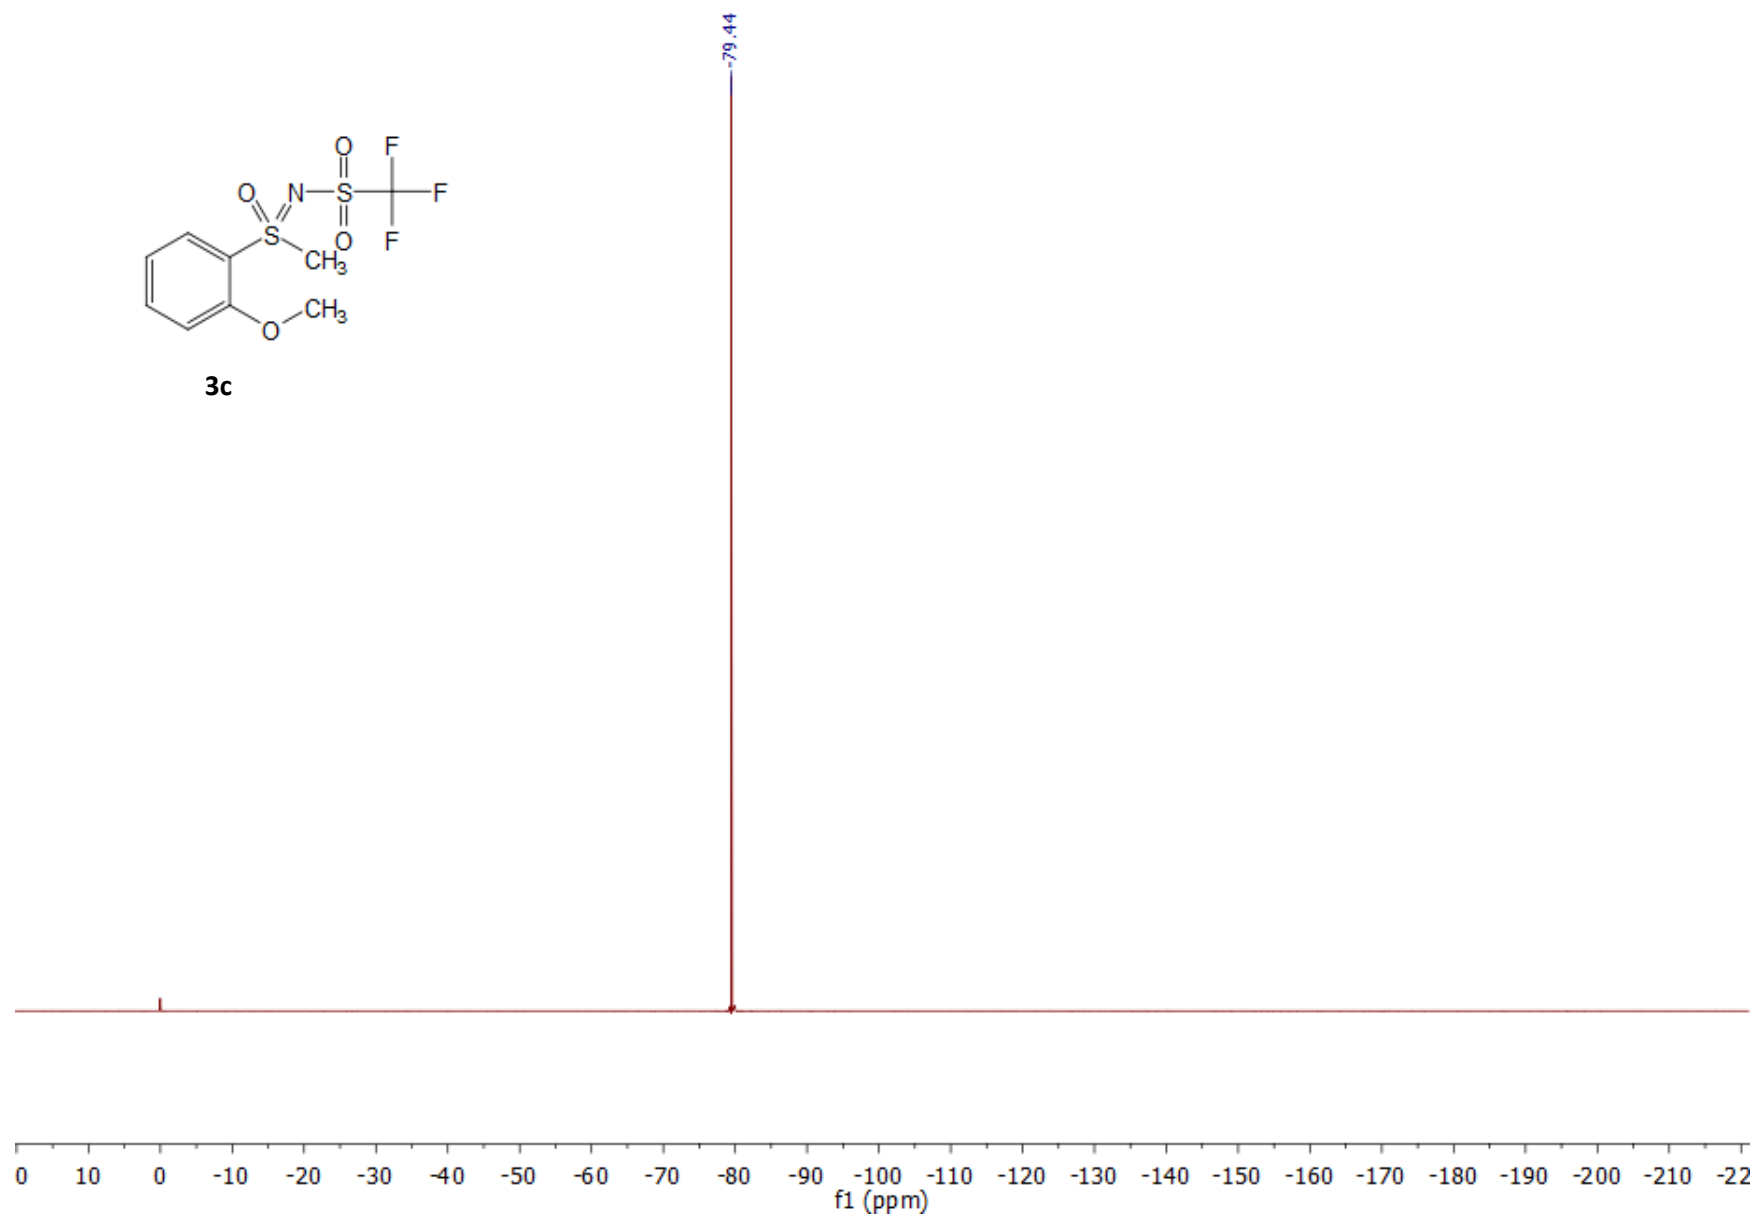

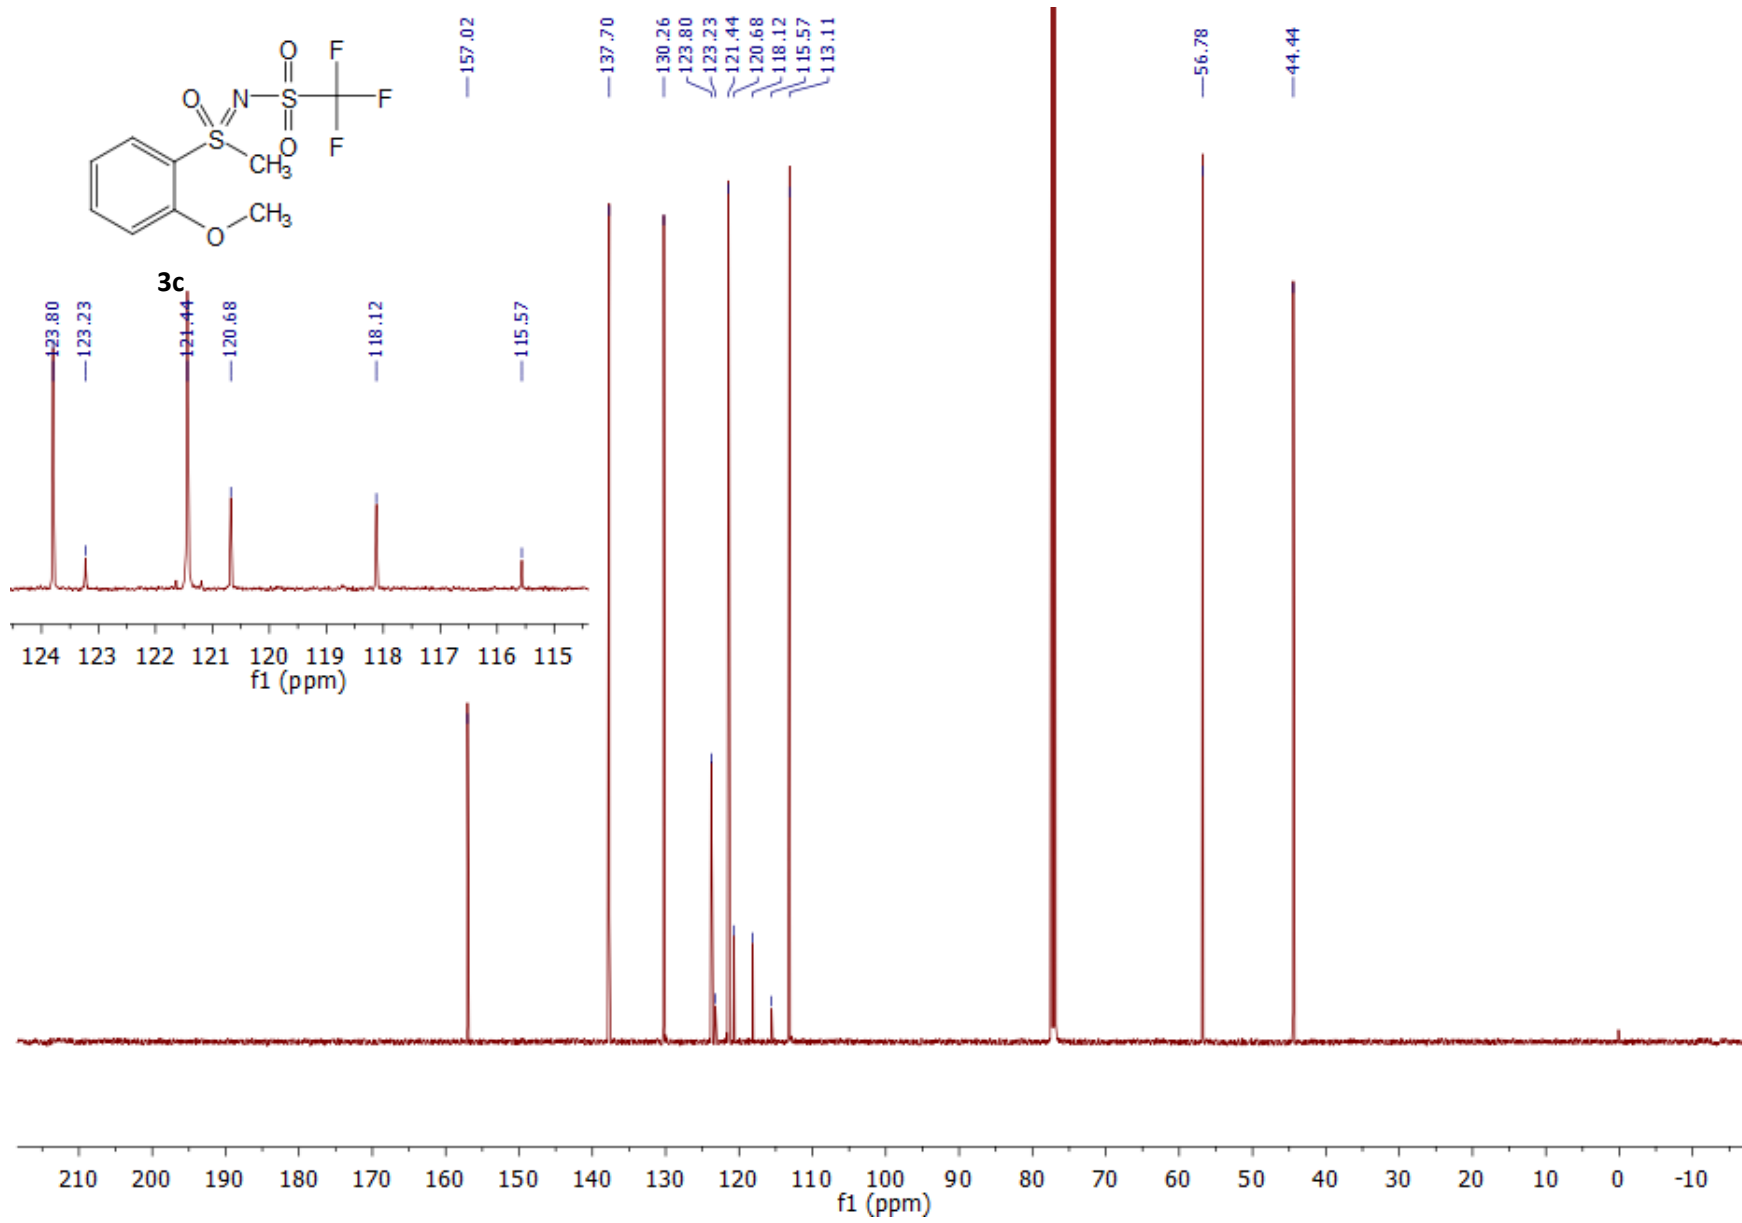



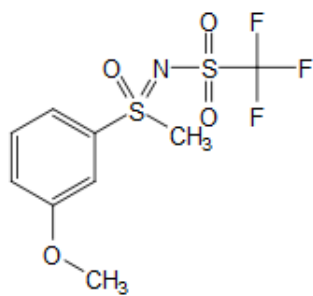

**3d**

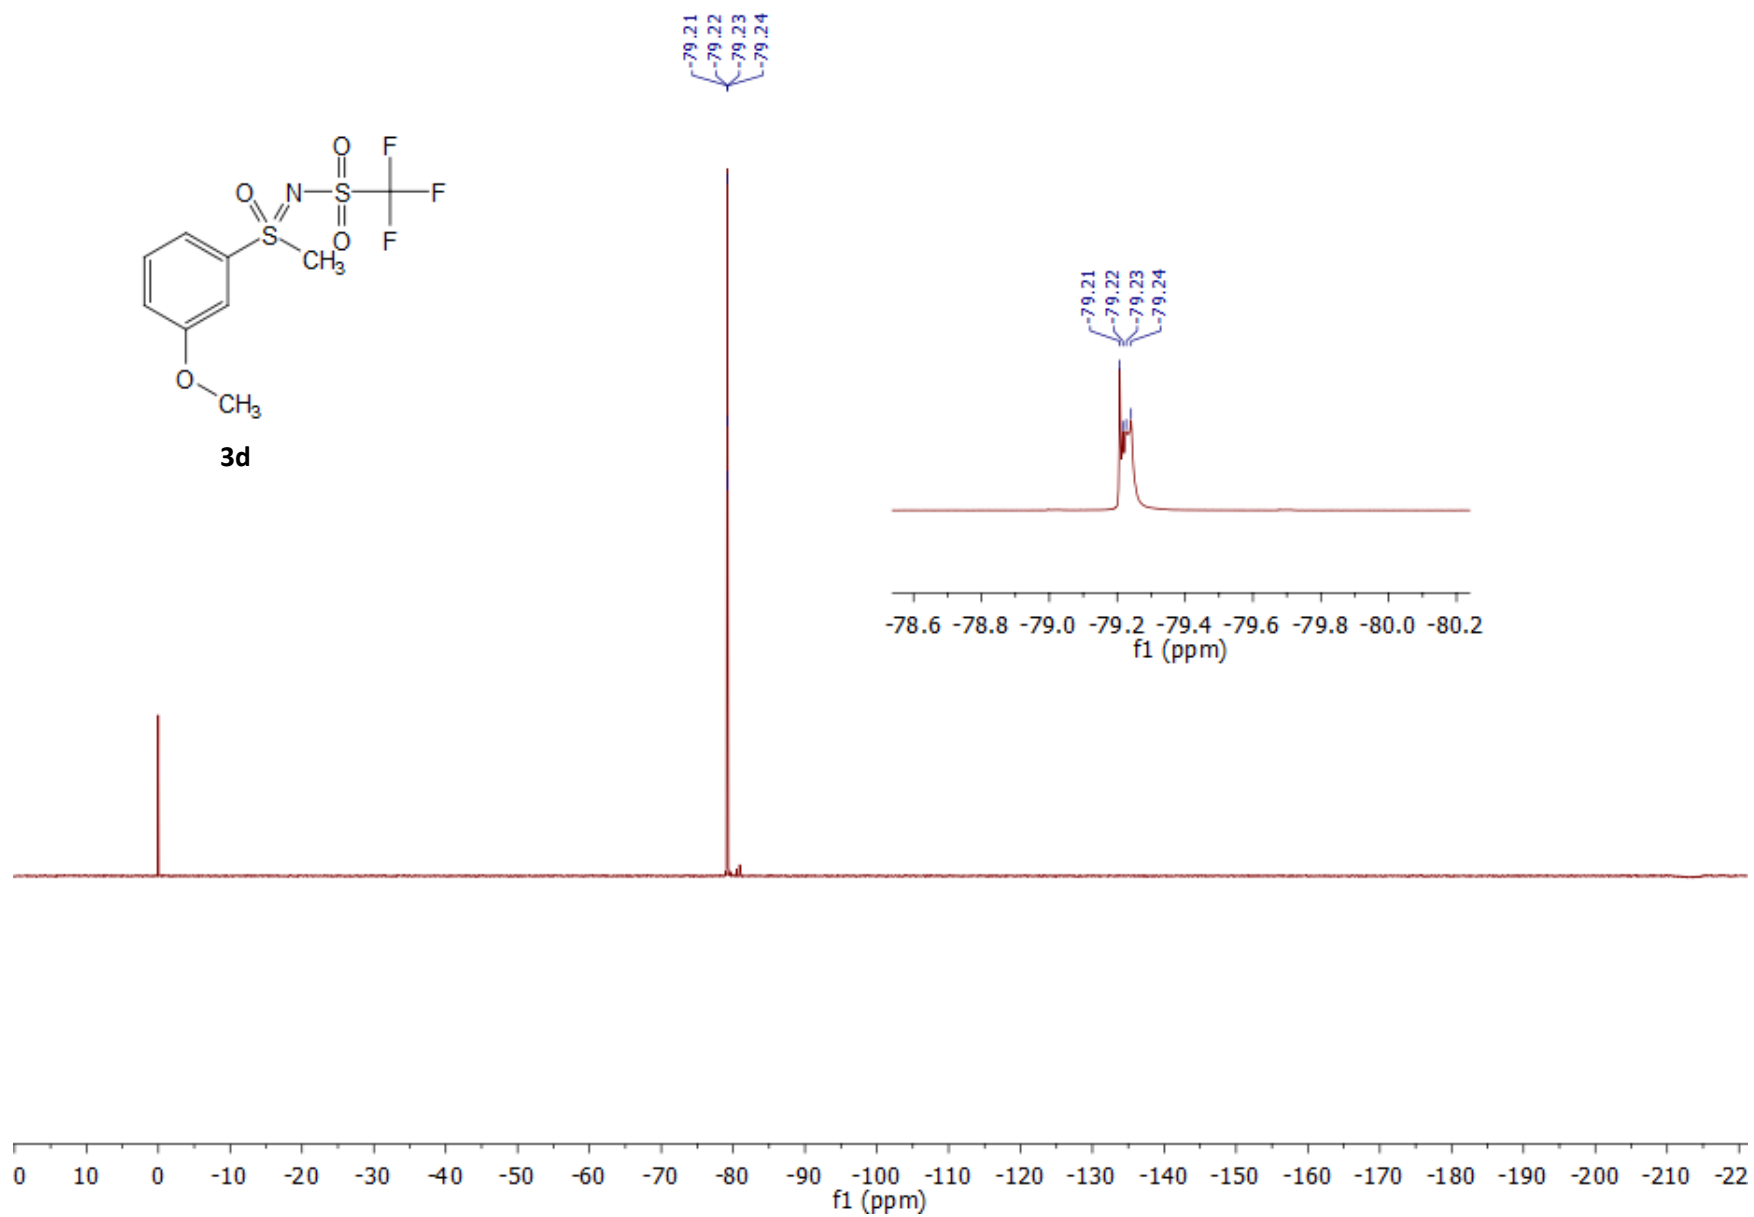





**3d**

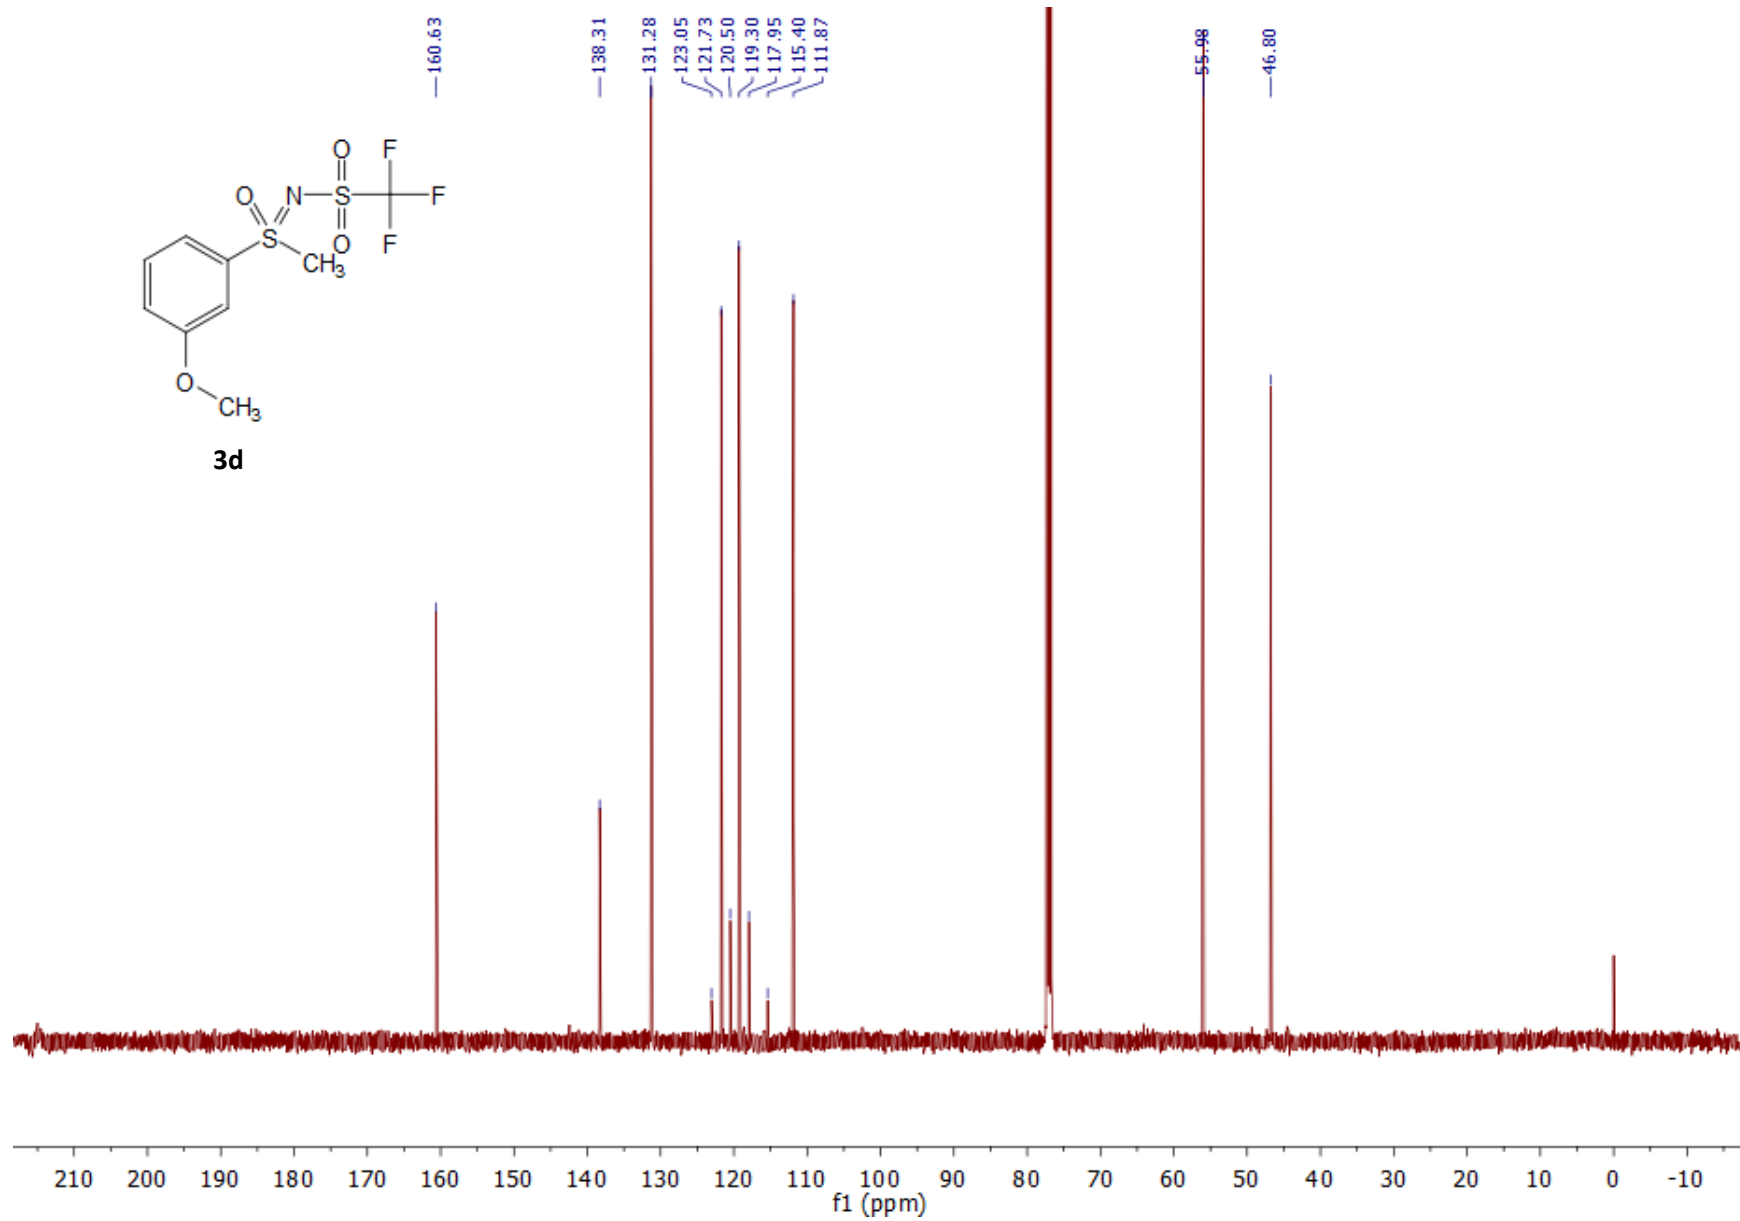

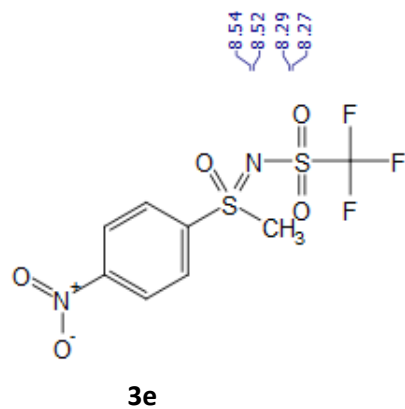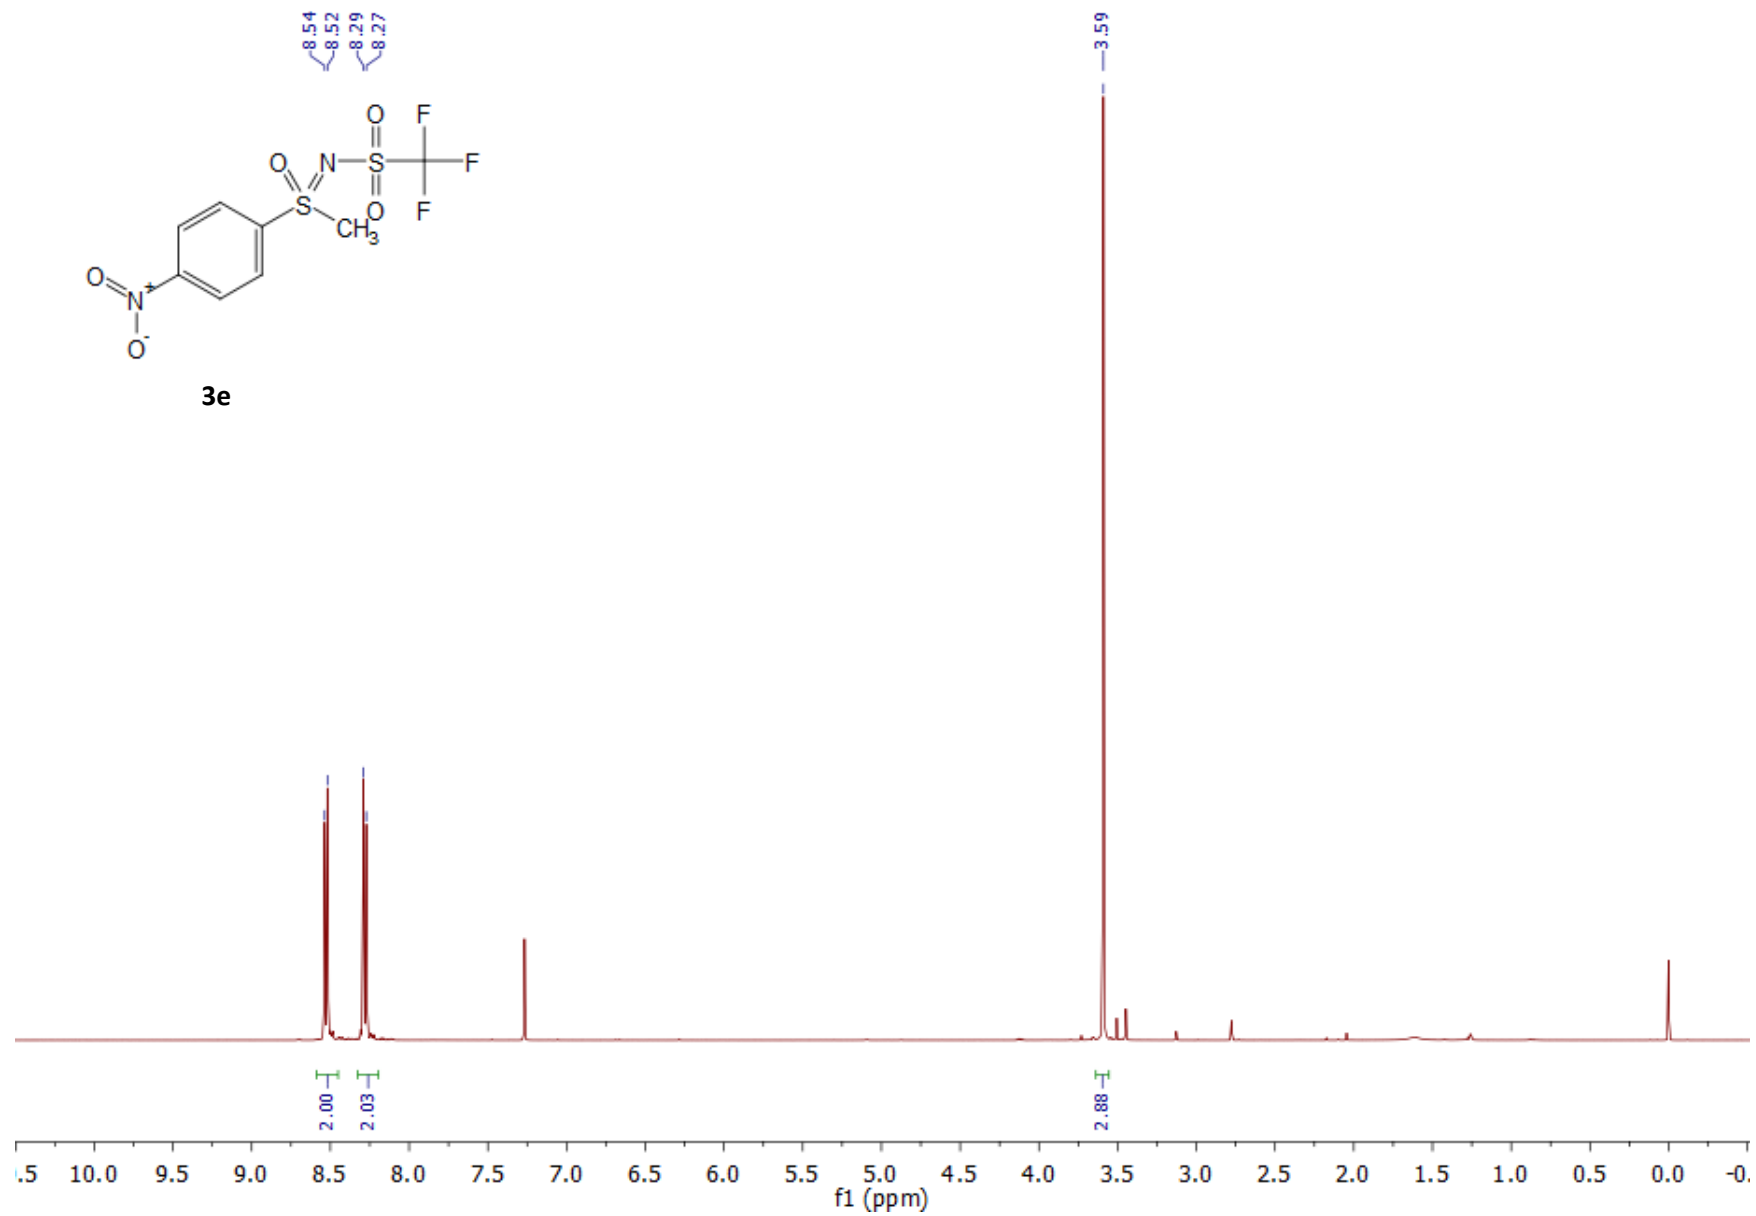

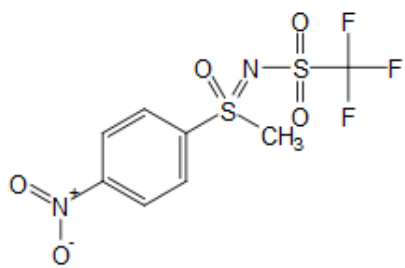

**3e**

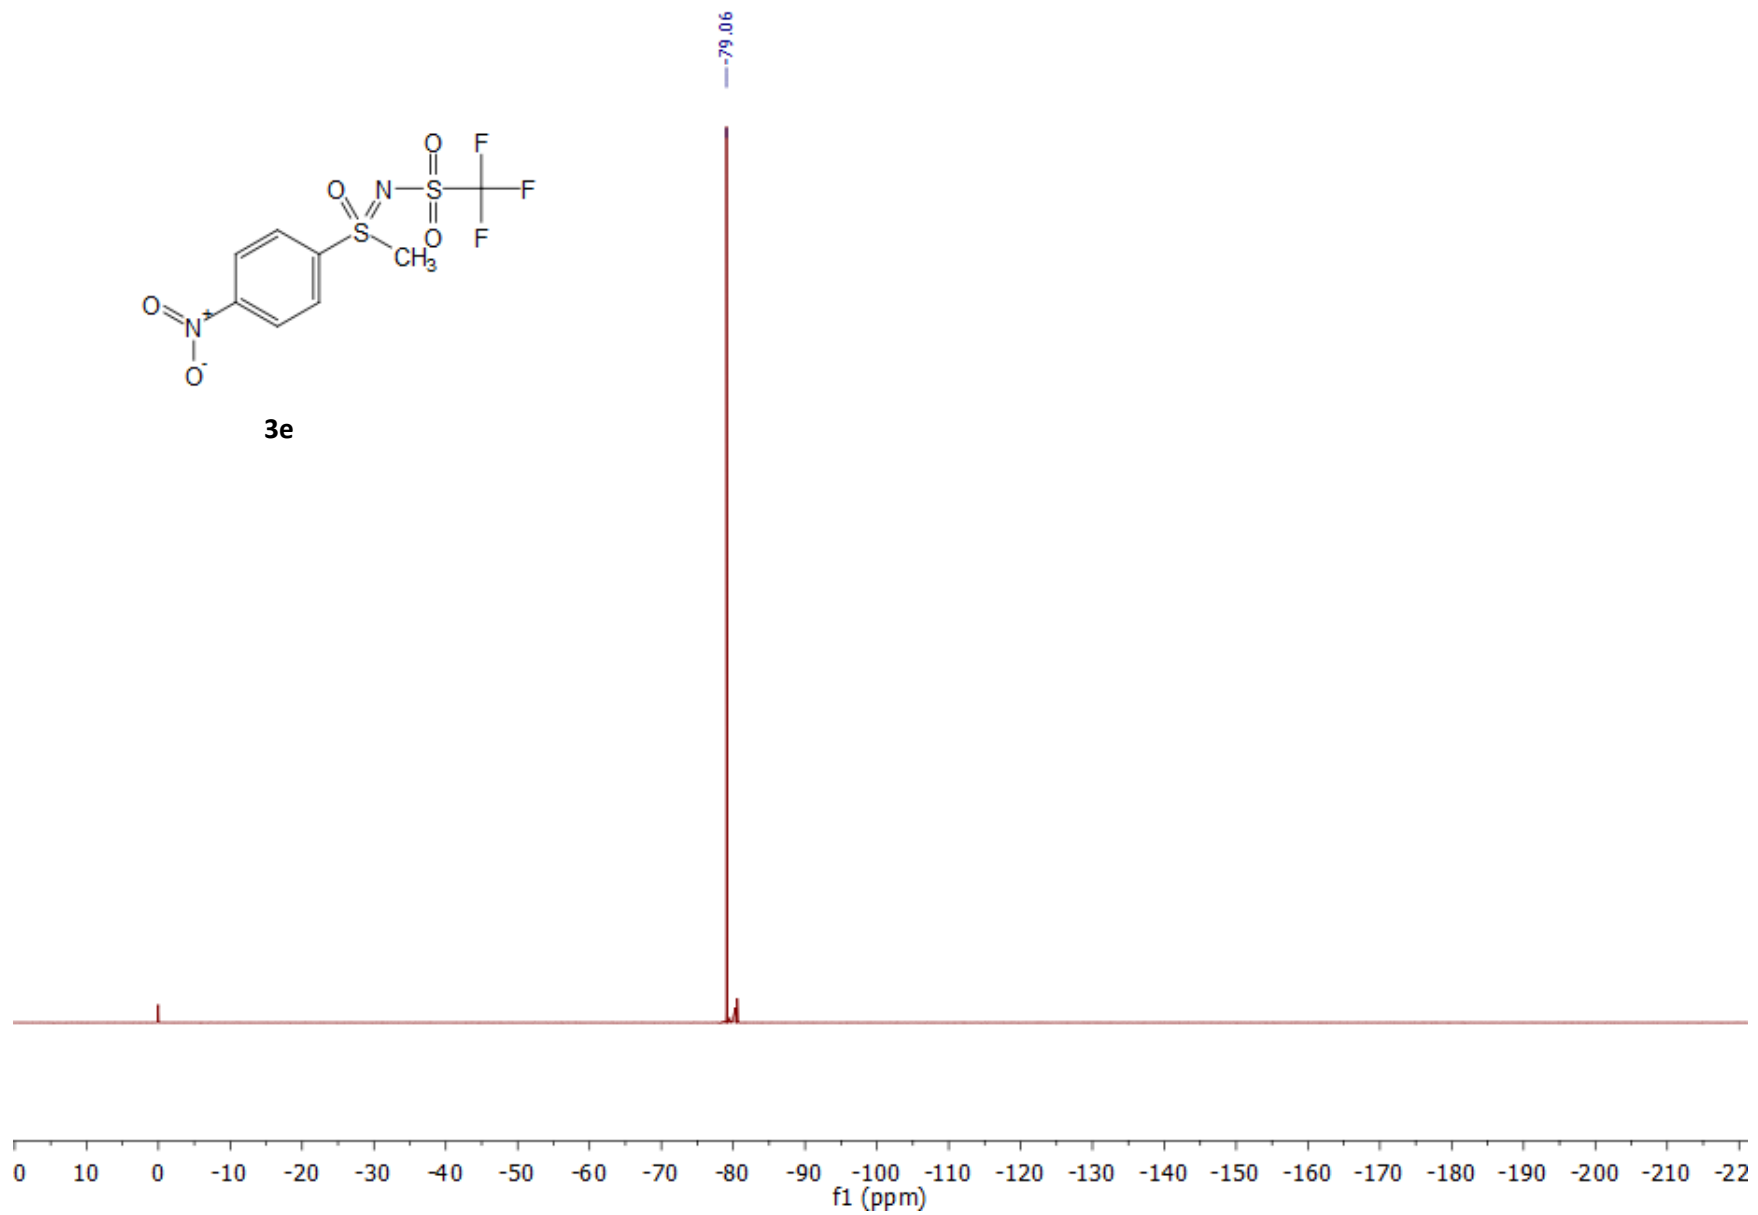



3e

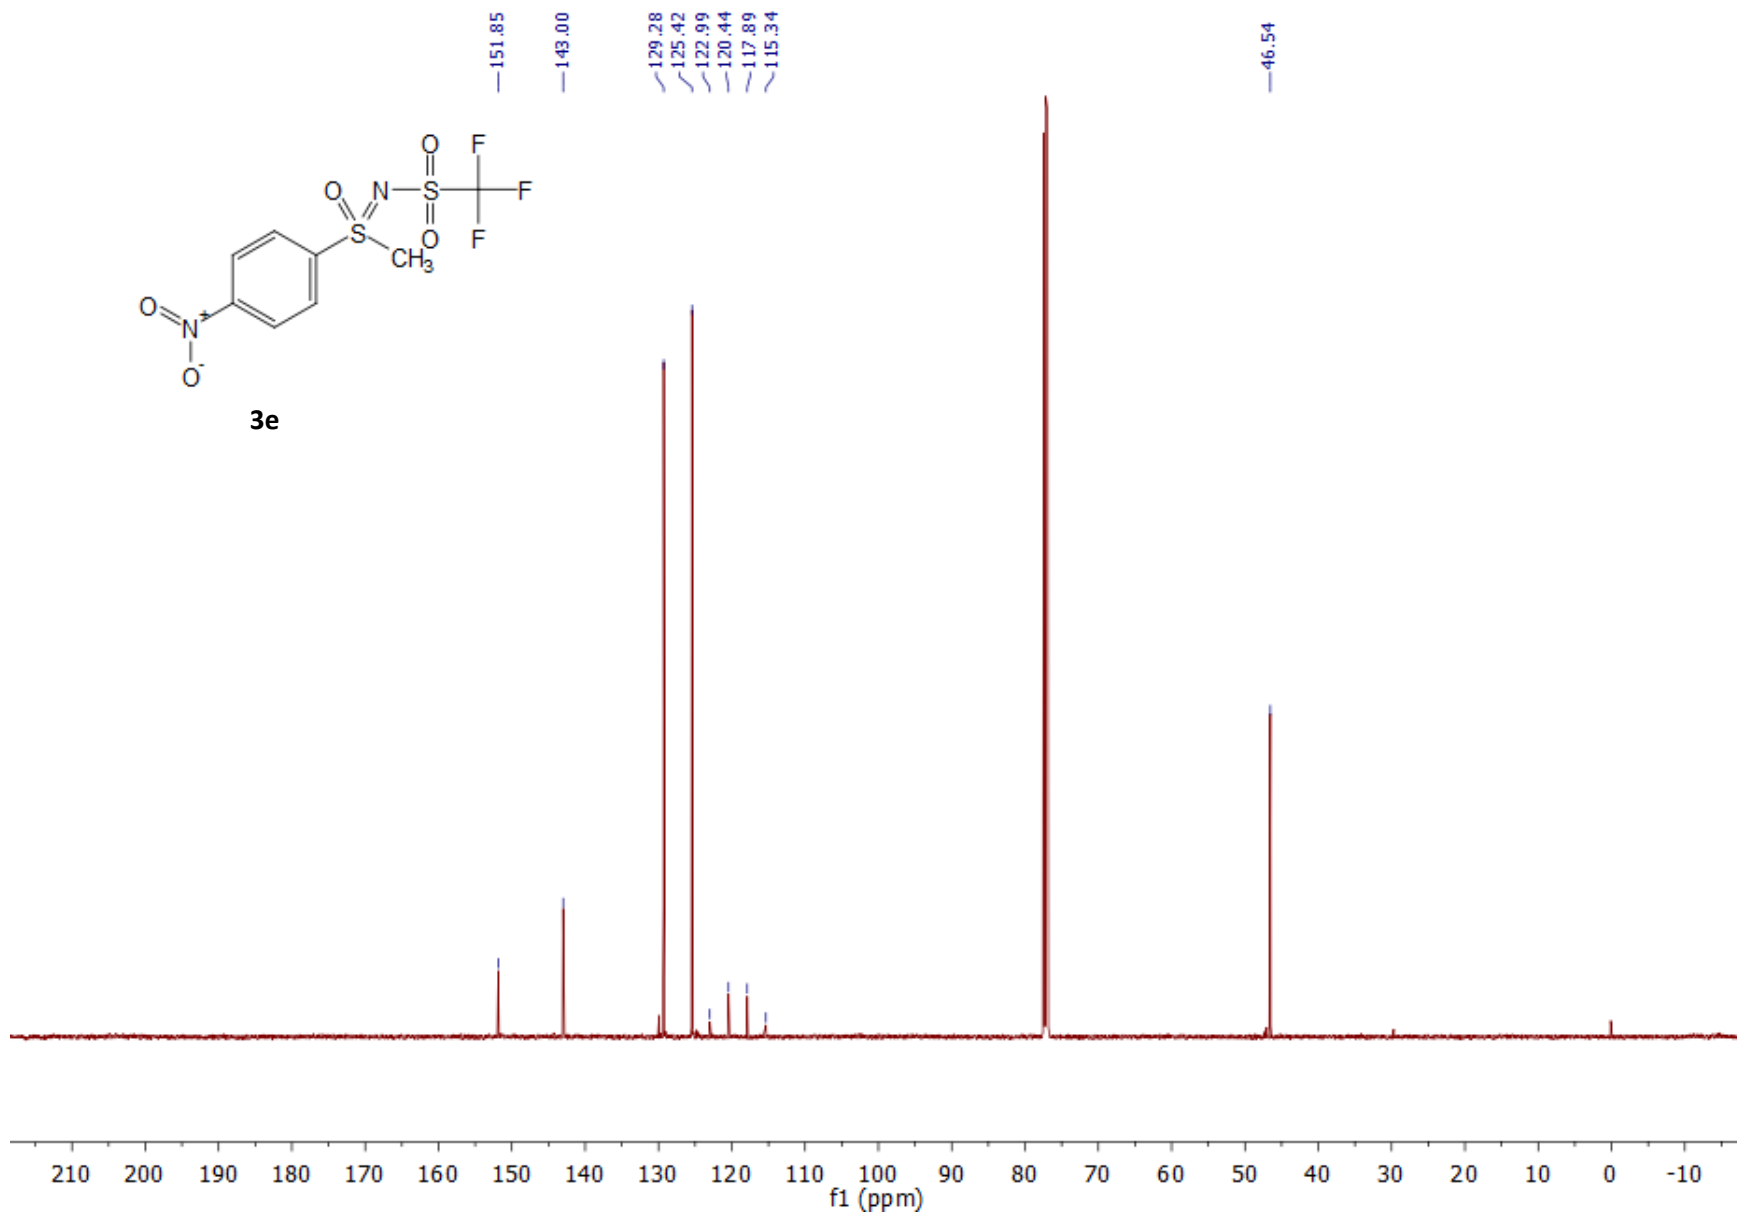

8.11  
8.11  
8.11  
8.10  
8.09  
8.09  
8.08  
8.08  
8.07  
8.07  
8.06  
8.06  
7.22  
7.21  
7.21  
7.21  
7.20  
7.20  
7.19  
7.19  
7.18  
7.18  
7.18  
7.15  
7.14  
7.13  
7.13  
7.12  
7.11  
7.11

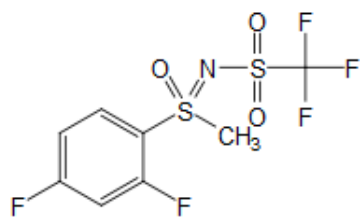

**3f**

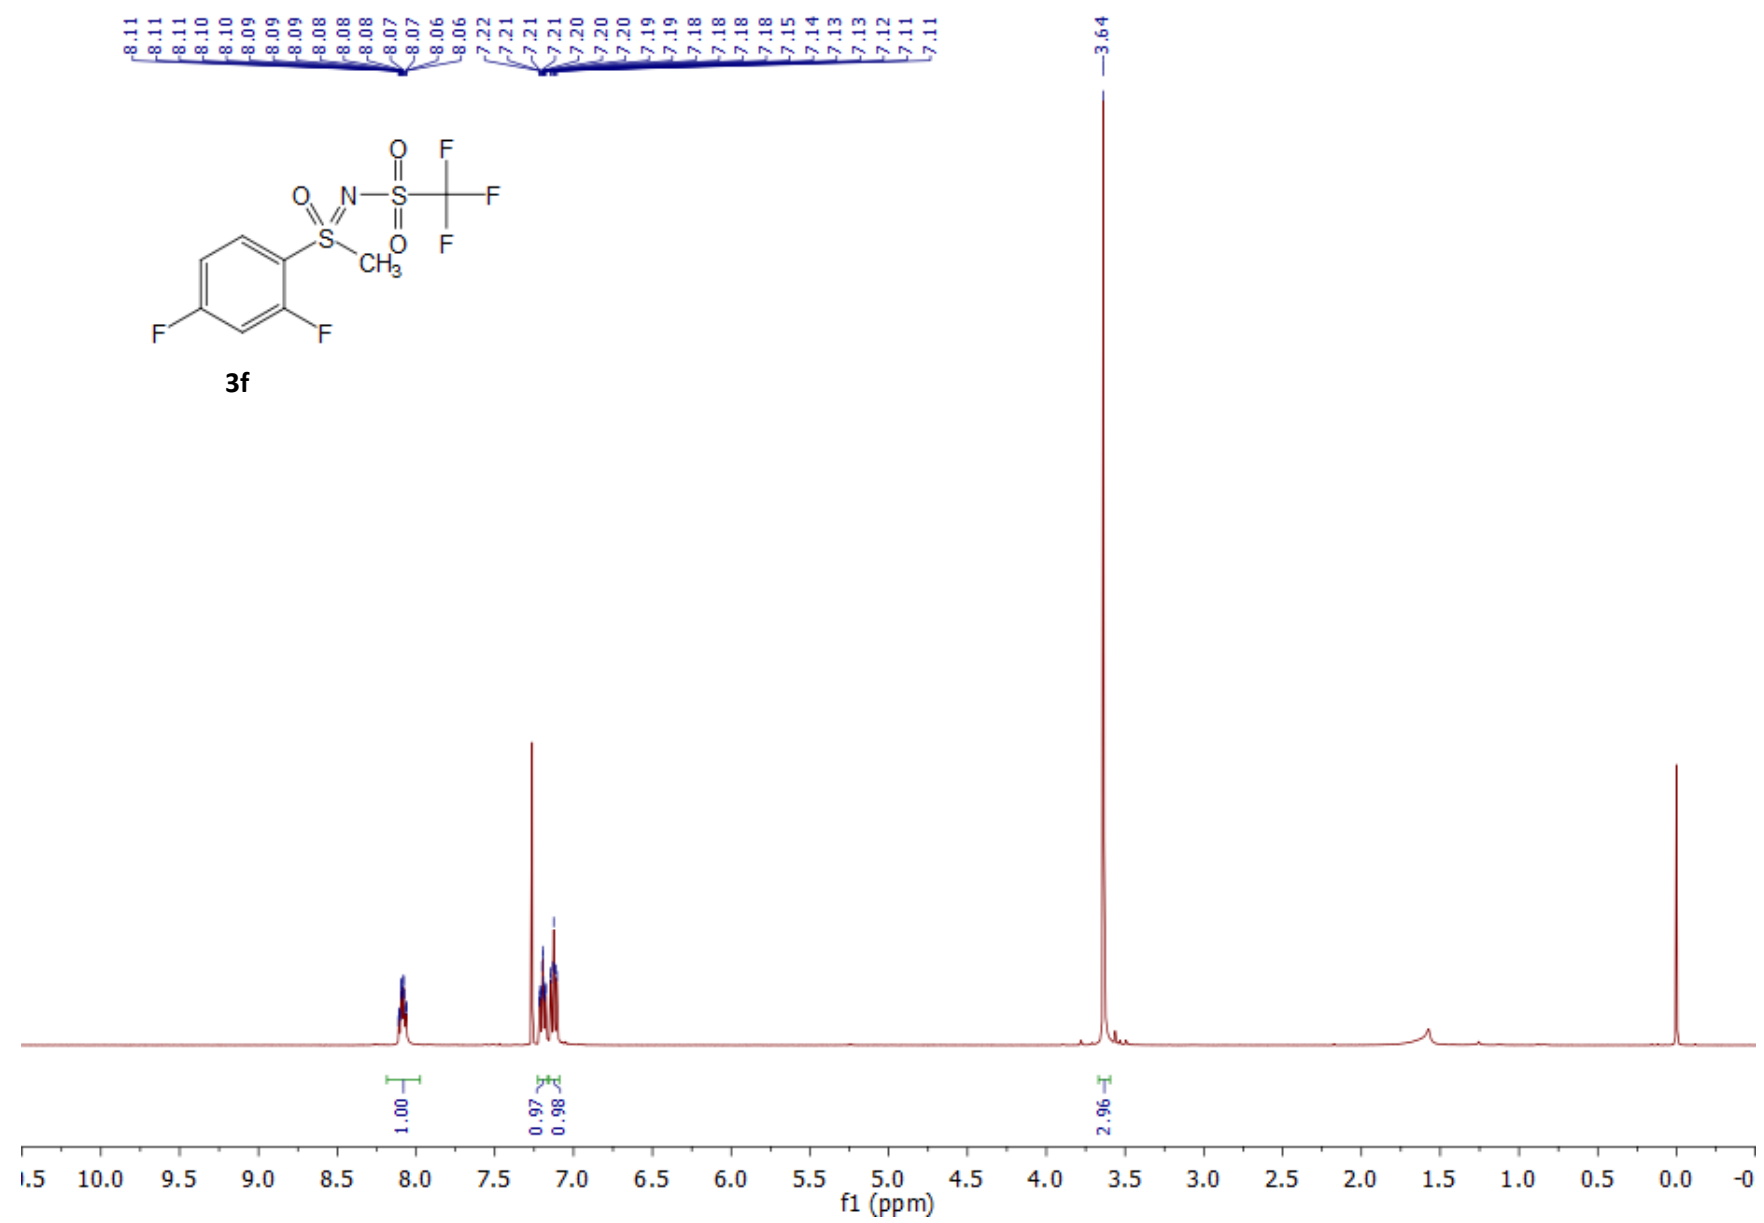

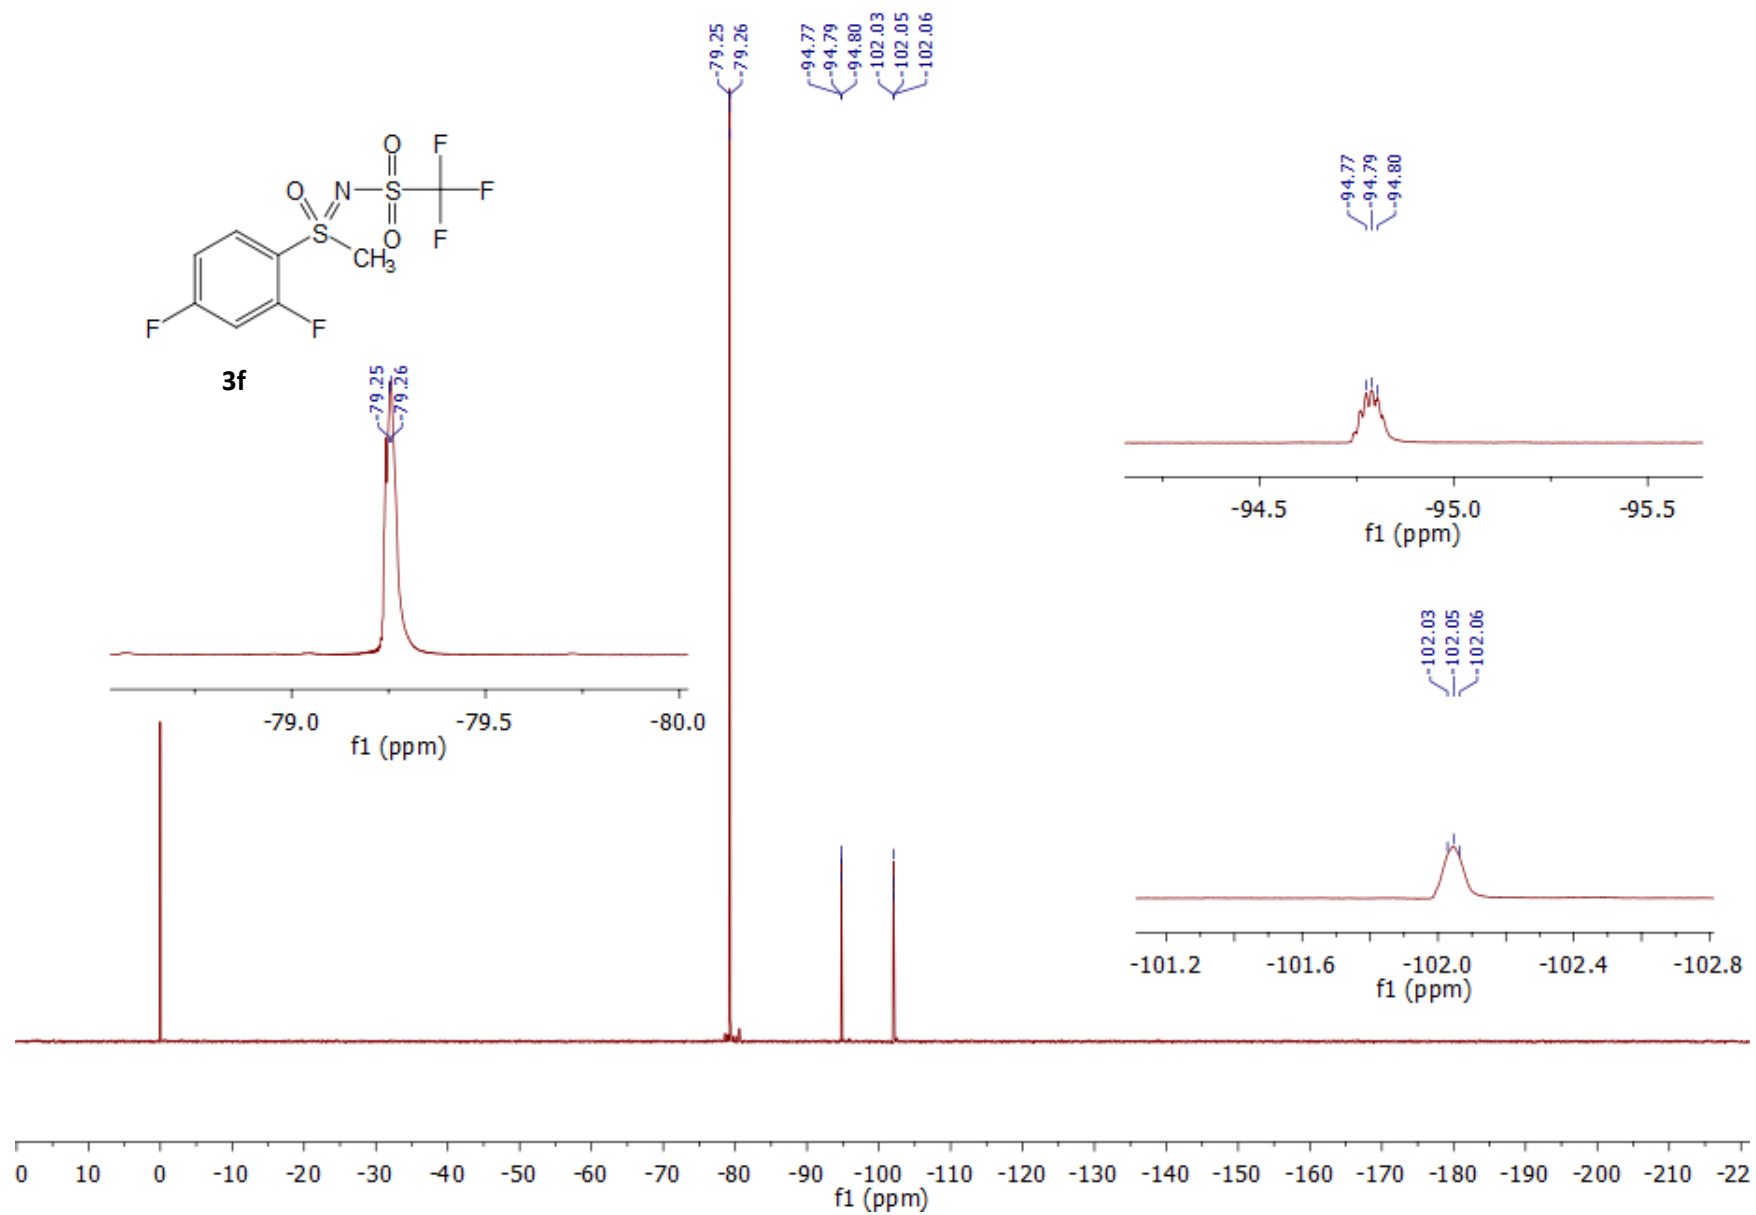

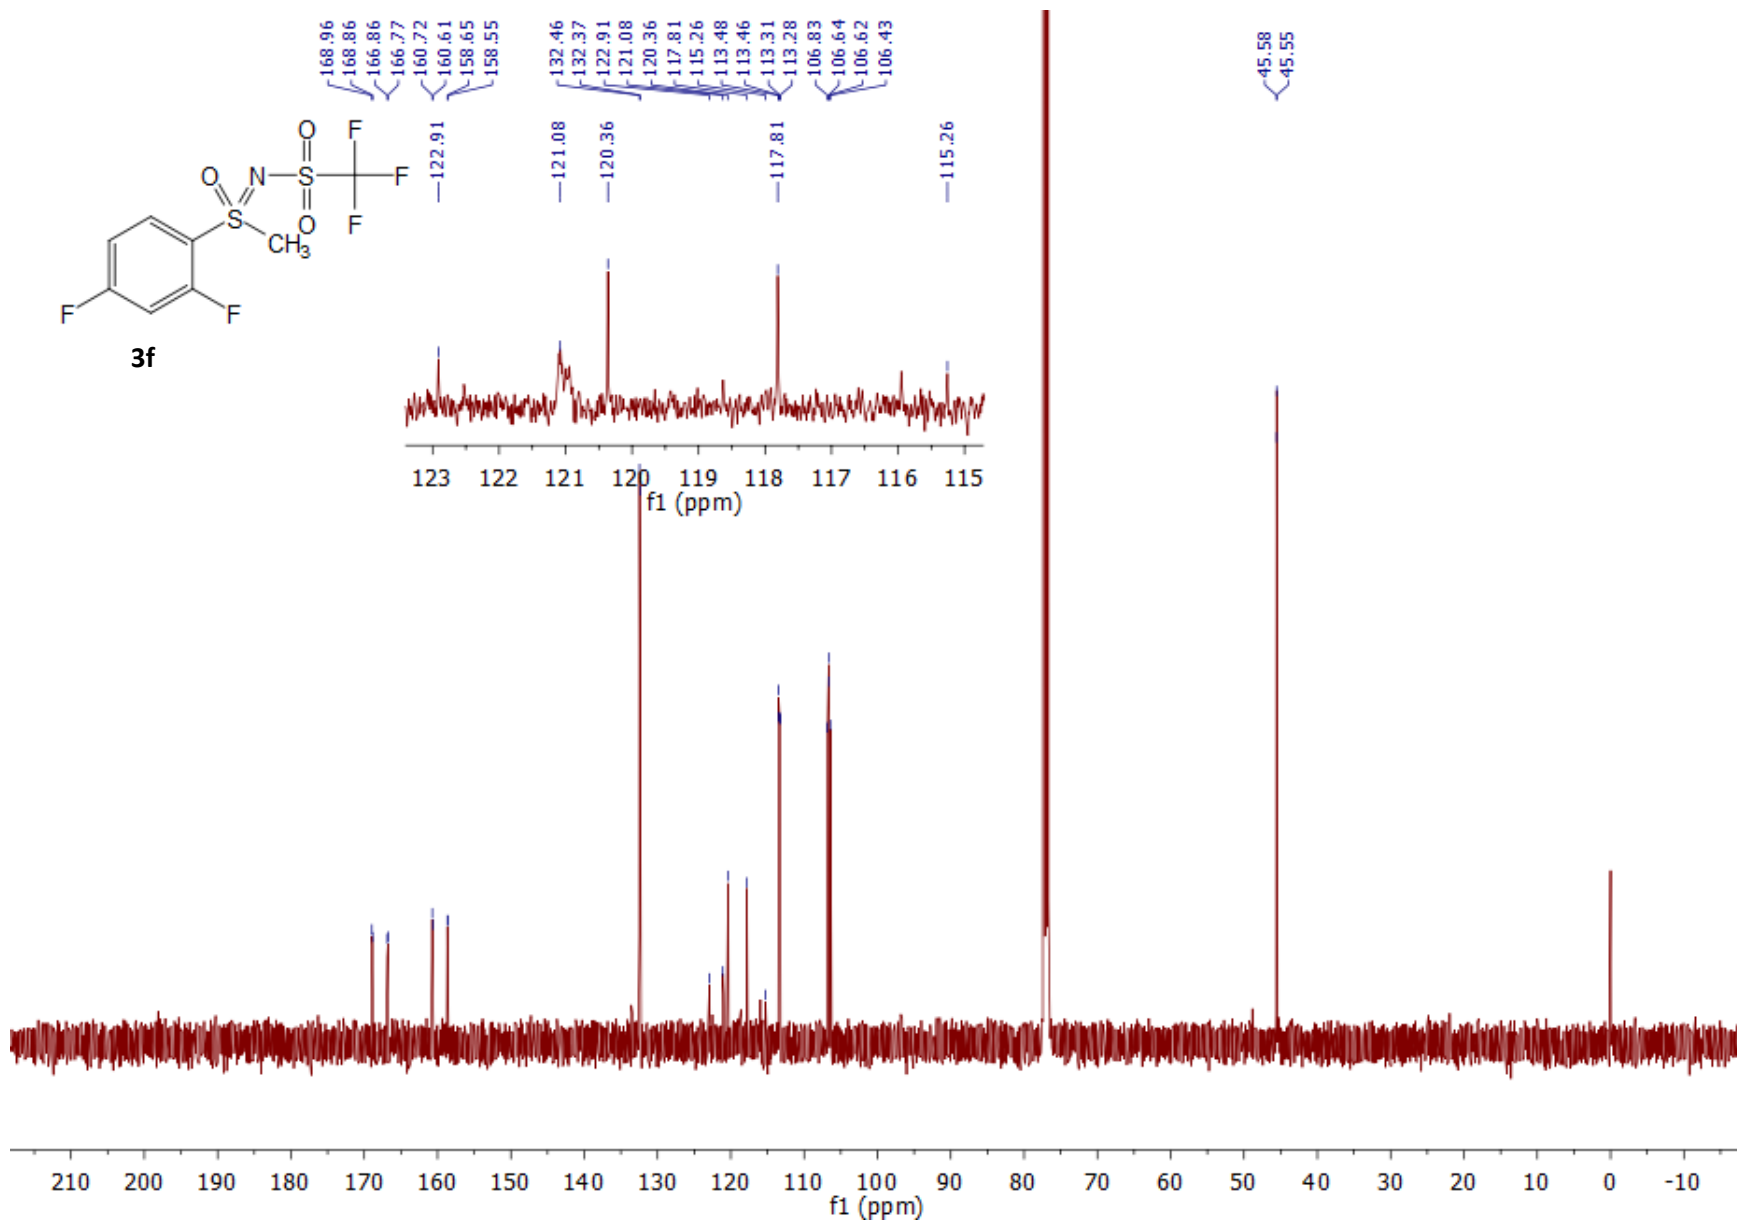

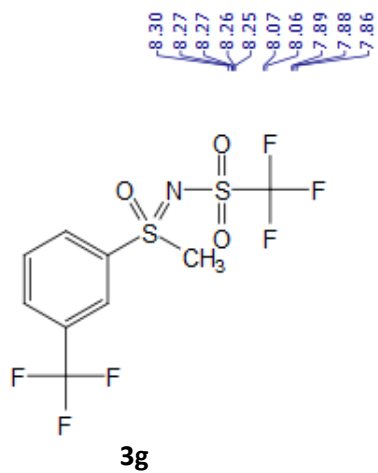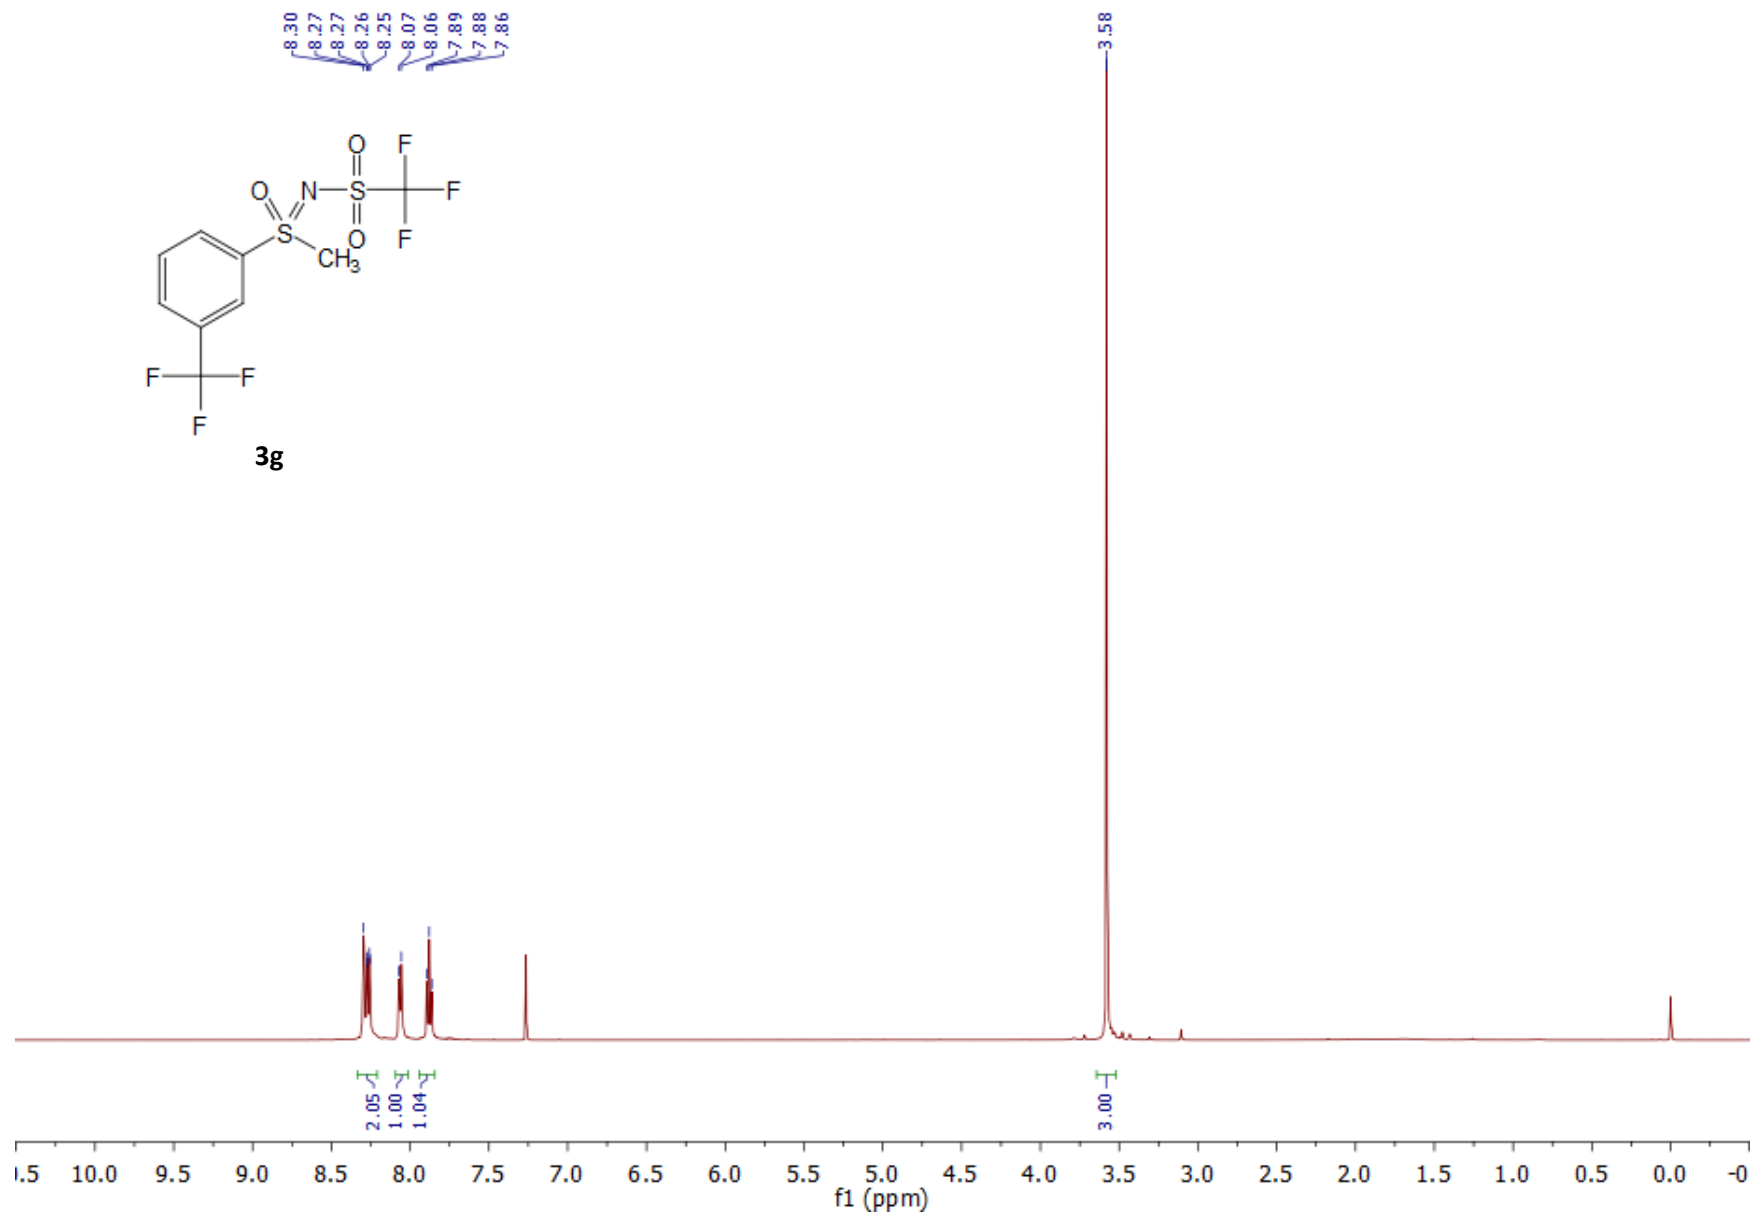



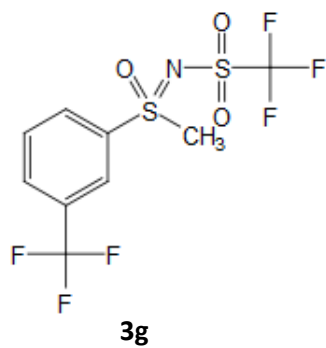

-63.40  
-63.41  
-63.42  
-63.44  
-79.10  
-79.11  
-79.12  
-79.13  
-79.14  
-79.16  
-79.18  
-79.19  
-79.20

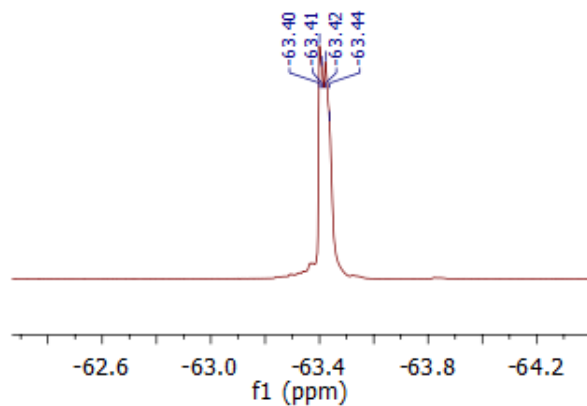

-79.10  
-79.11  
-79.12  
-79.13  
-79.14  
-79.16  
-79.18  
-79.19  
-79.20

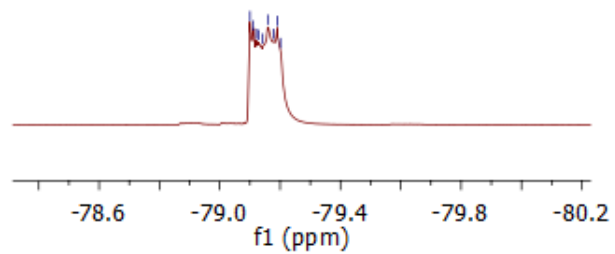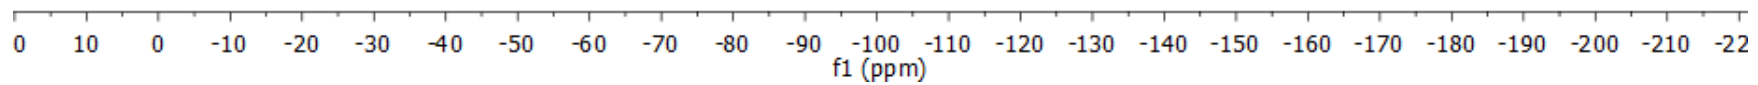

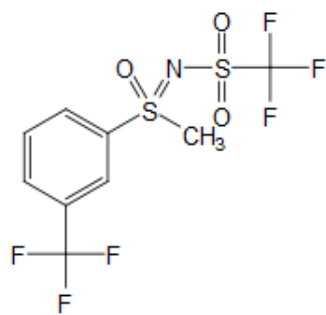

3g

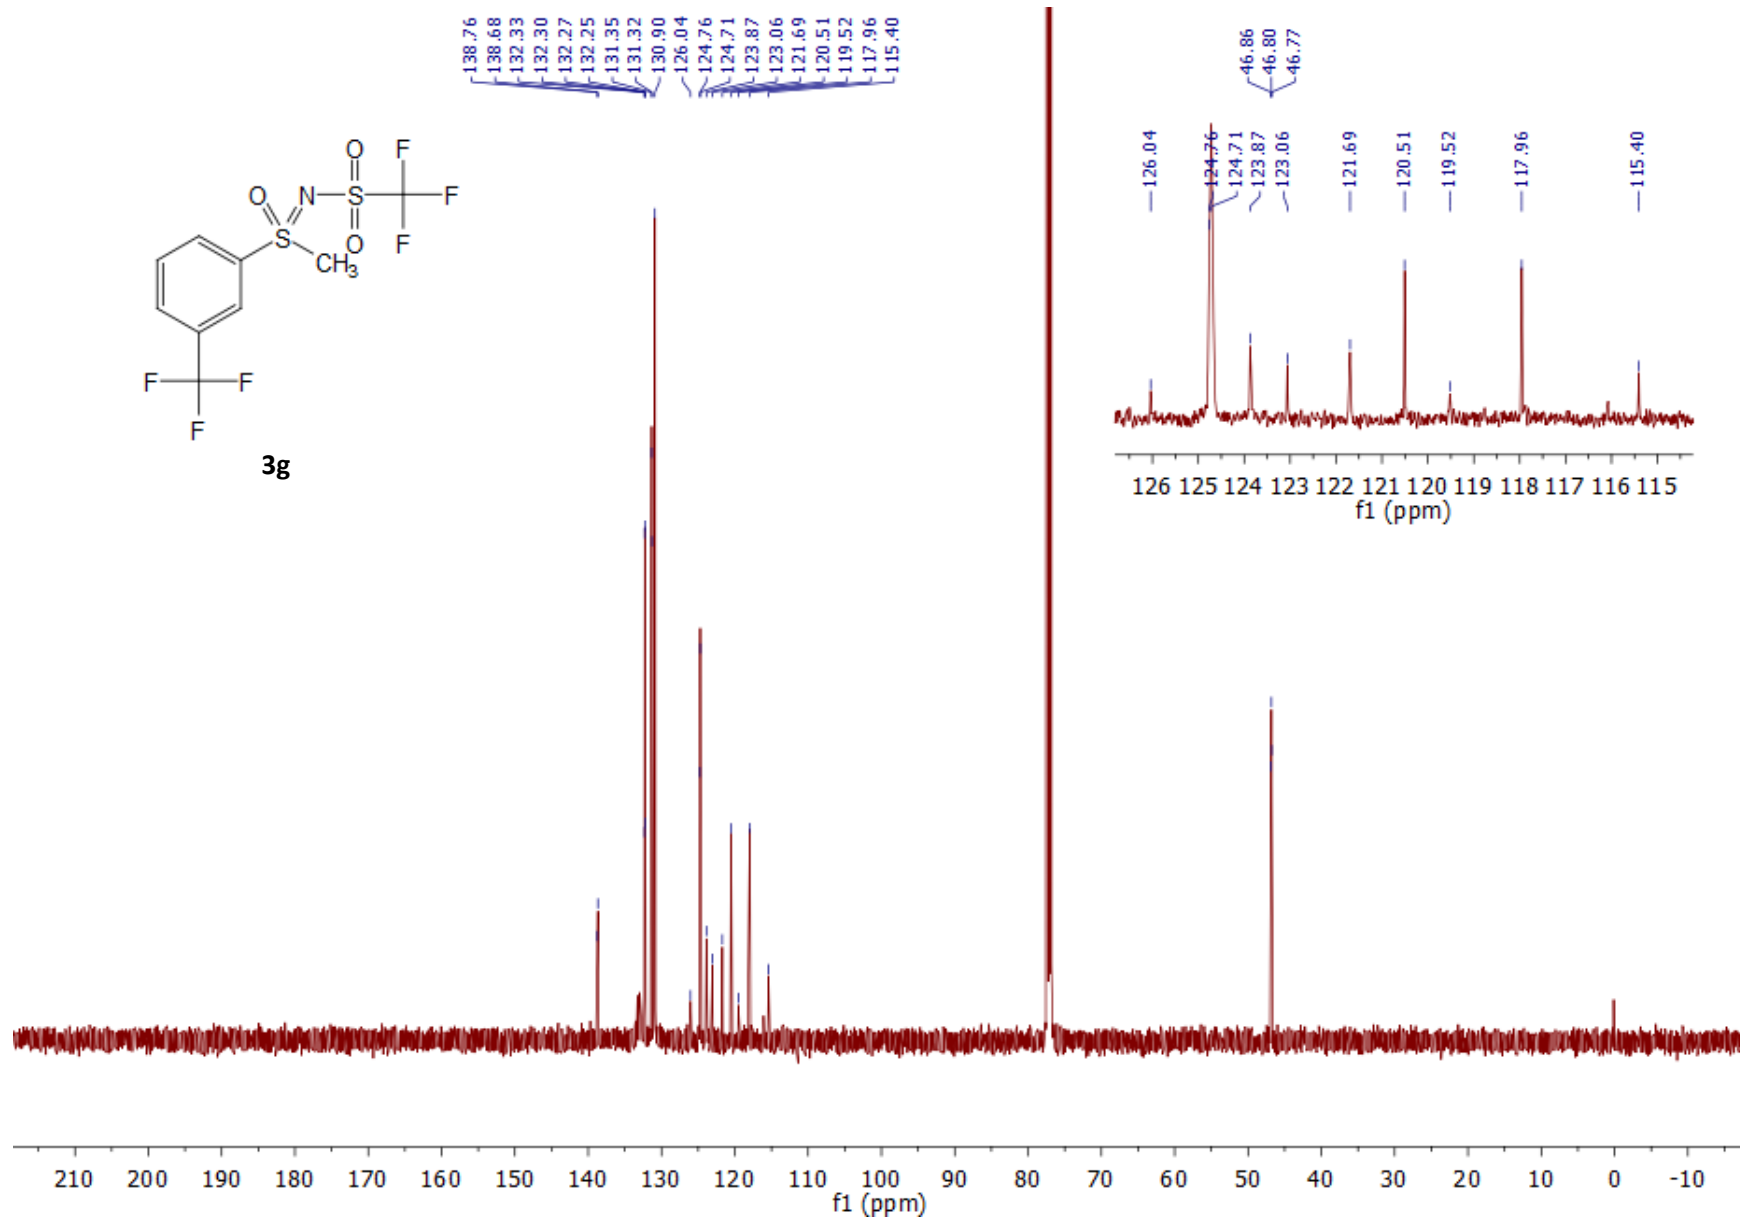

8.81  
8.81  
8.80  
8.80  
8.80  
8.79  
8.79  
8.26  
8.25  
8.25  
8.24  
8.24  
8.24  
8.11  
8.10  
8.09  
8.09  
8.07  
8.07  
7.71  
7.71  
7.70  
7.70  
7.70  
7.69  
7.68

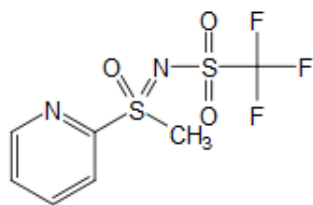

**3h**

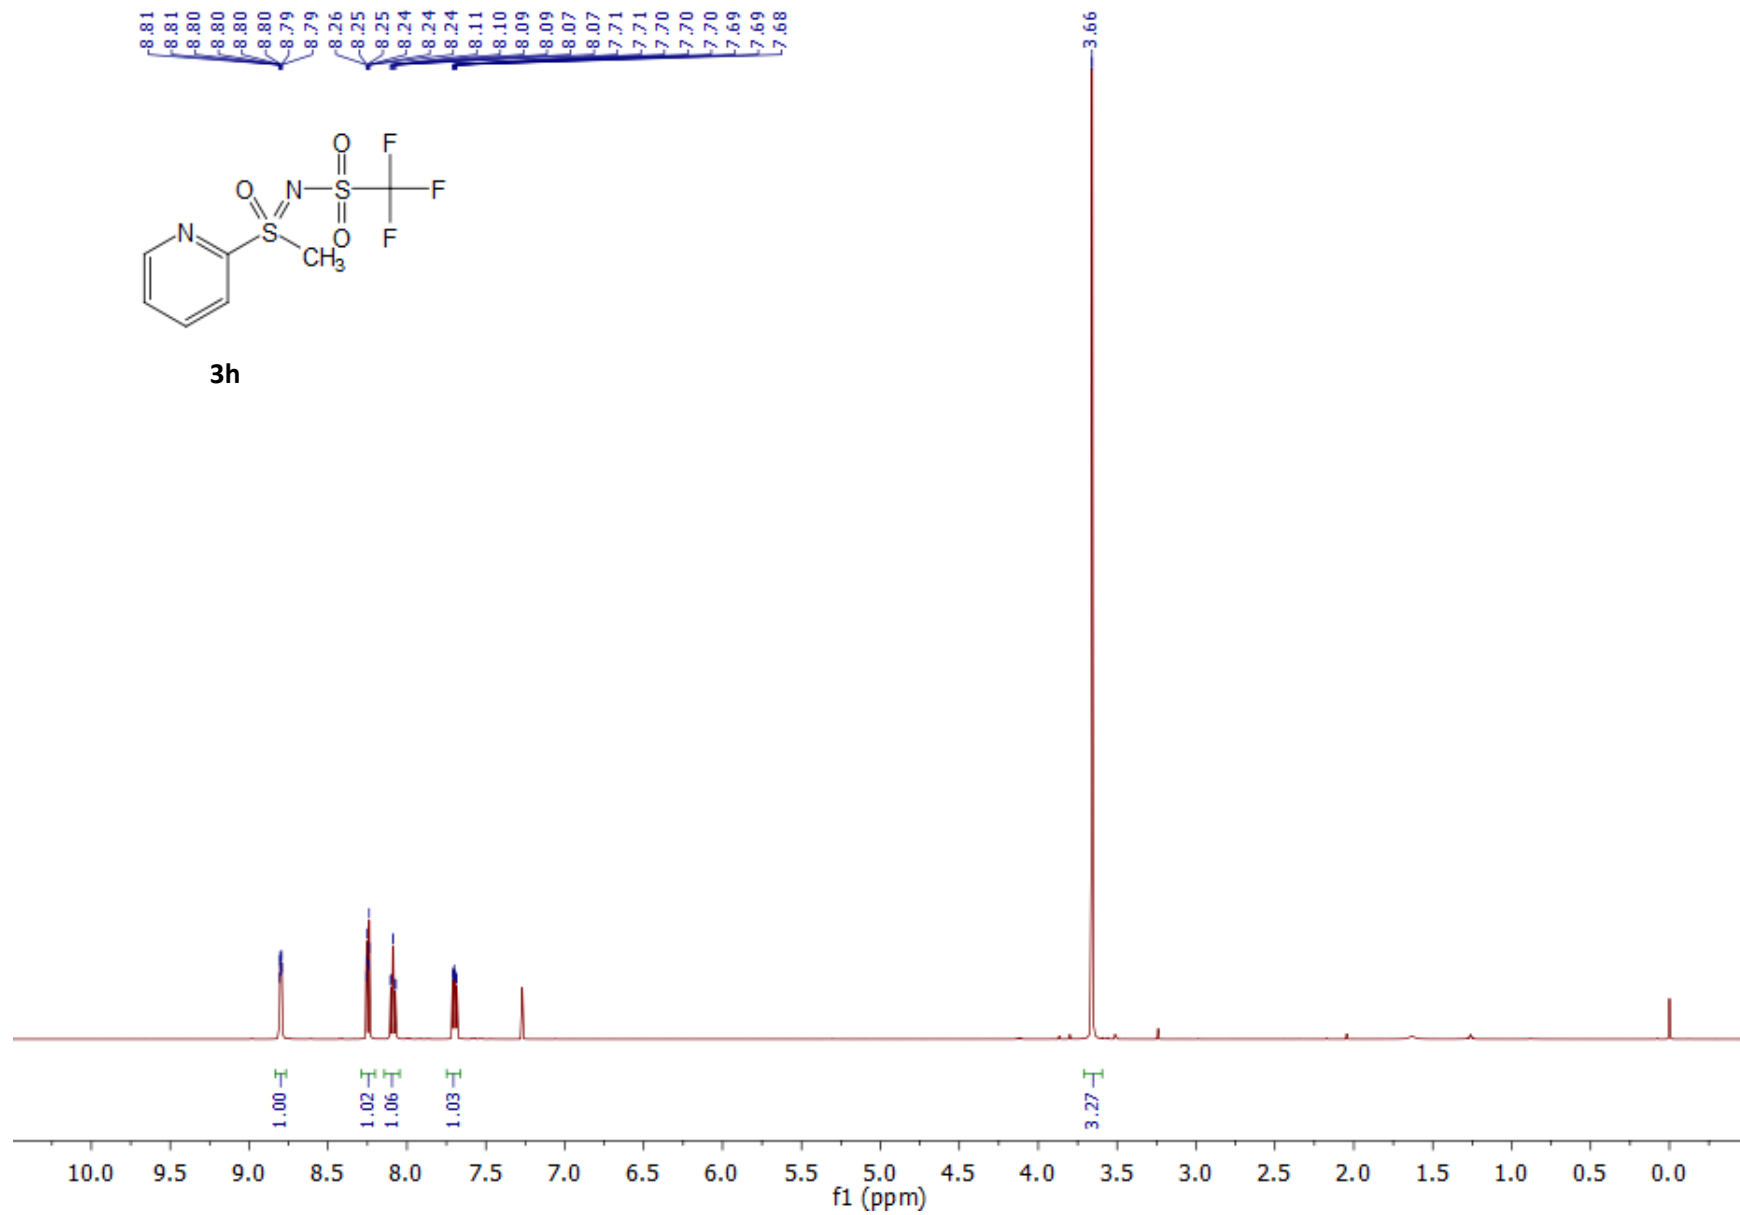



**3h**

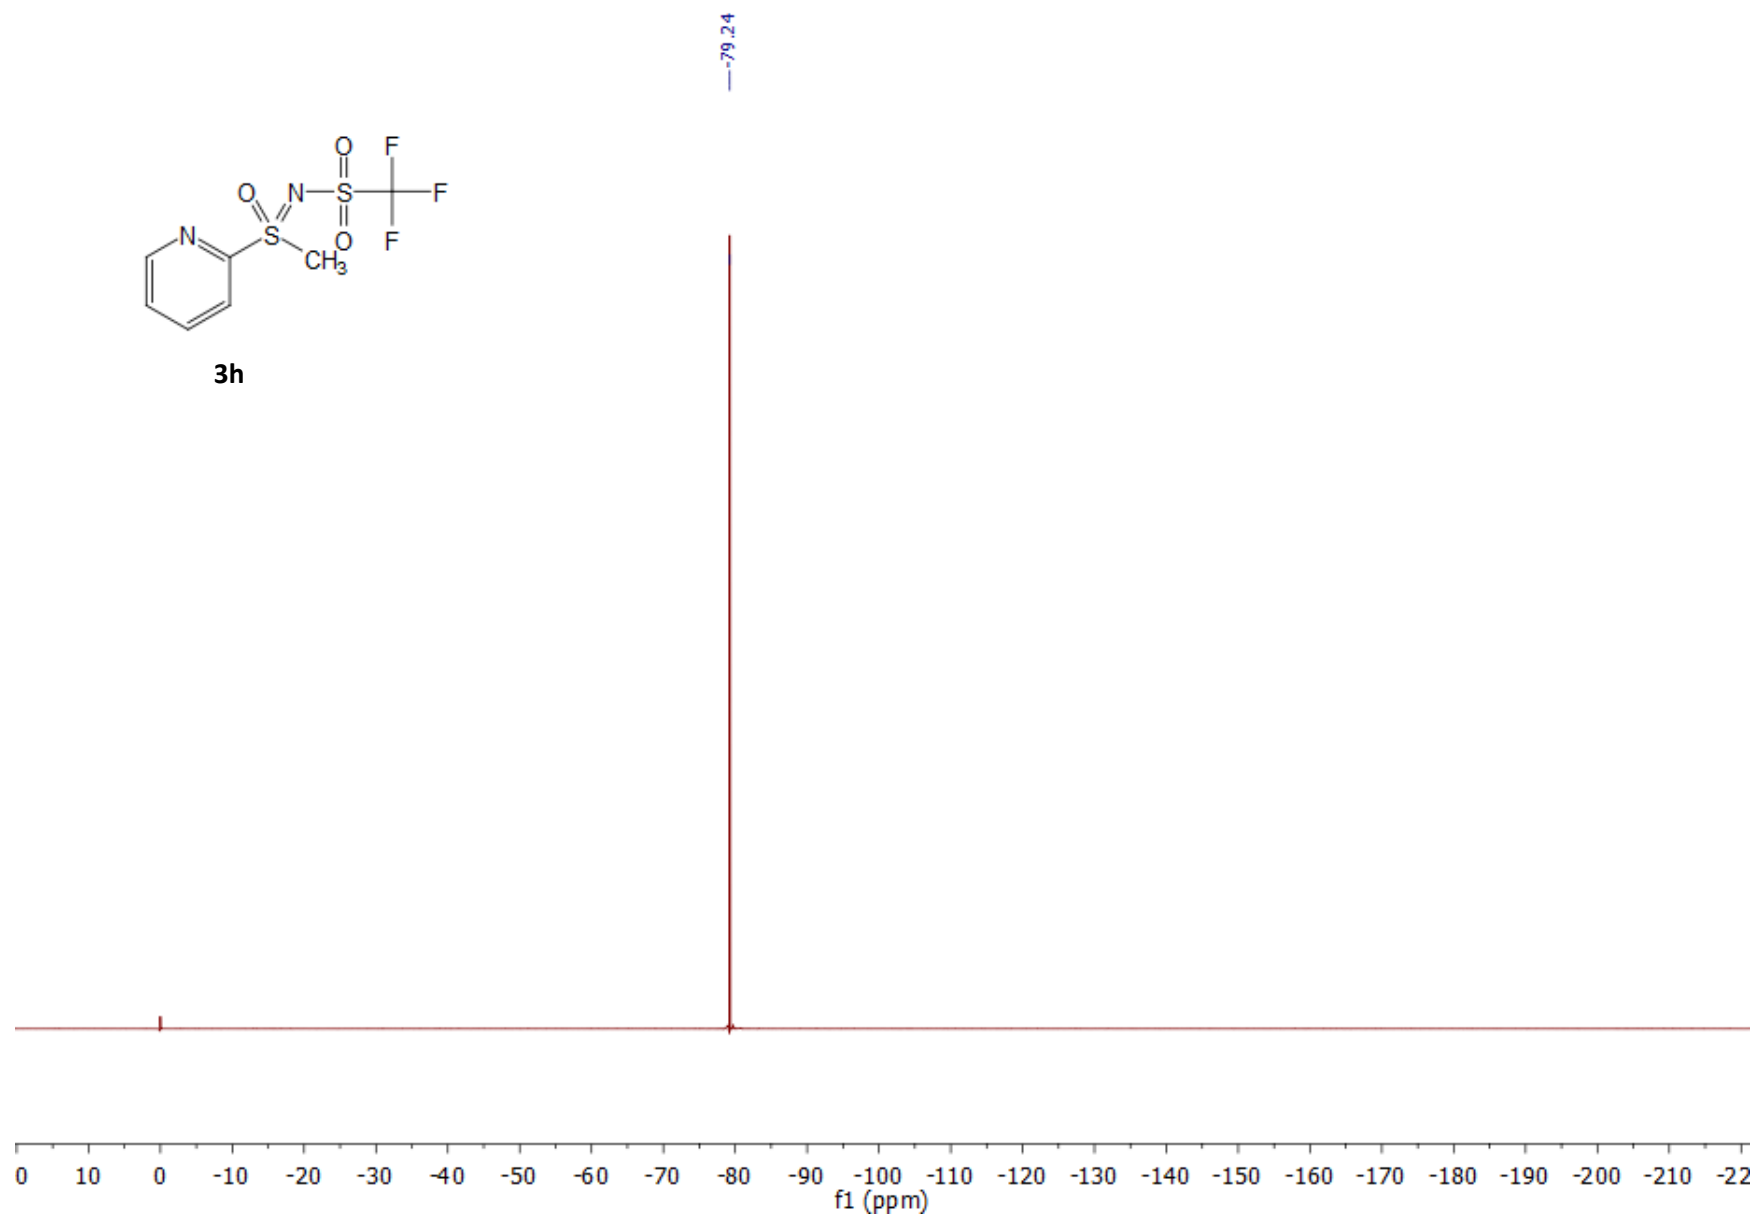

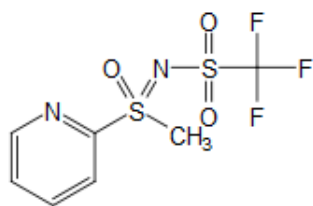

3h

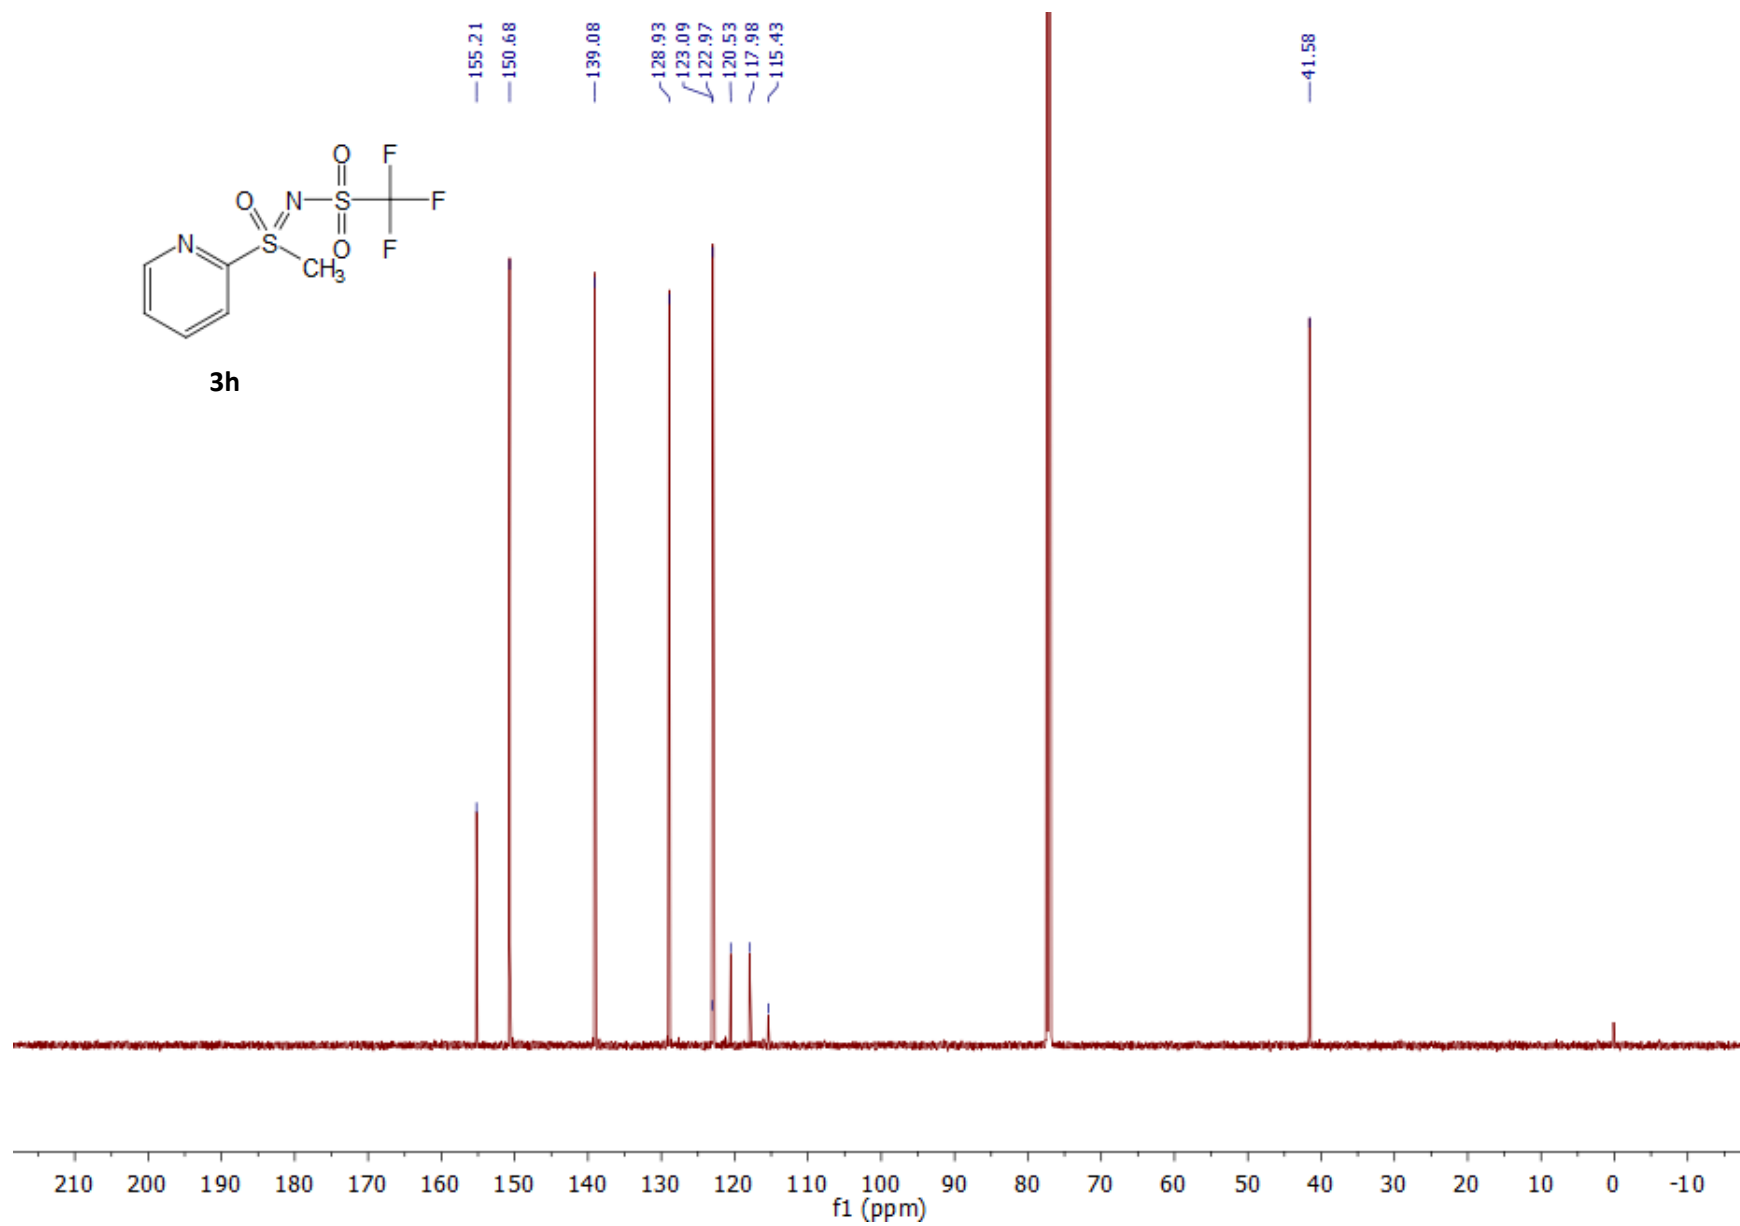

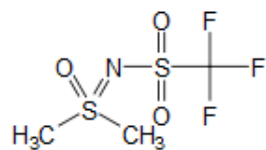

**3i**

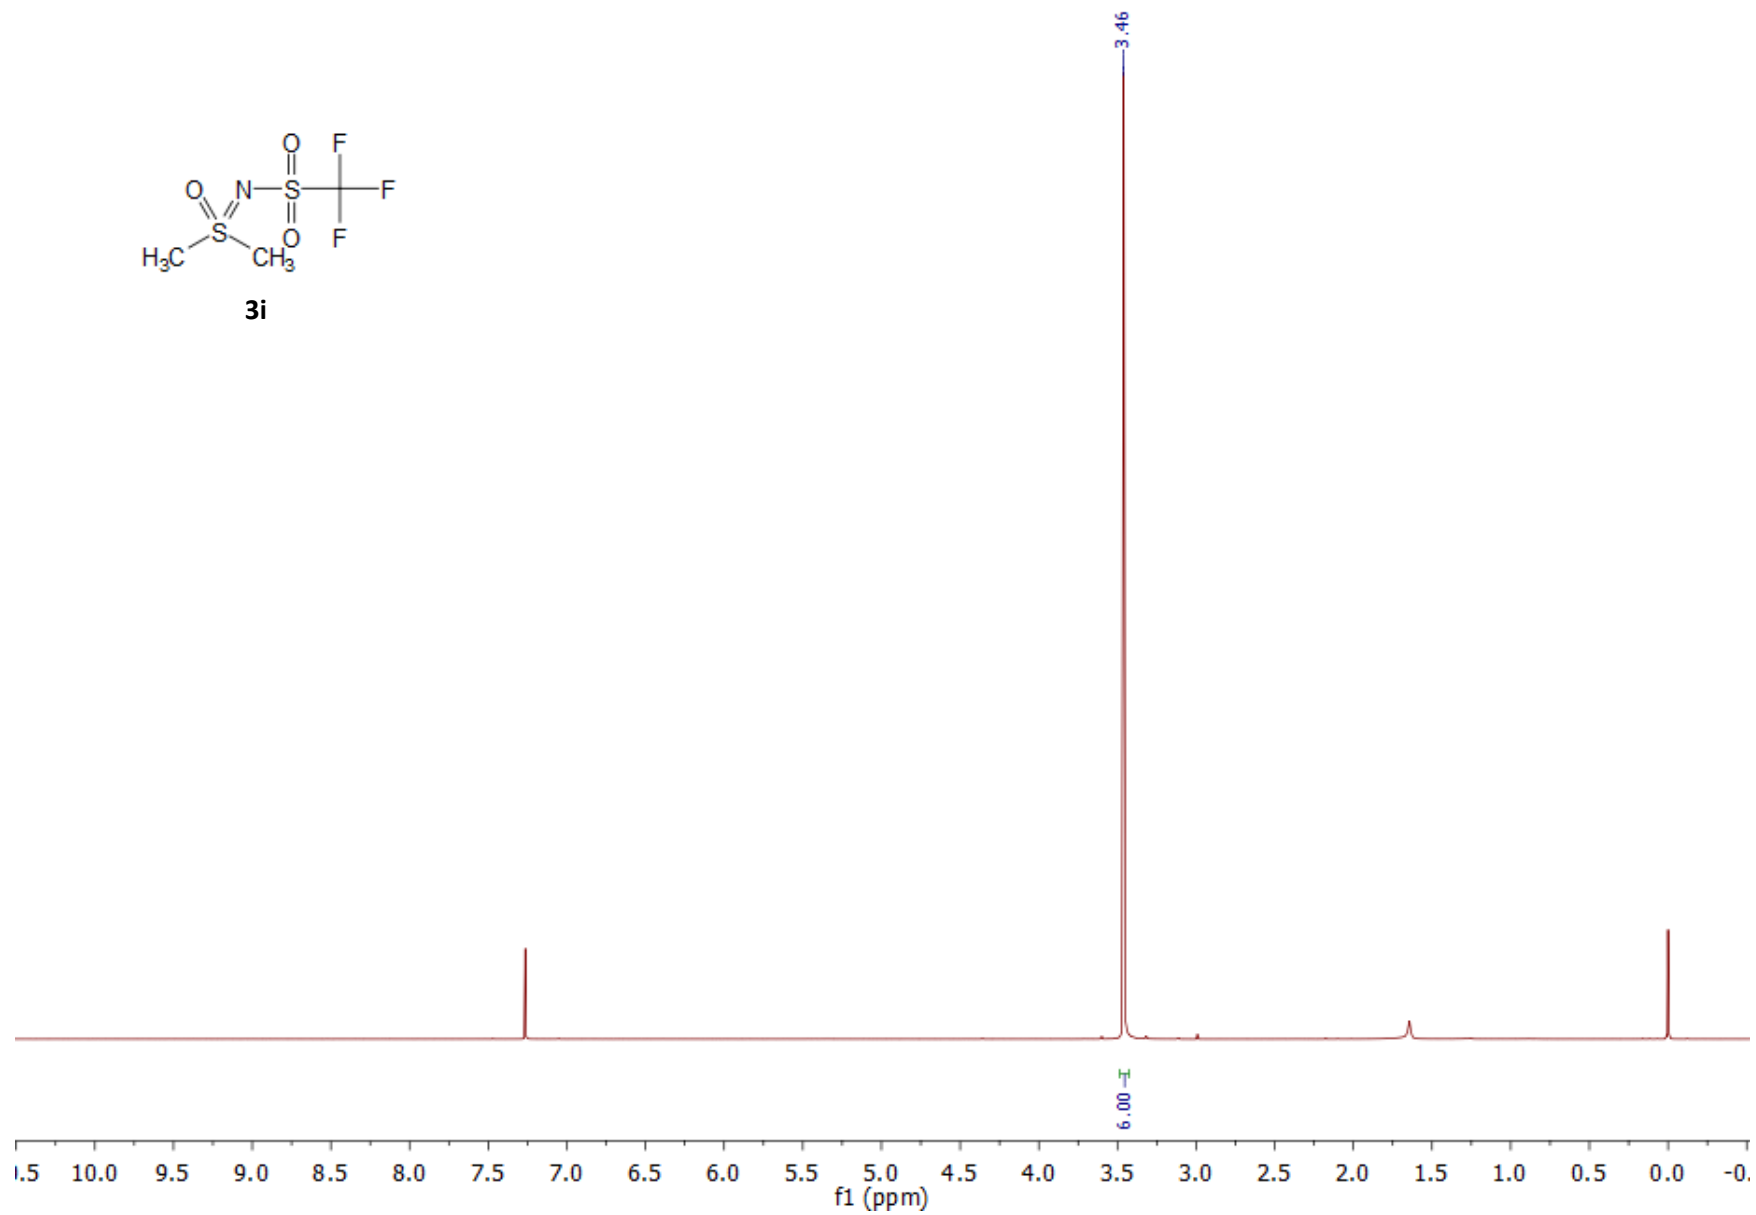

S46

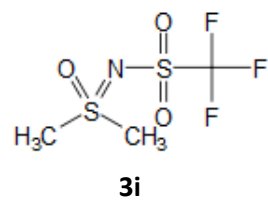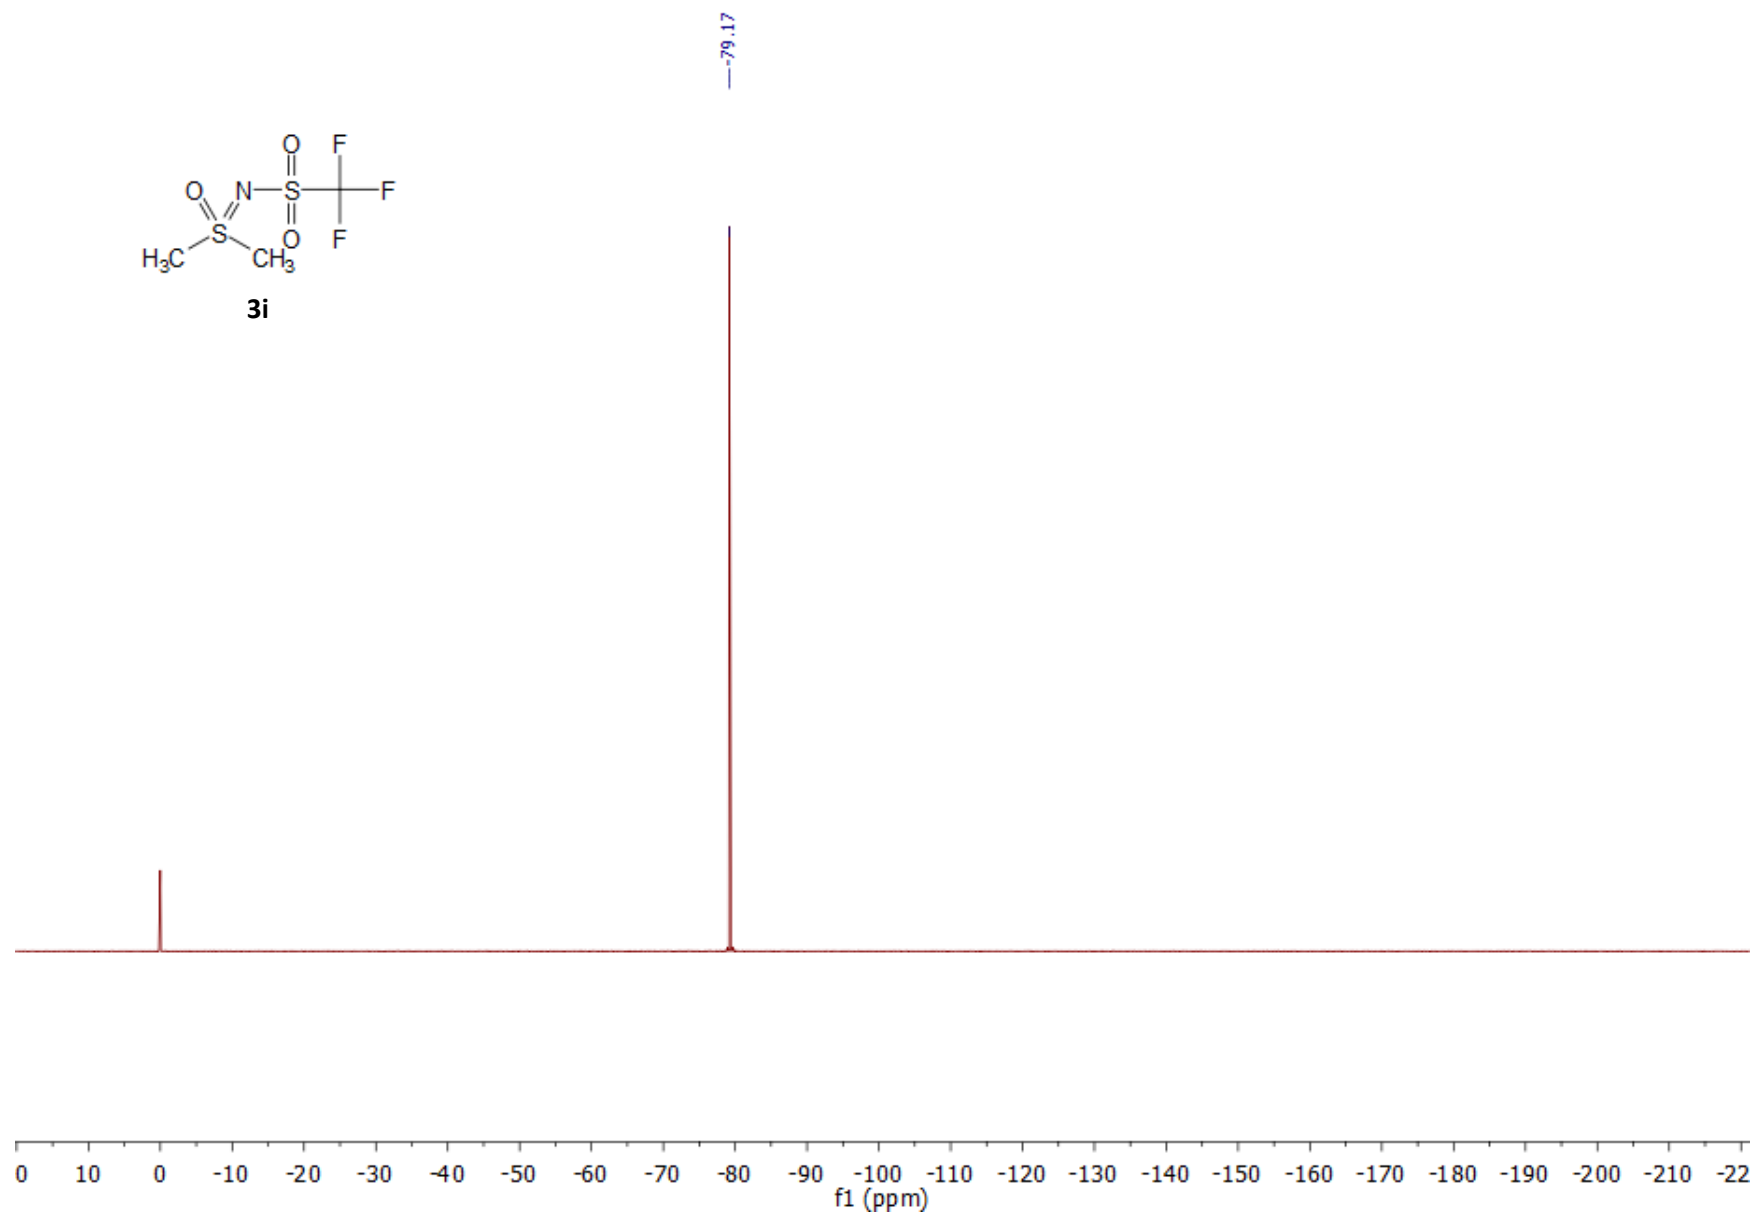



**3i**

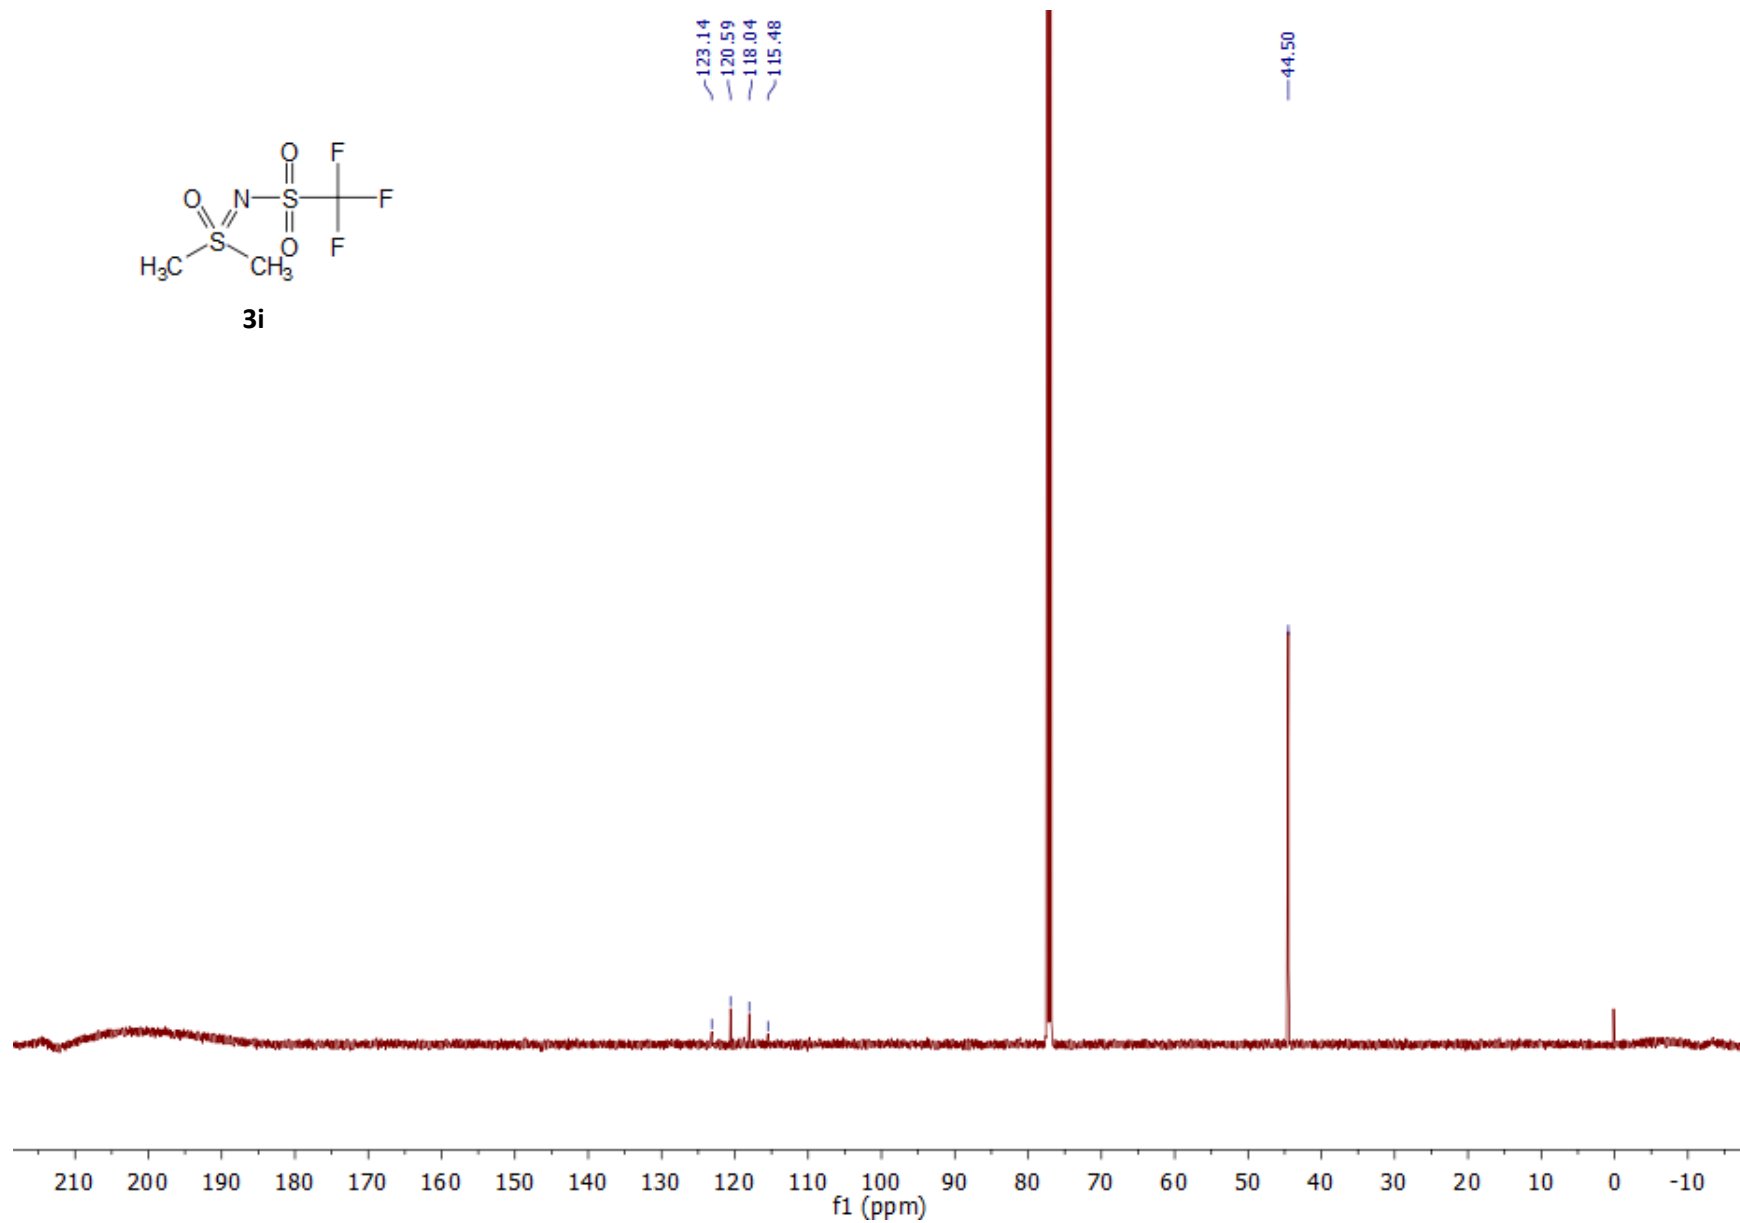



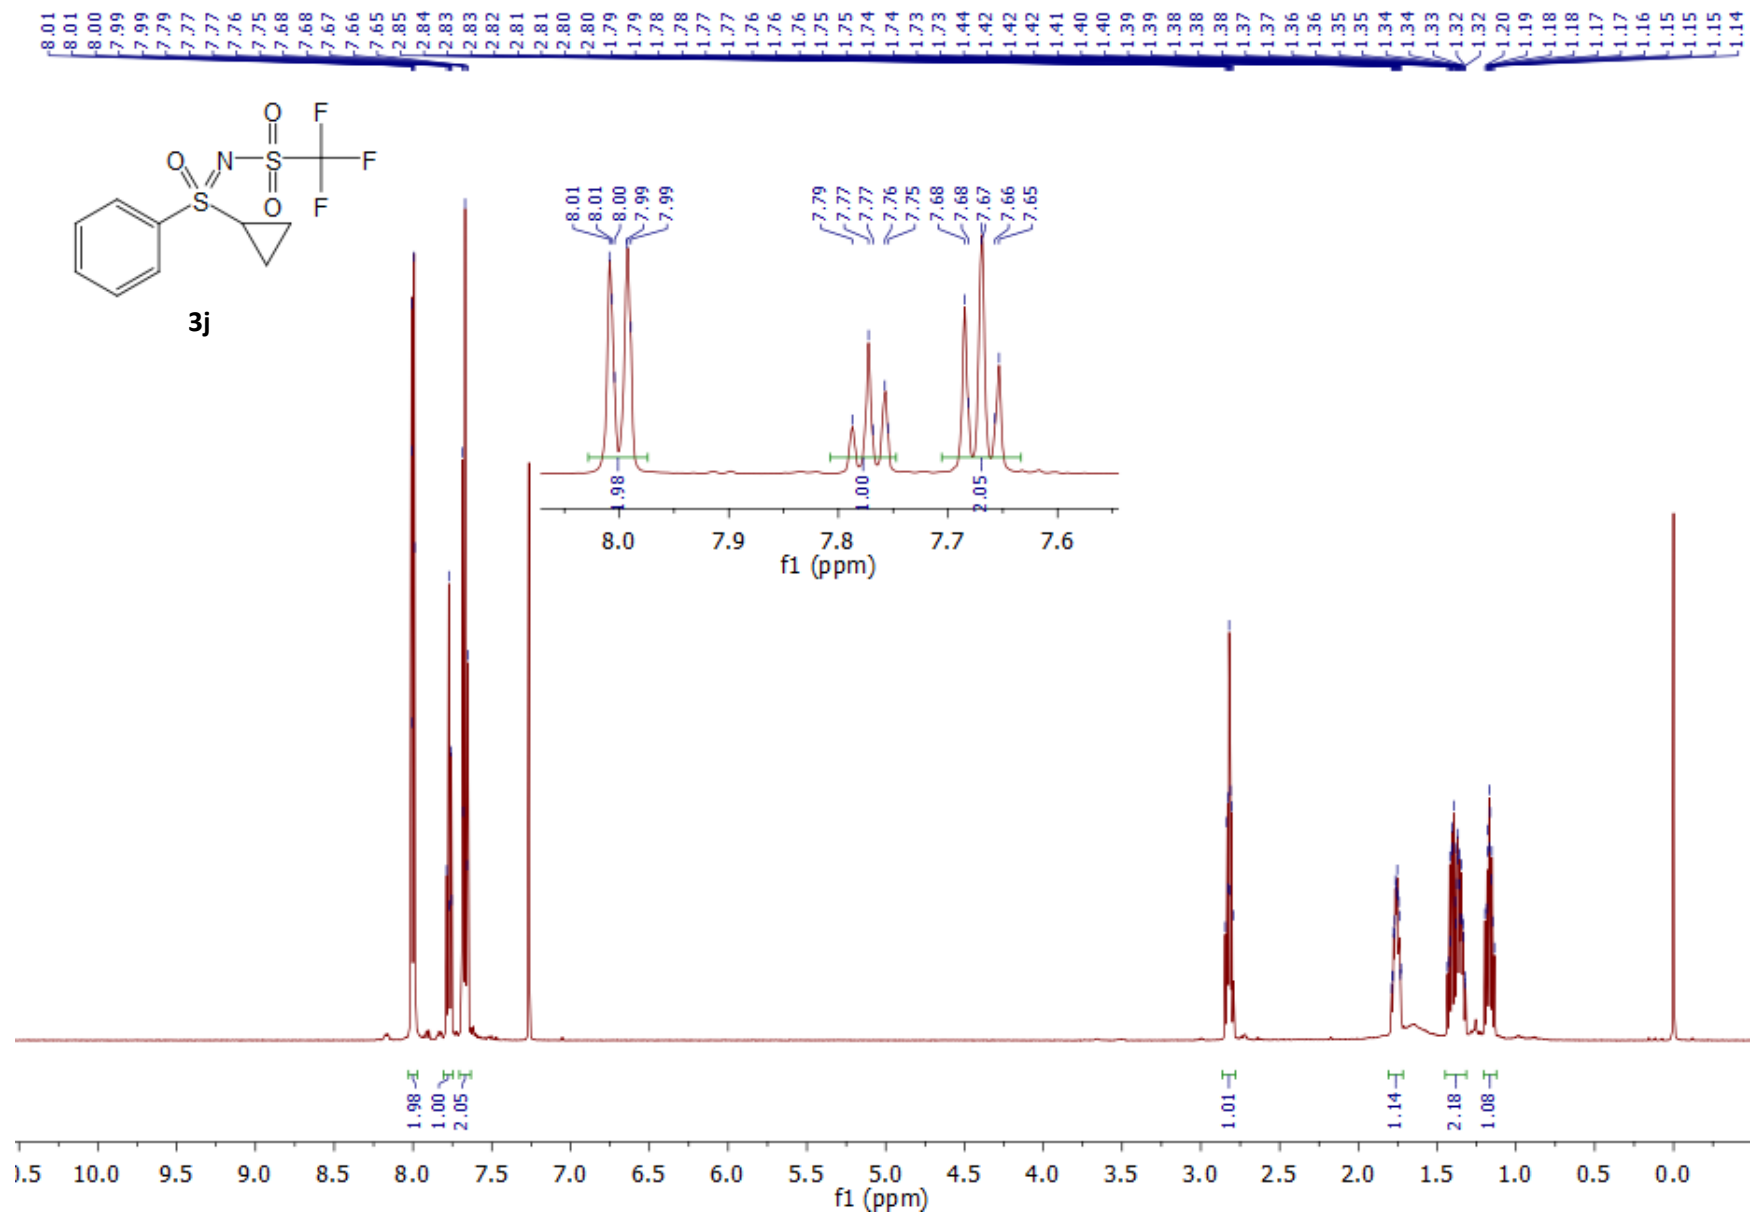

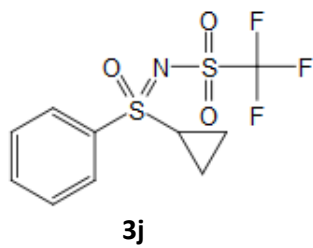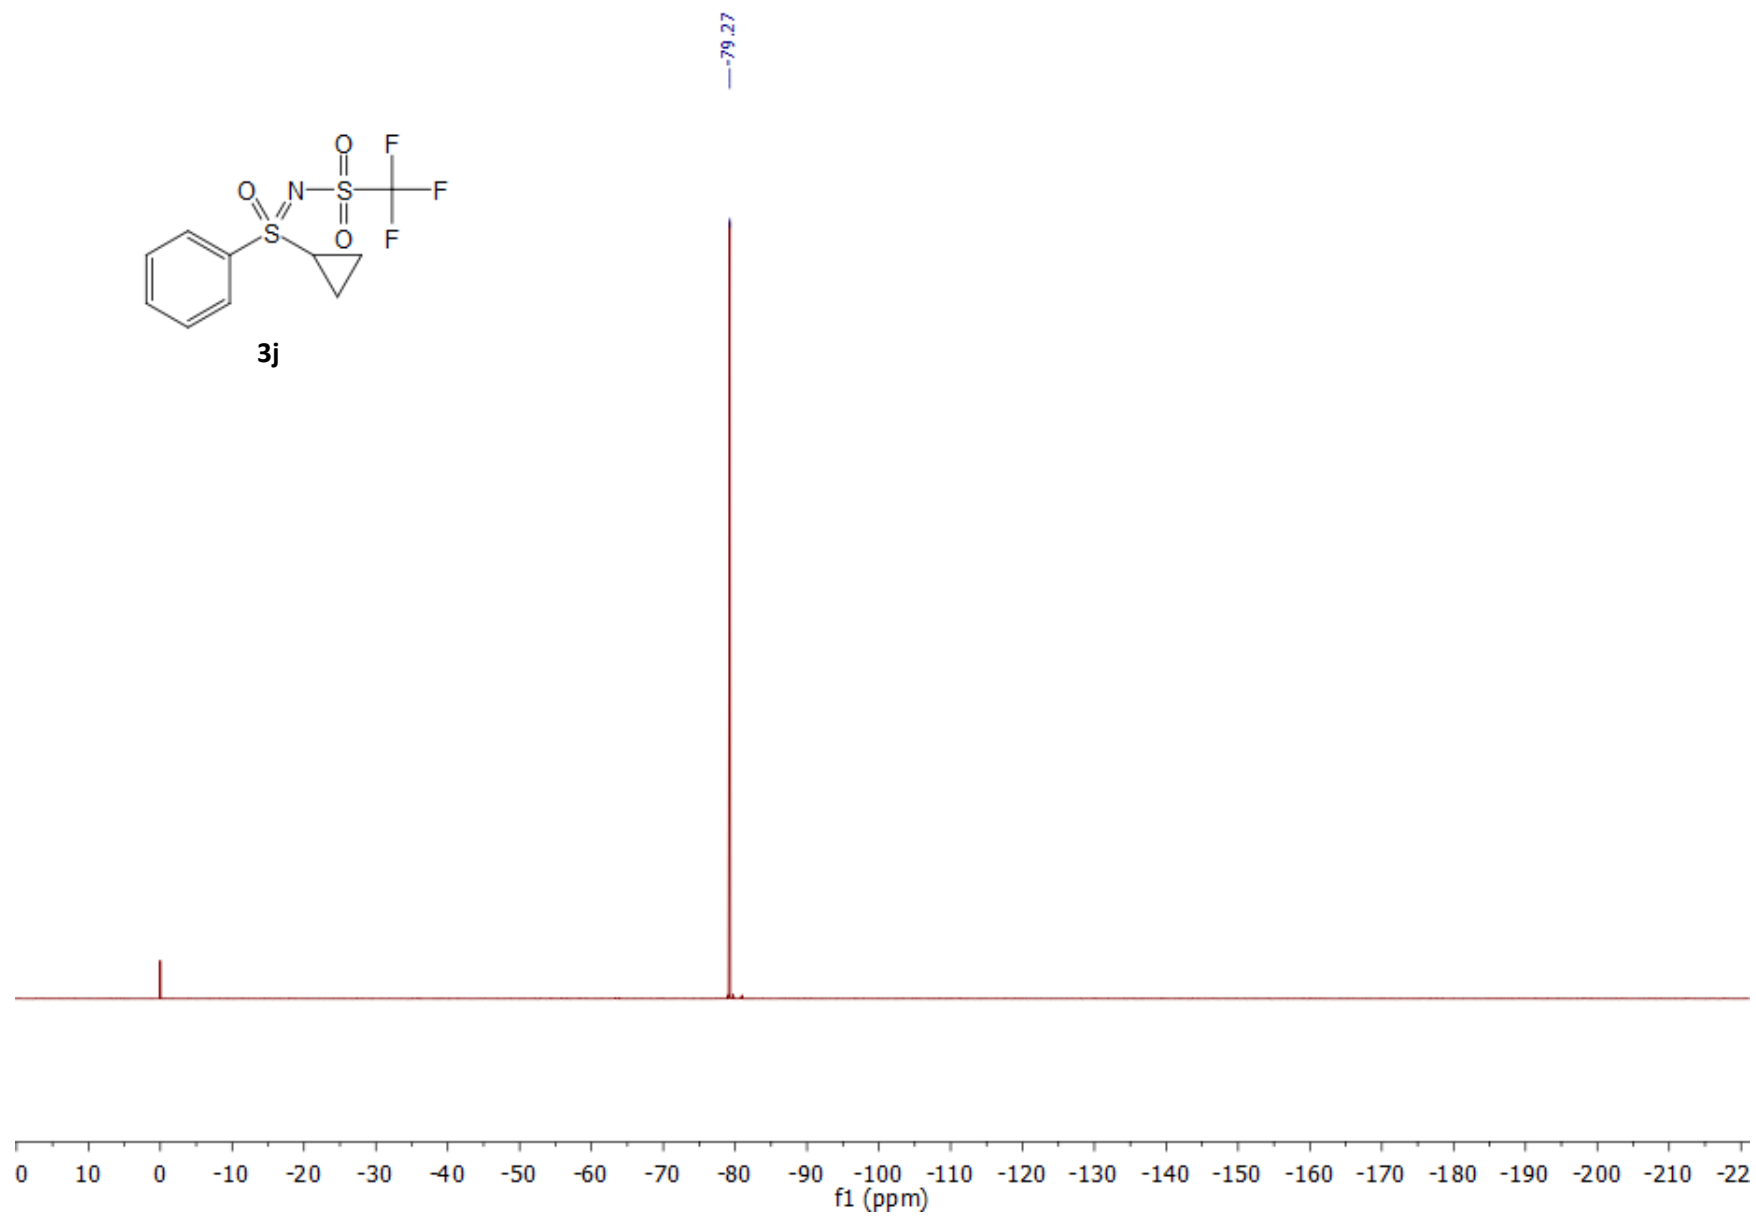

S50

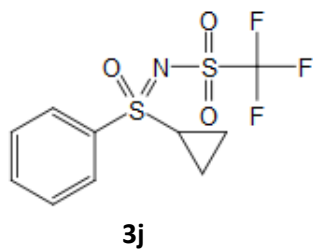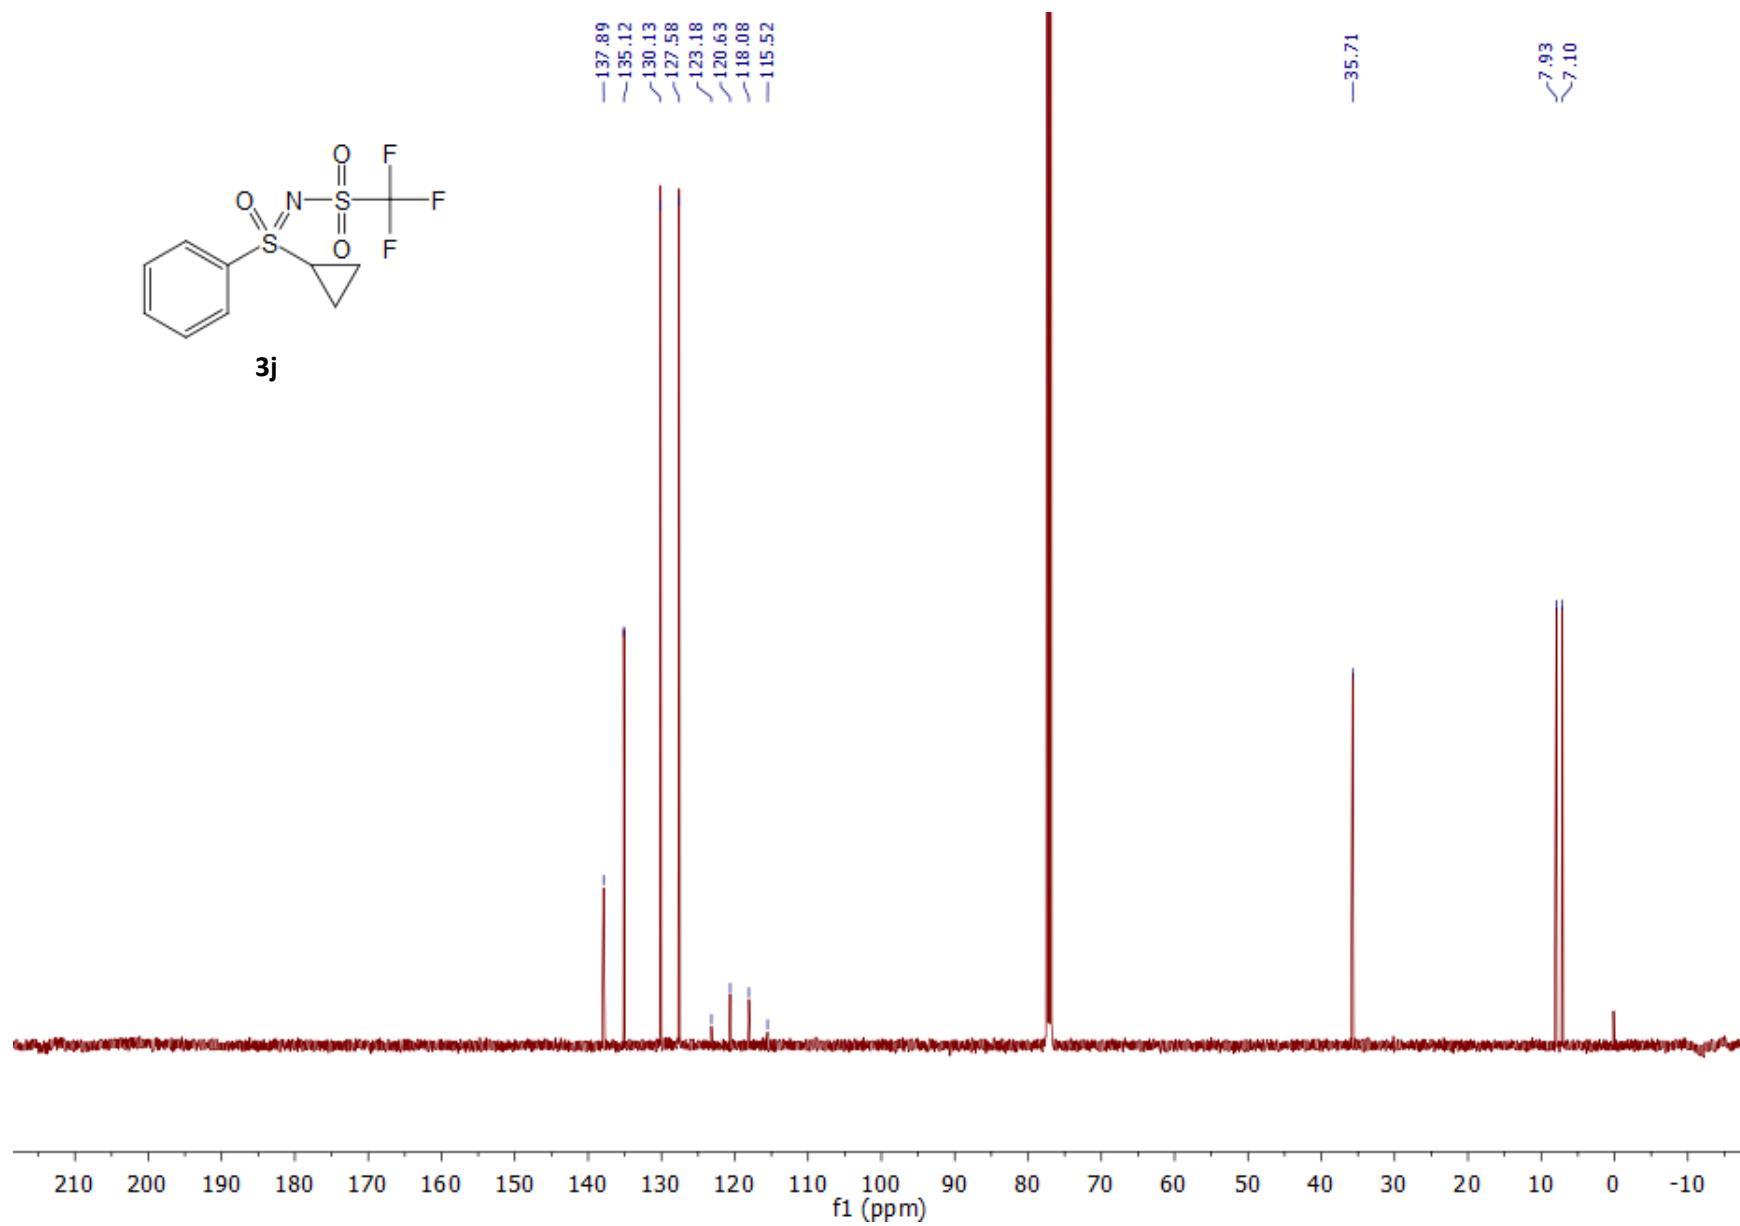

S51

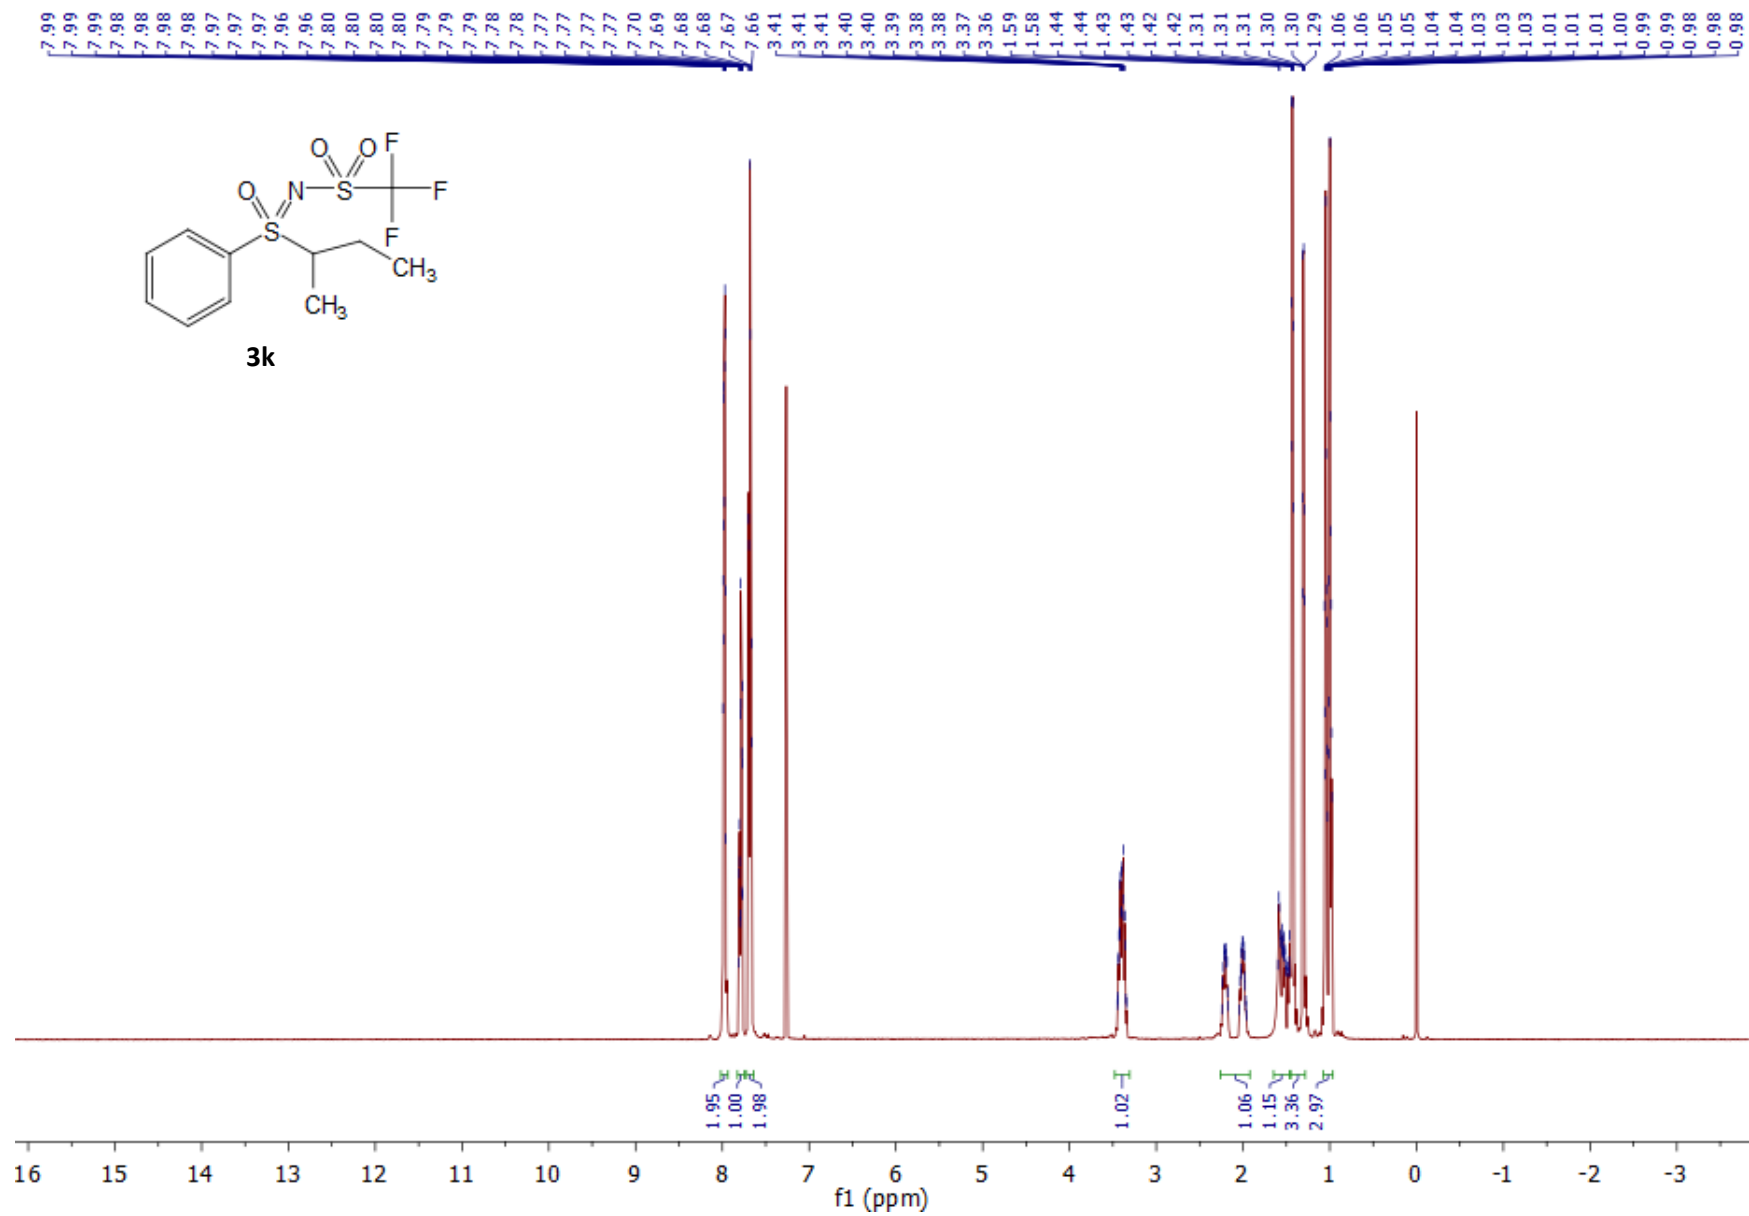

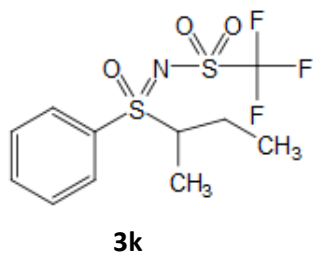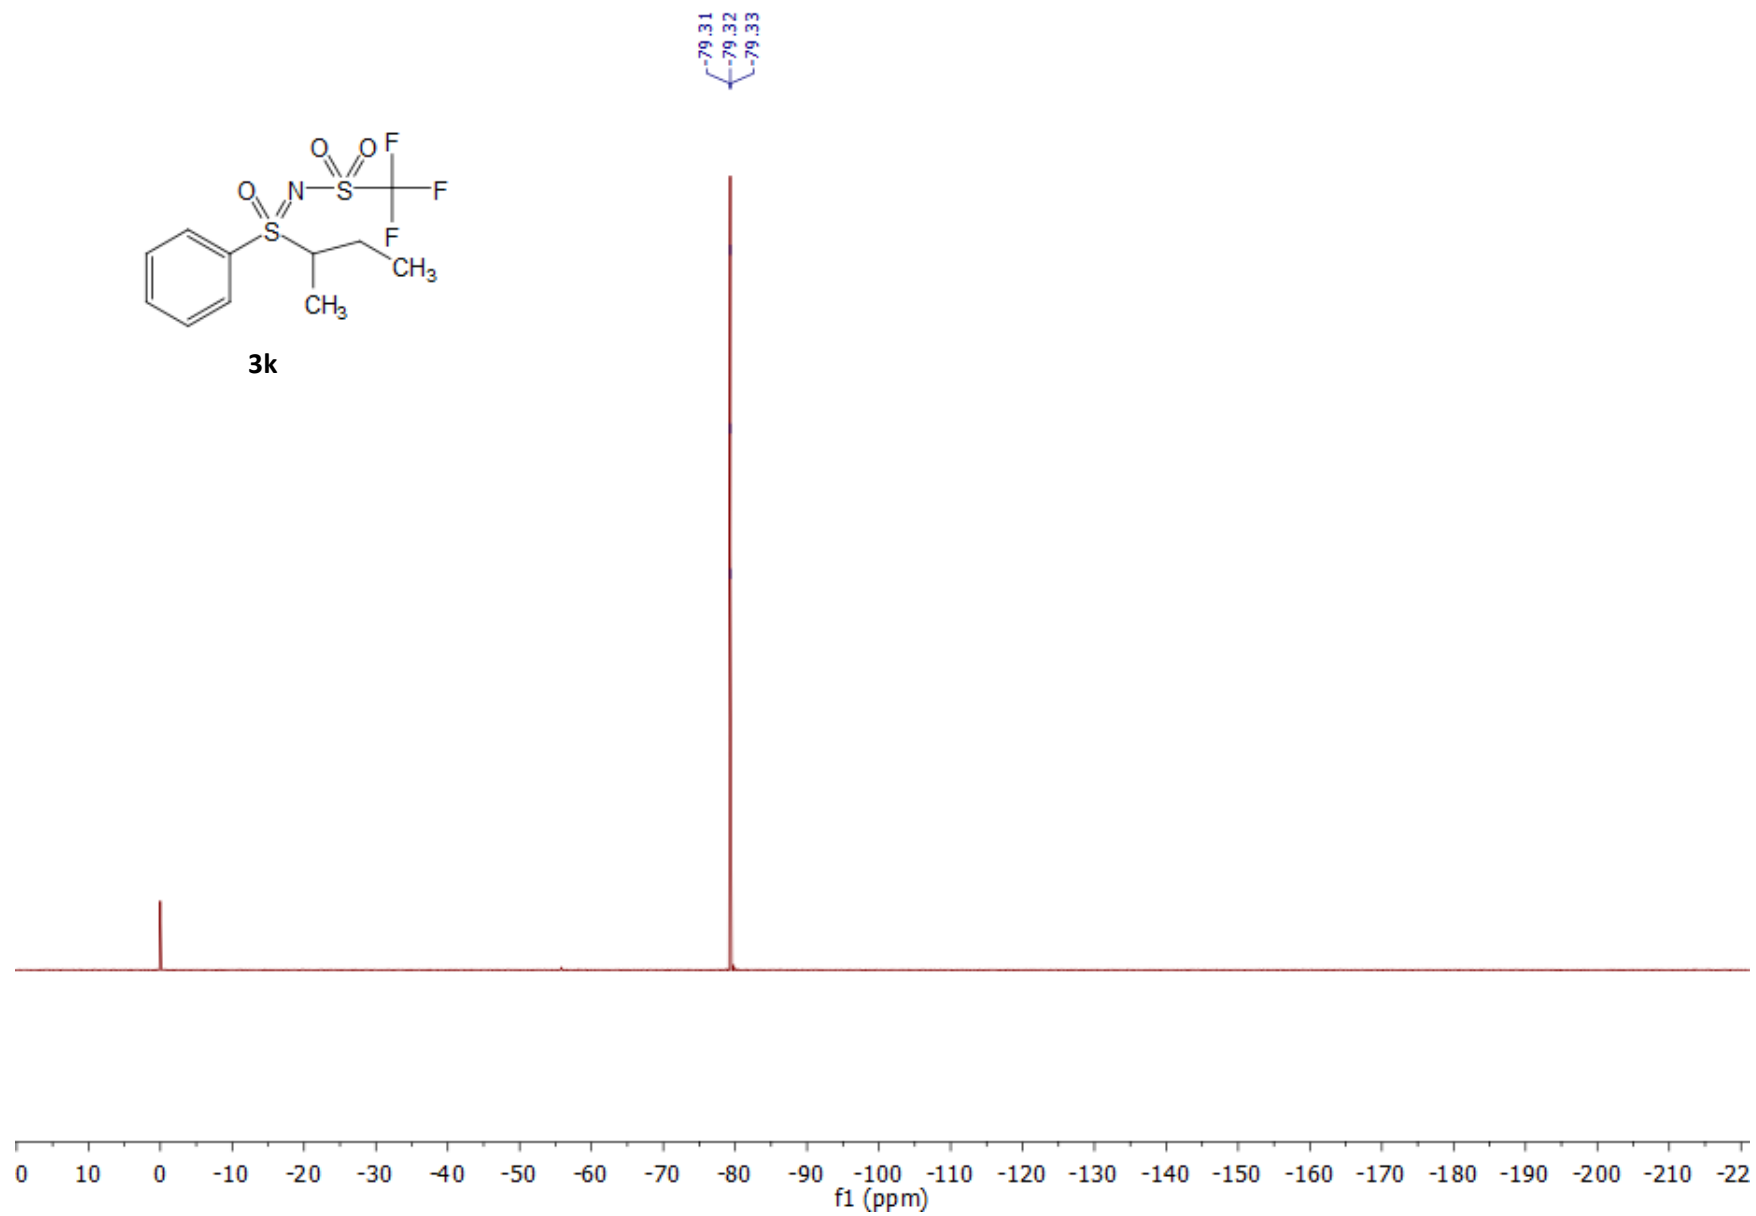

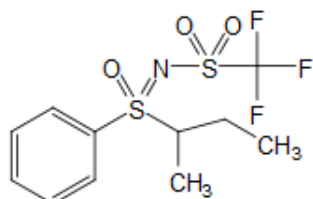

**3k**

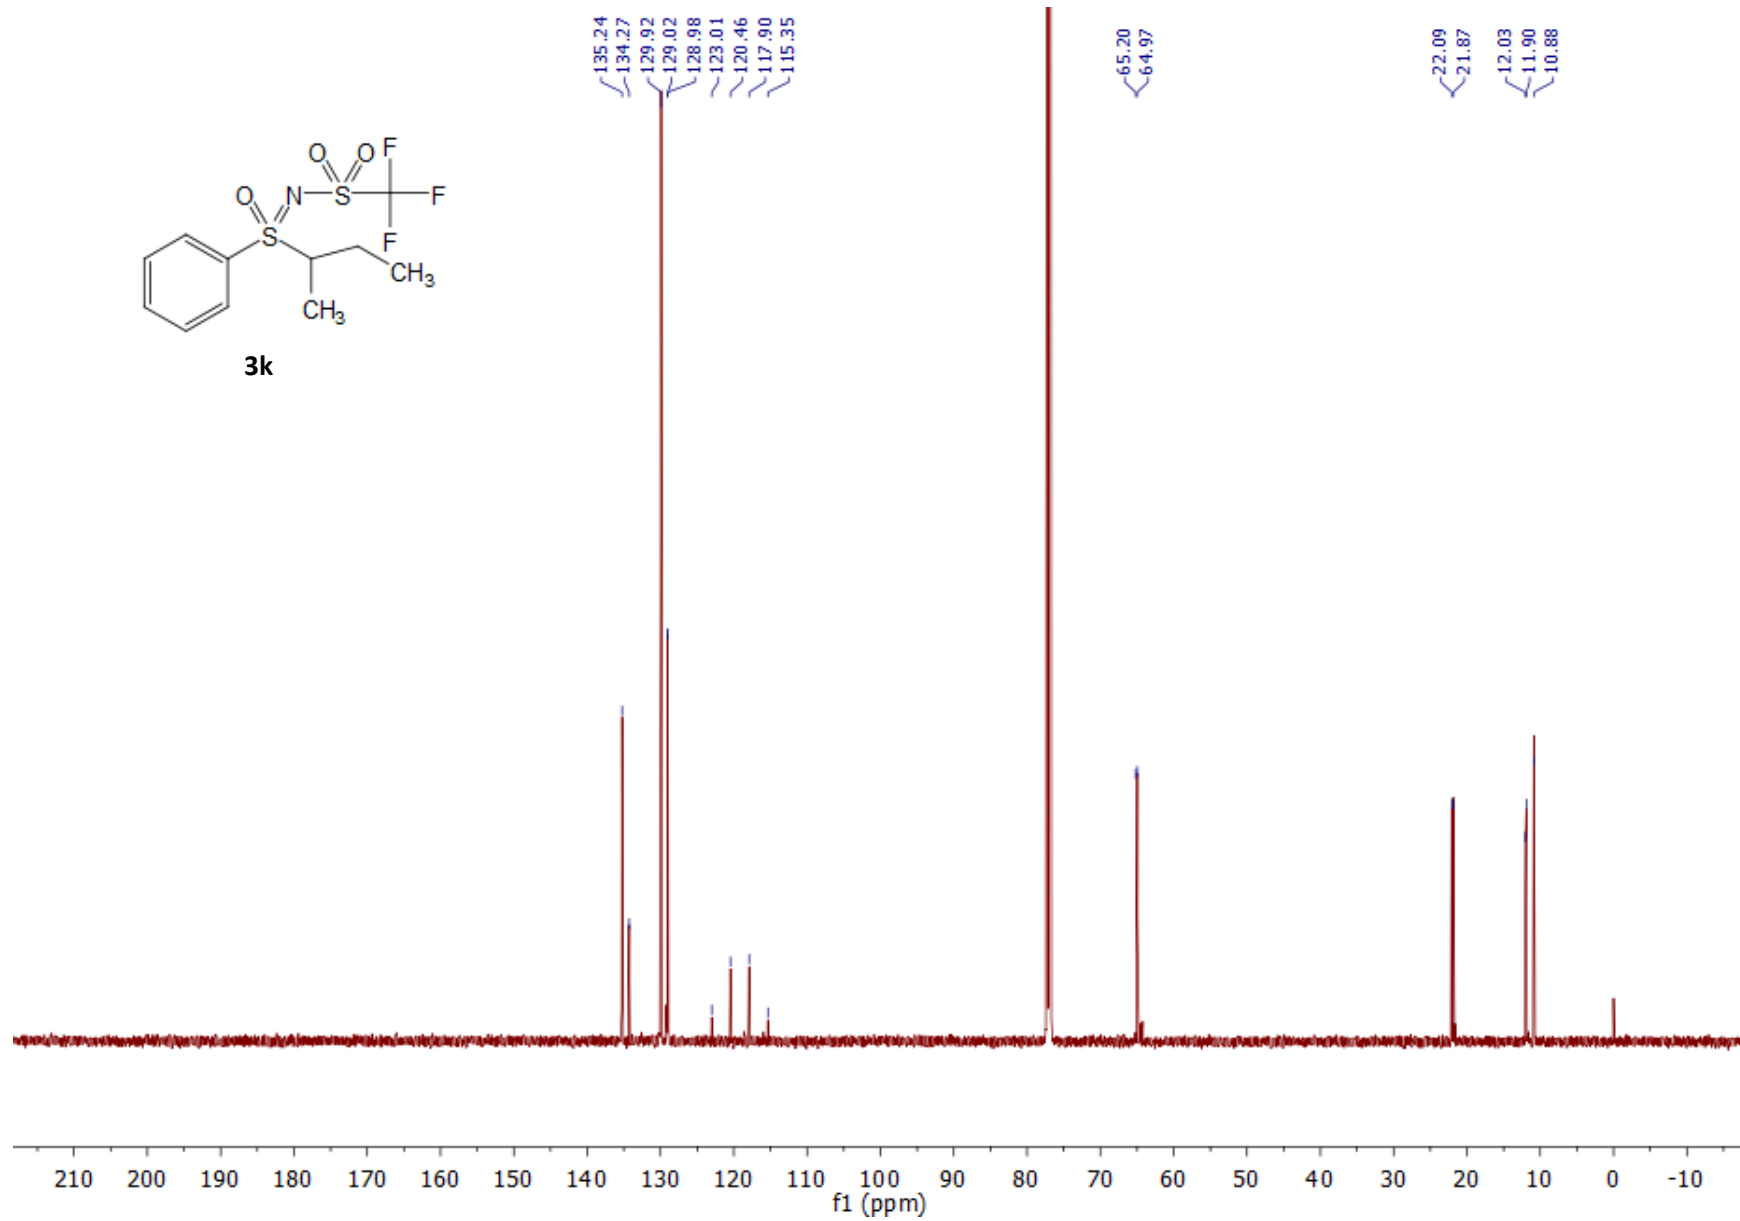

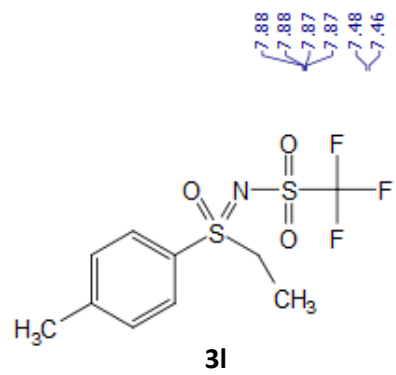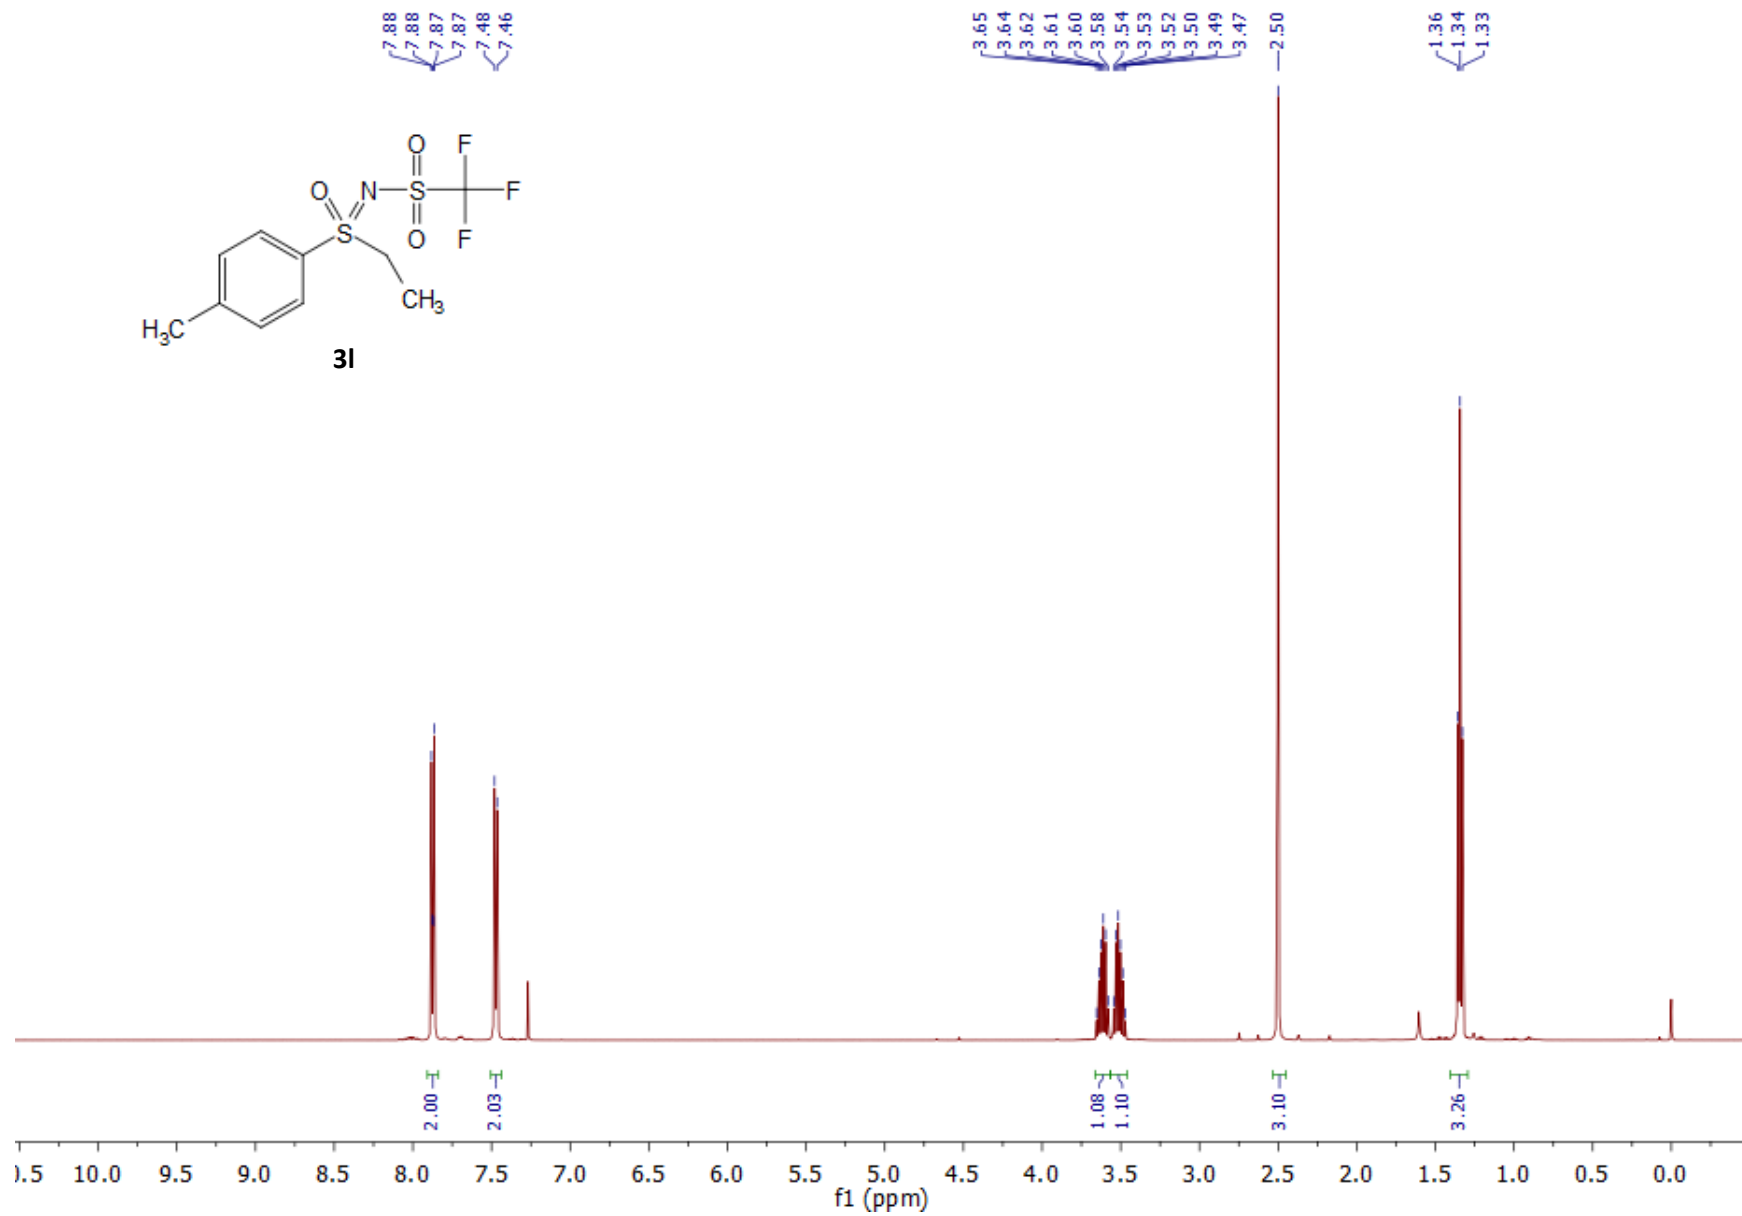

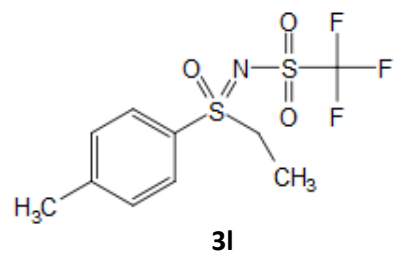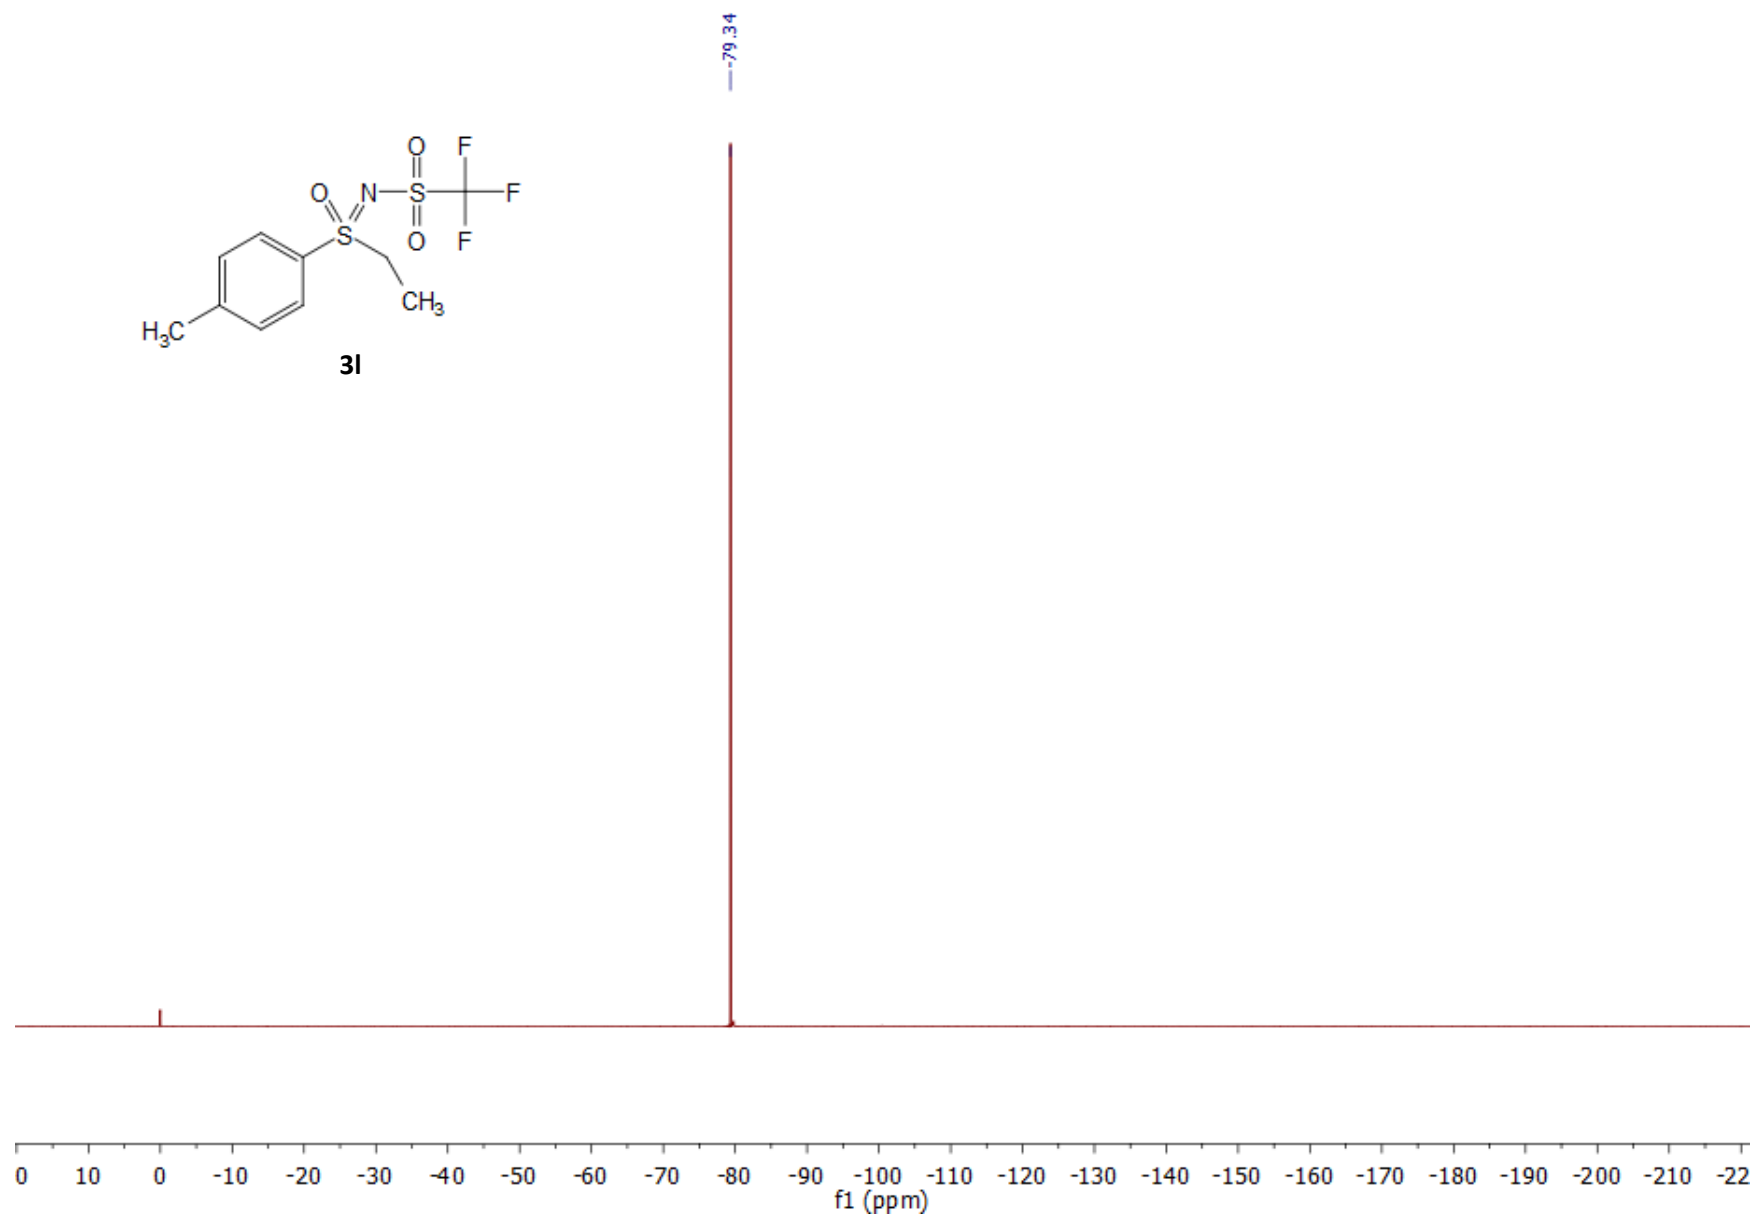



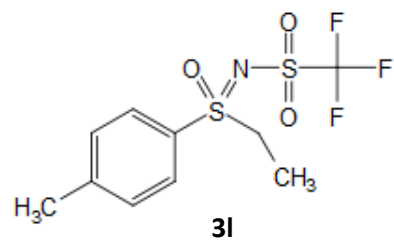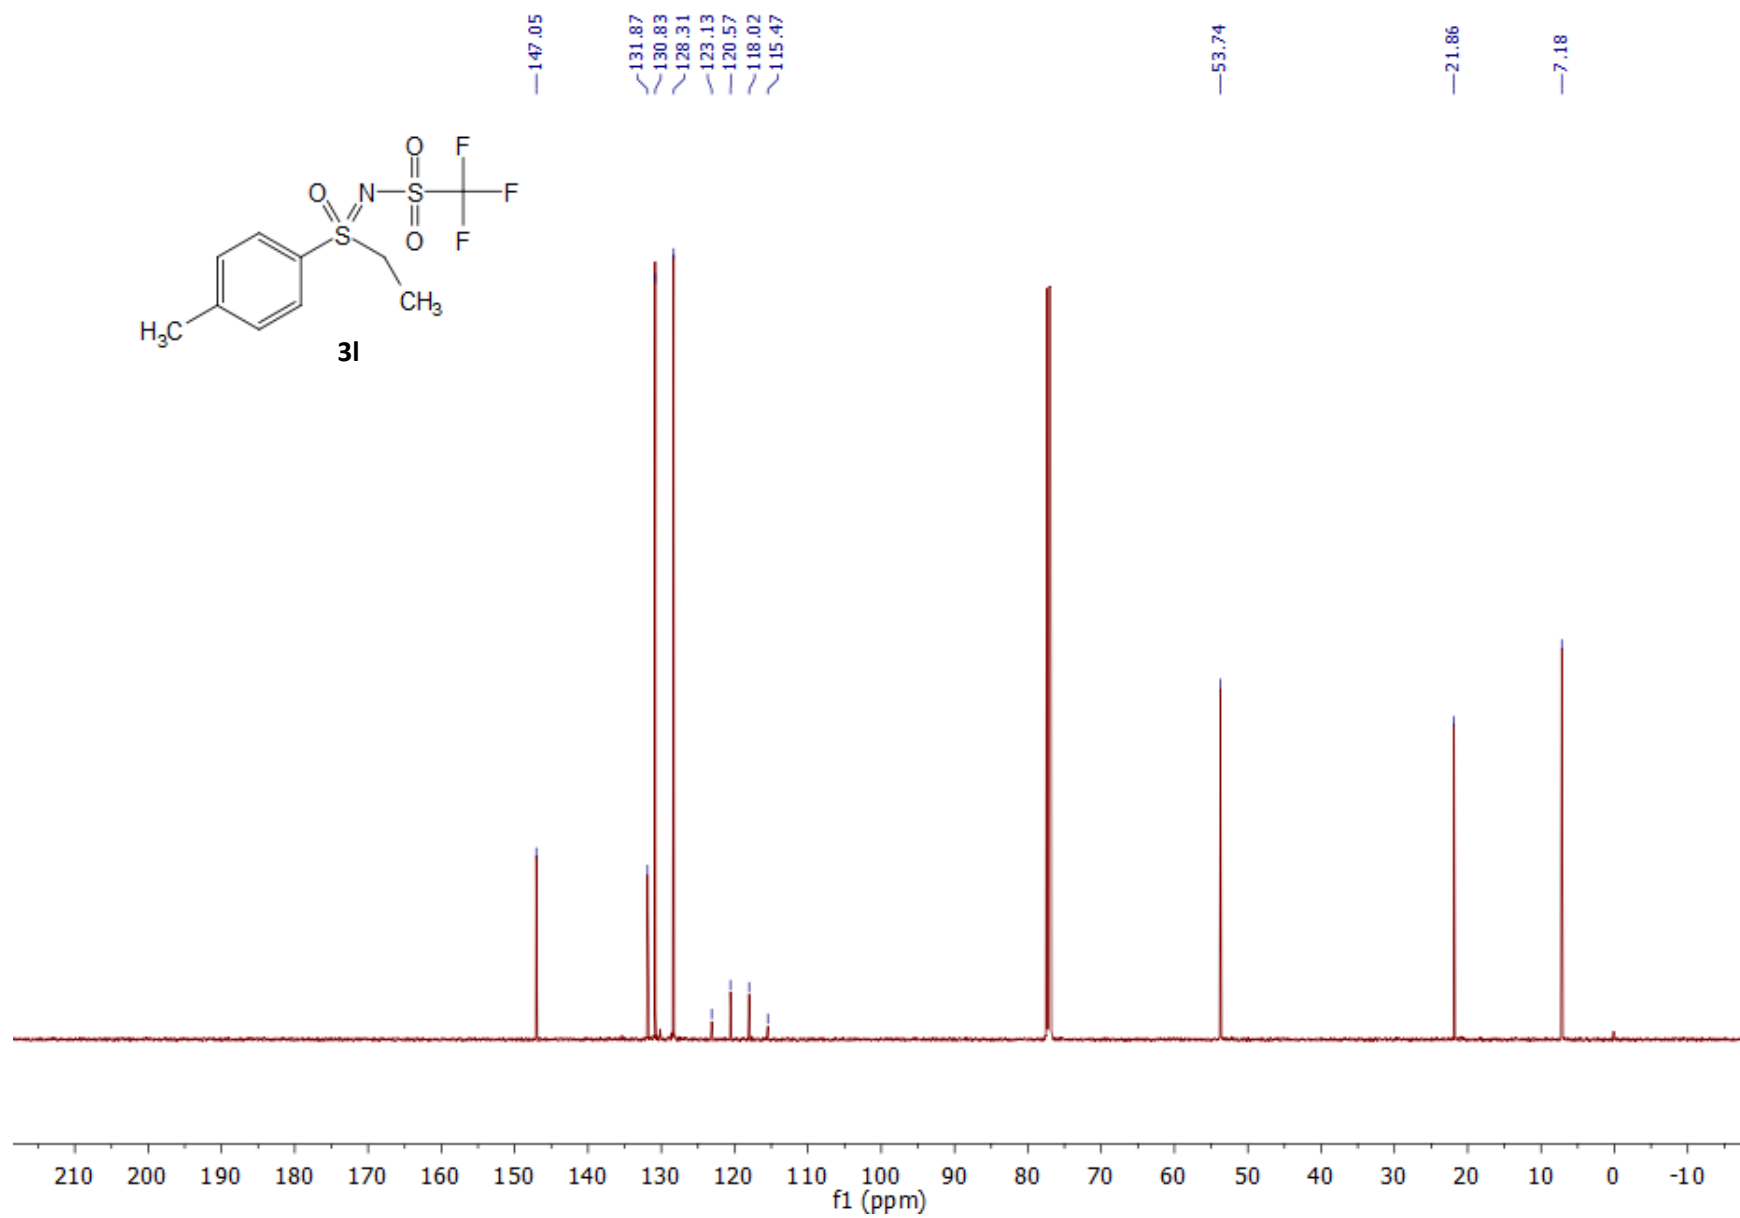

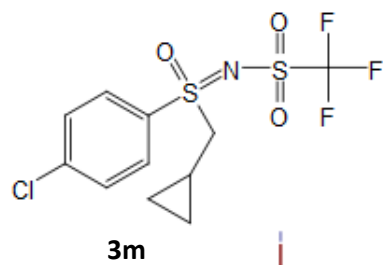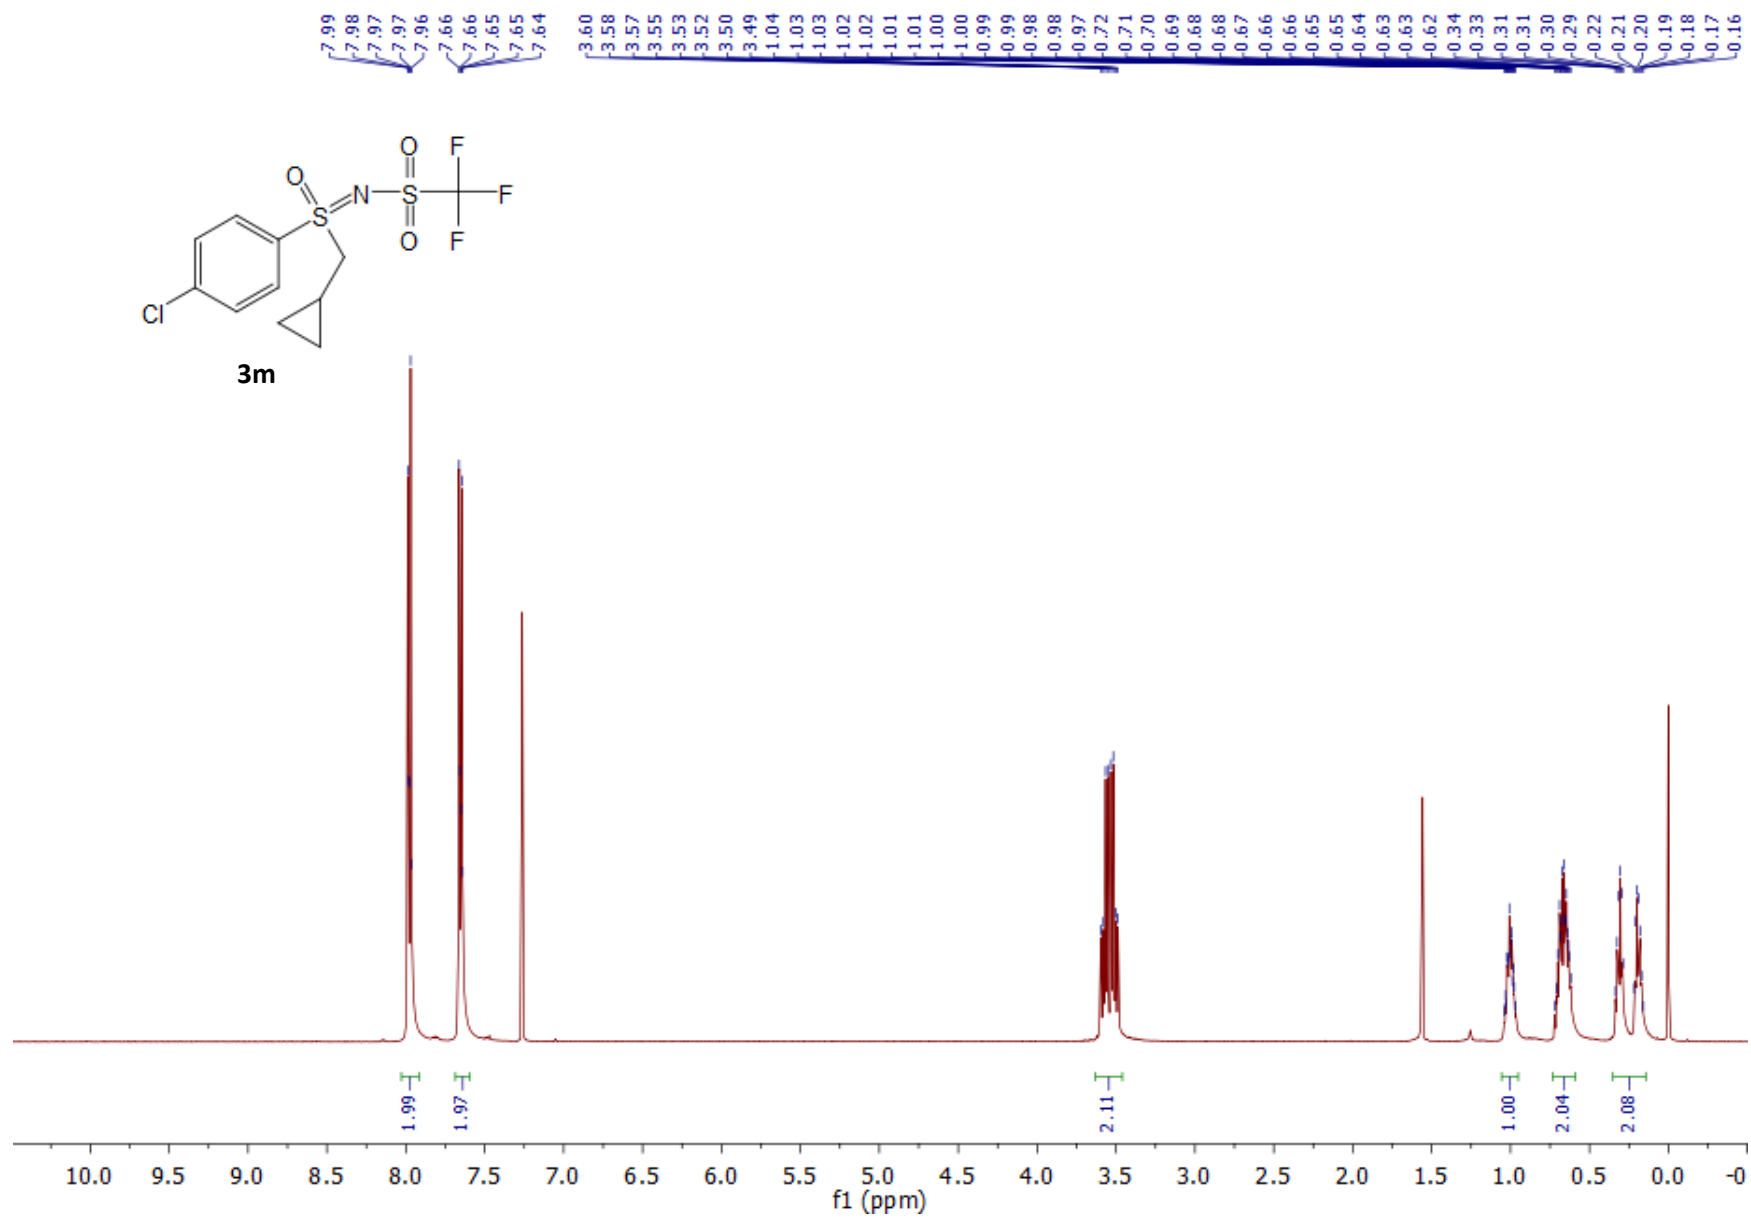

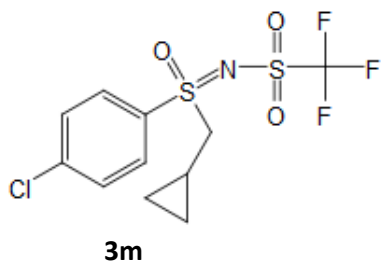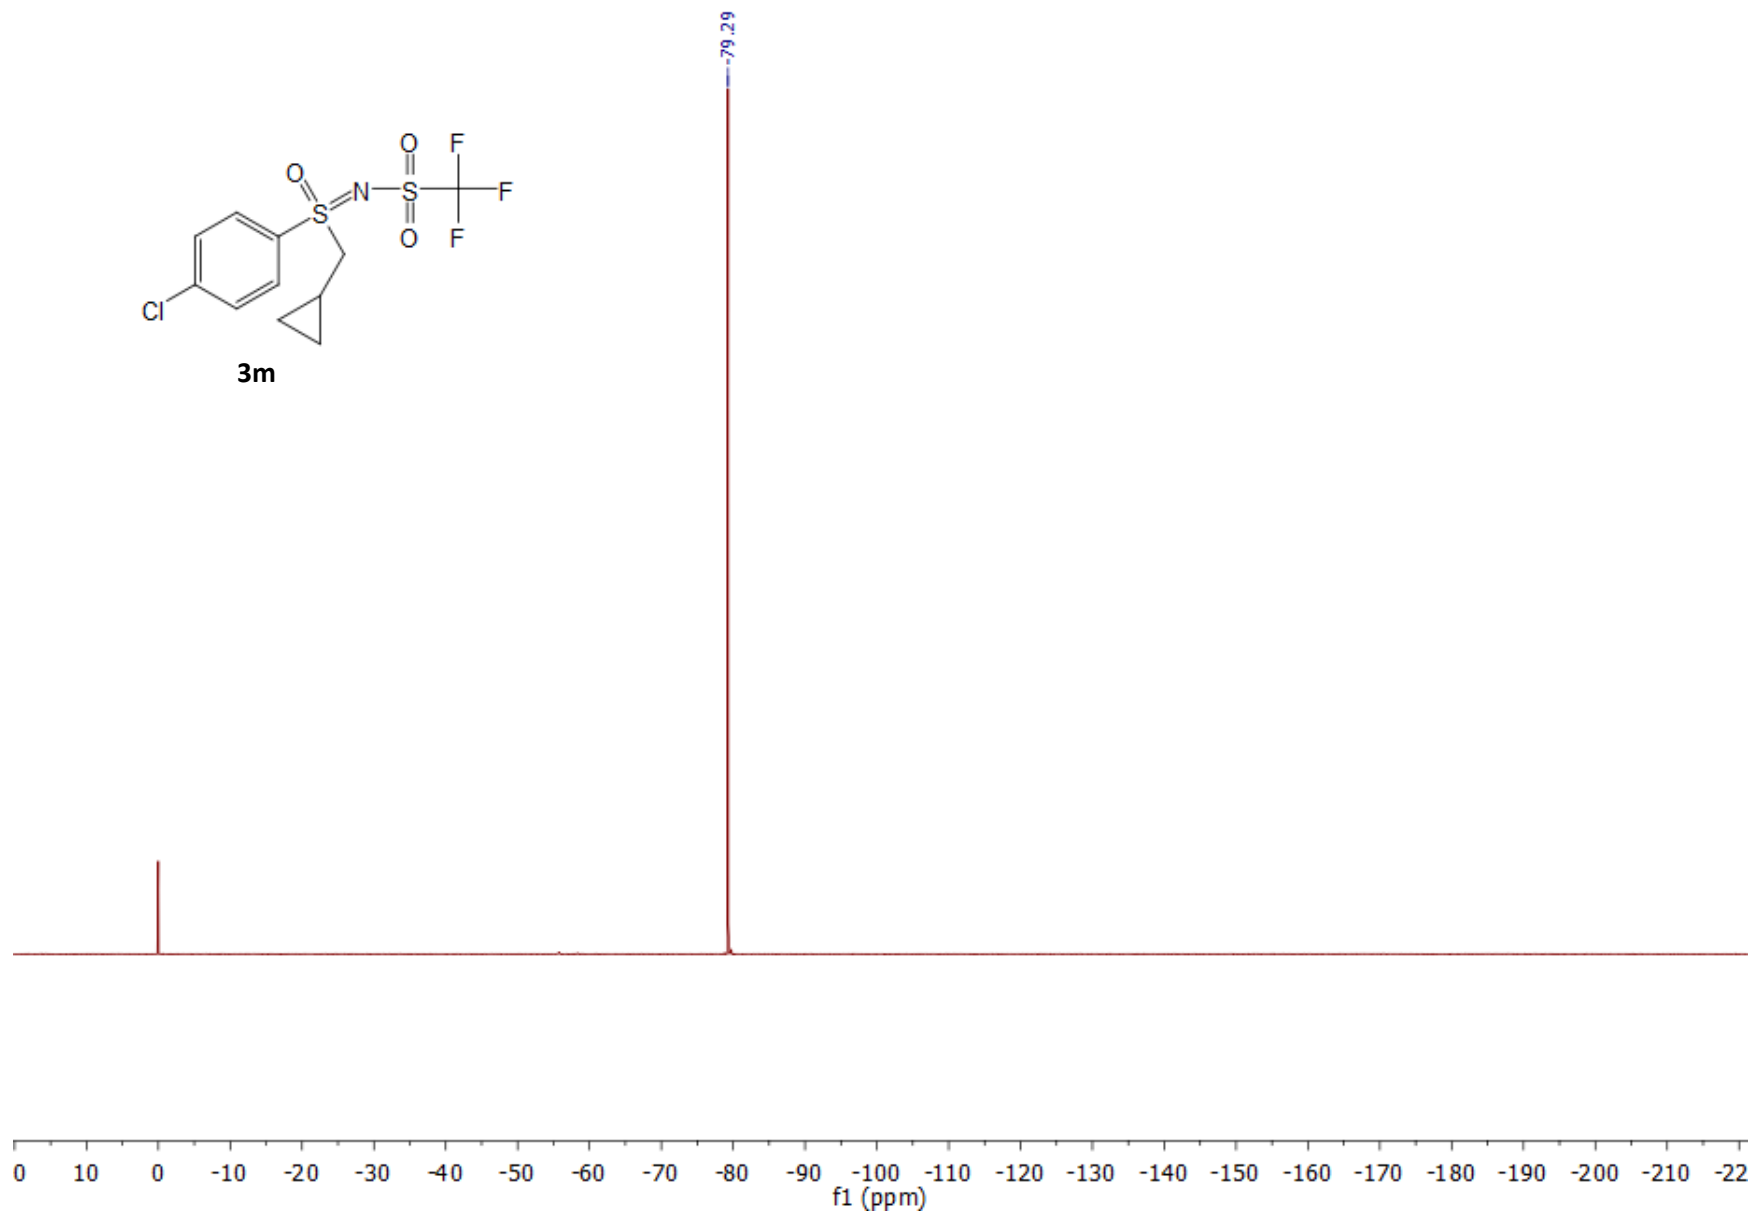

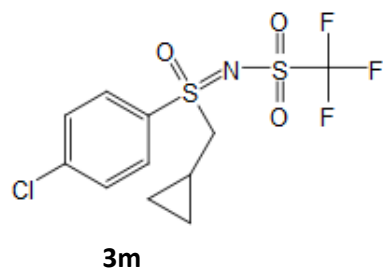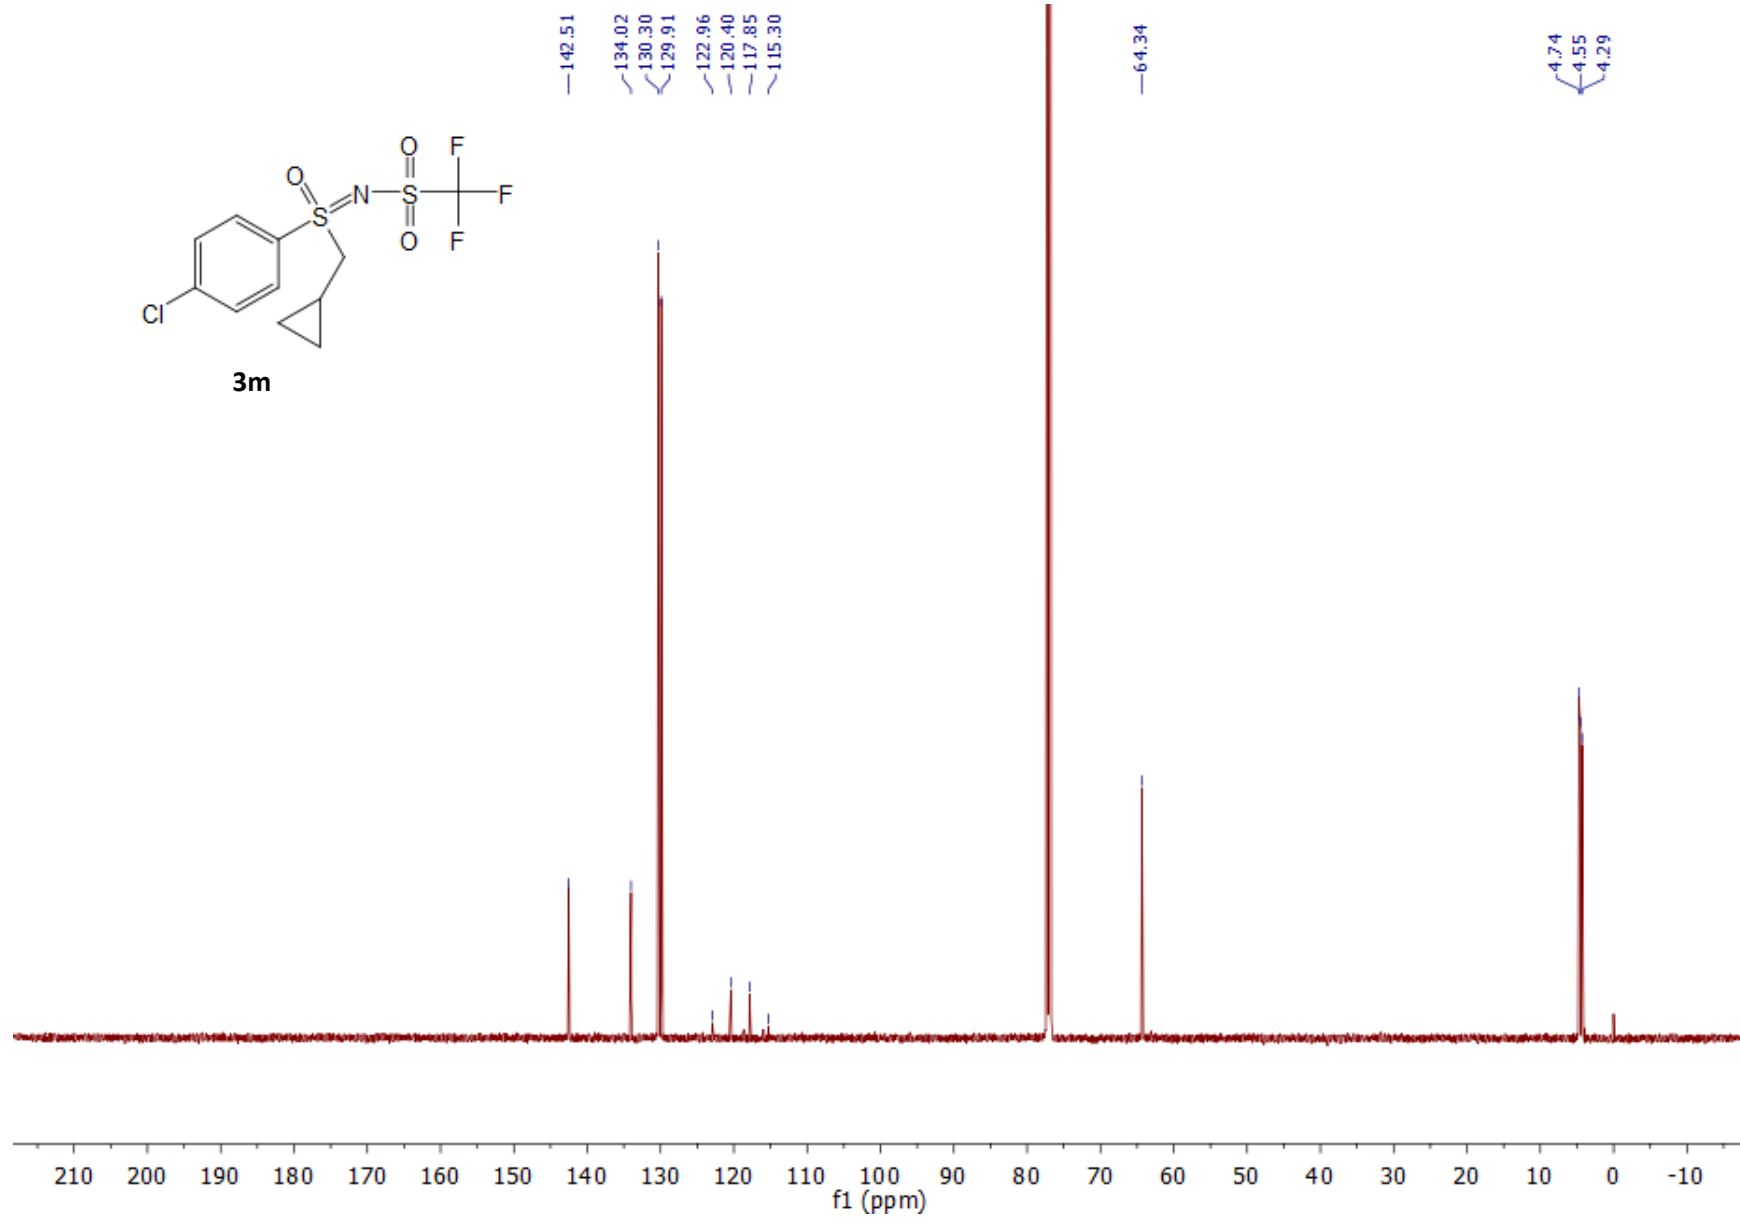

S60

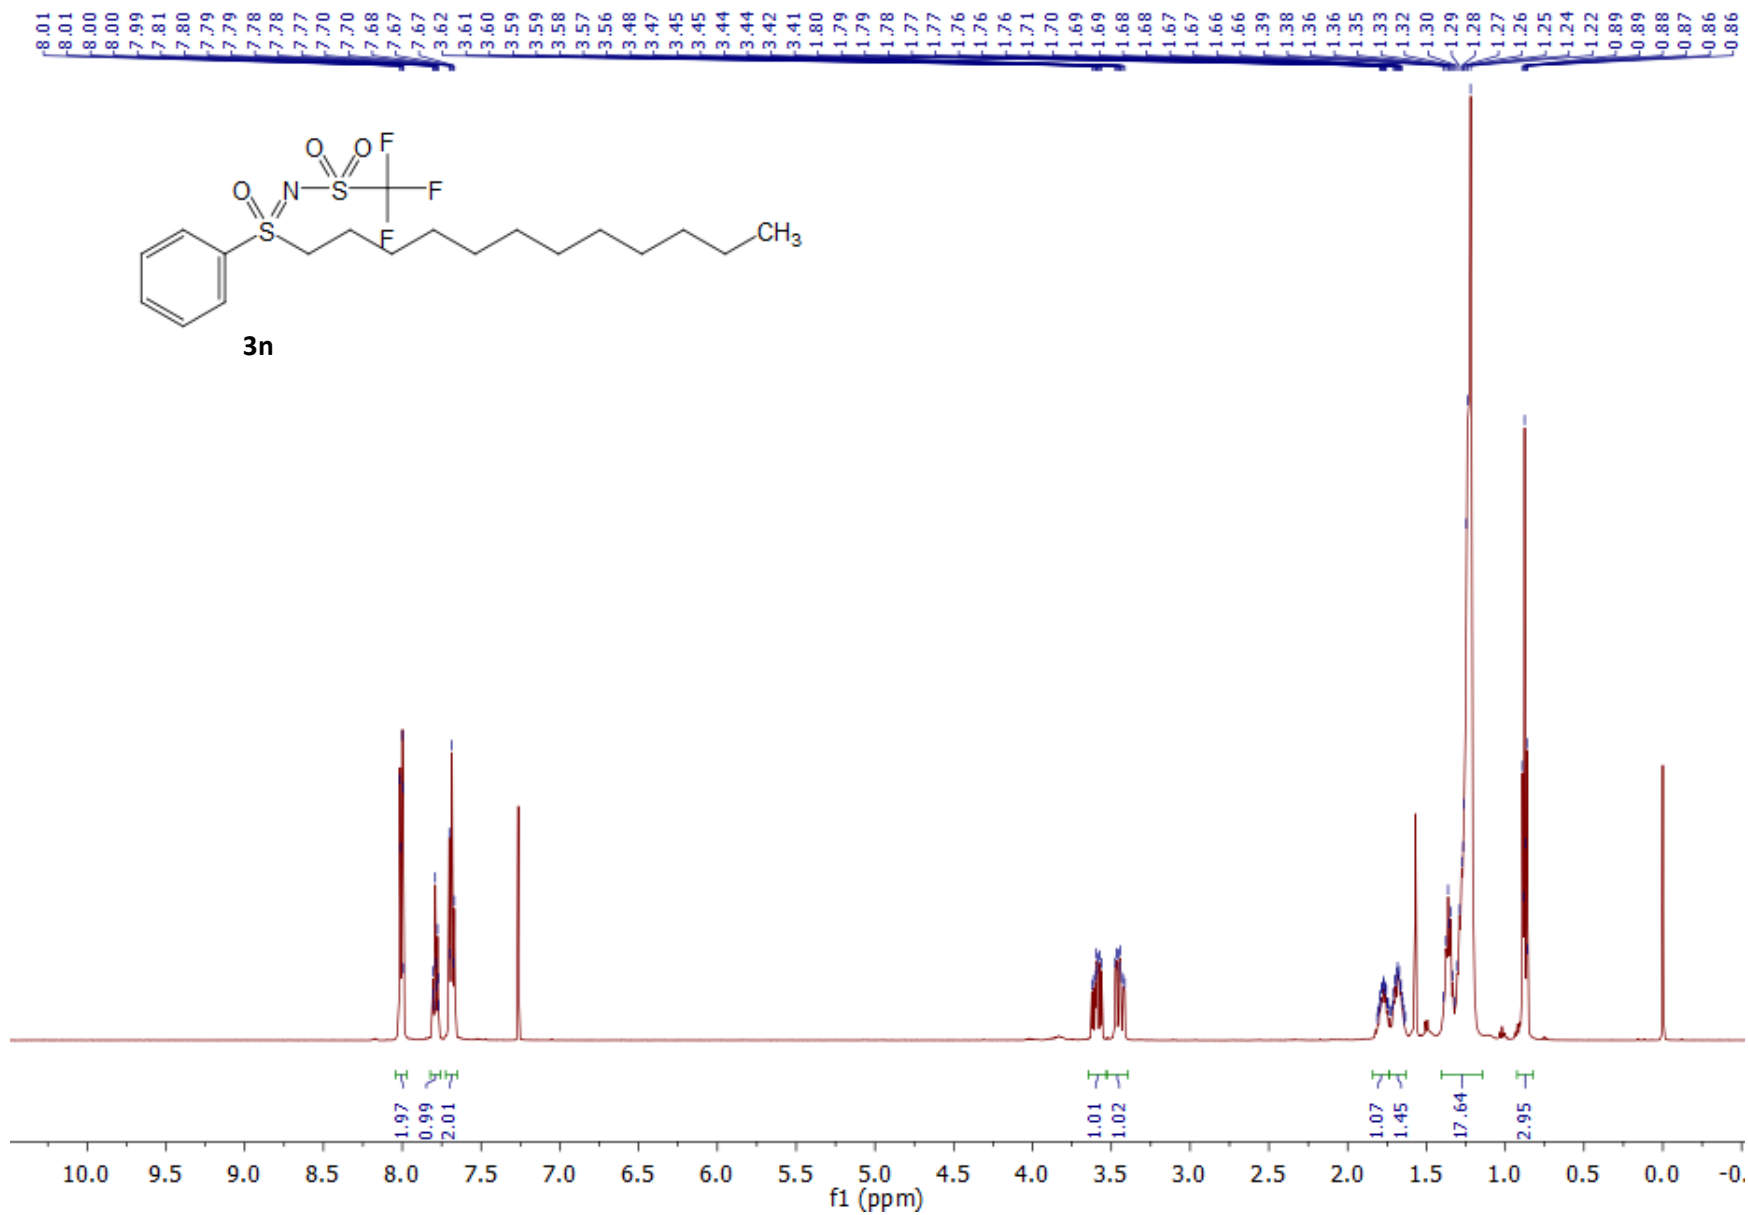

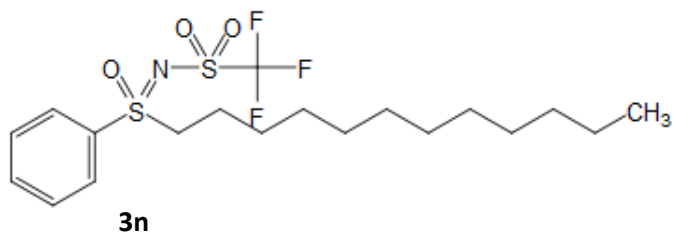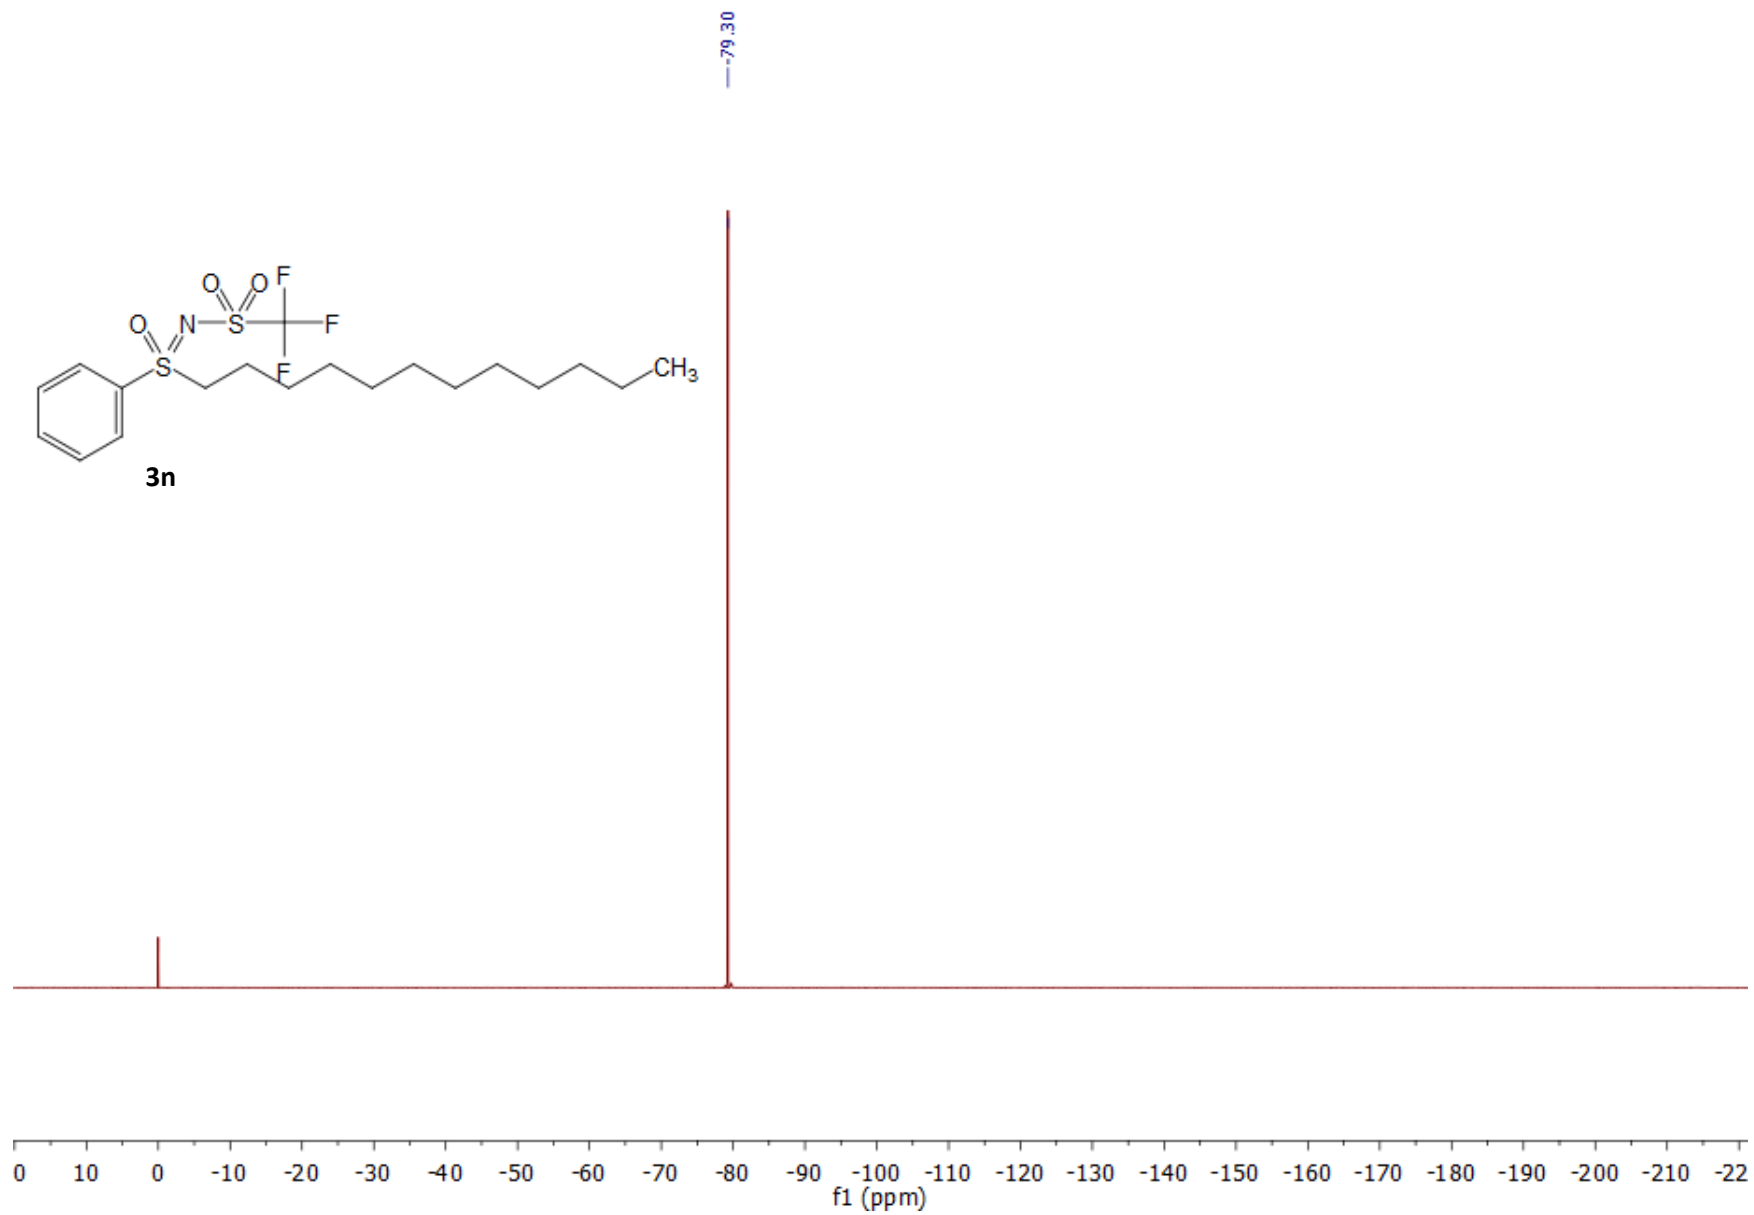

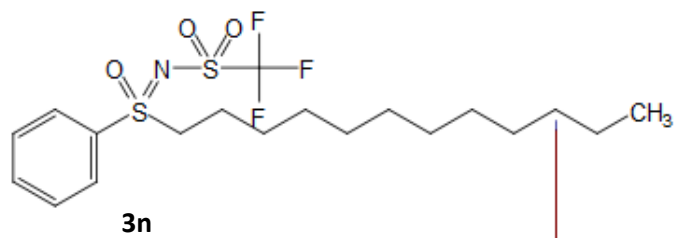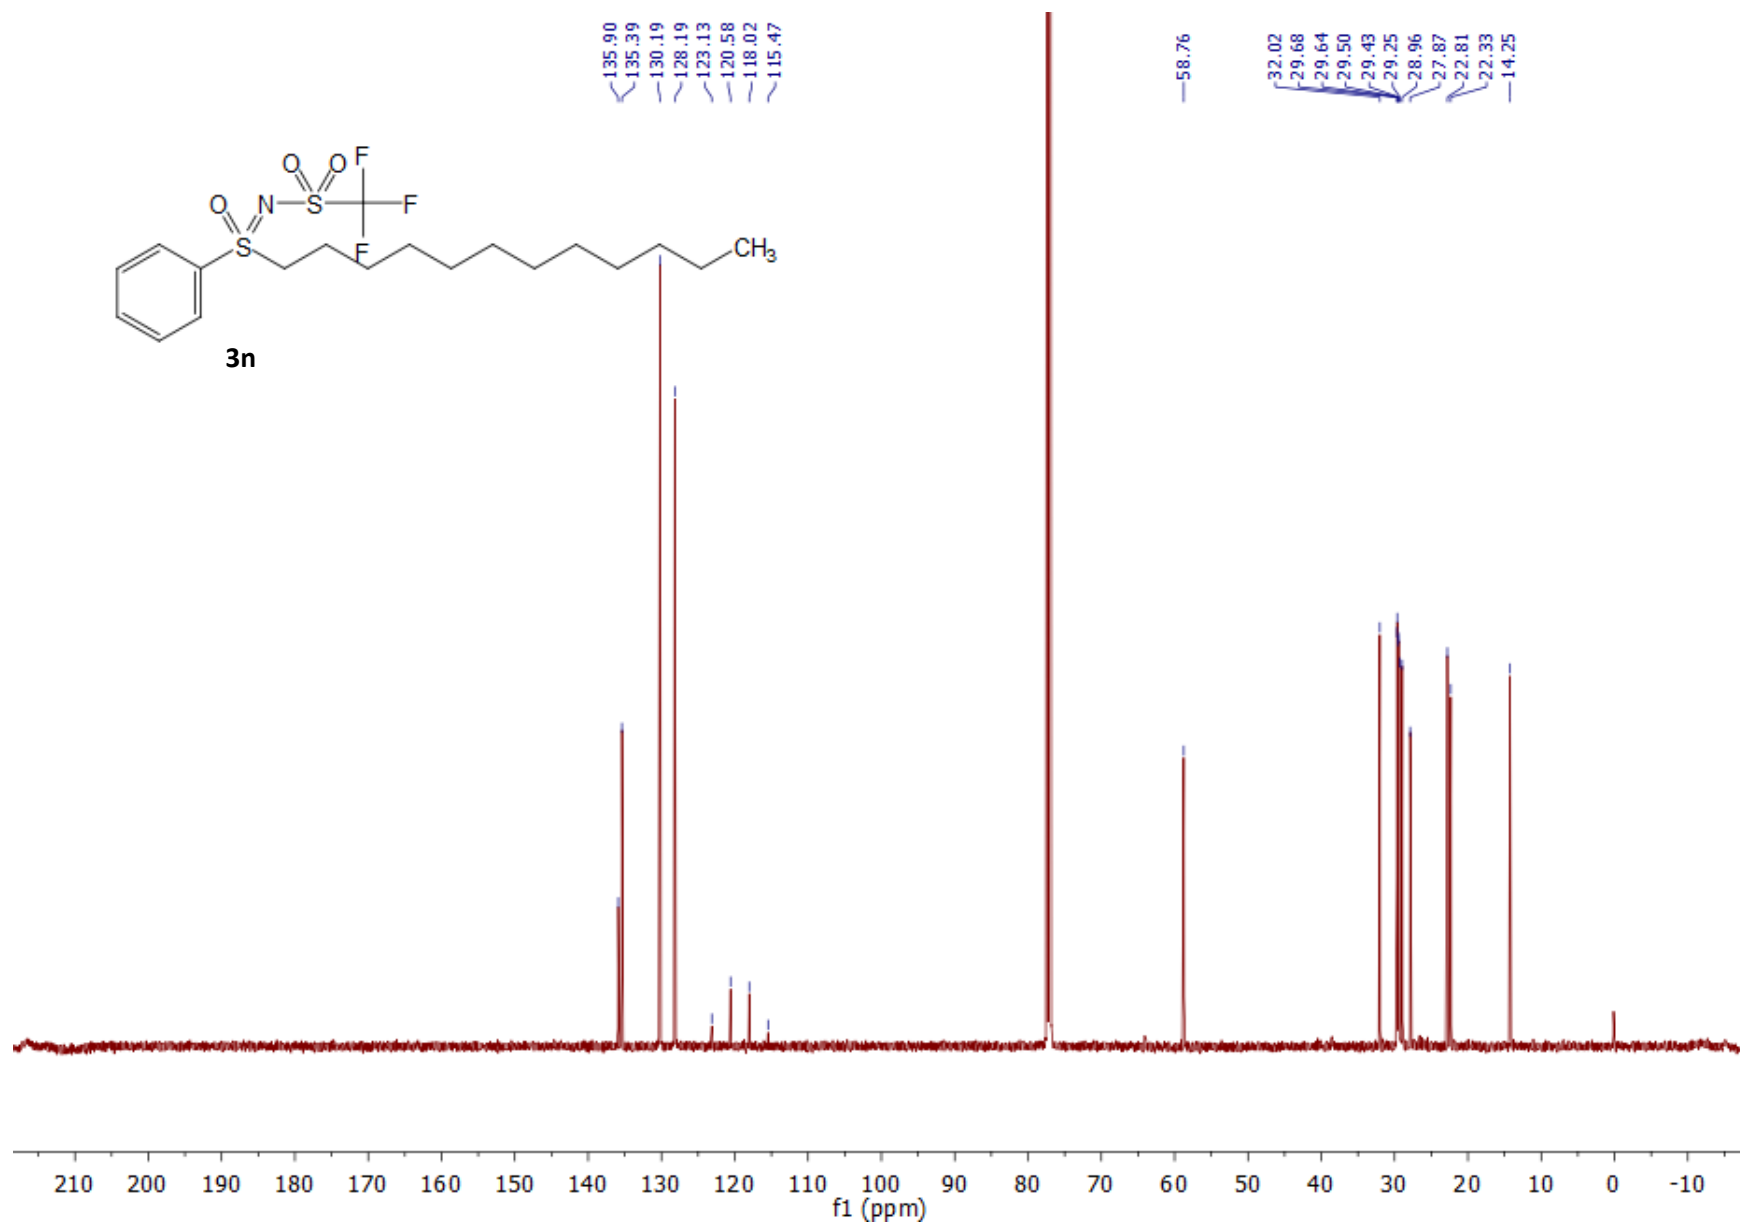

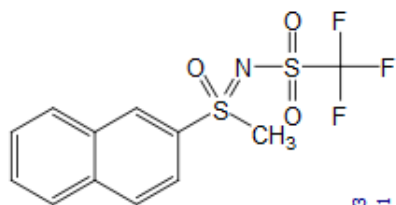

30

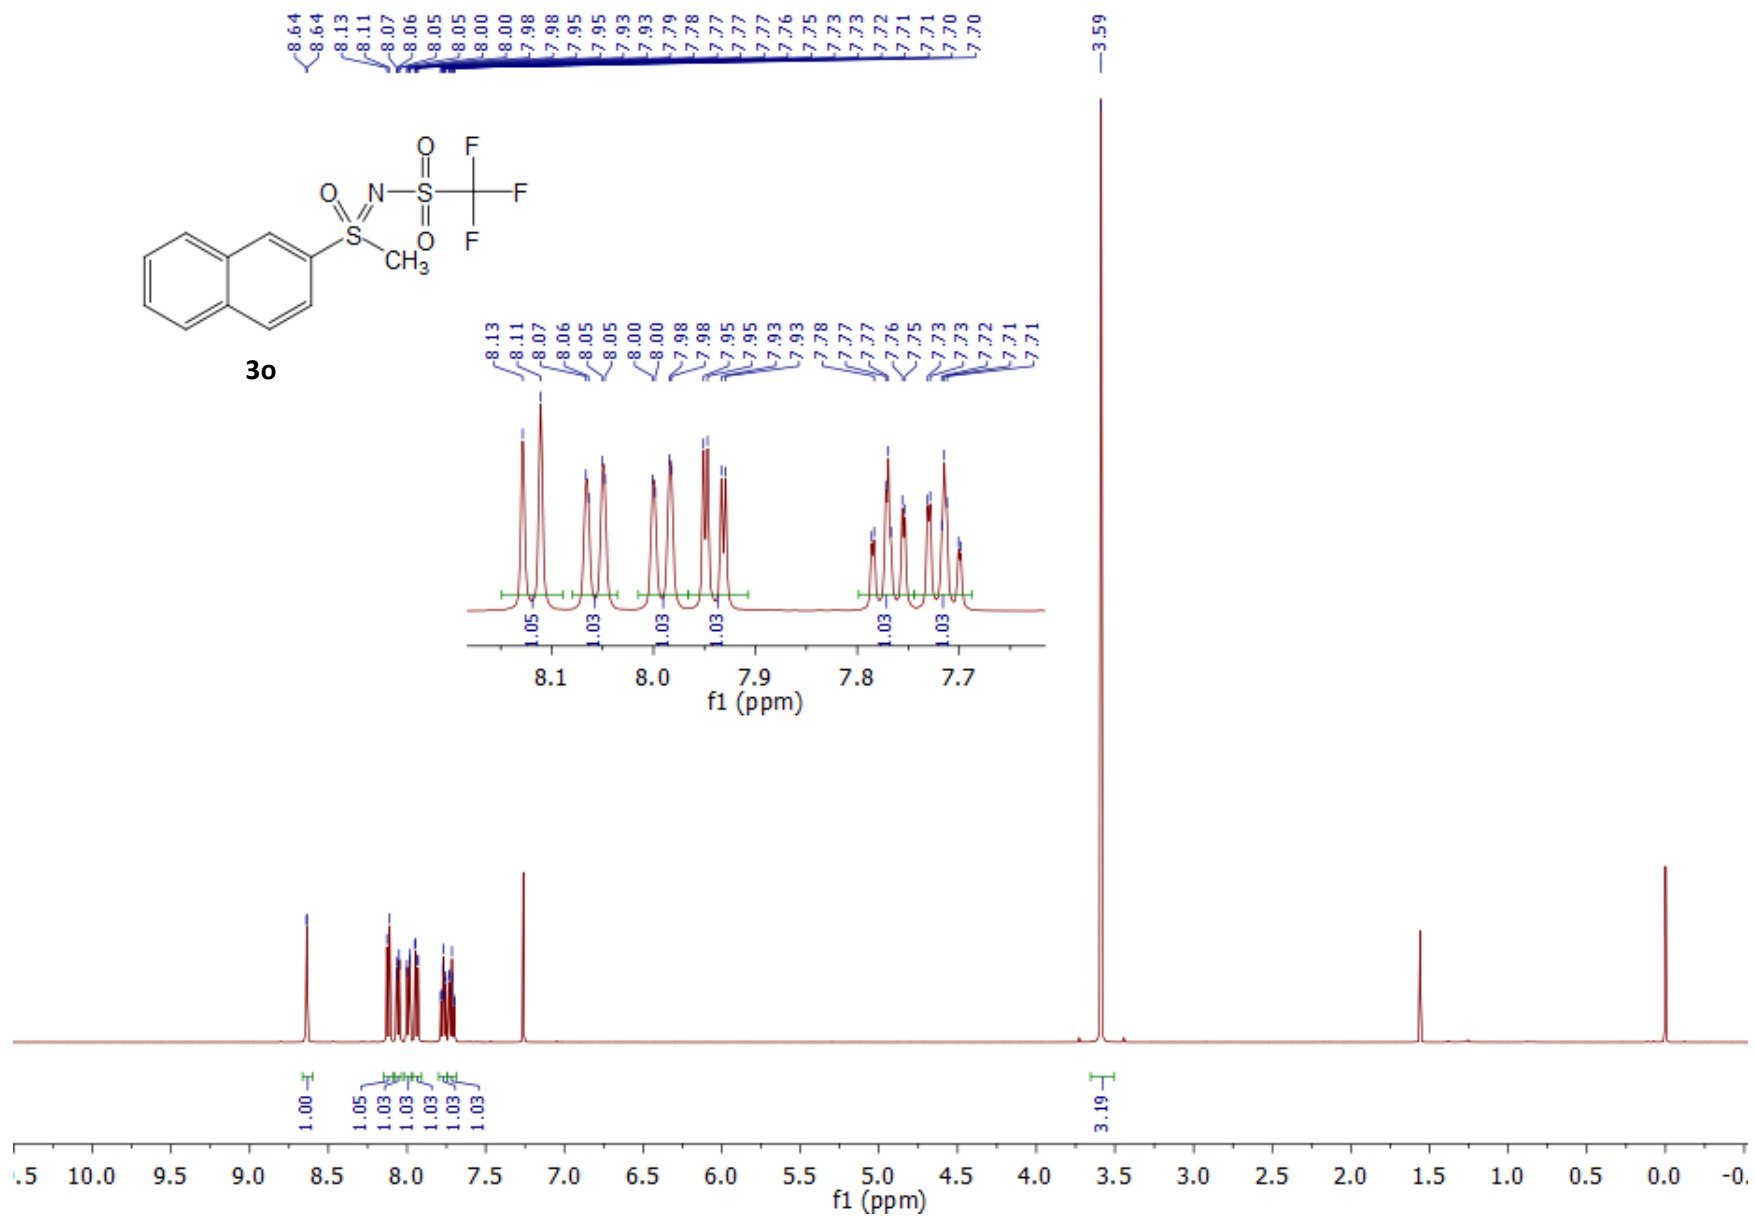



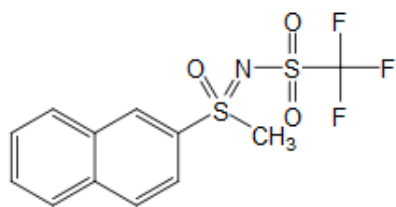

**30**

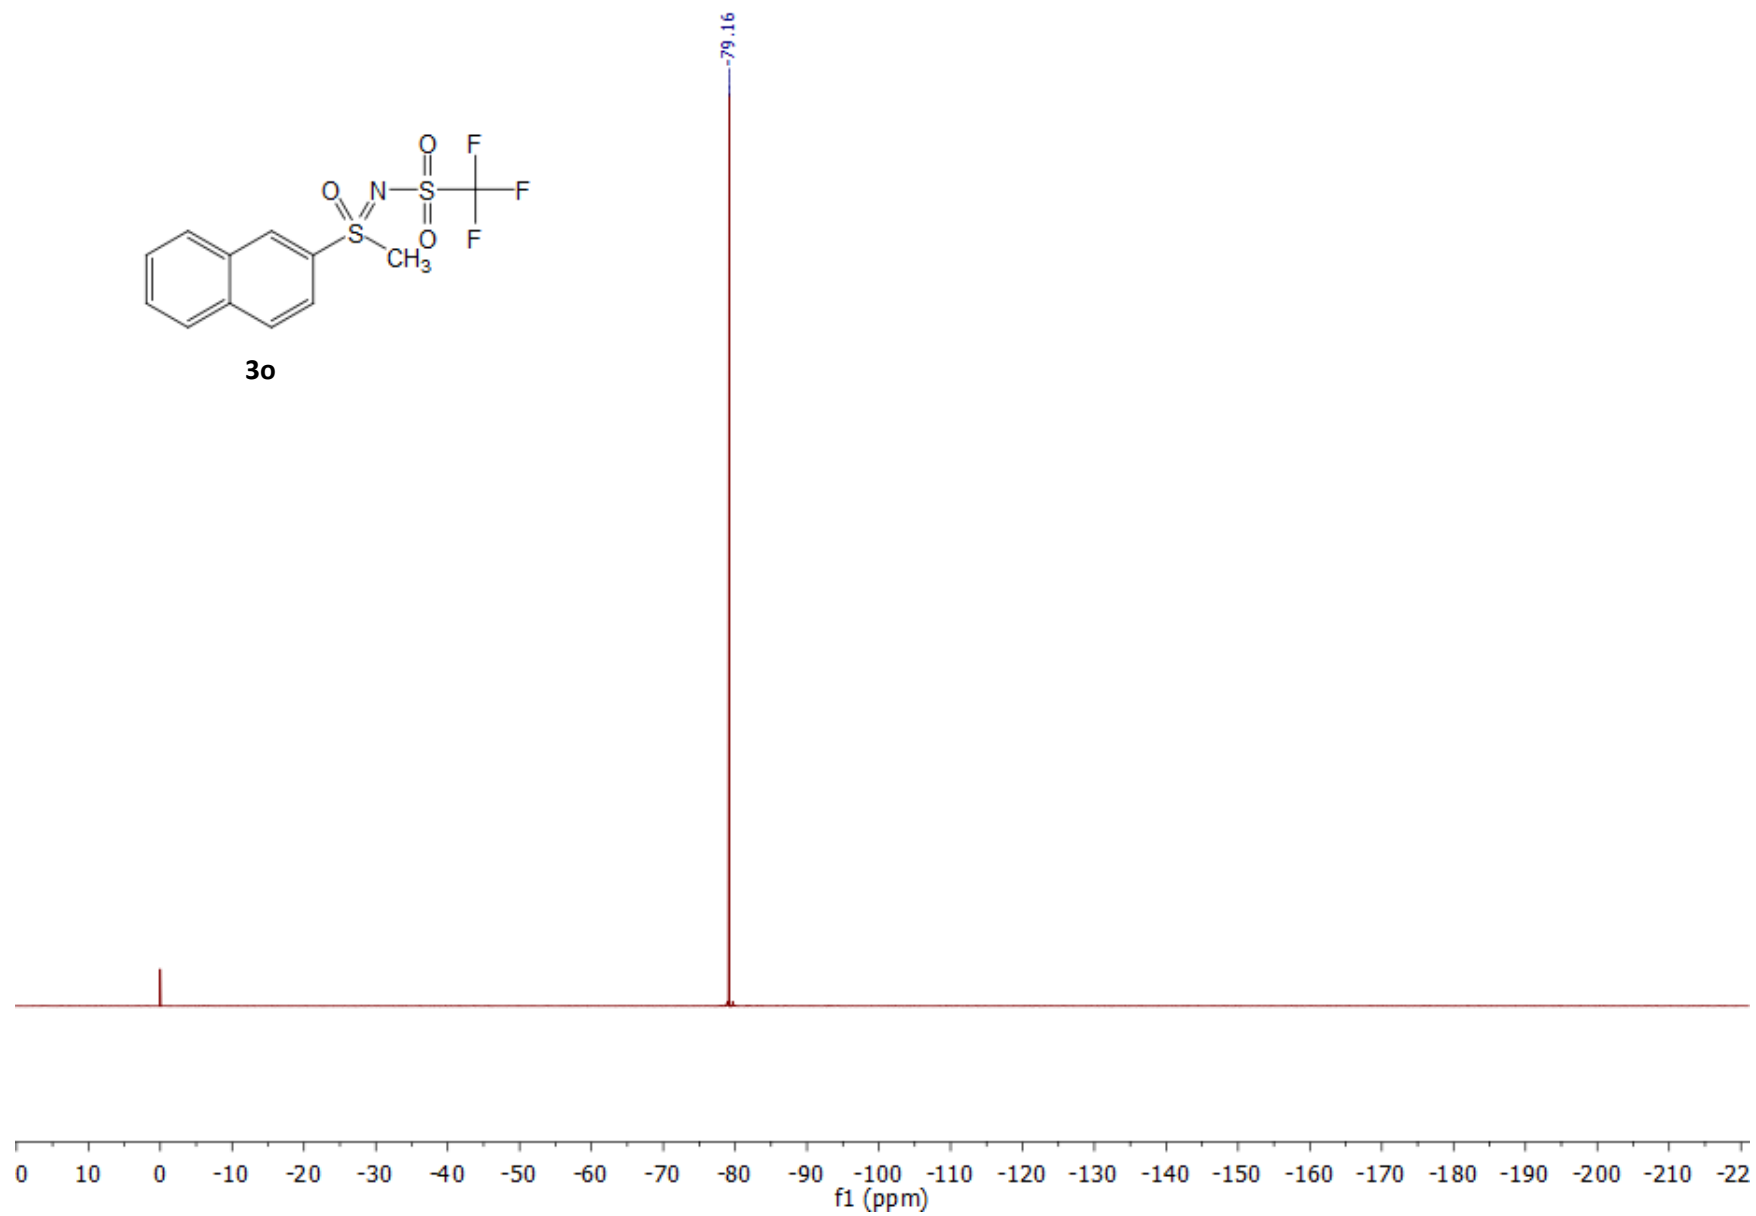

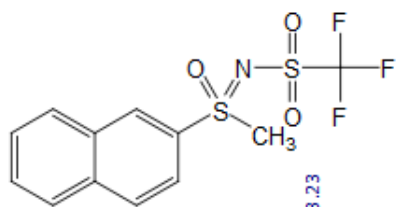

30

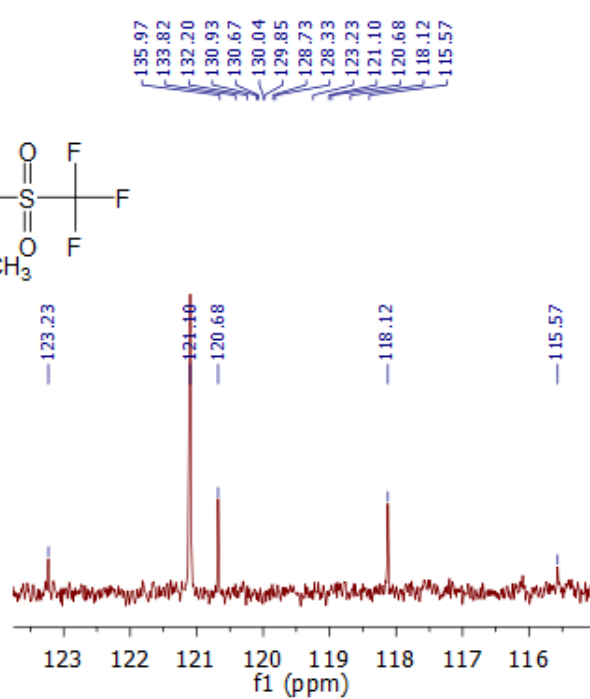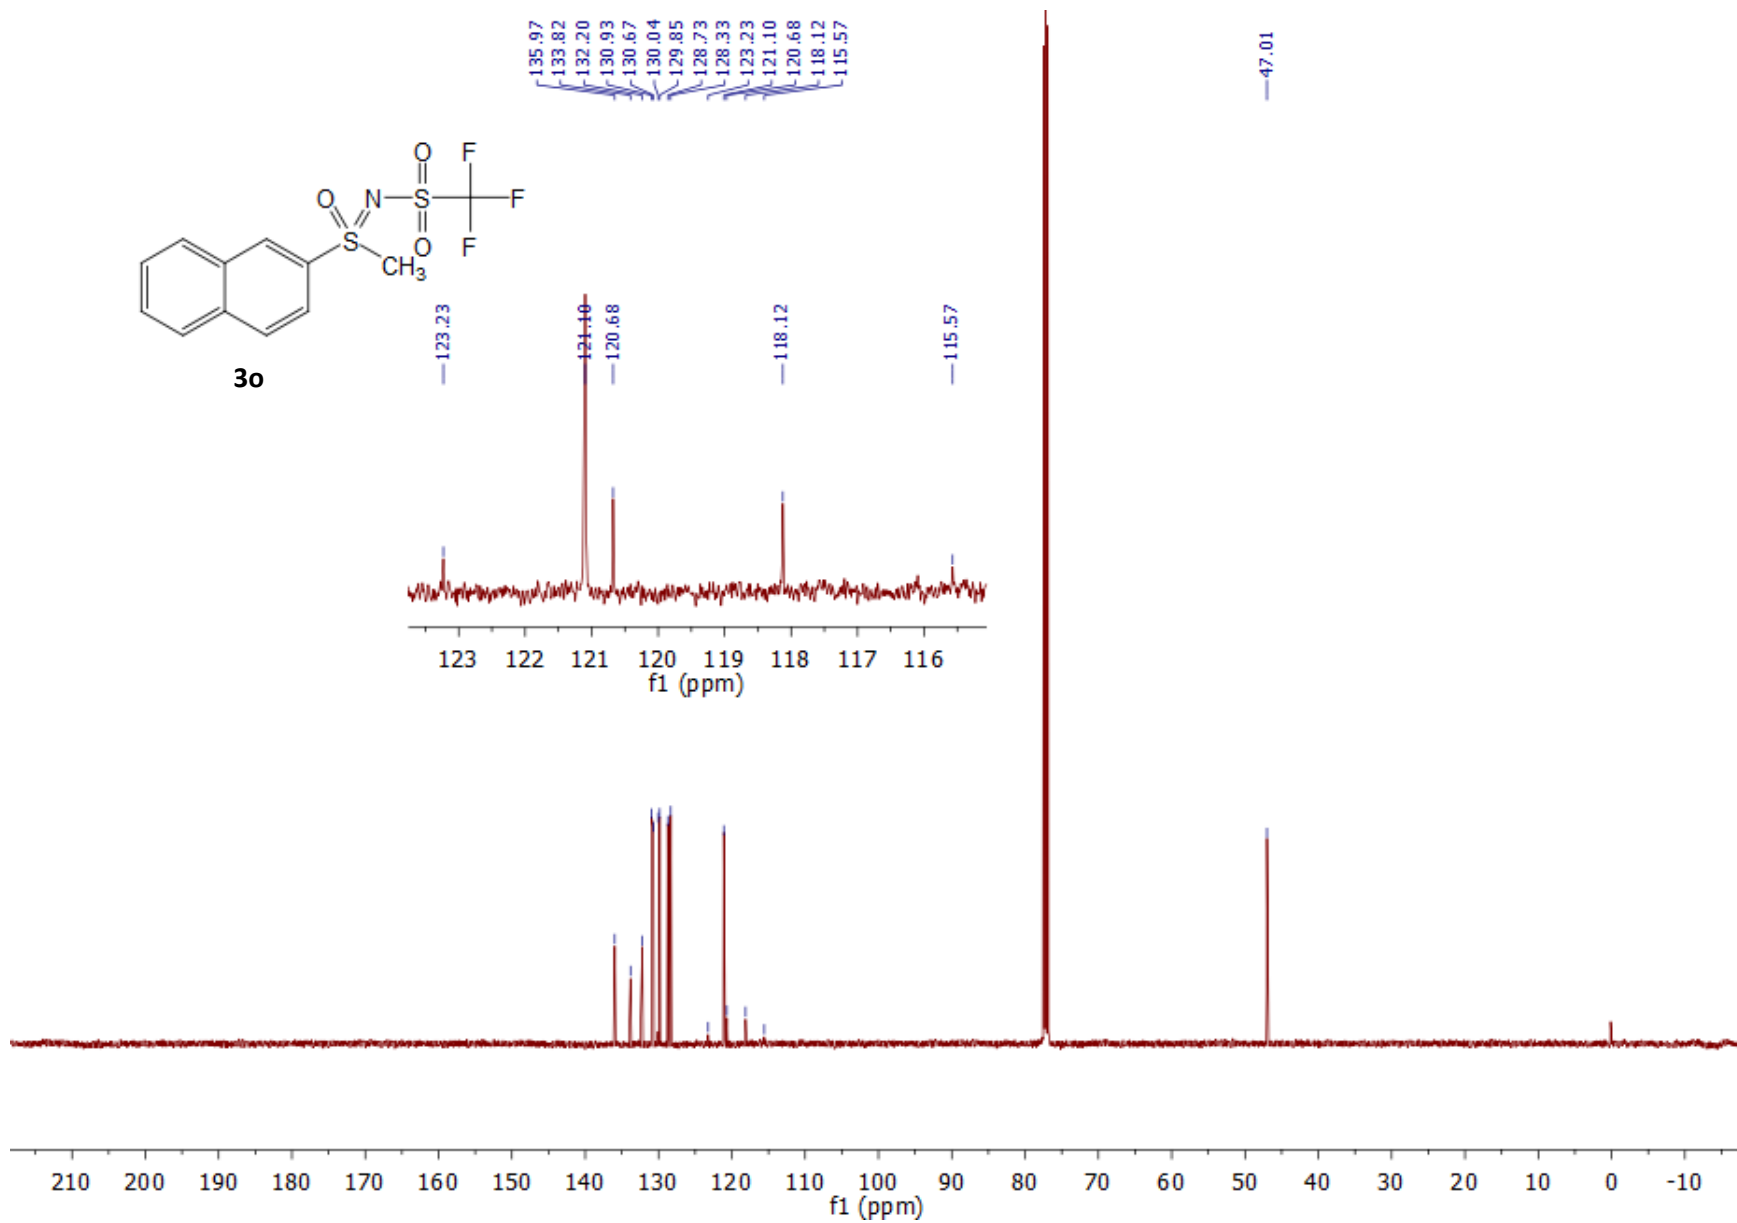

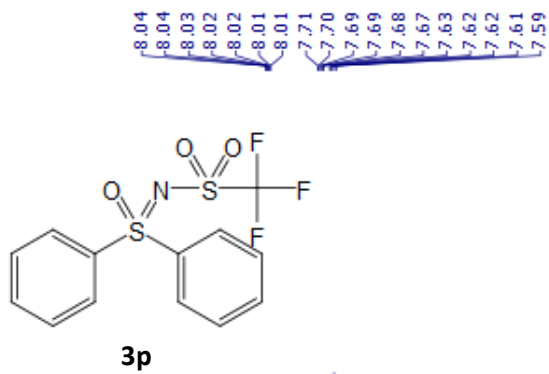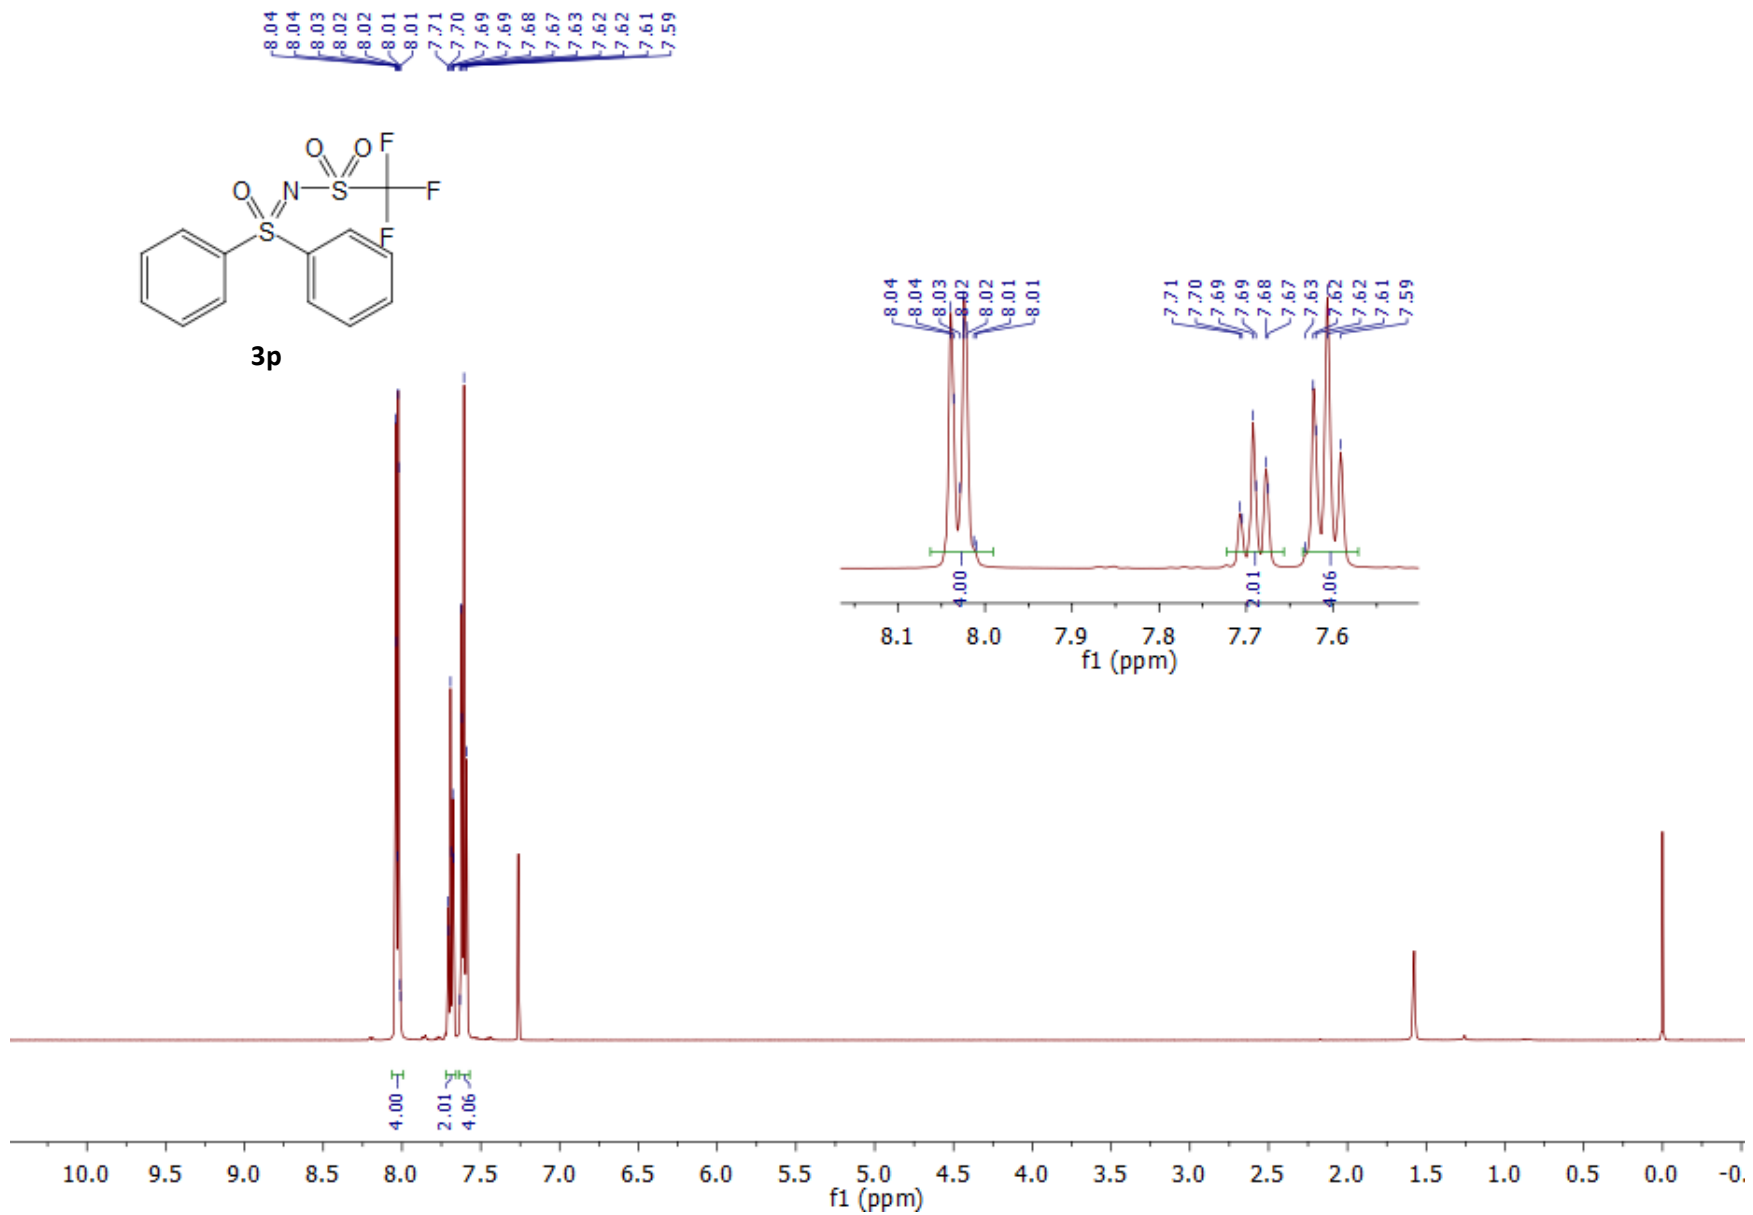

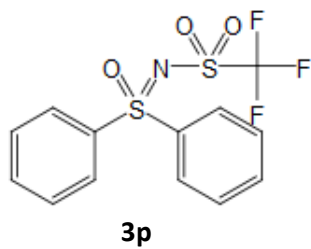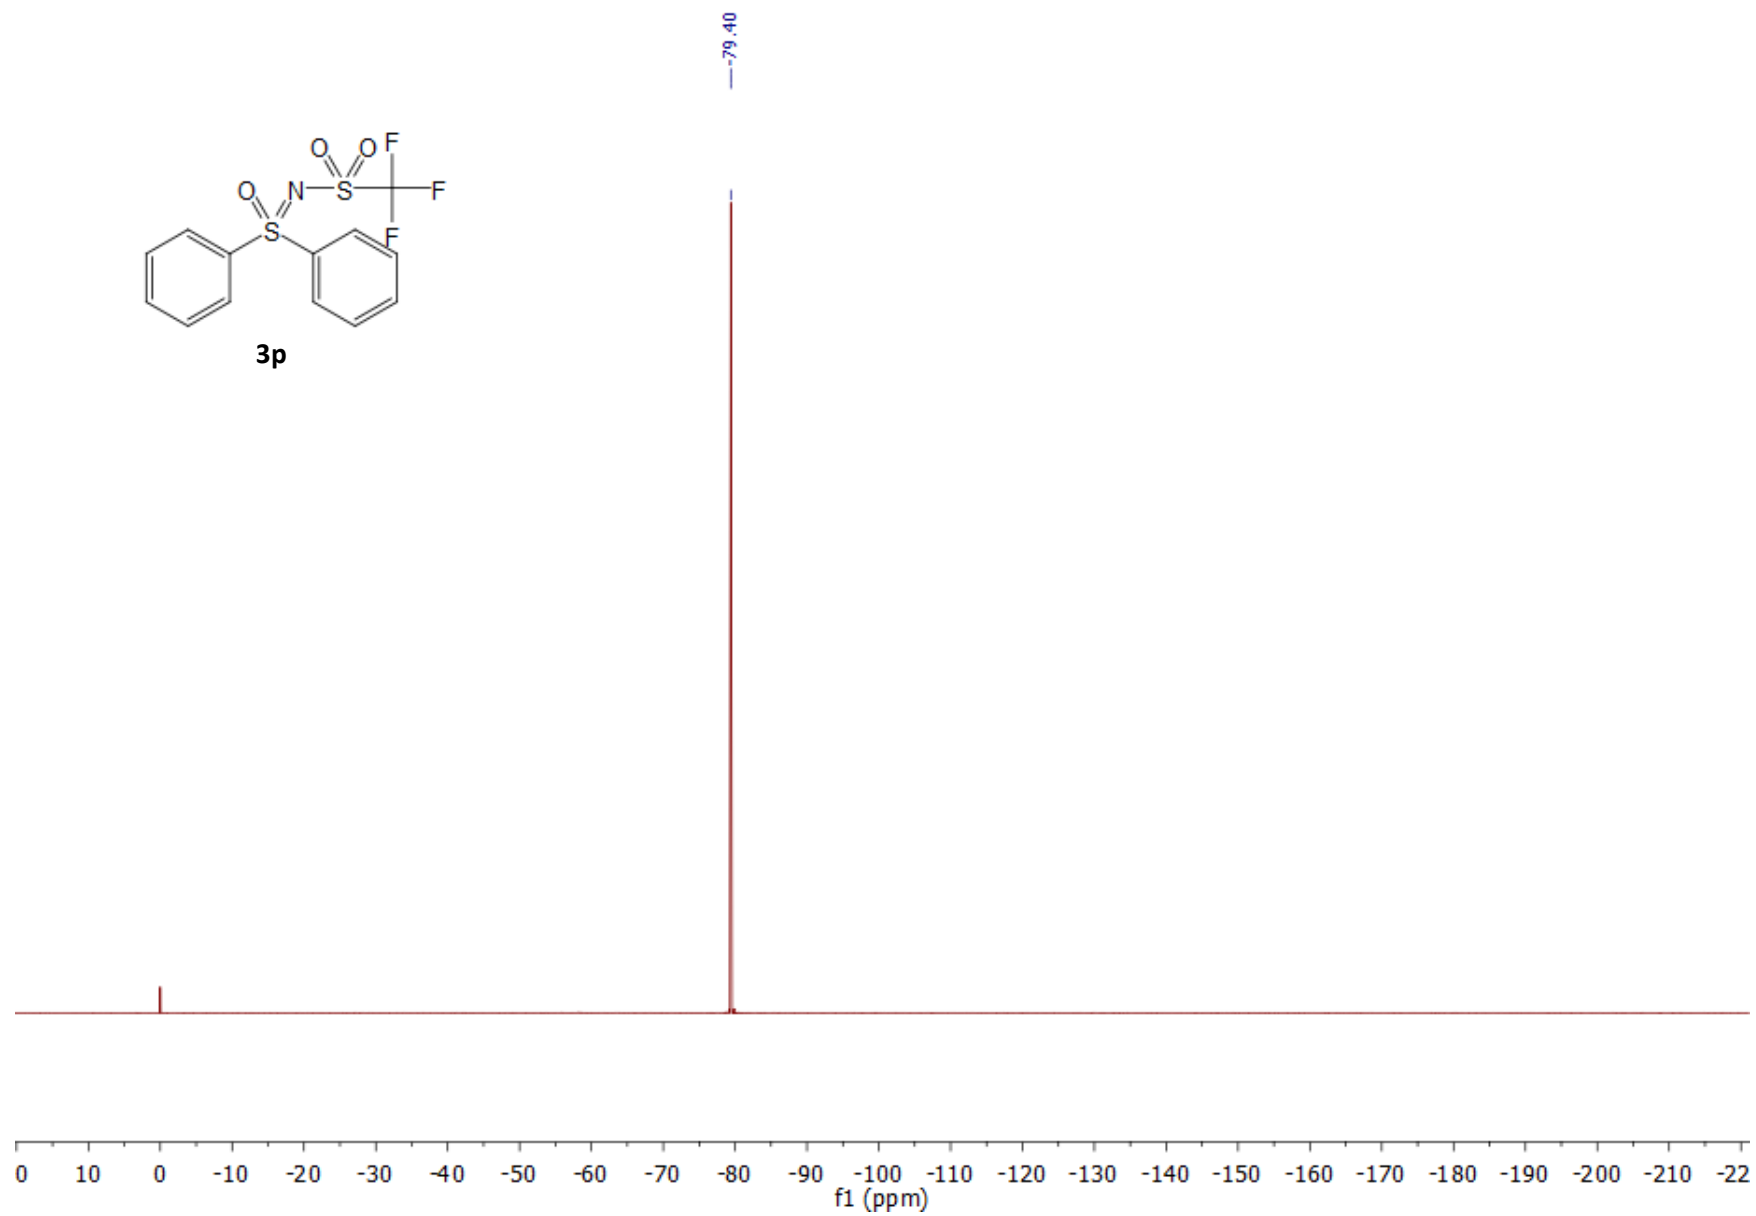

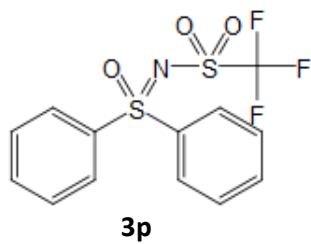

138.93  
134.89  
130.12  
127.67  
123.10  
120.55  
118.00  
115.44

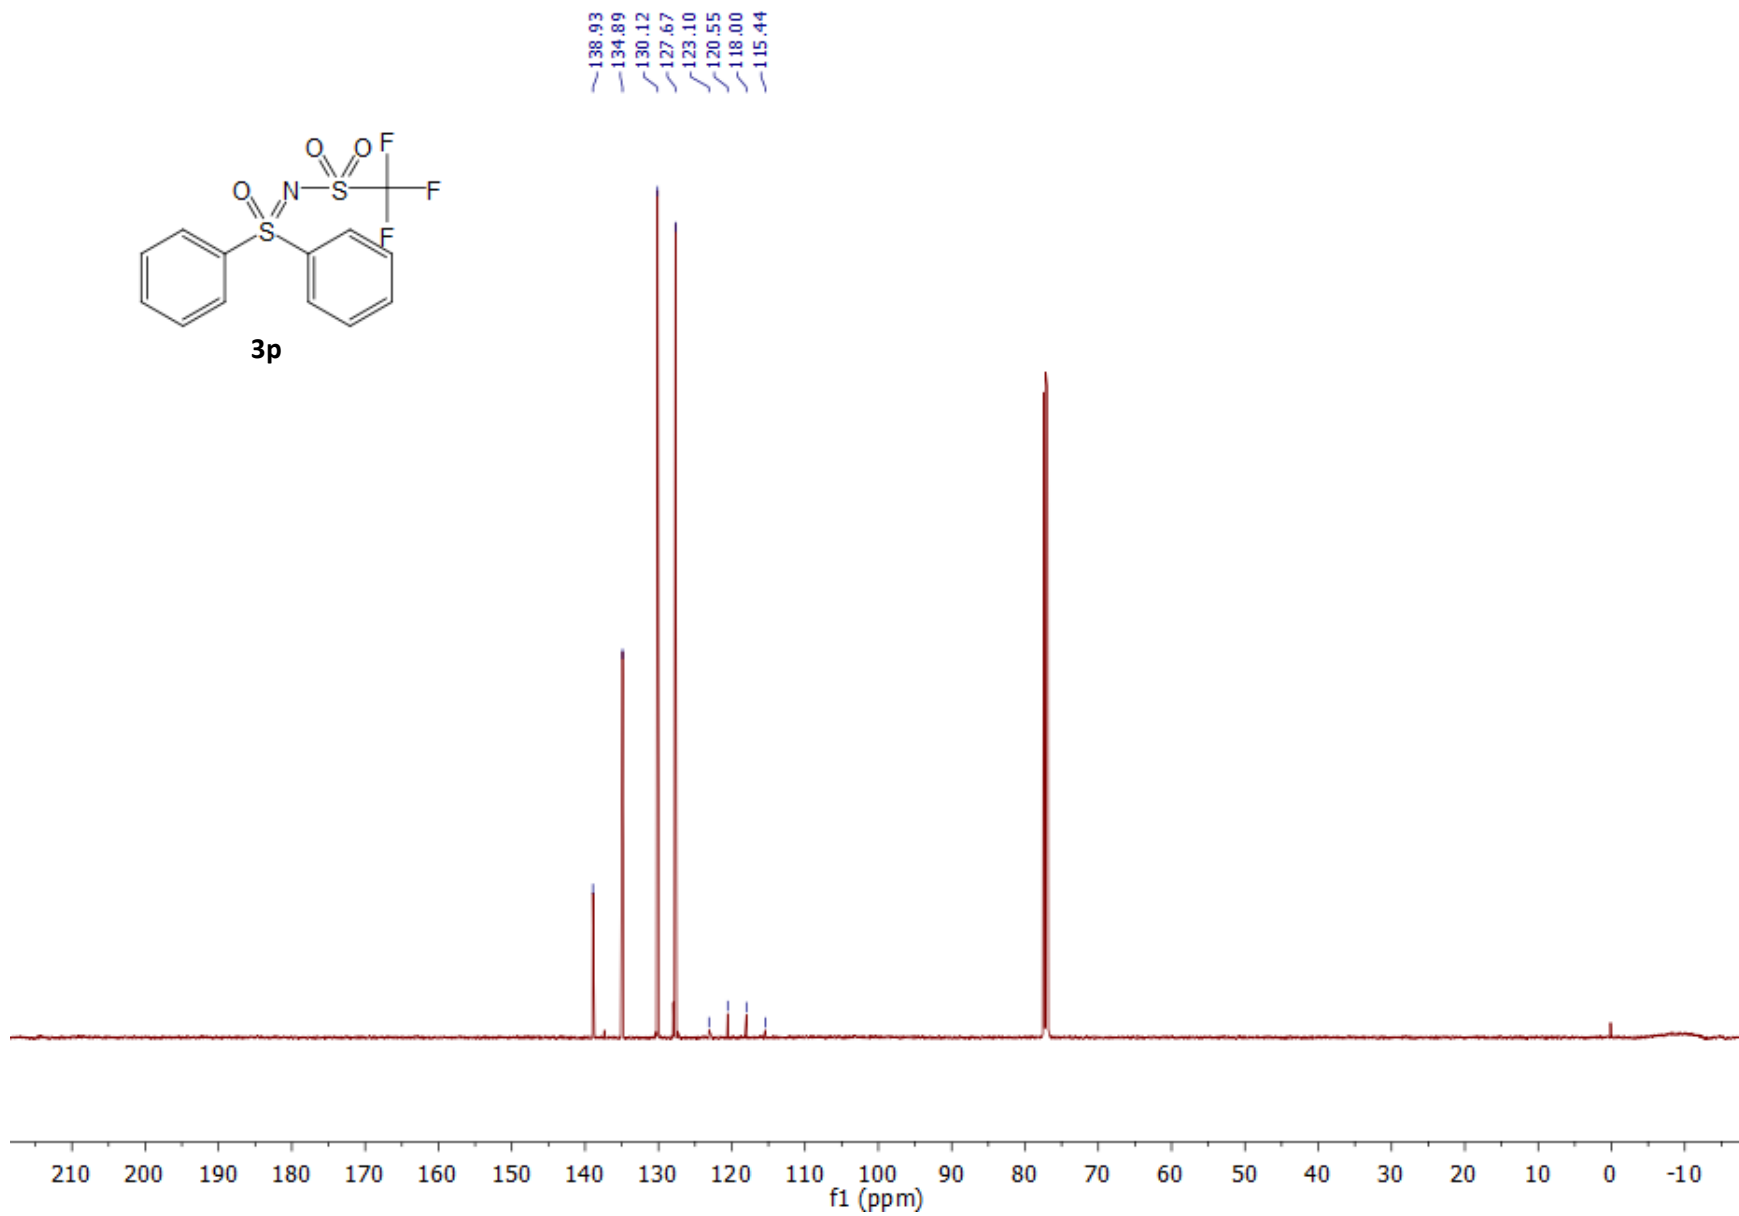

8.71  
8.71  
8.71  
8.70  
8.70  
8.69  
8.69  
8.34  
8.34  
8.34  
8.32  
8.32  
8.32  
8.32  
8.18  
8.17  
8.17  
8.16  
8.16  
8.16  
8.15  
8.15  
8.04  
8.03  
8.02  
8.02  
8.01  
8.00  
7.75  
7.75  
7.74  
7.74  
7.72  
7.72  
7.72  
7.65  
7.65  
7.64  
7.64  
7.63  
7.63  
7.62  
7.61  
7.61  
7.57  
7.57  
7.56  
7.56  
7.56  
7.56  
7.55  
7.55

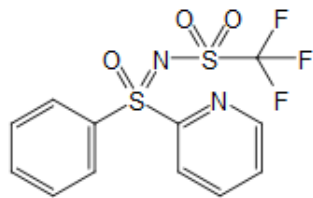

**3q**

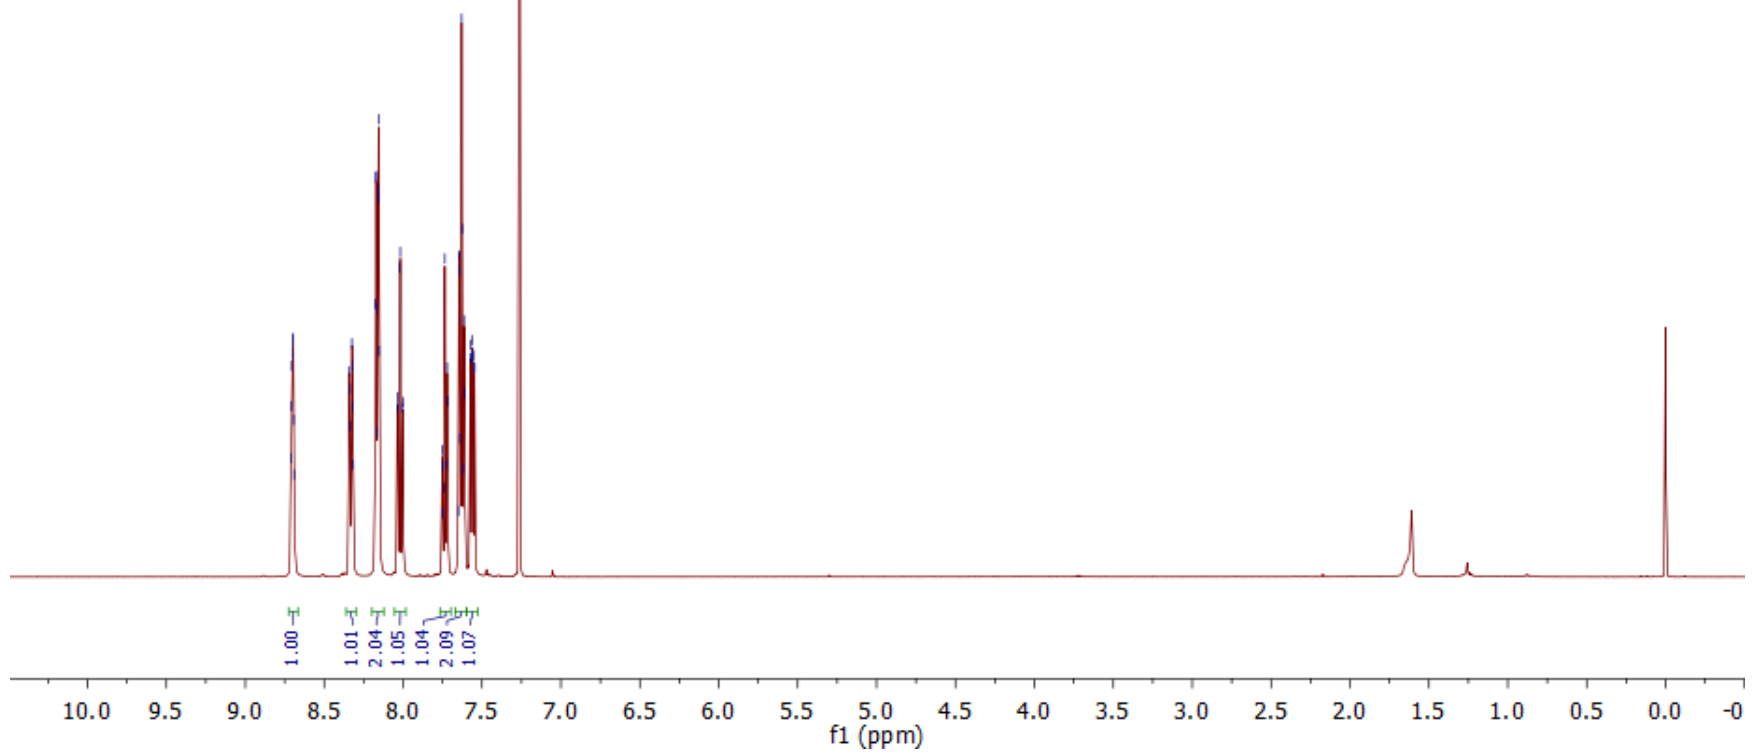

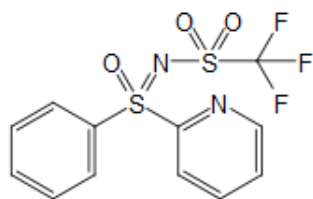

**3q**

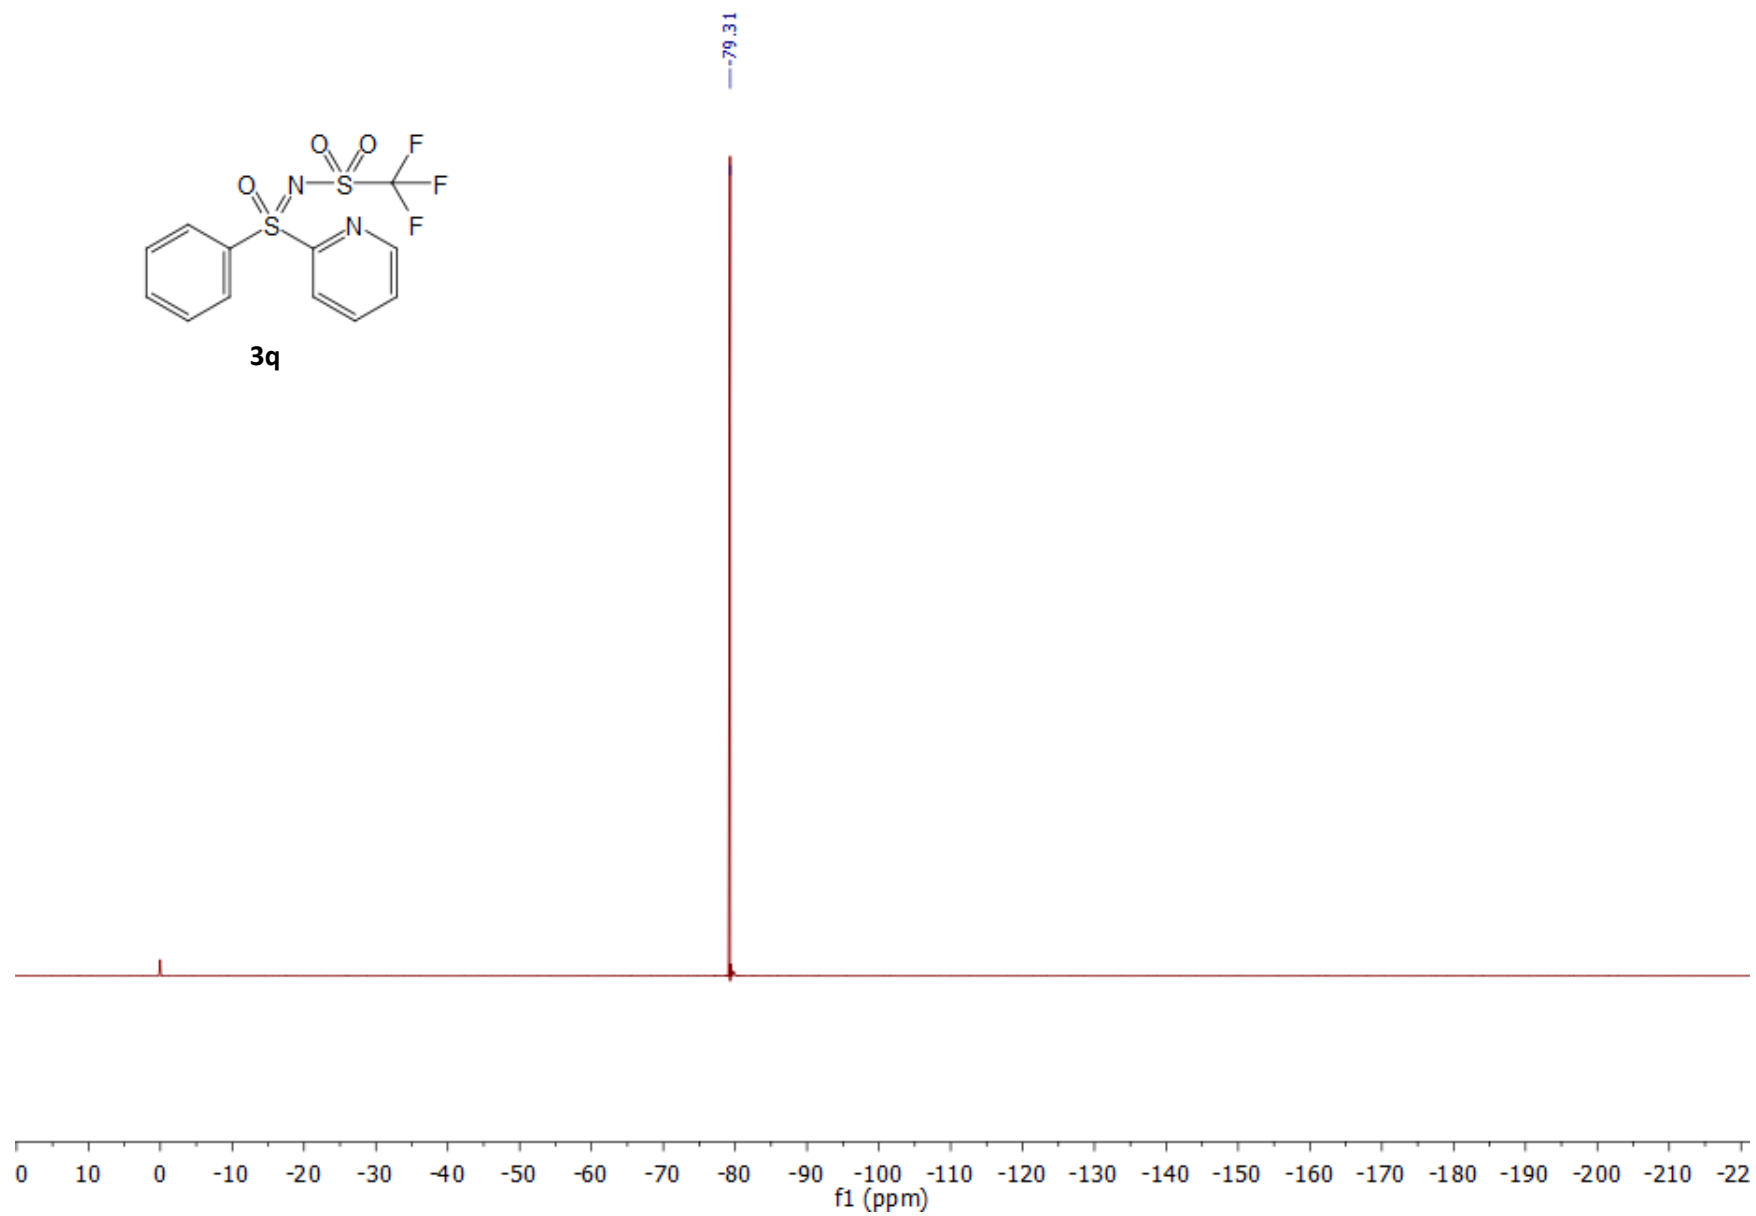



**3q**

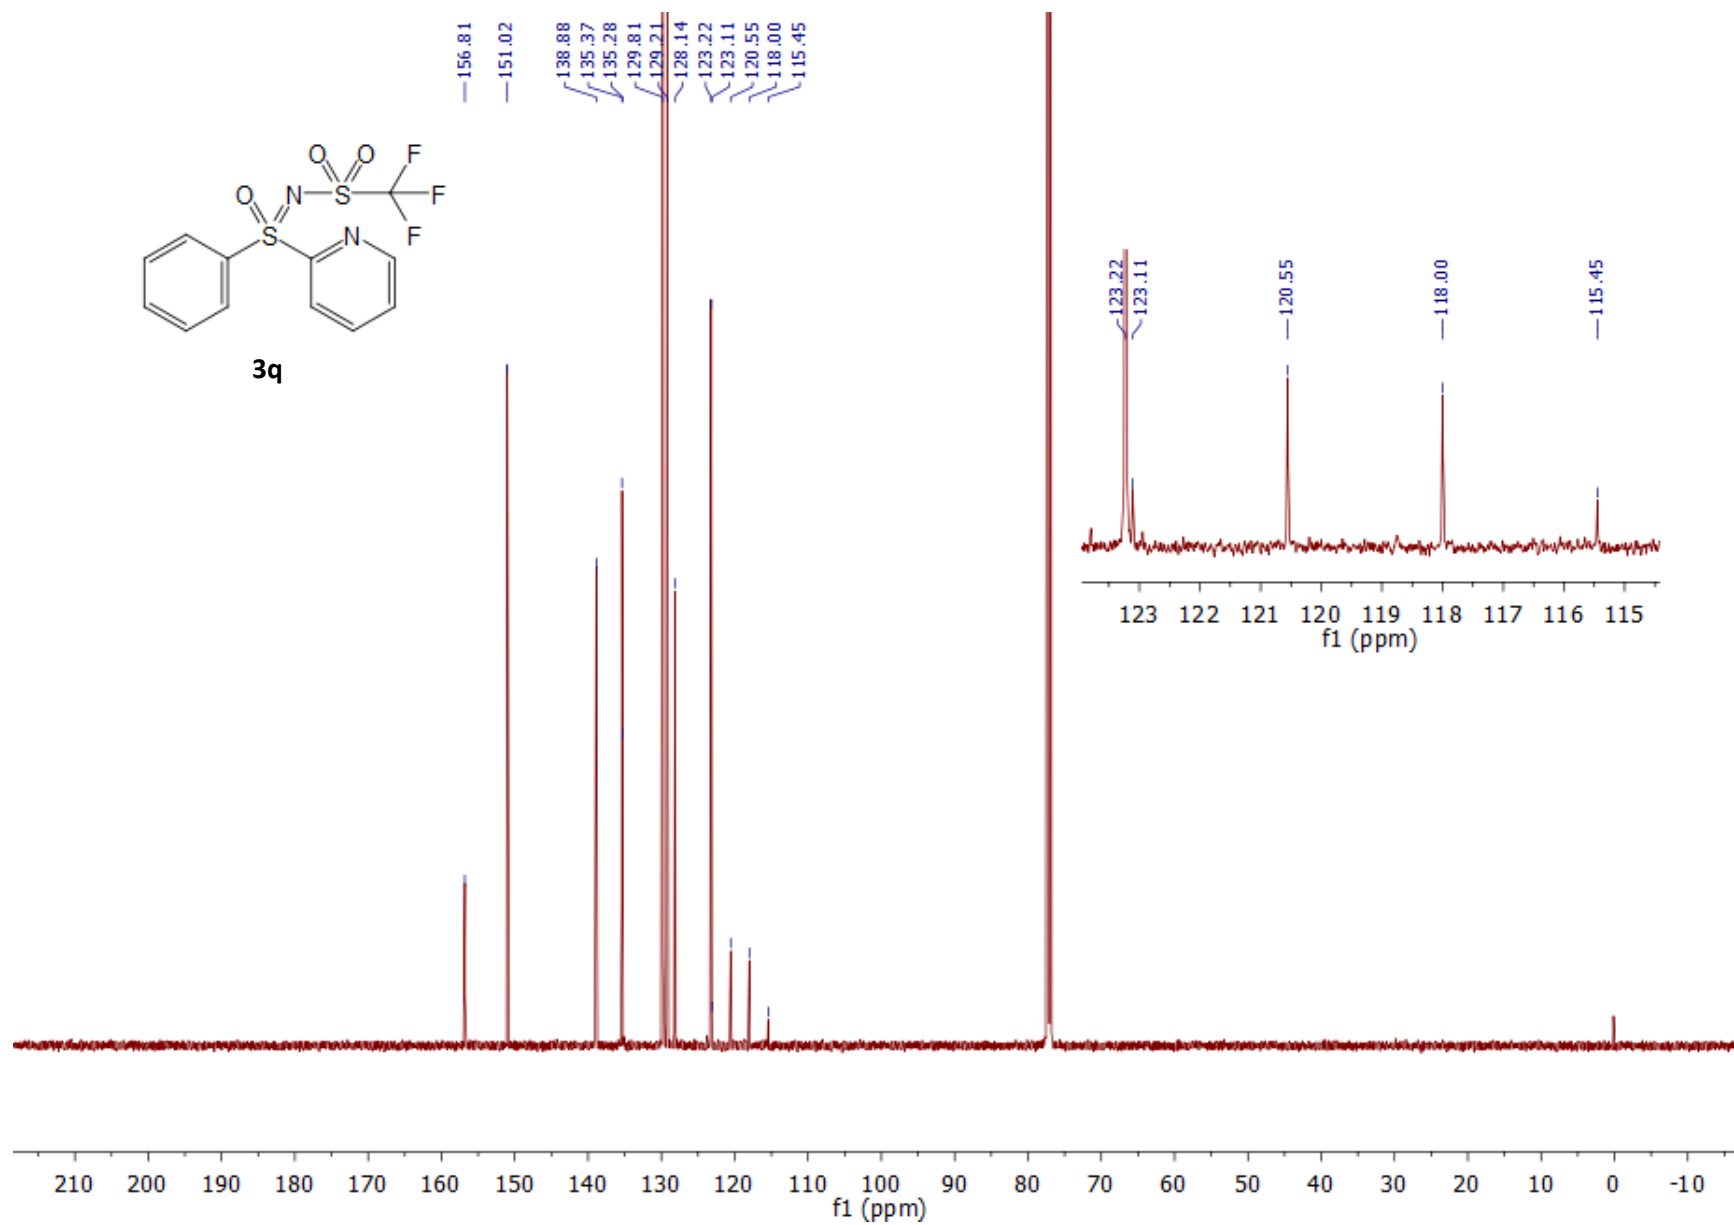



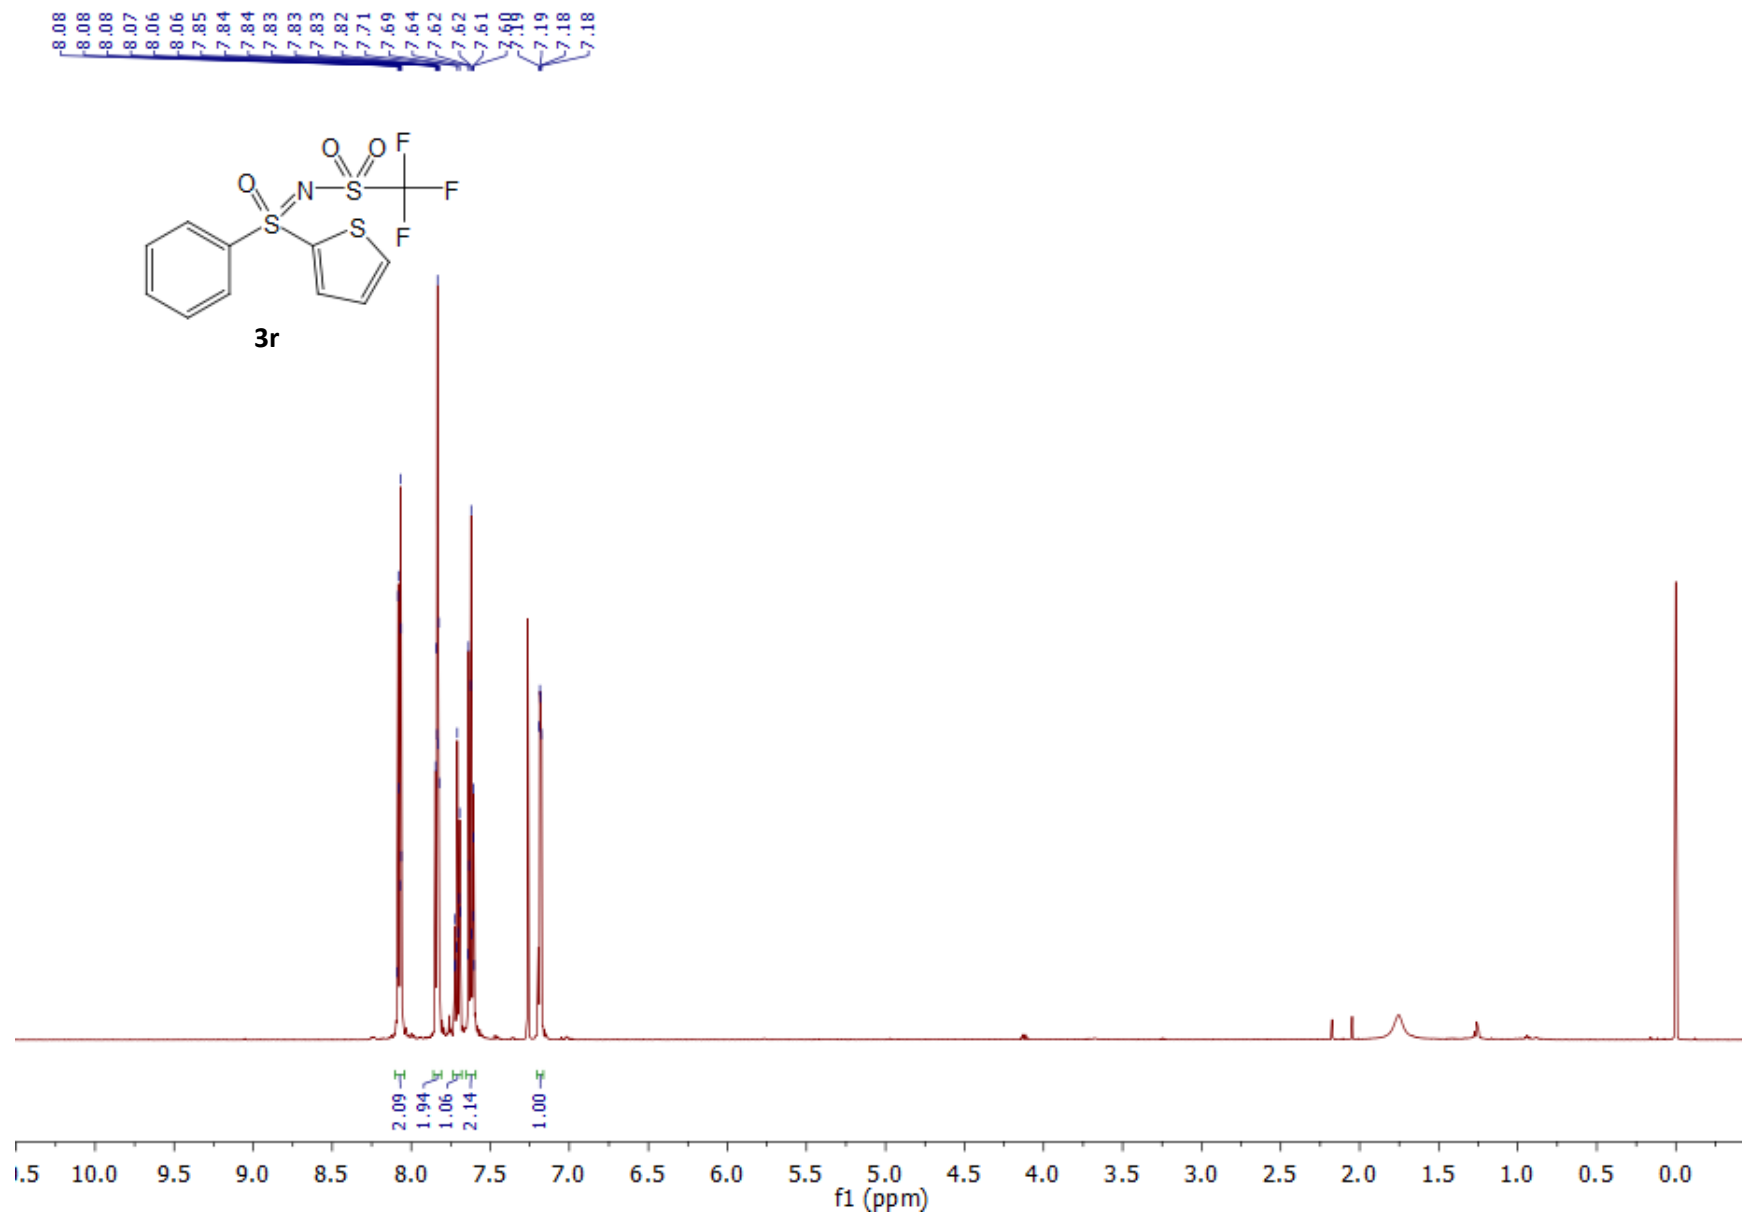

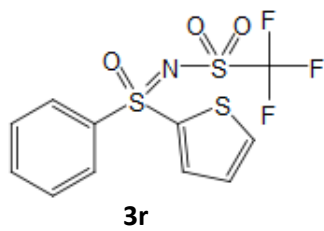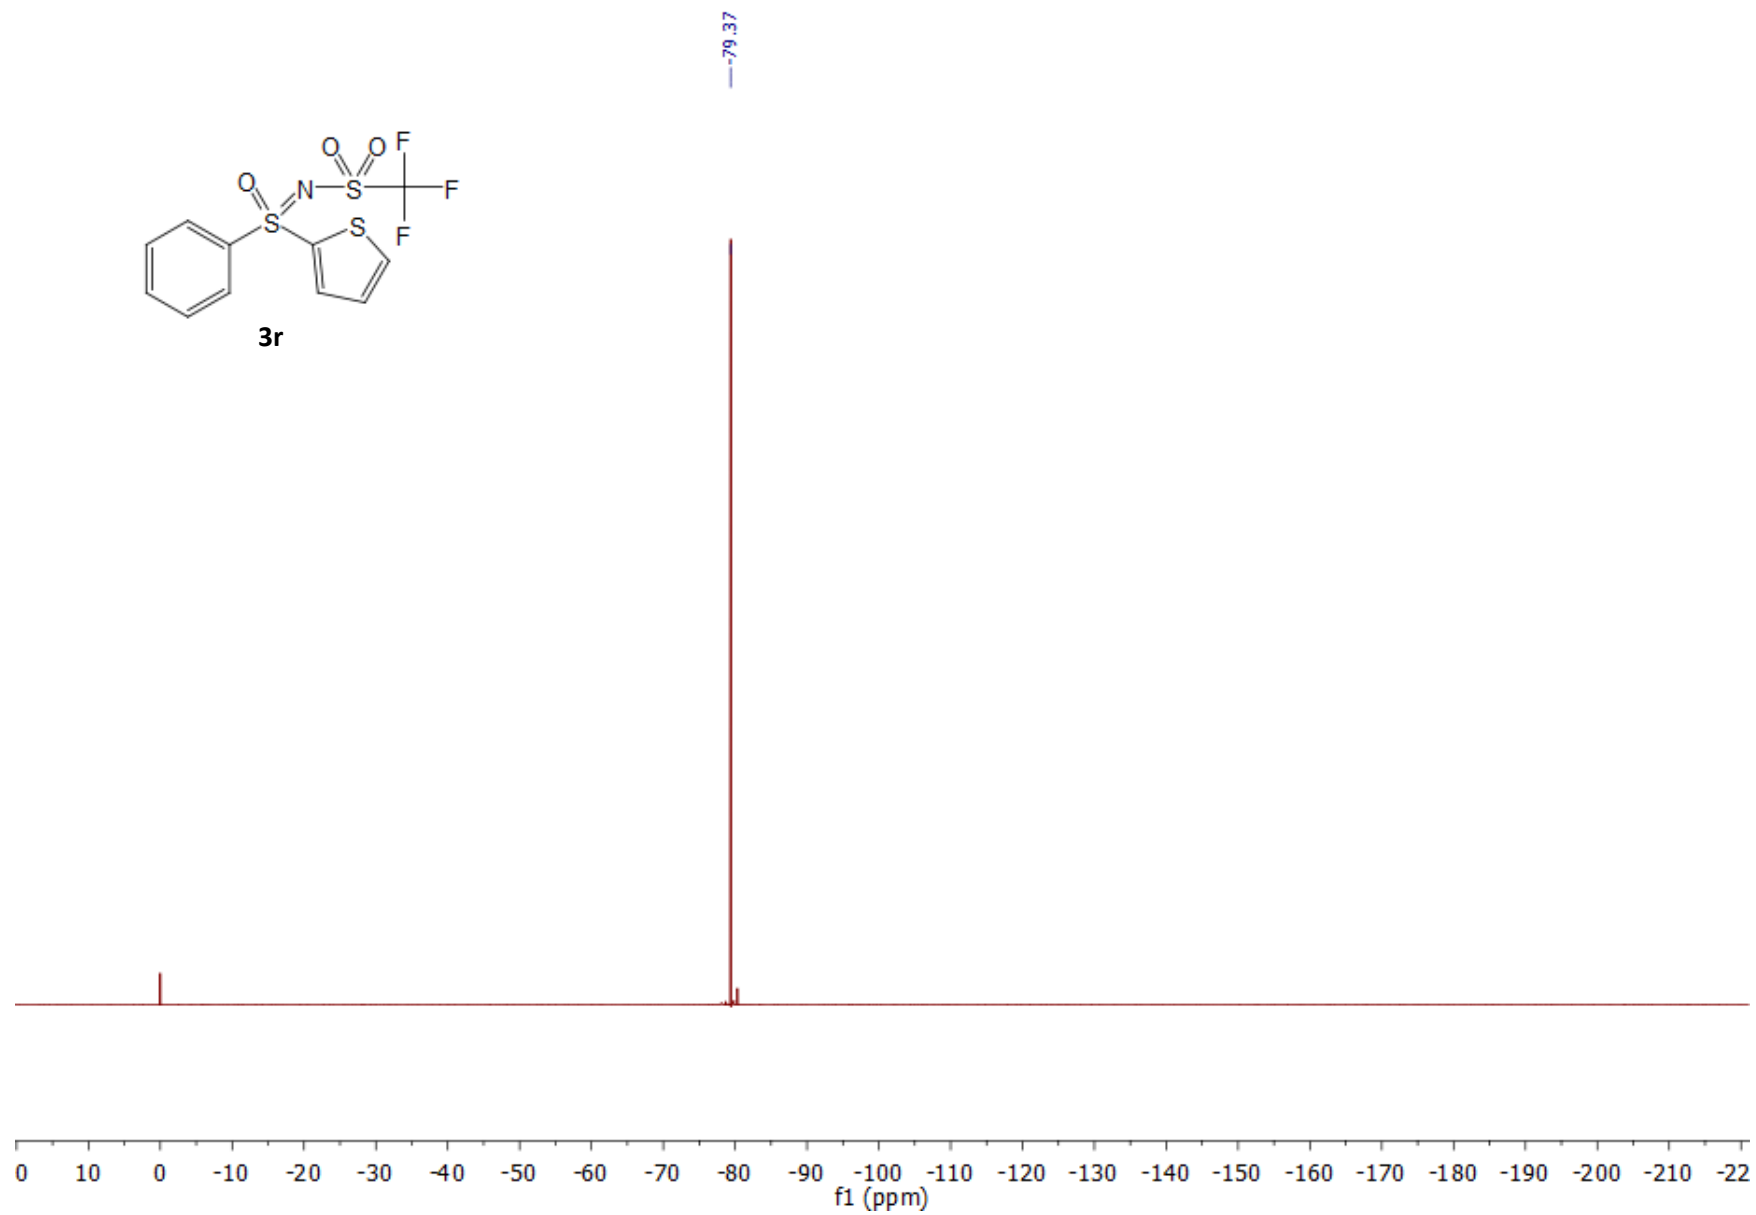

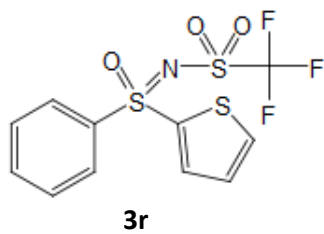

139.70  
138.96  
136.80  
135.32  
134.84  
130.00  
128.81  
127.20  
122.92  
120.37  
117.82  
115.26

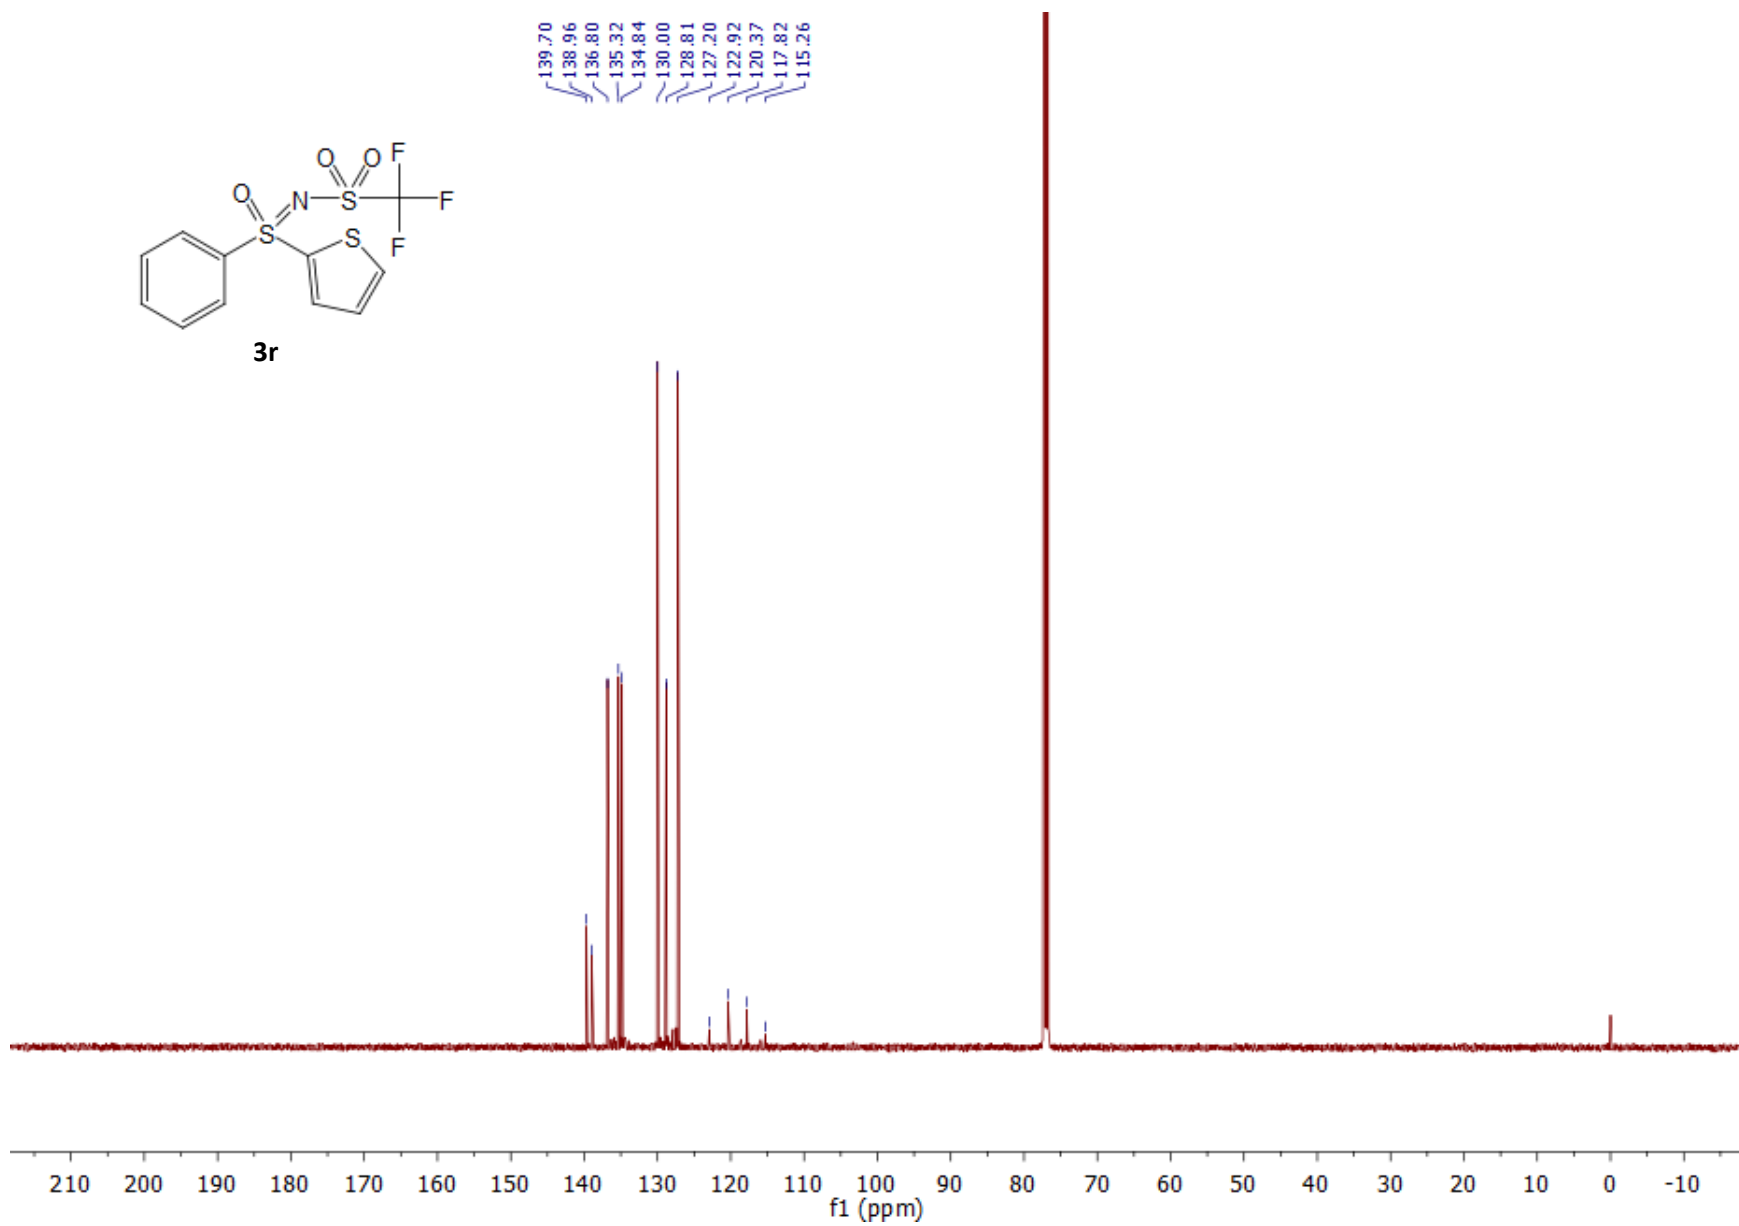

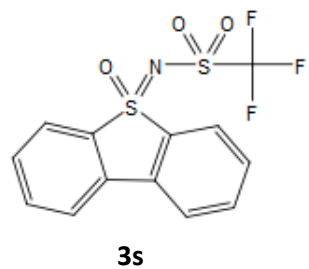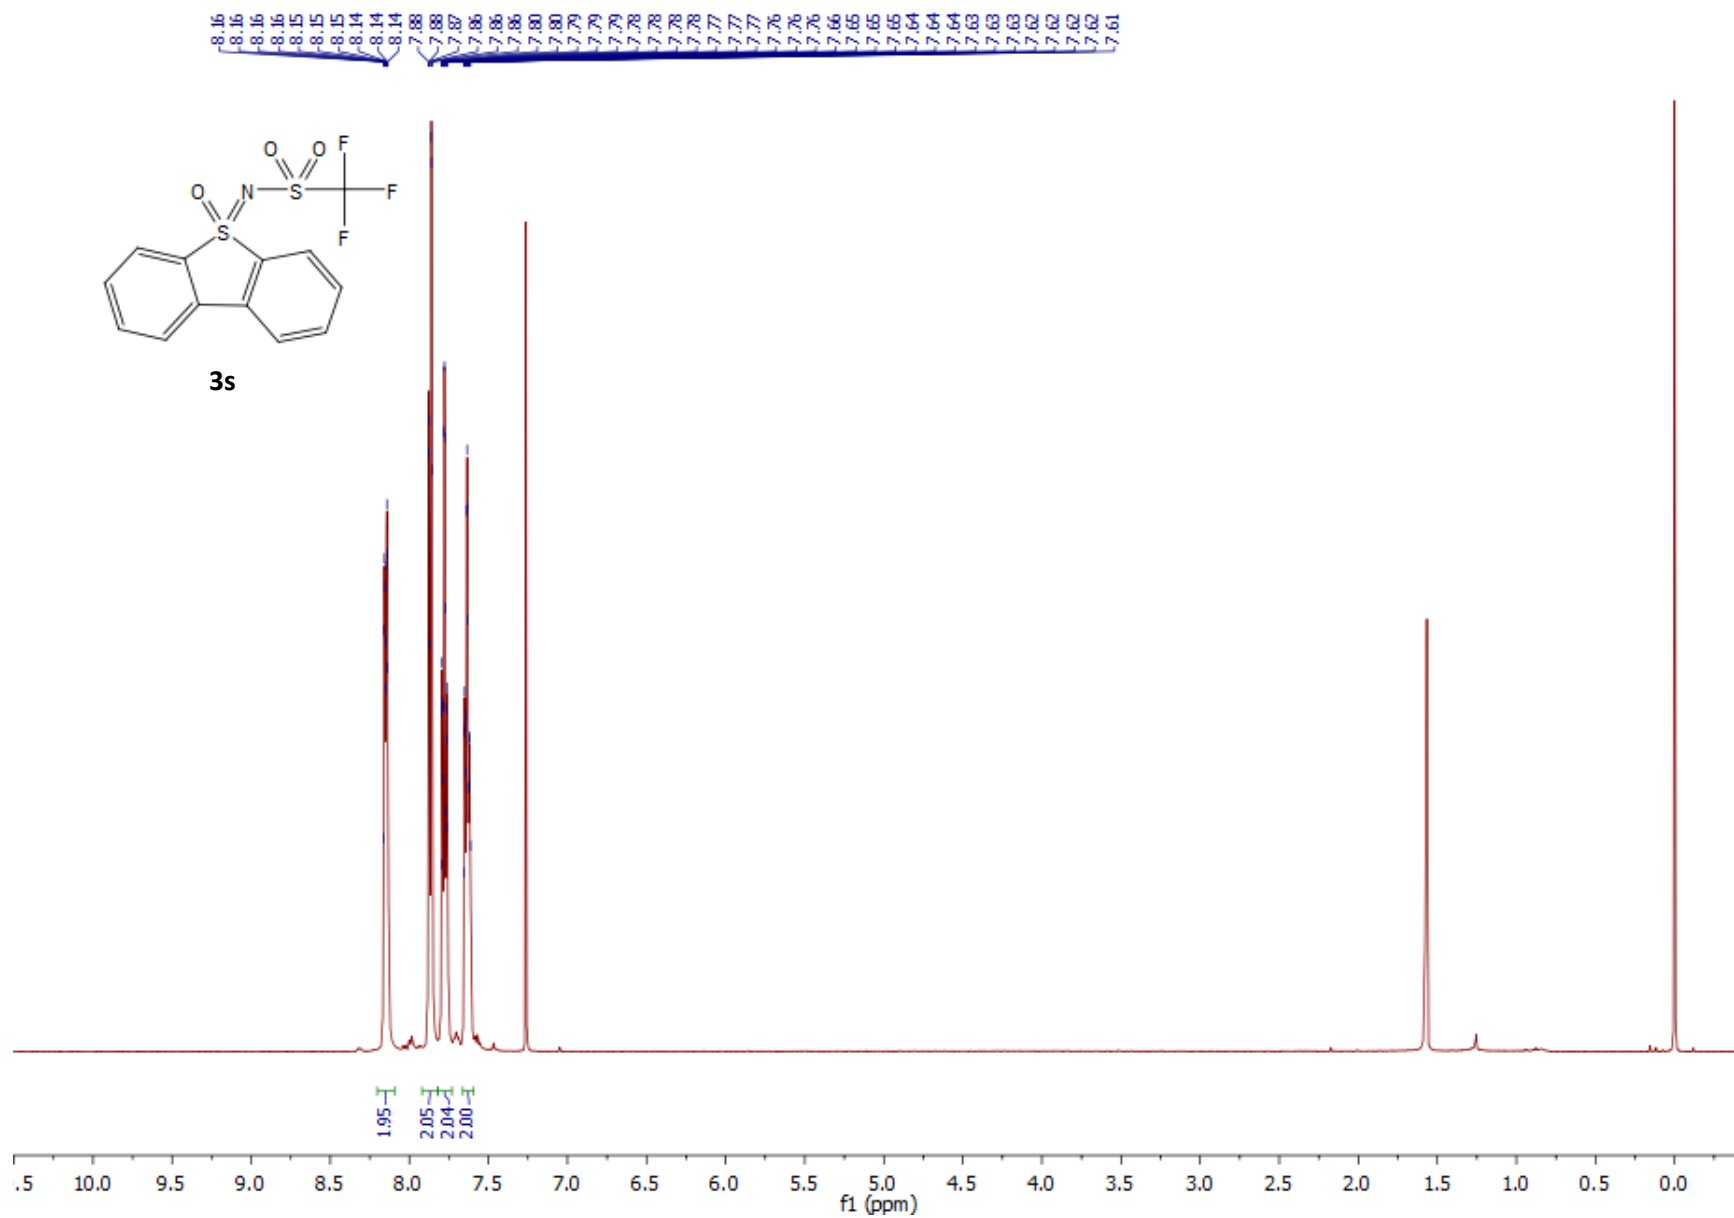

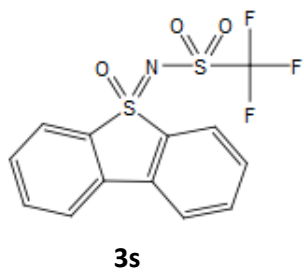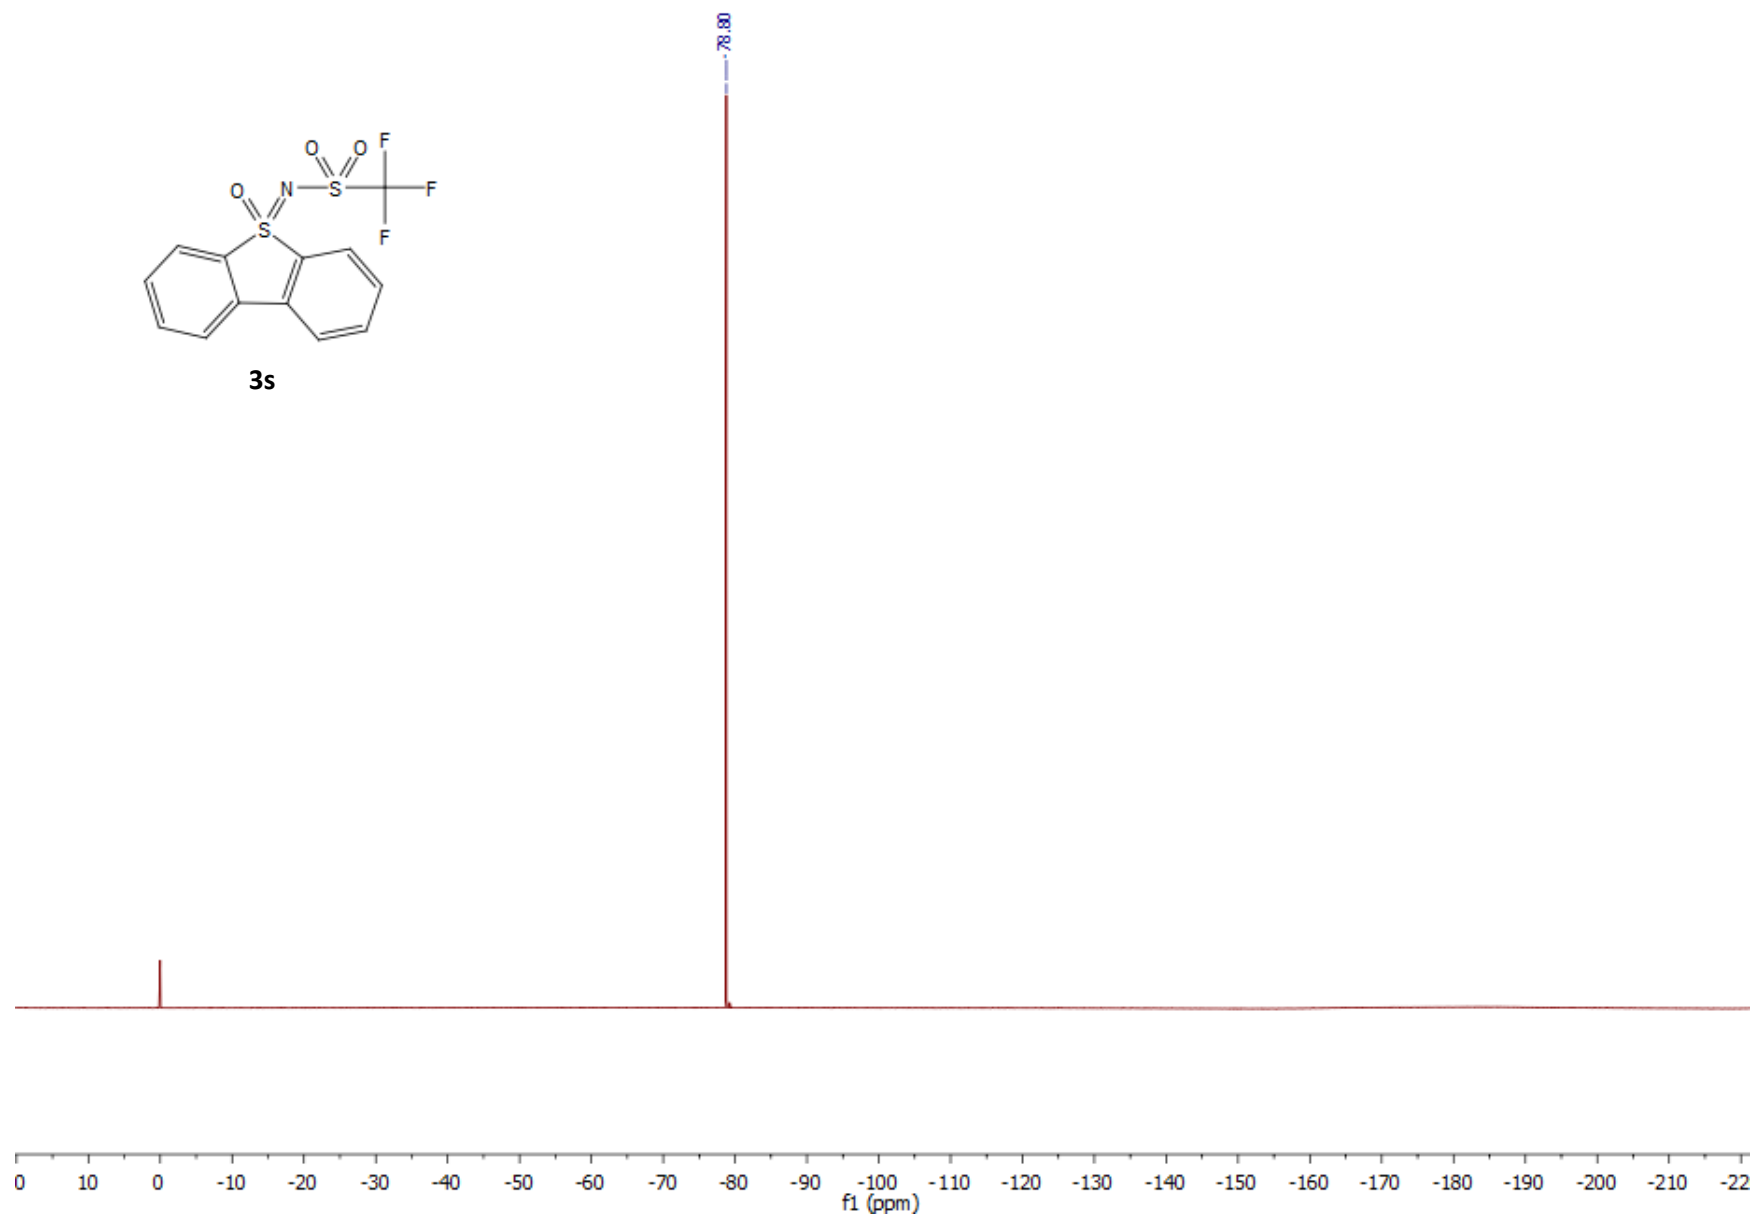

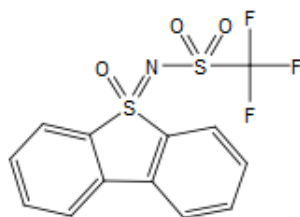

**3s**

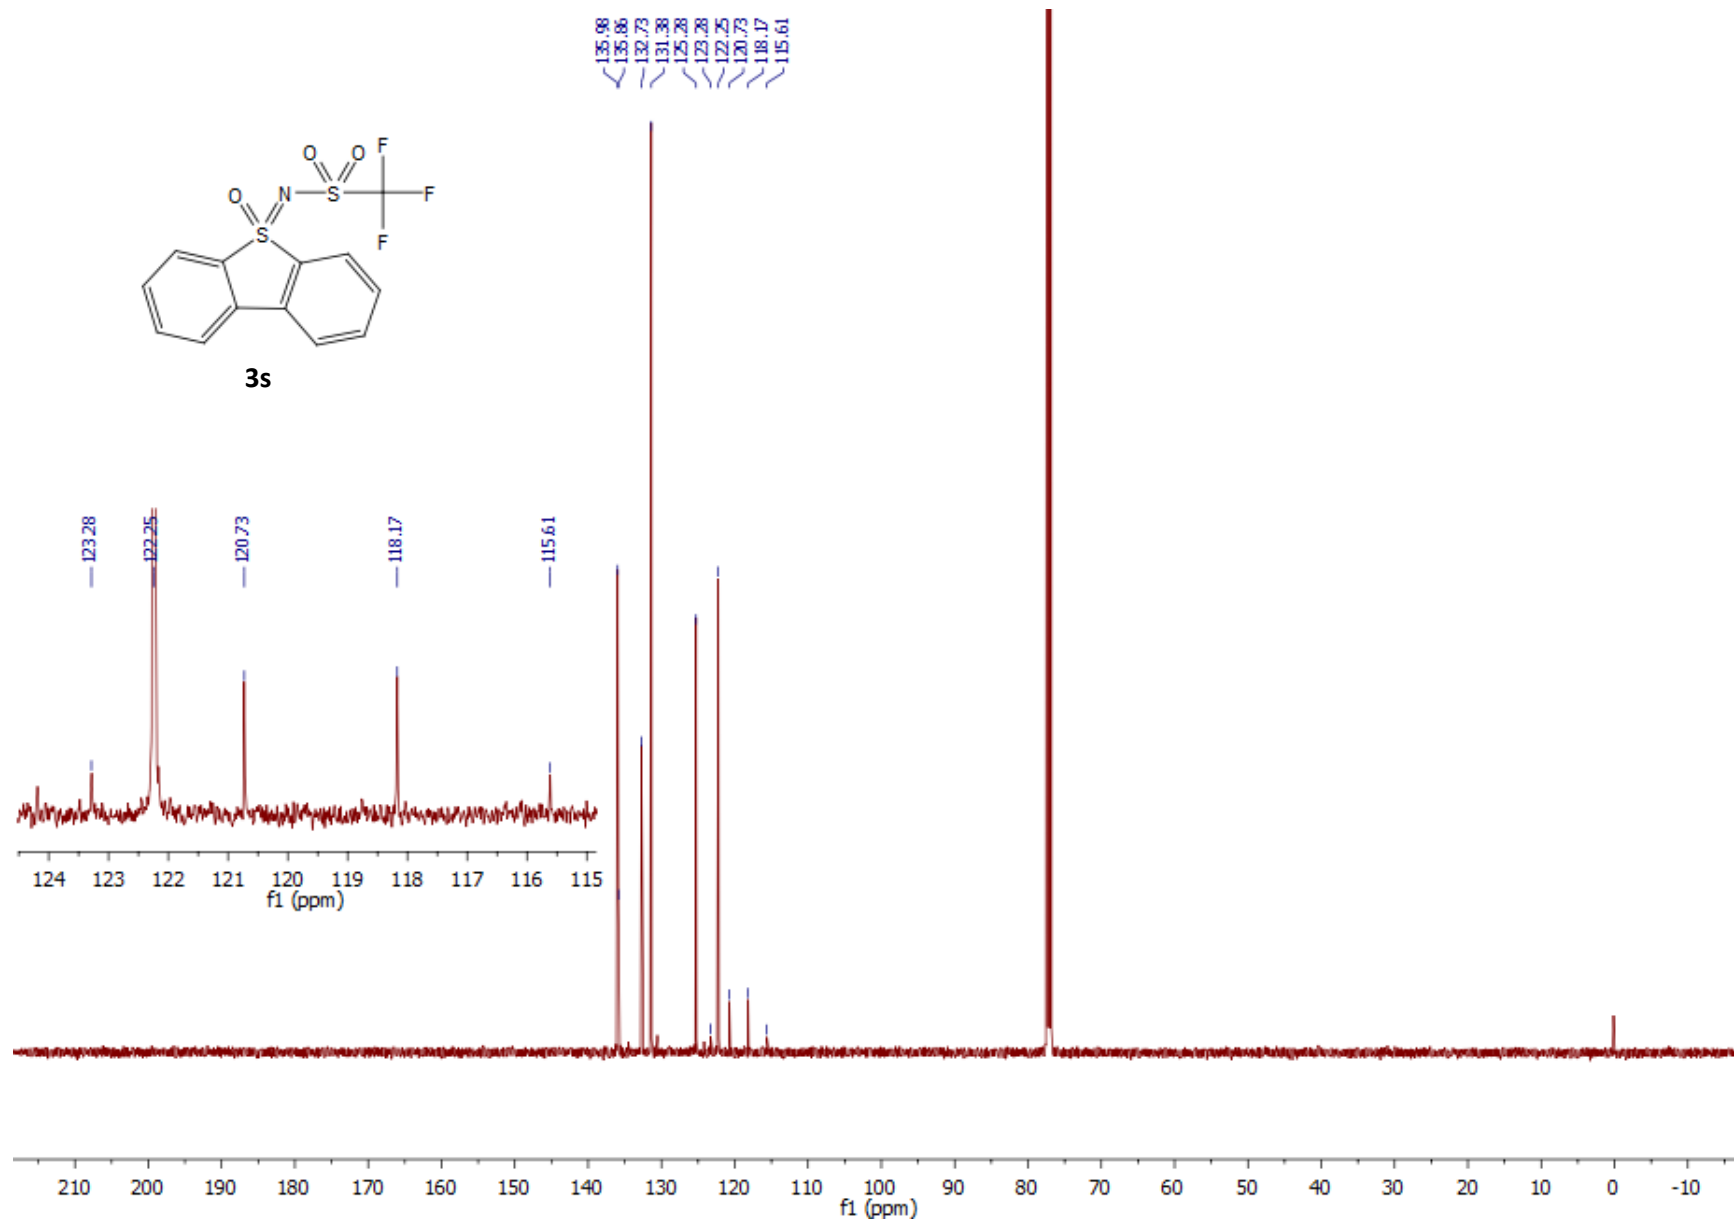

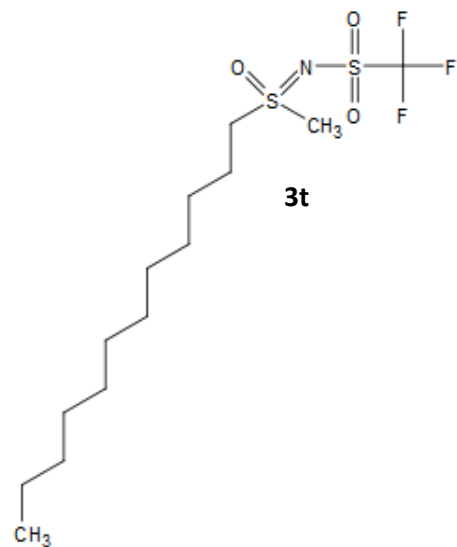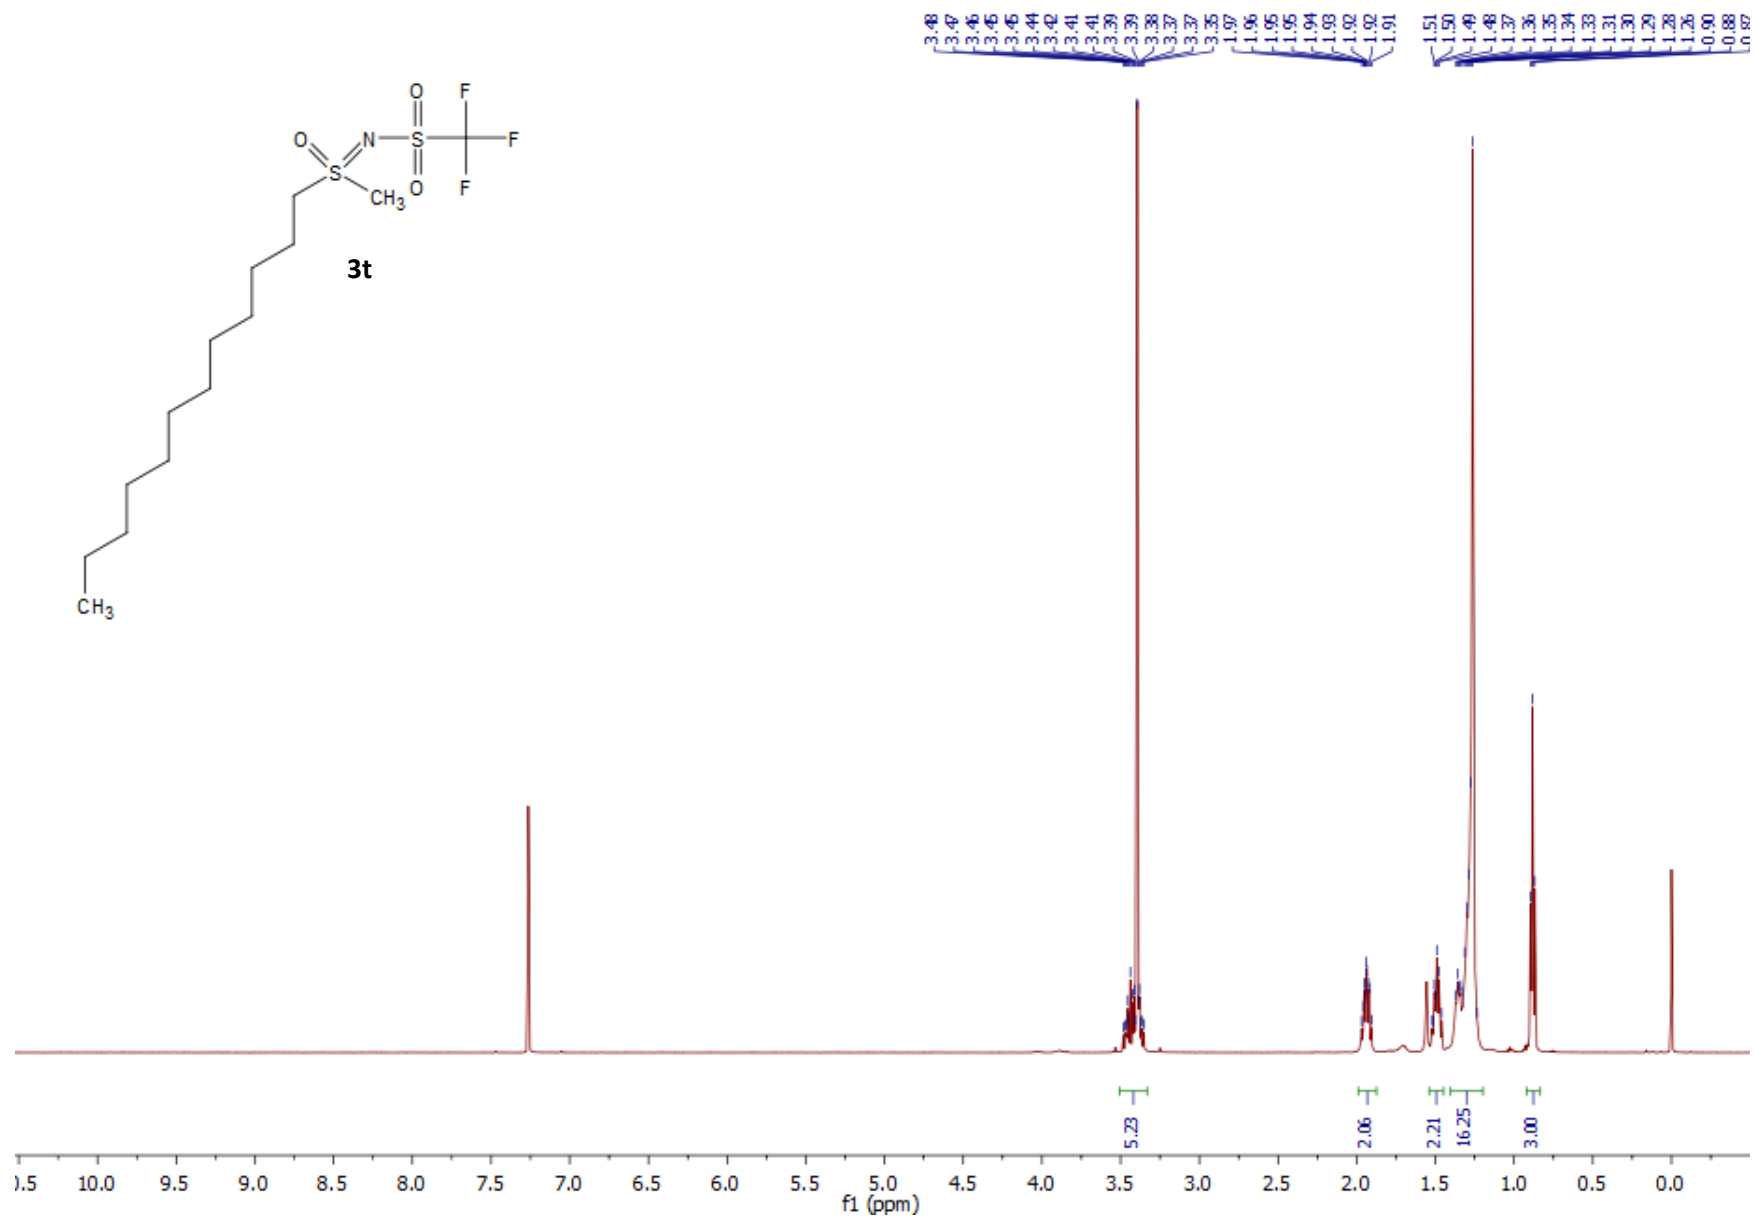

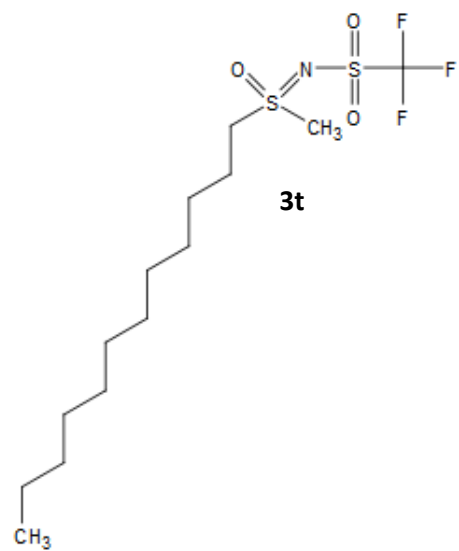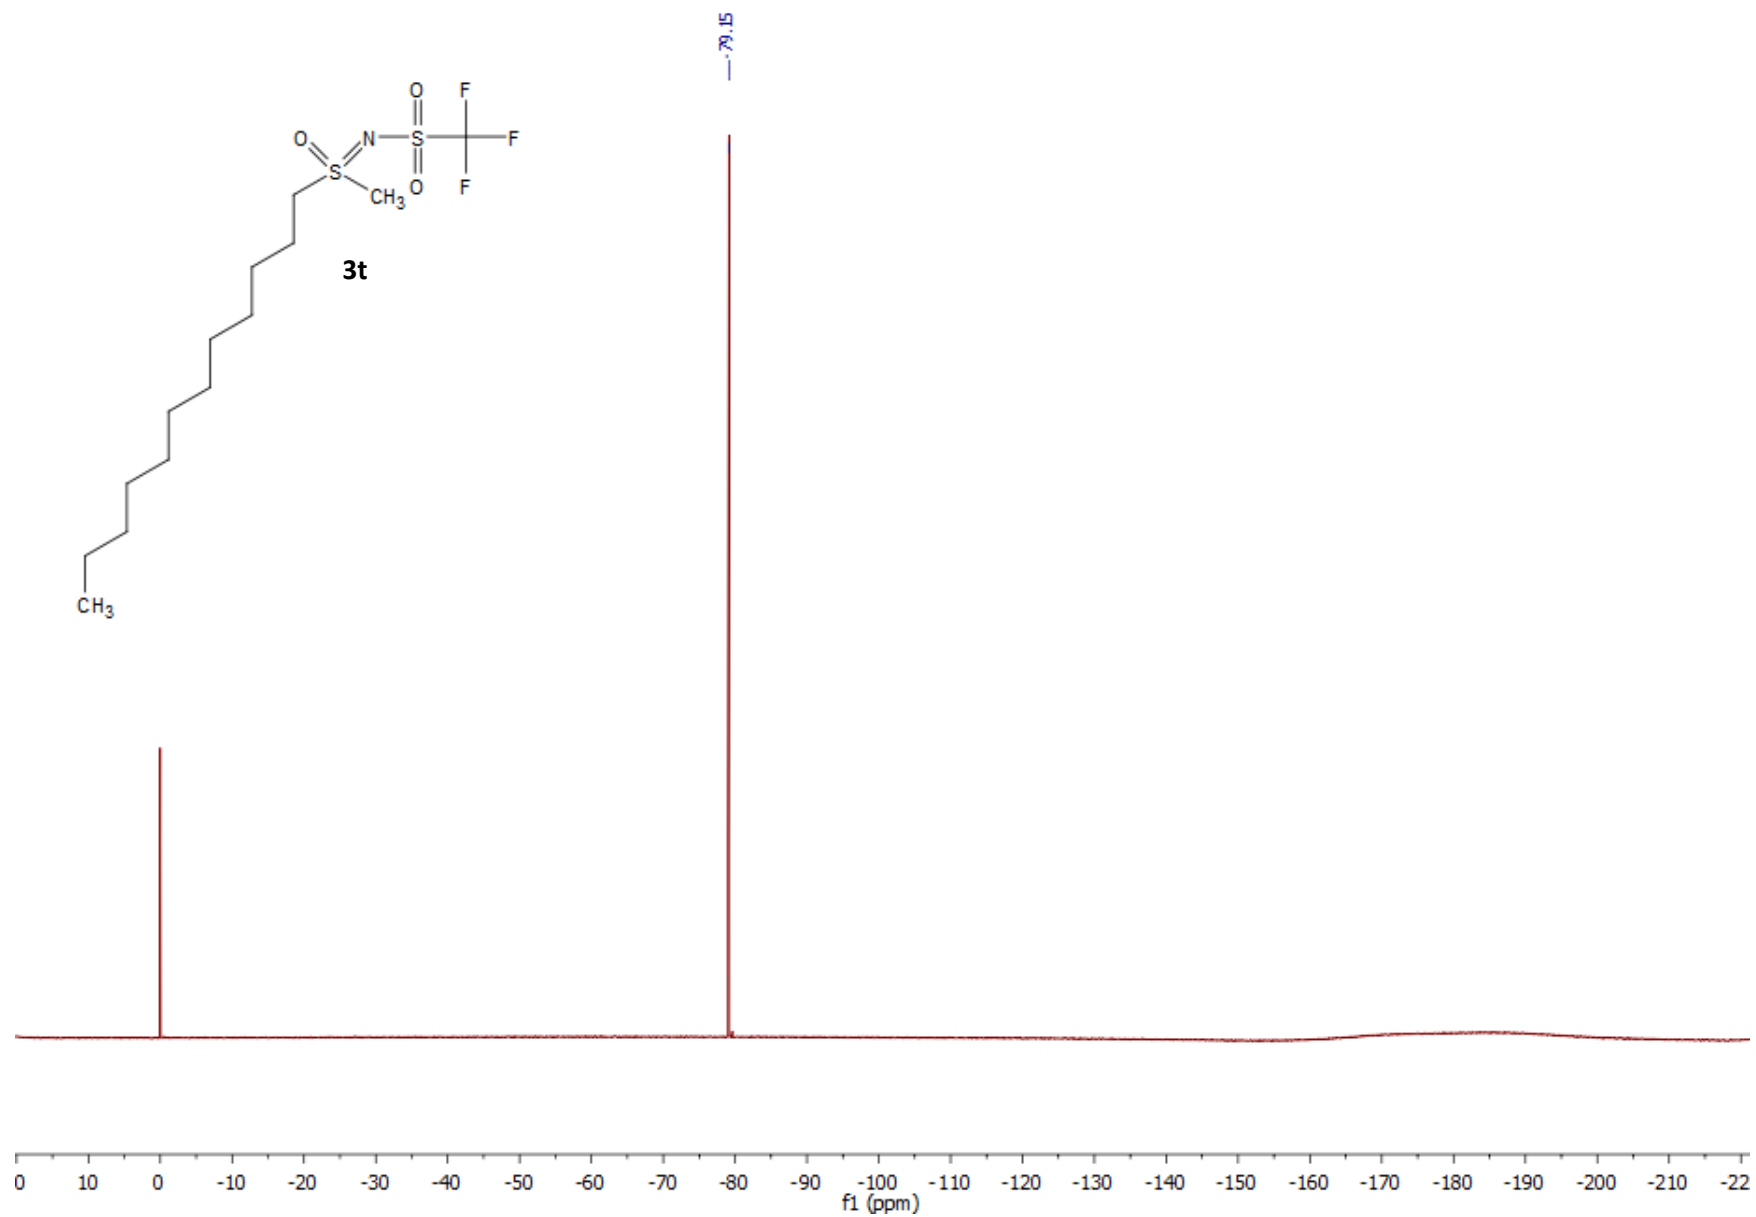



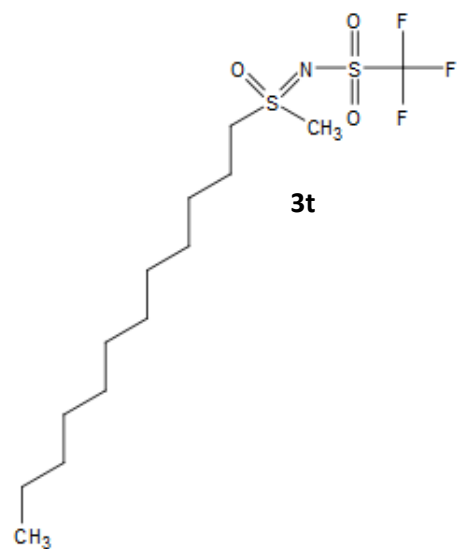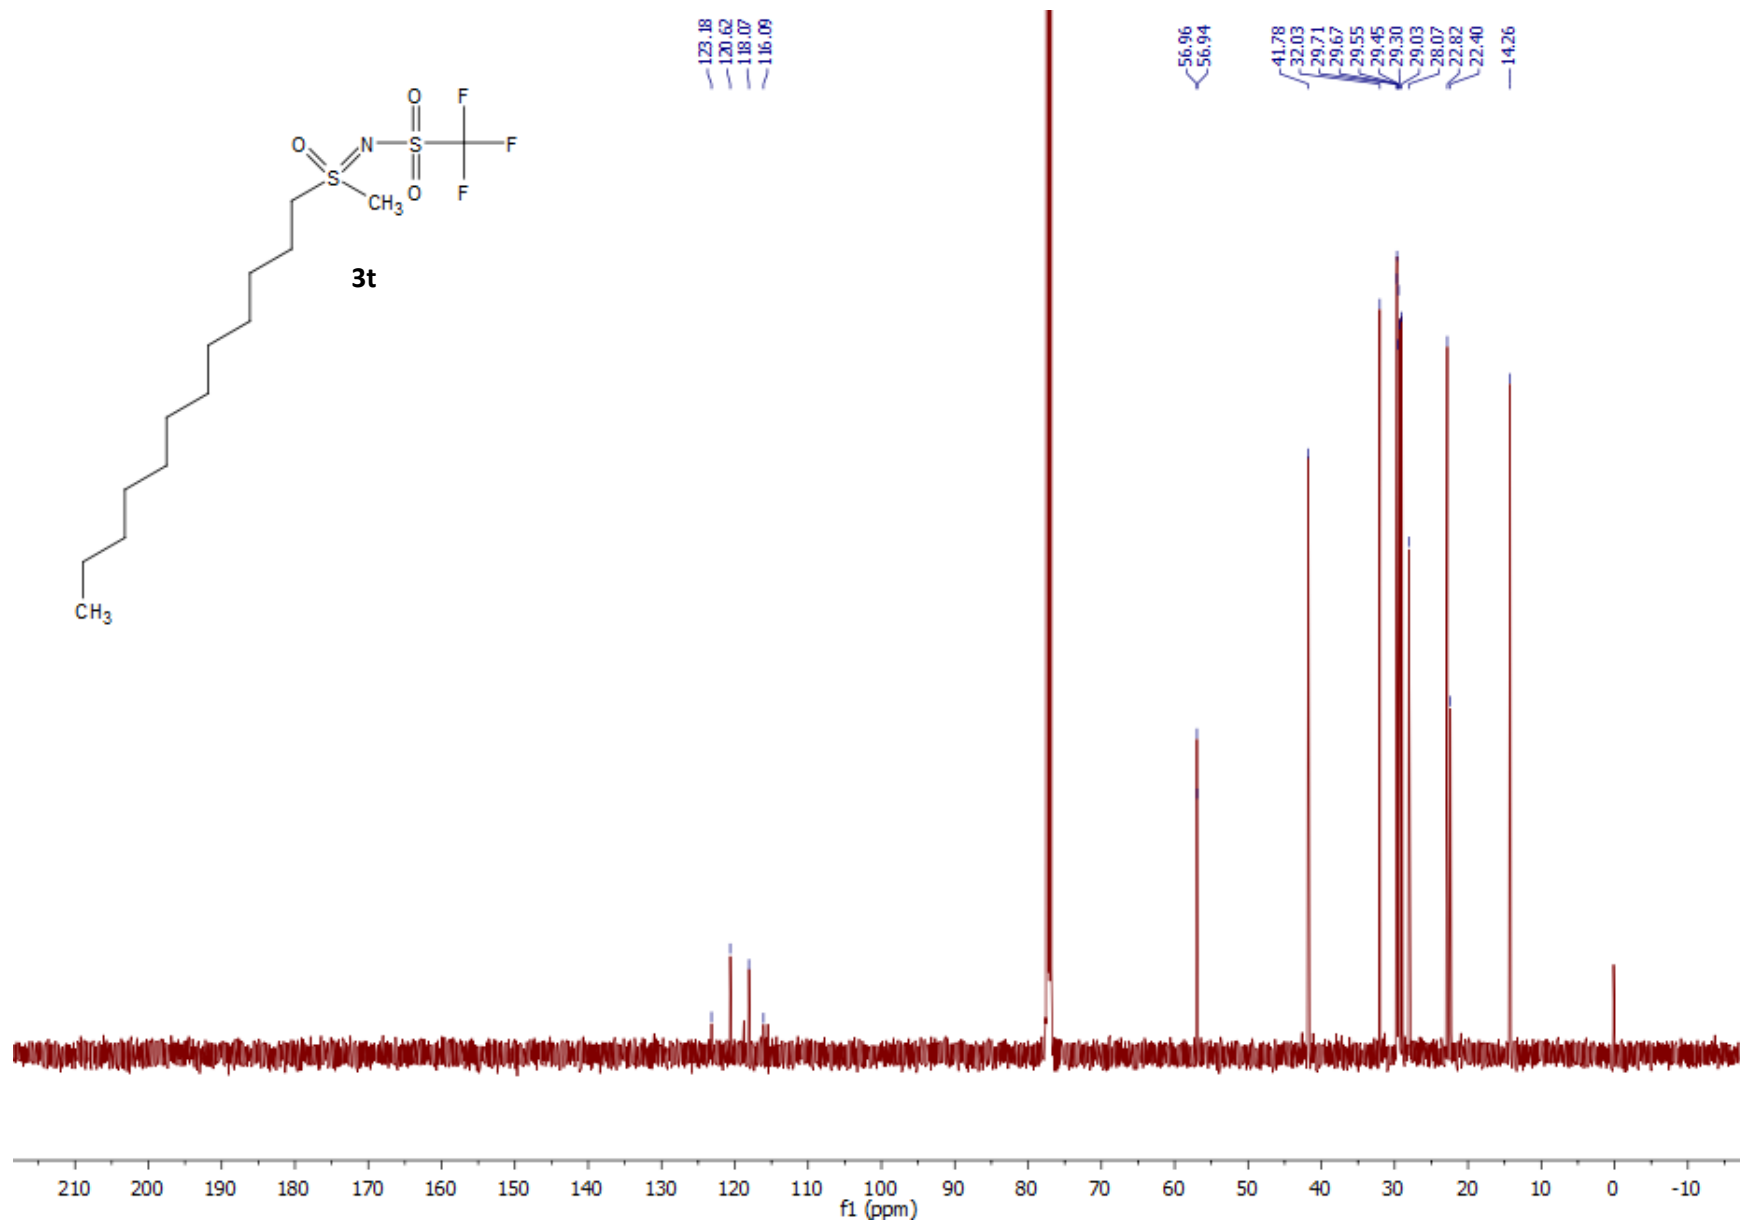

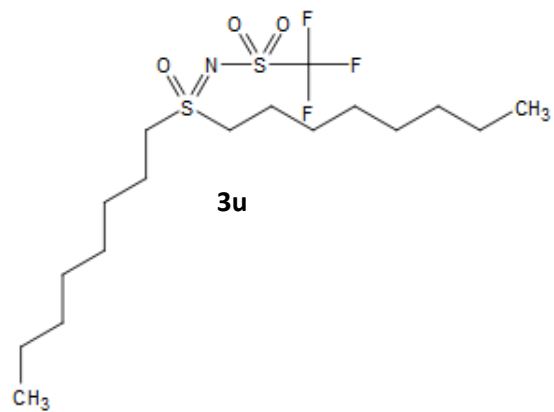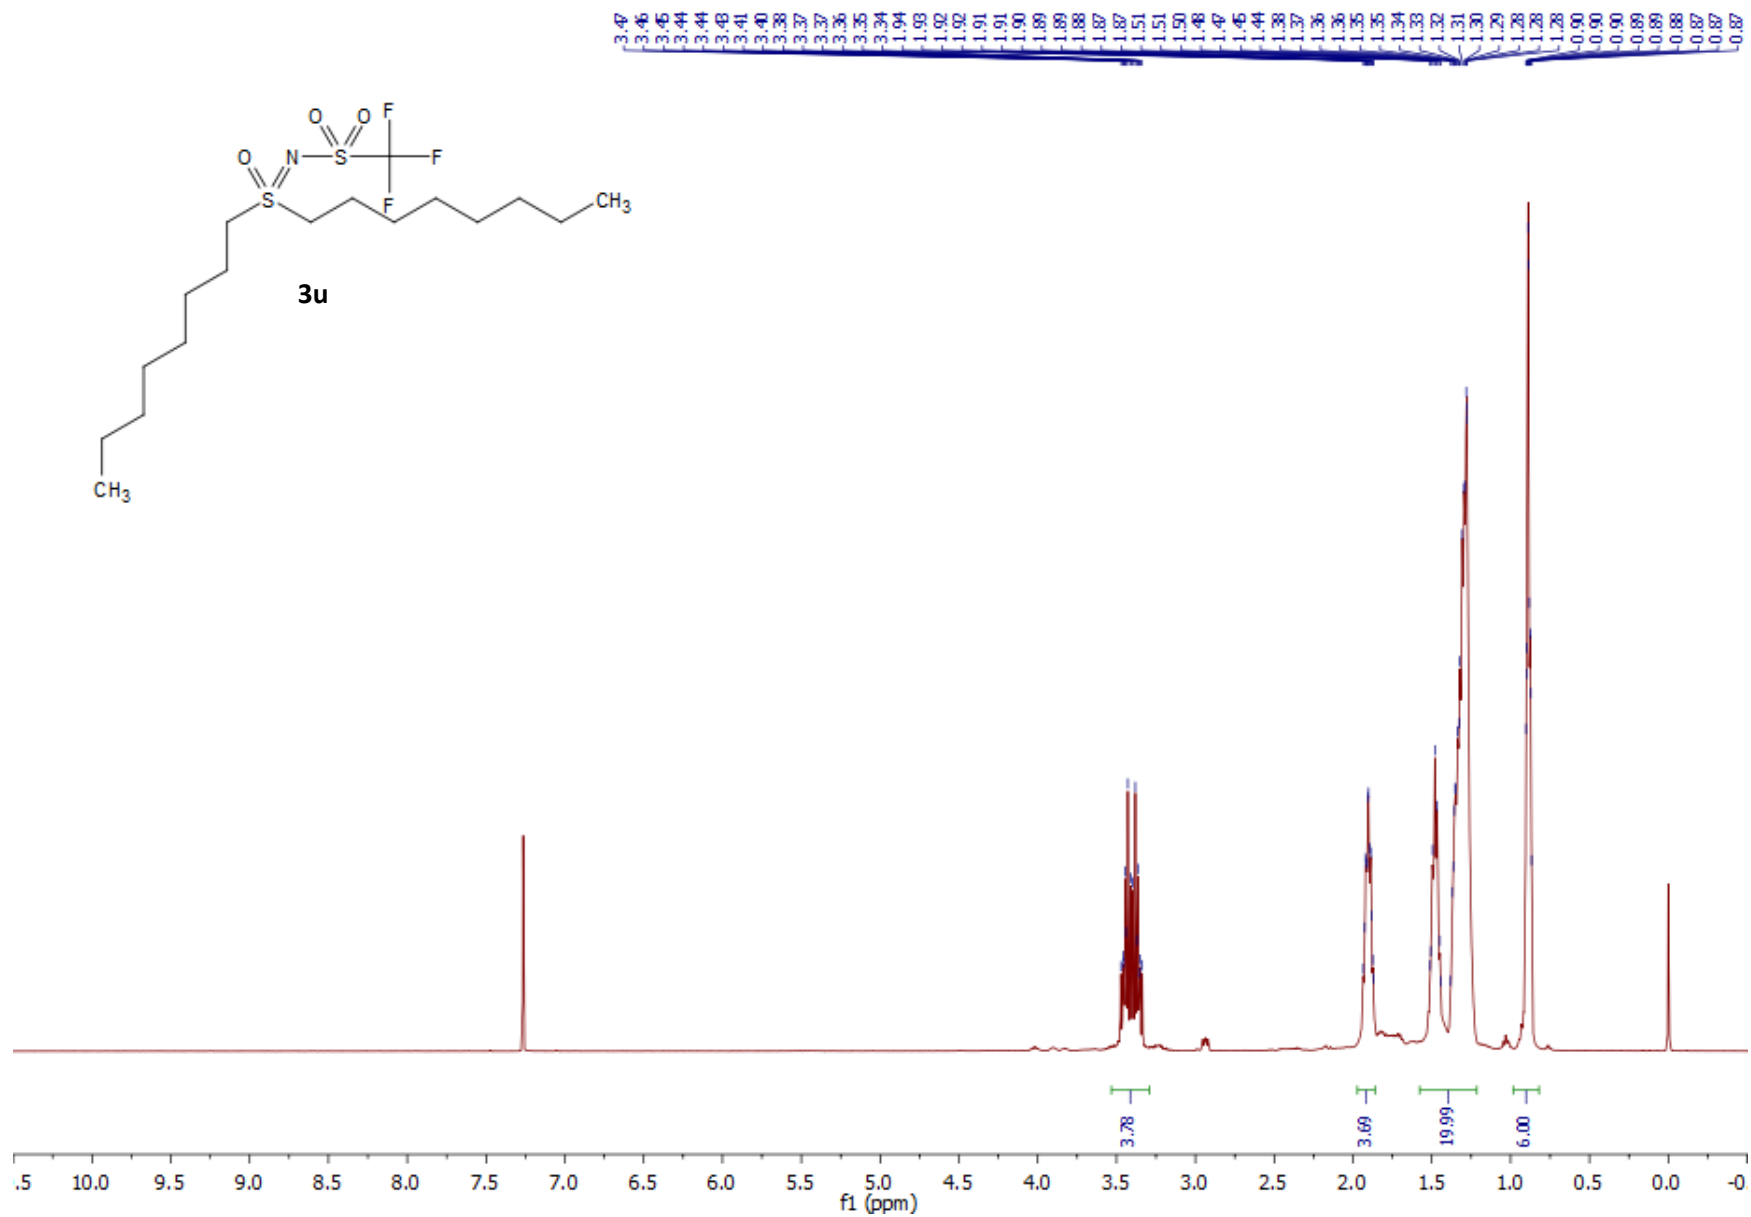

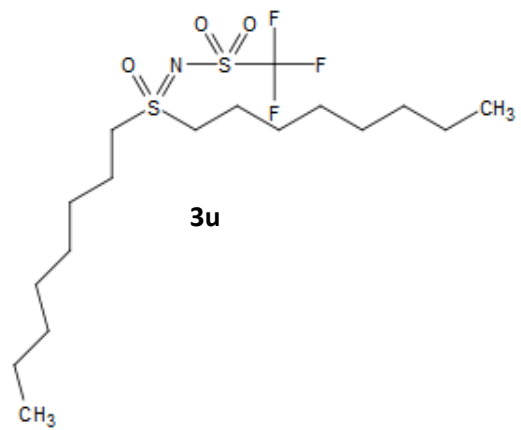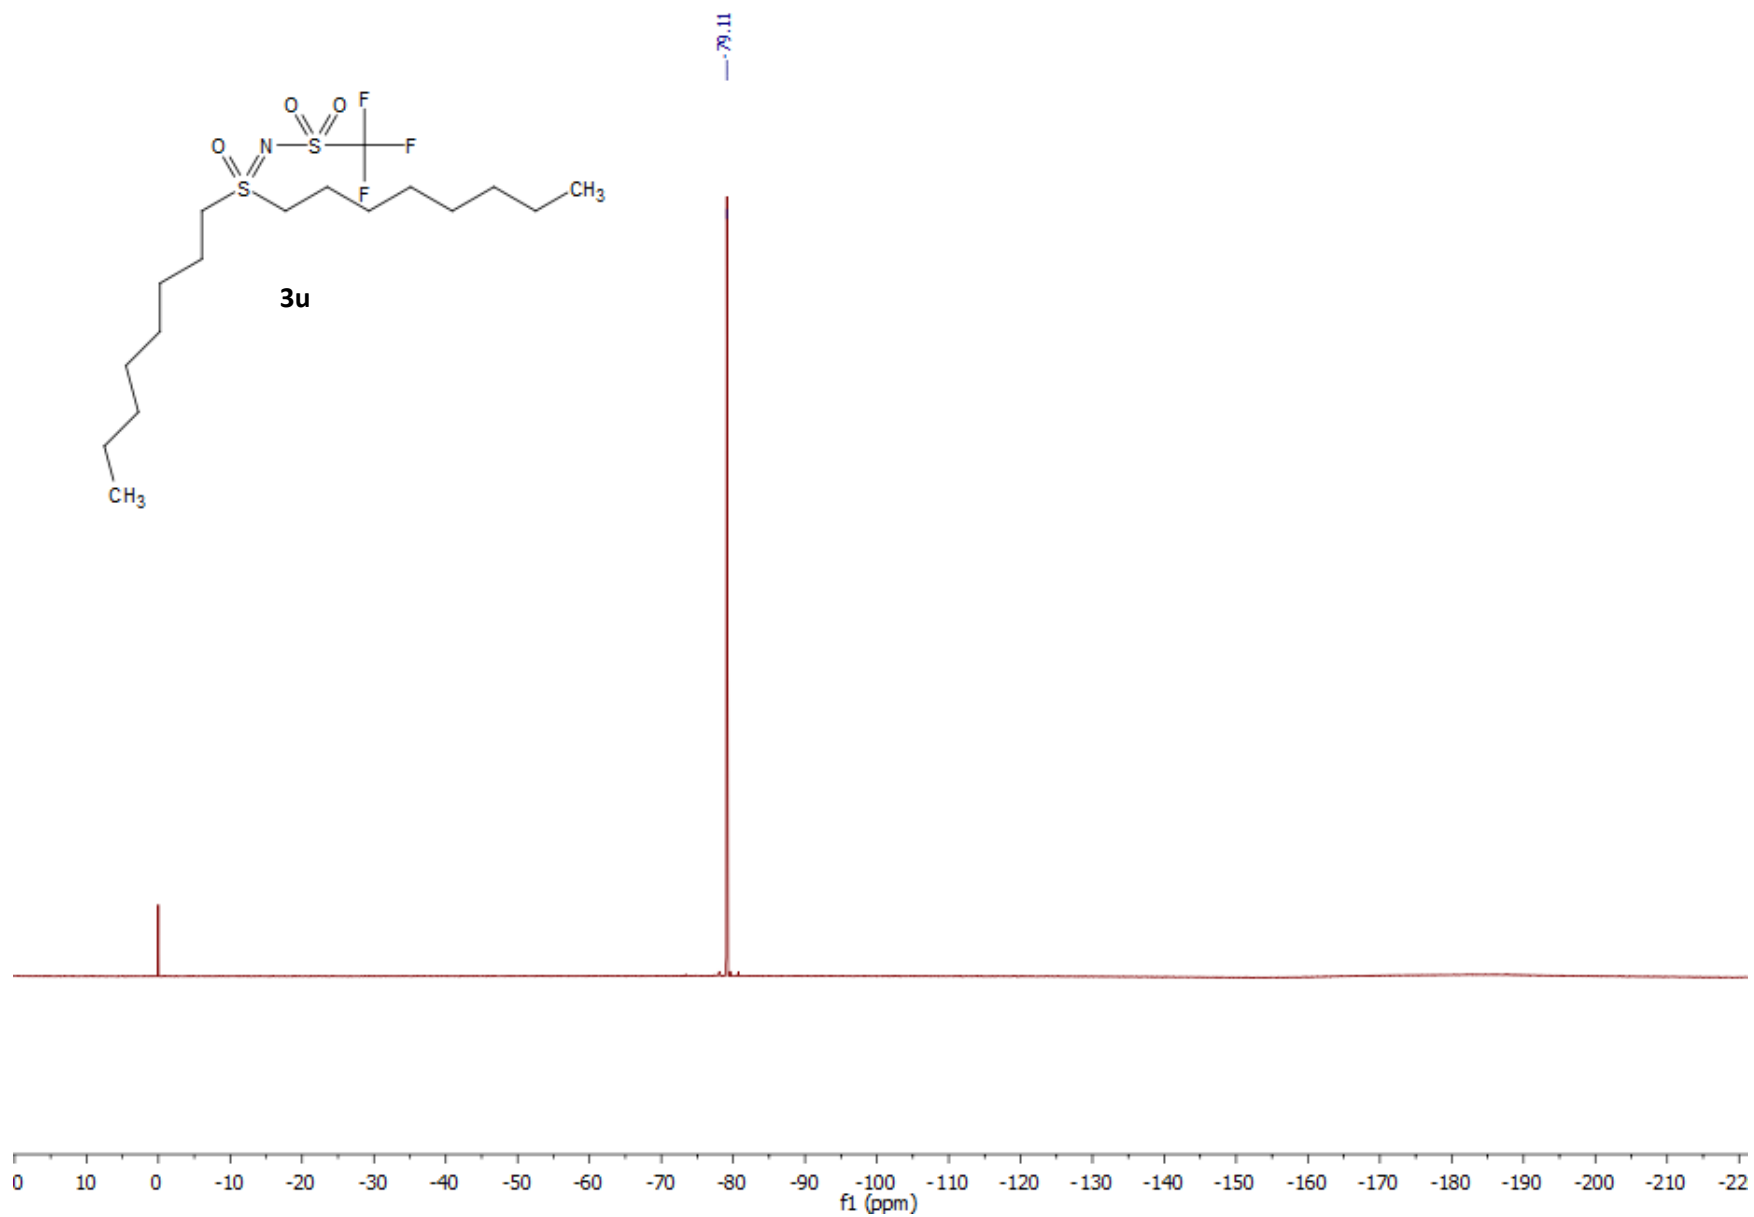

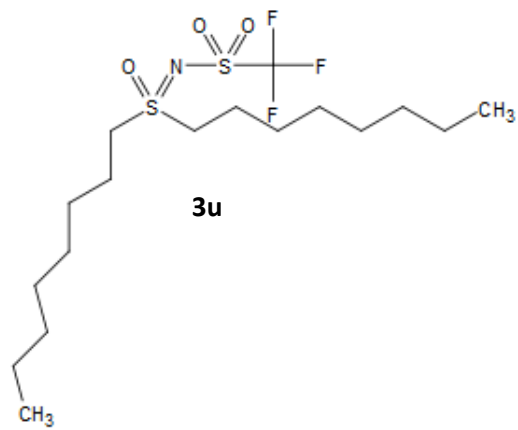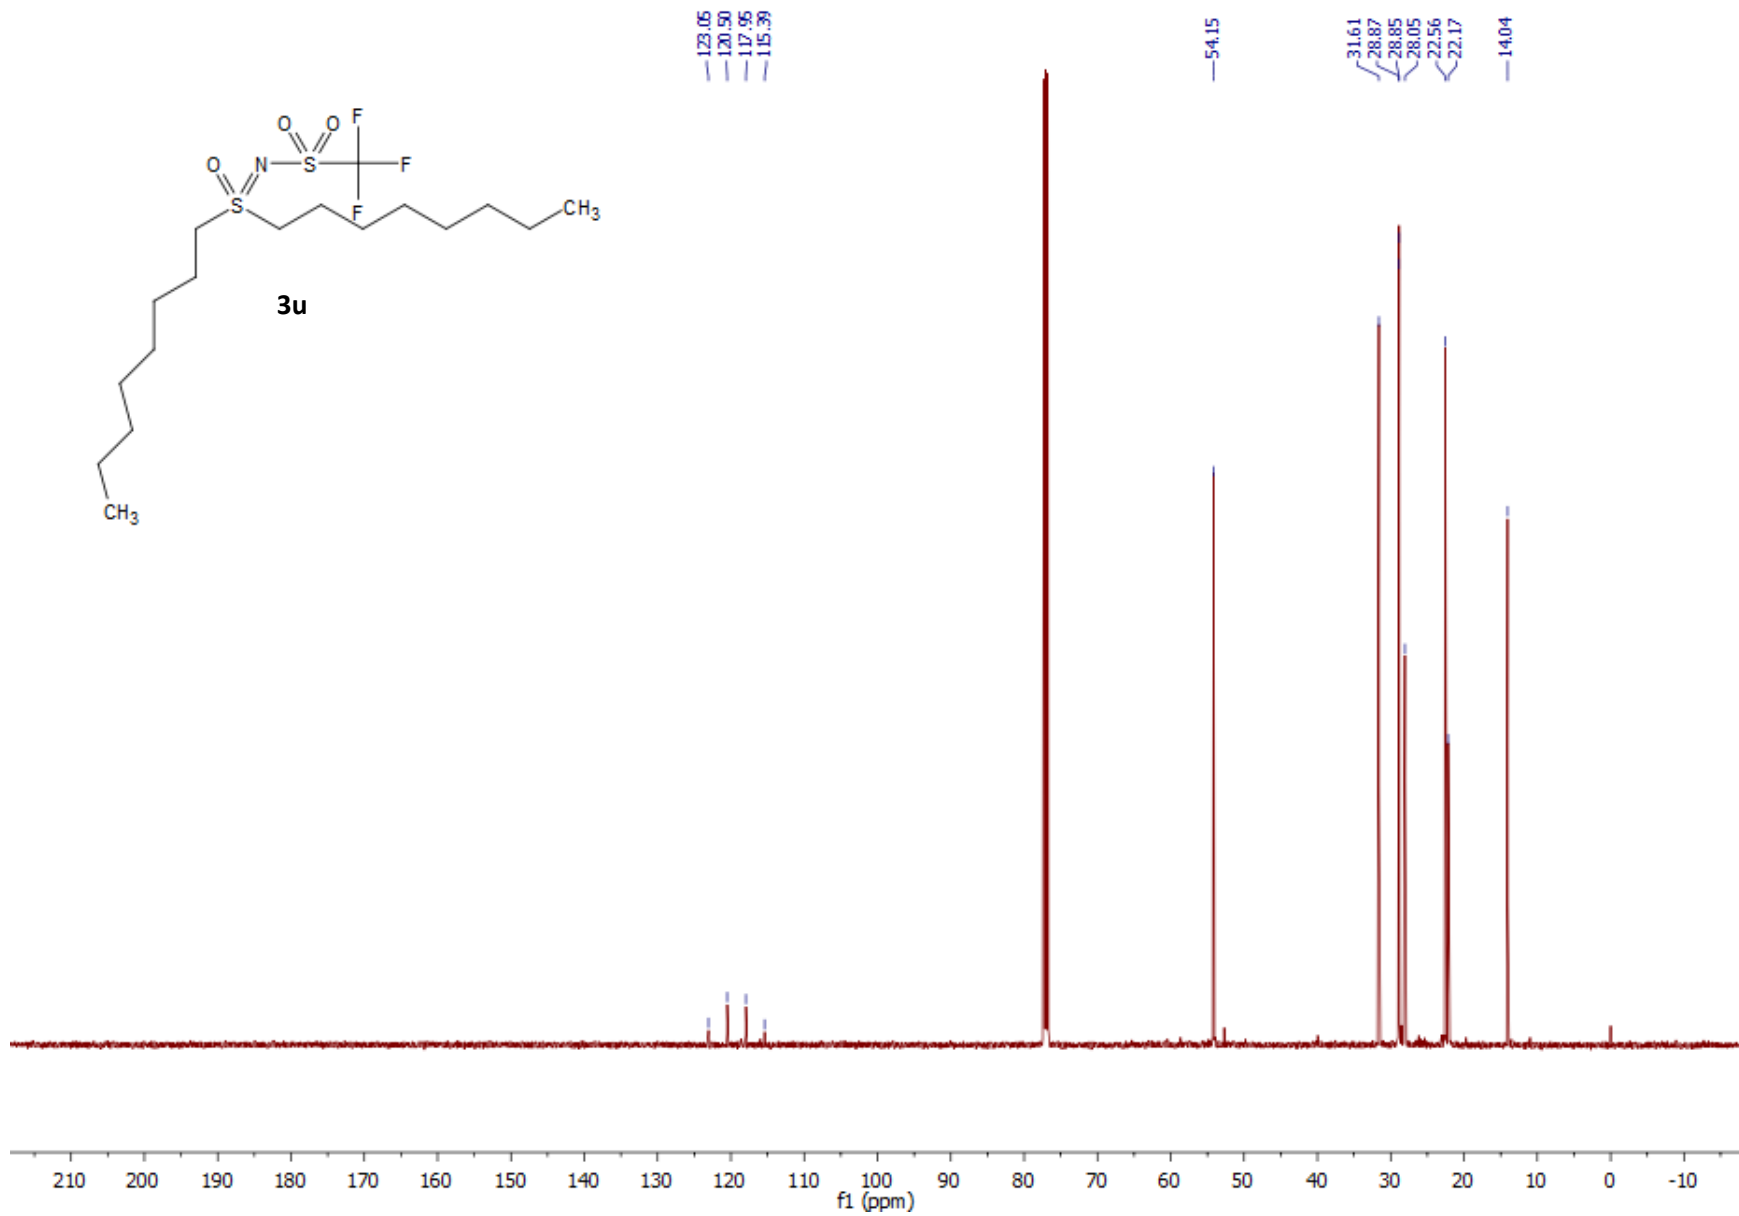

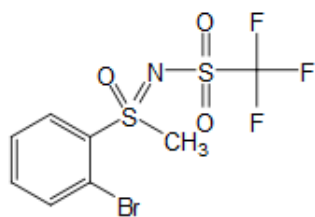

3v

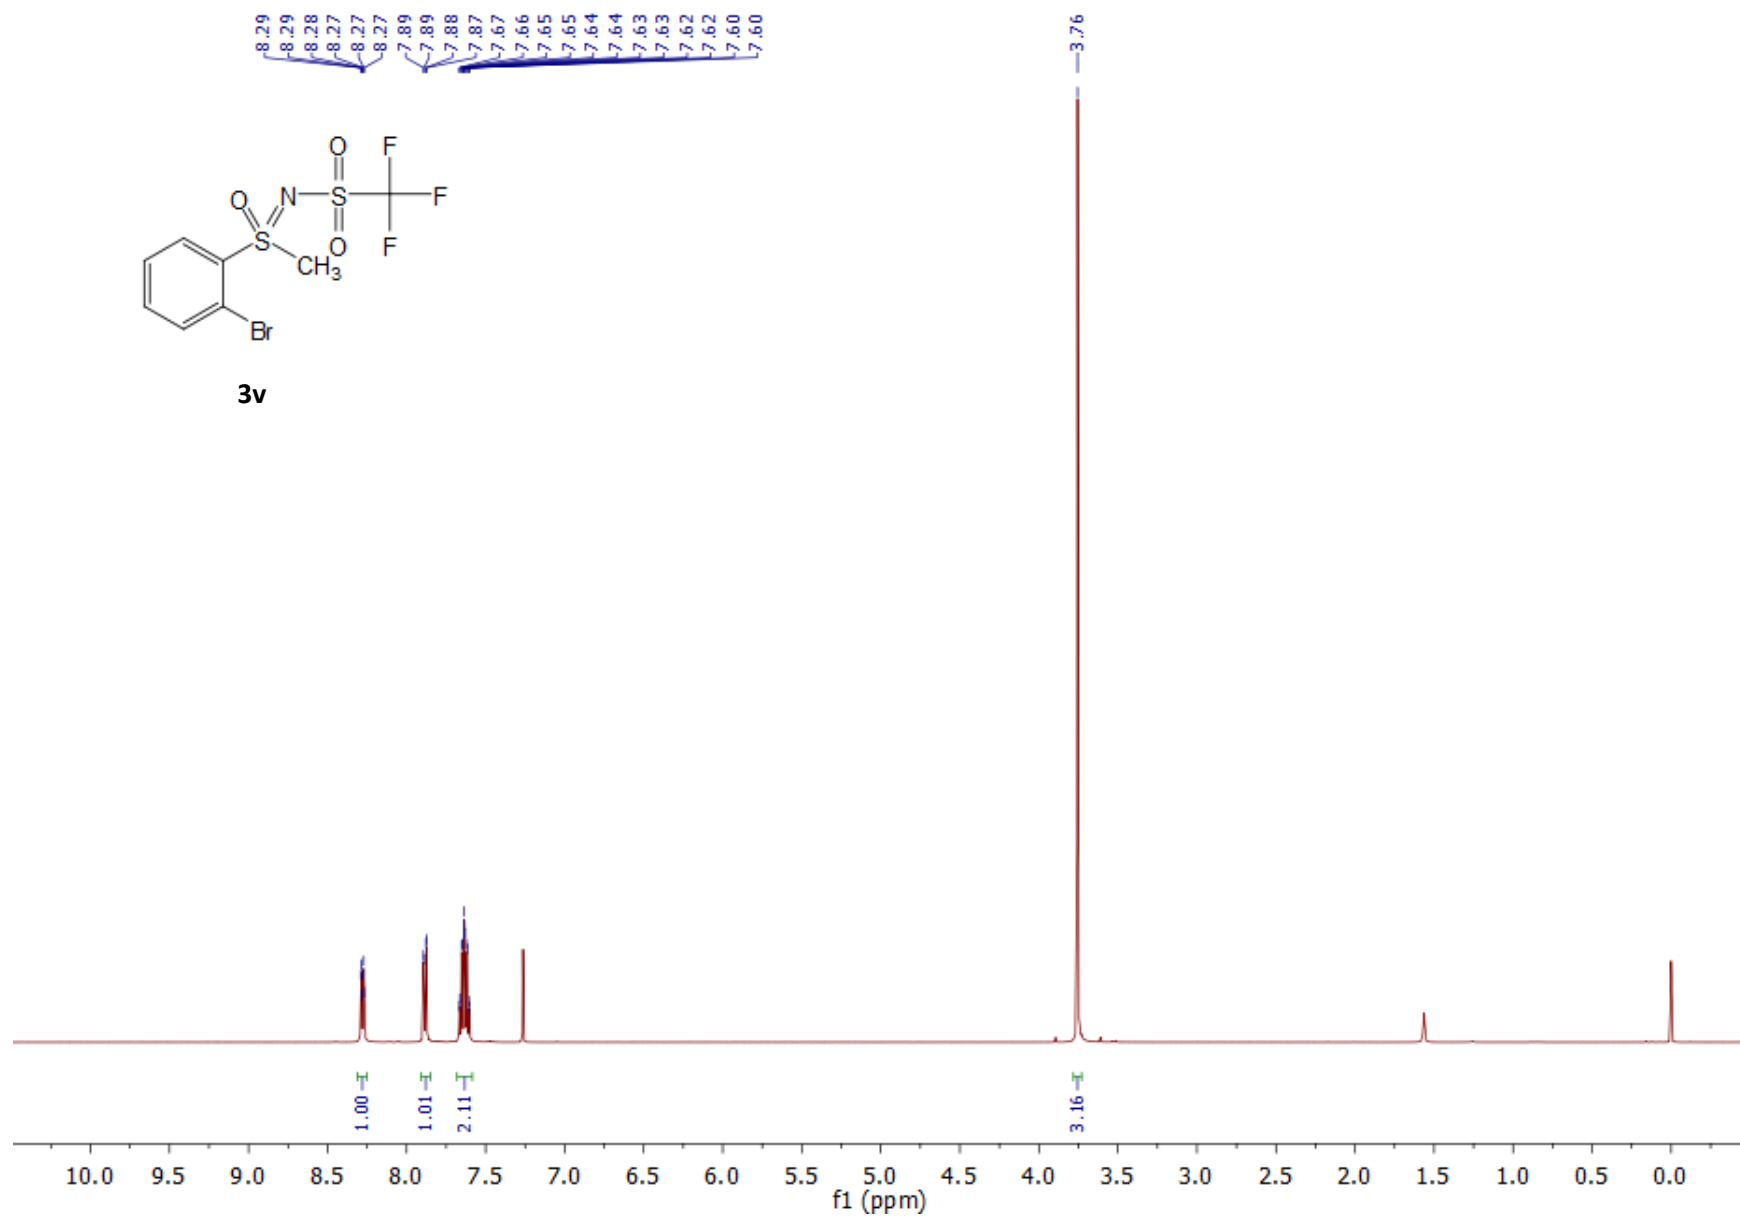

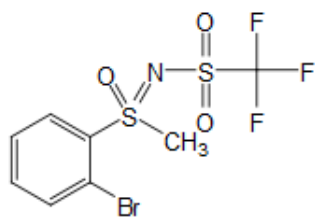

**3v**

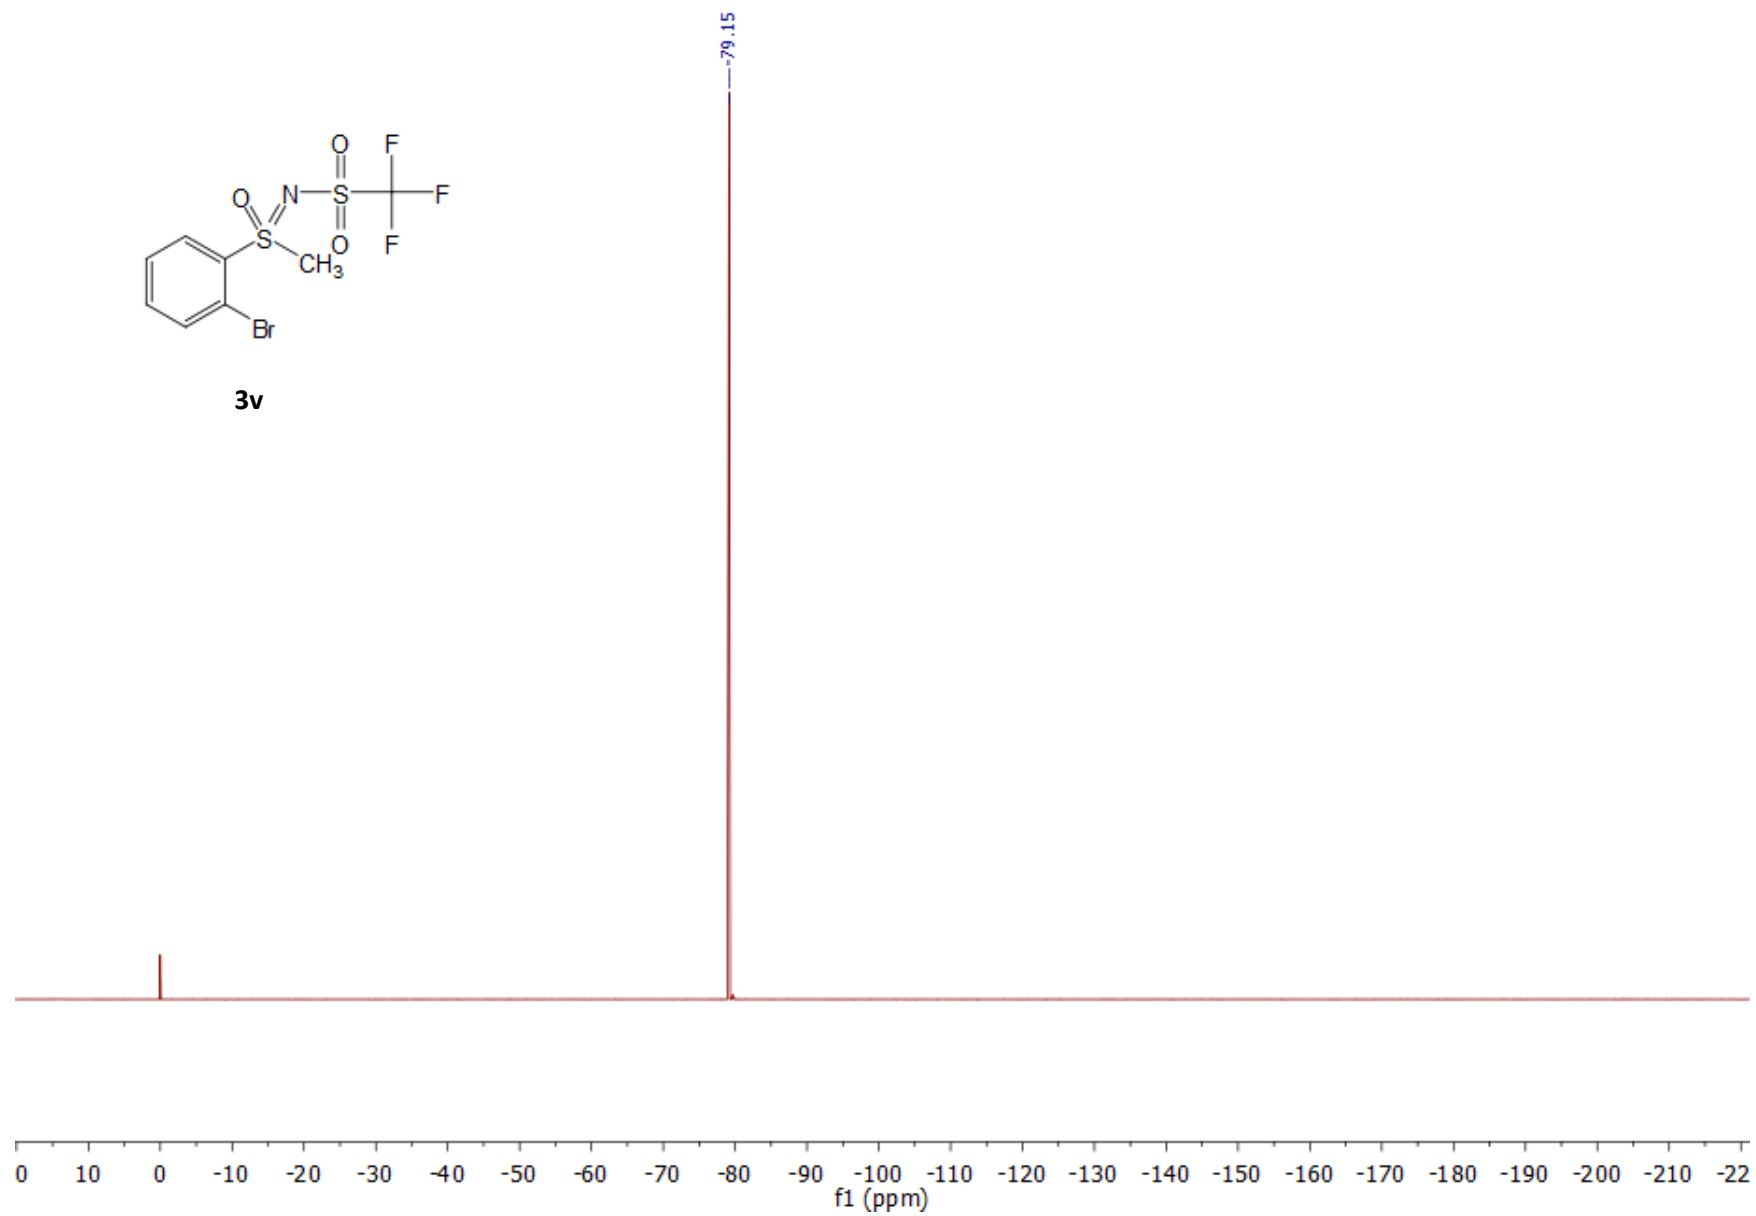

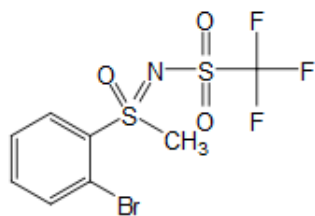

3v

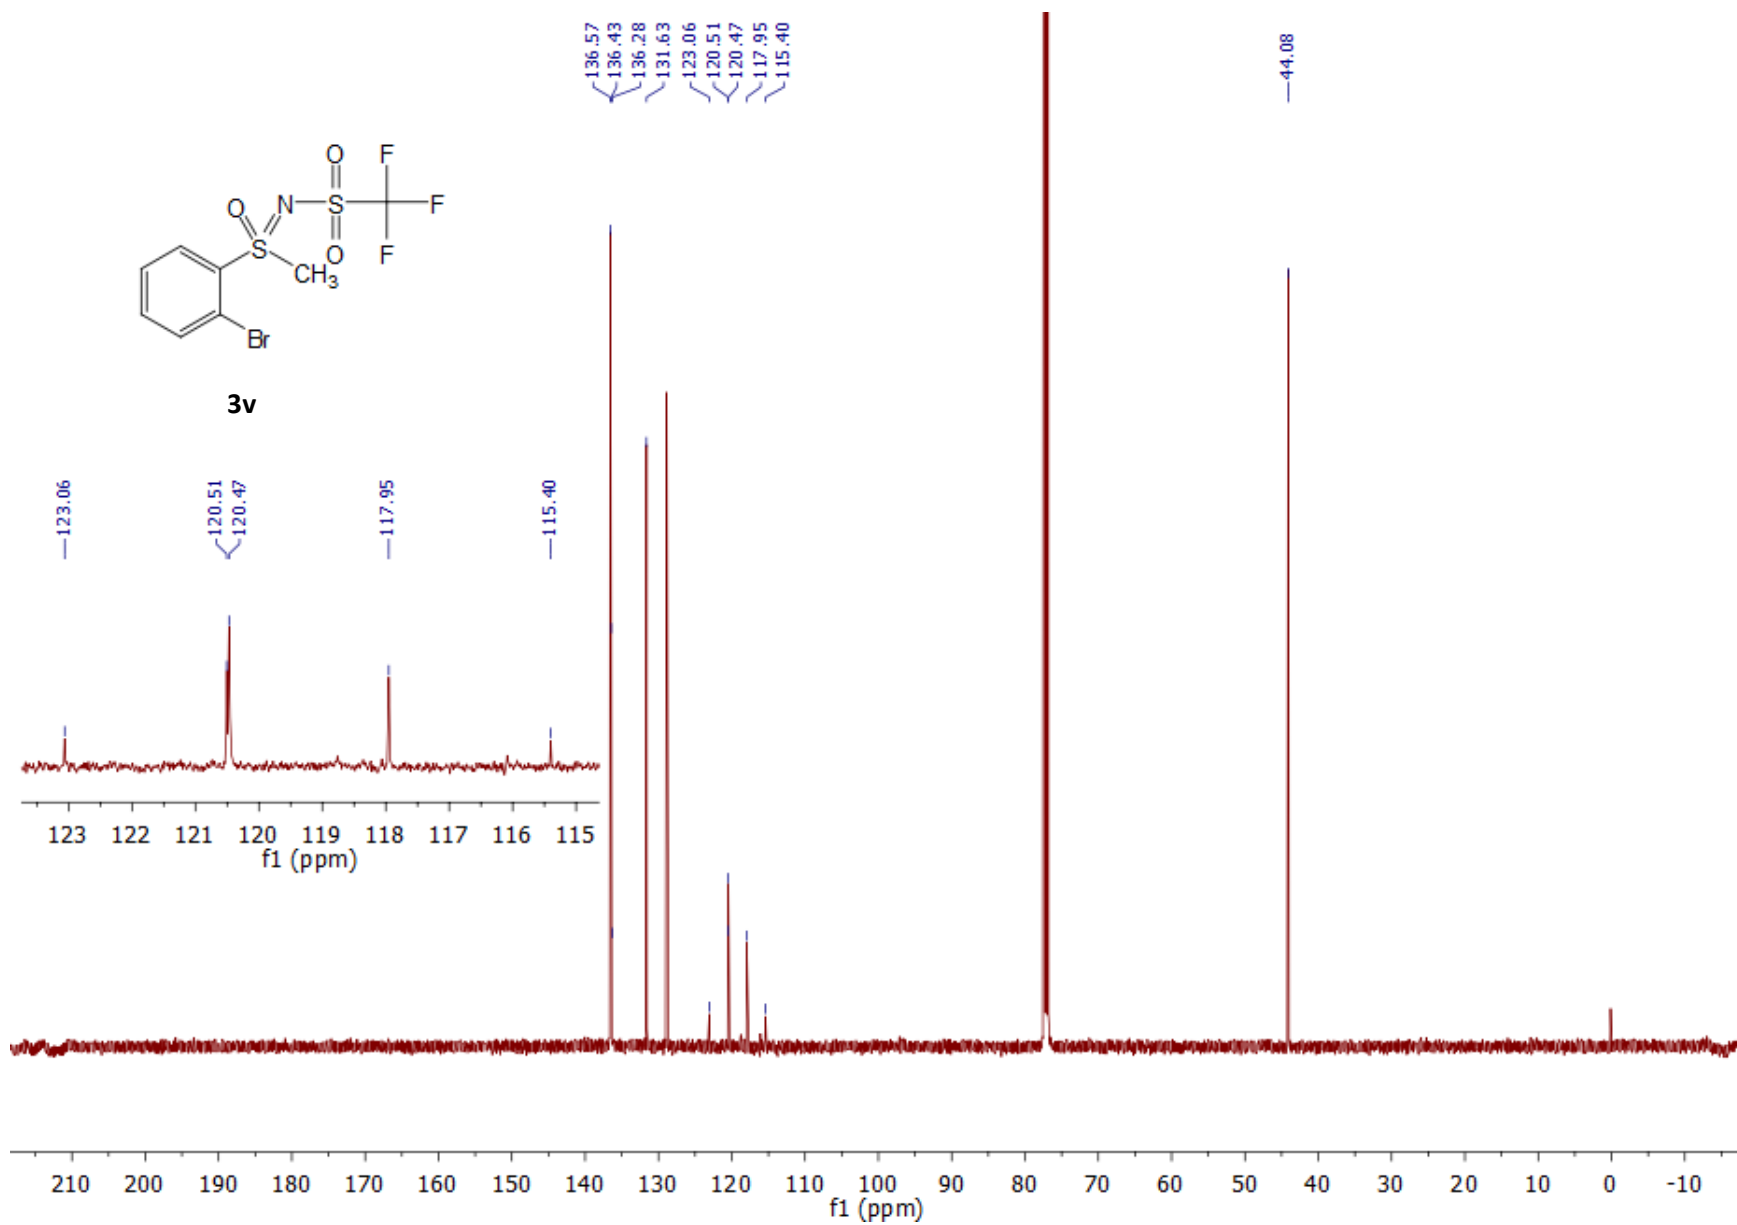

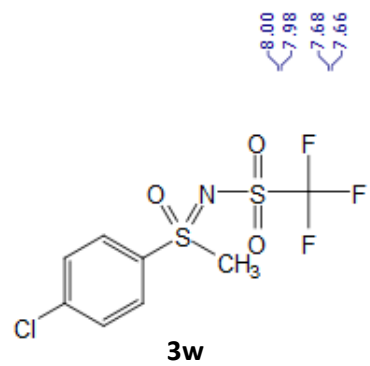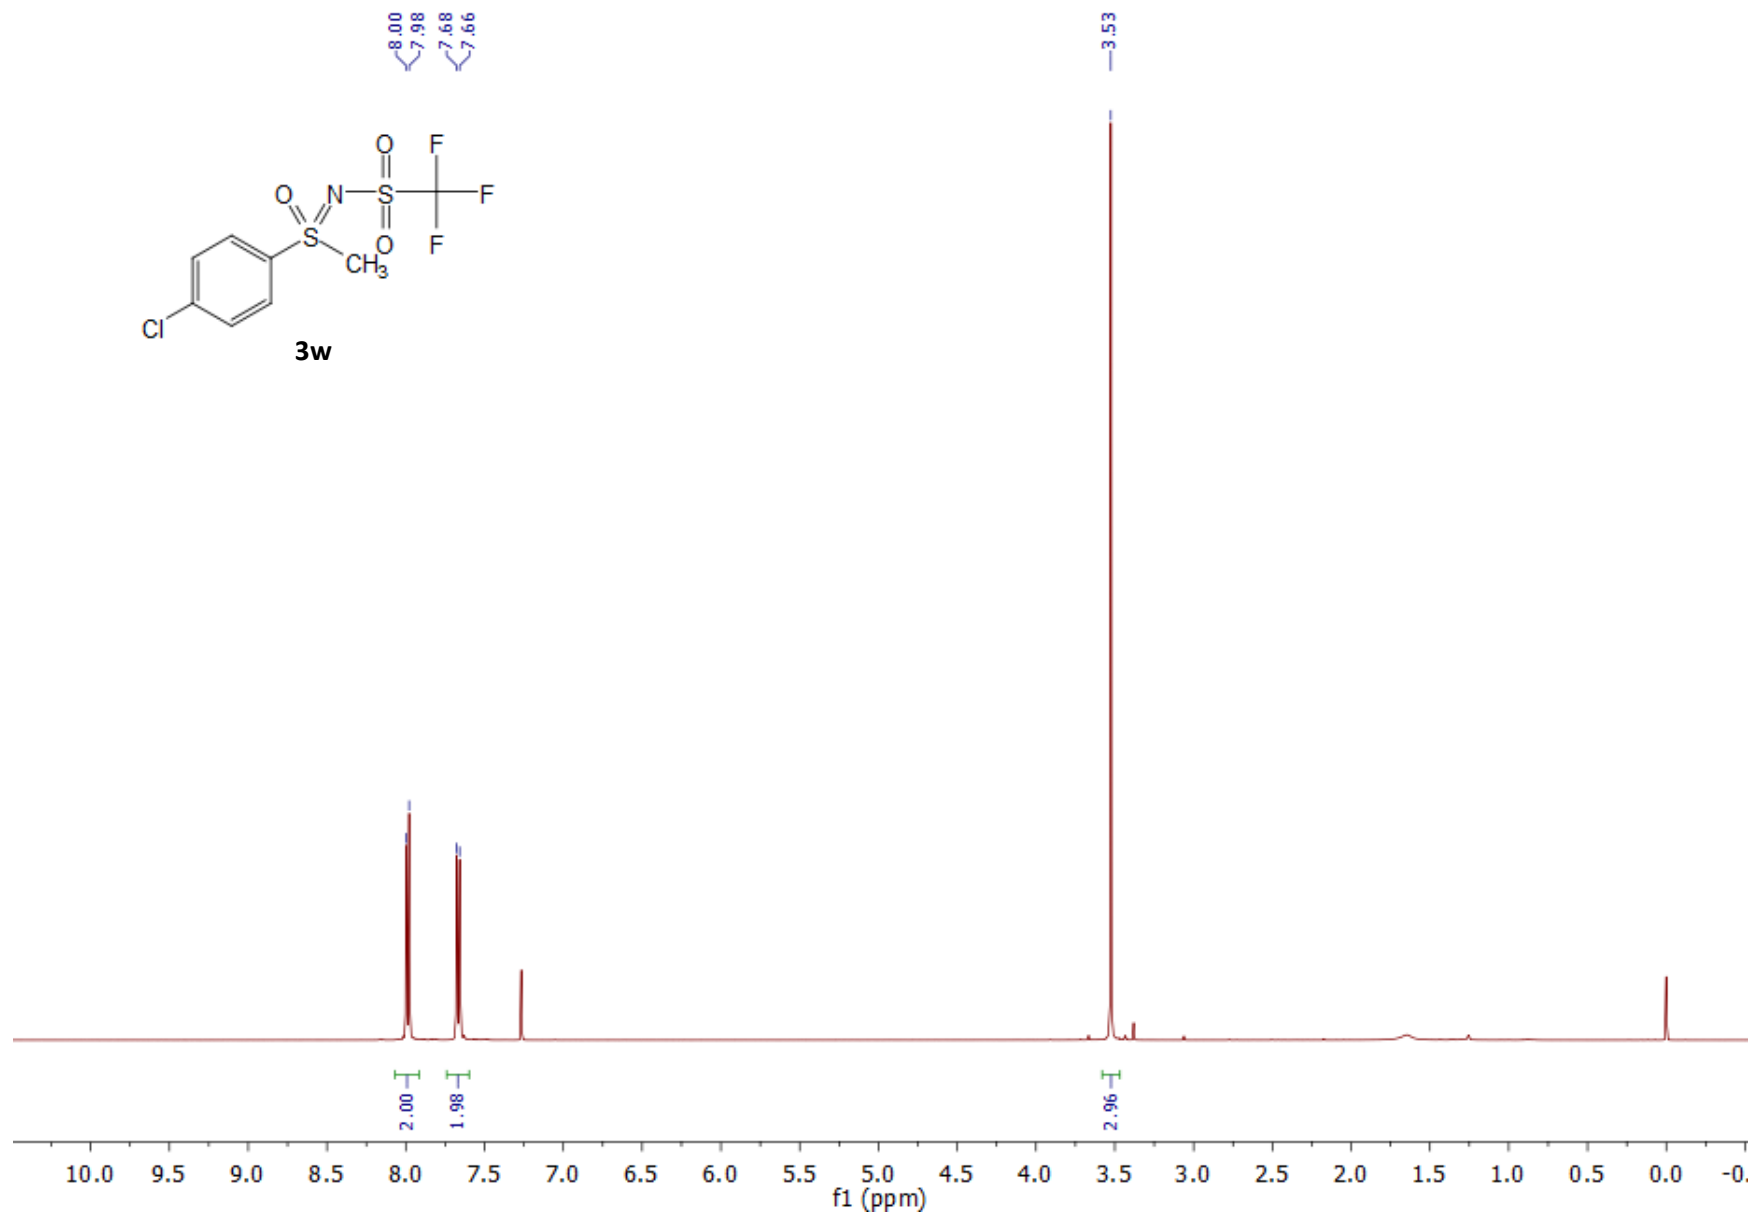



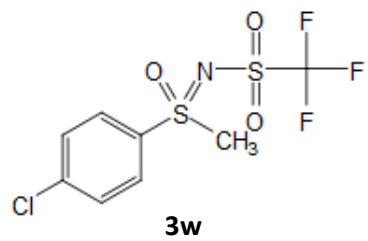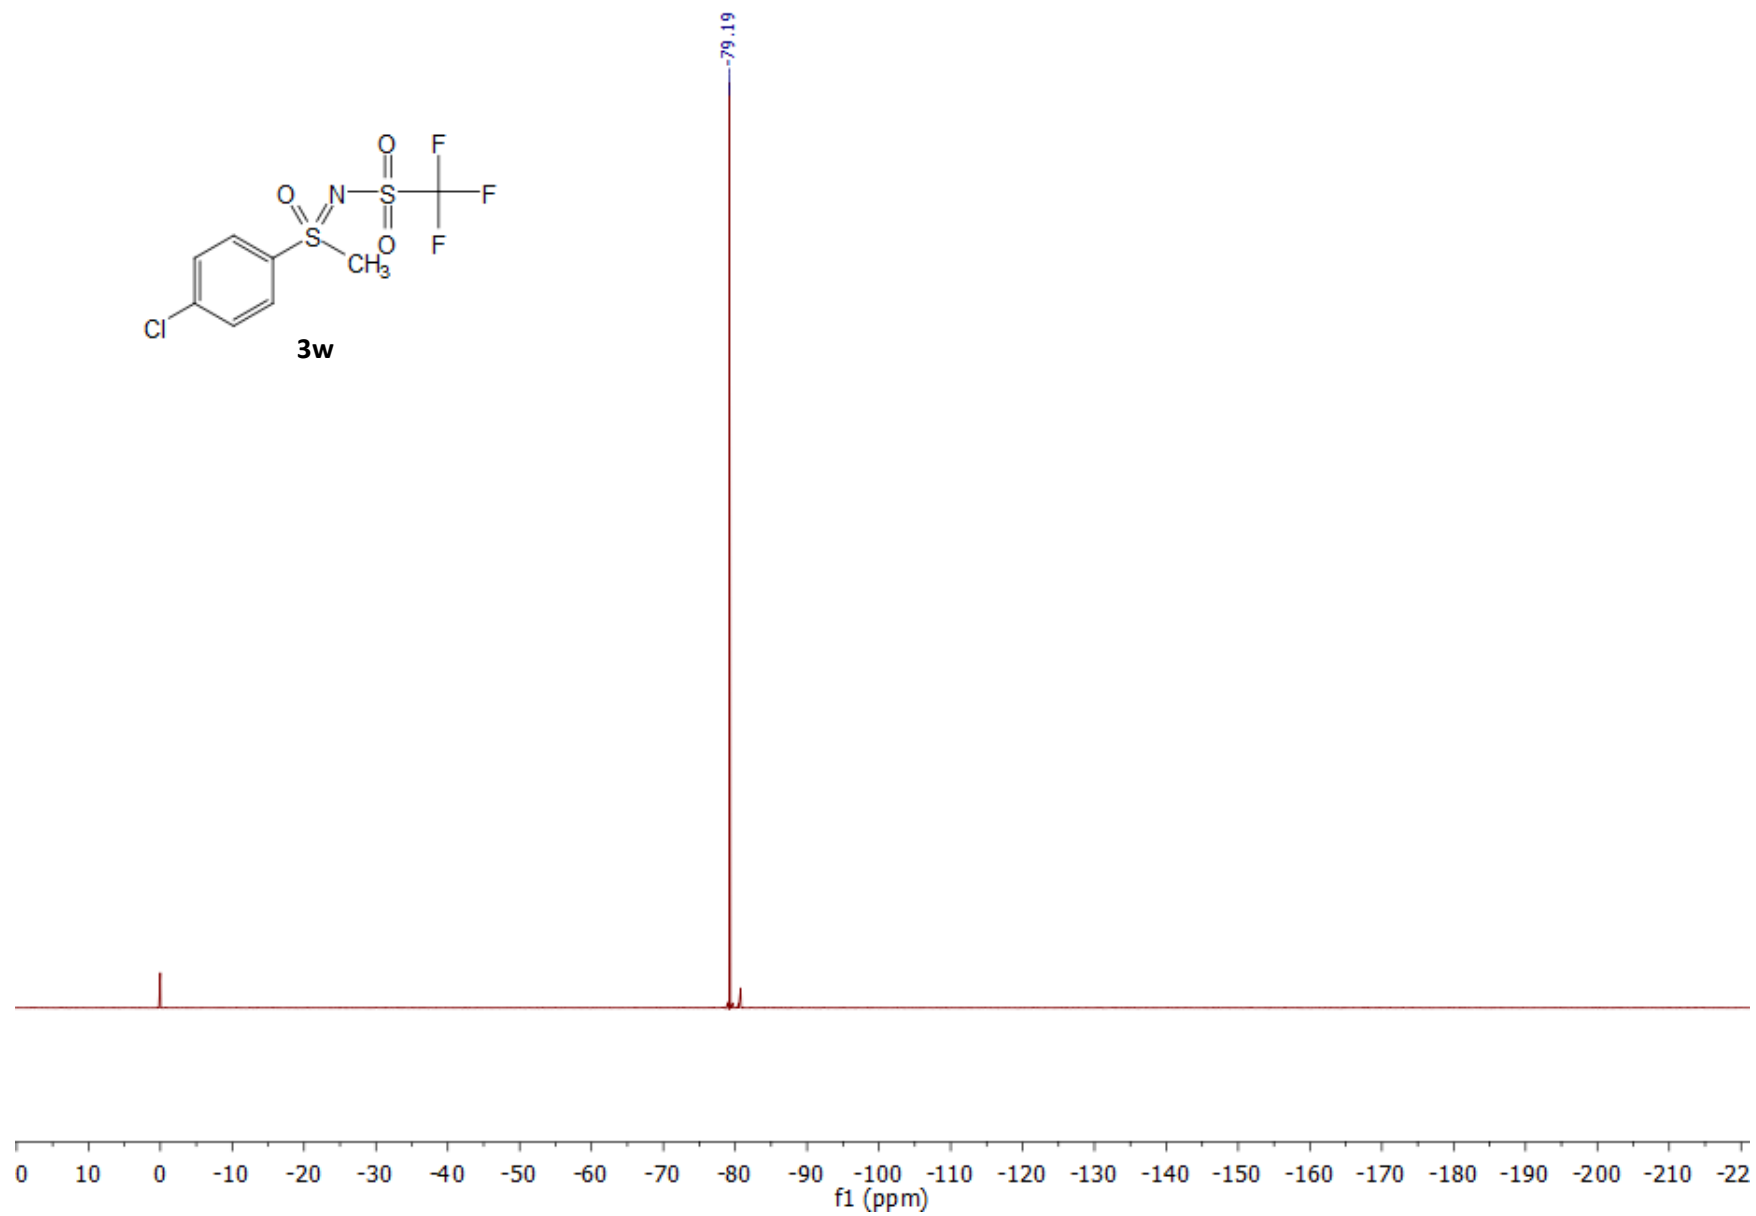

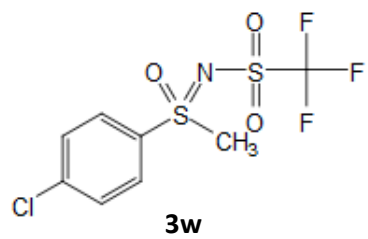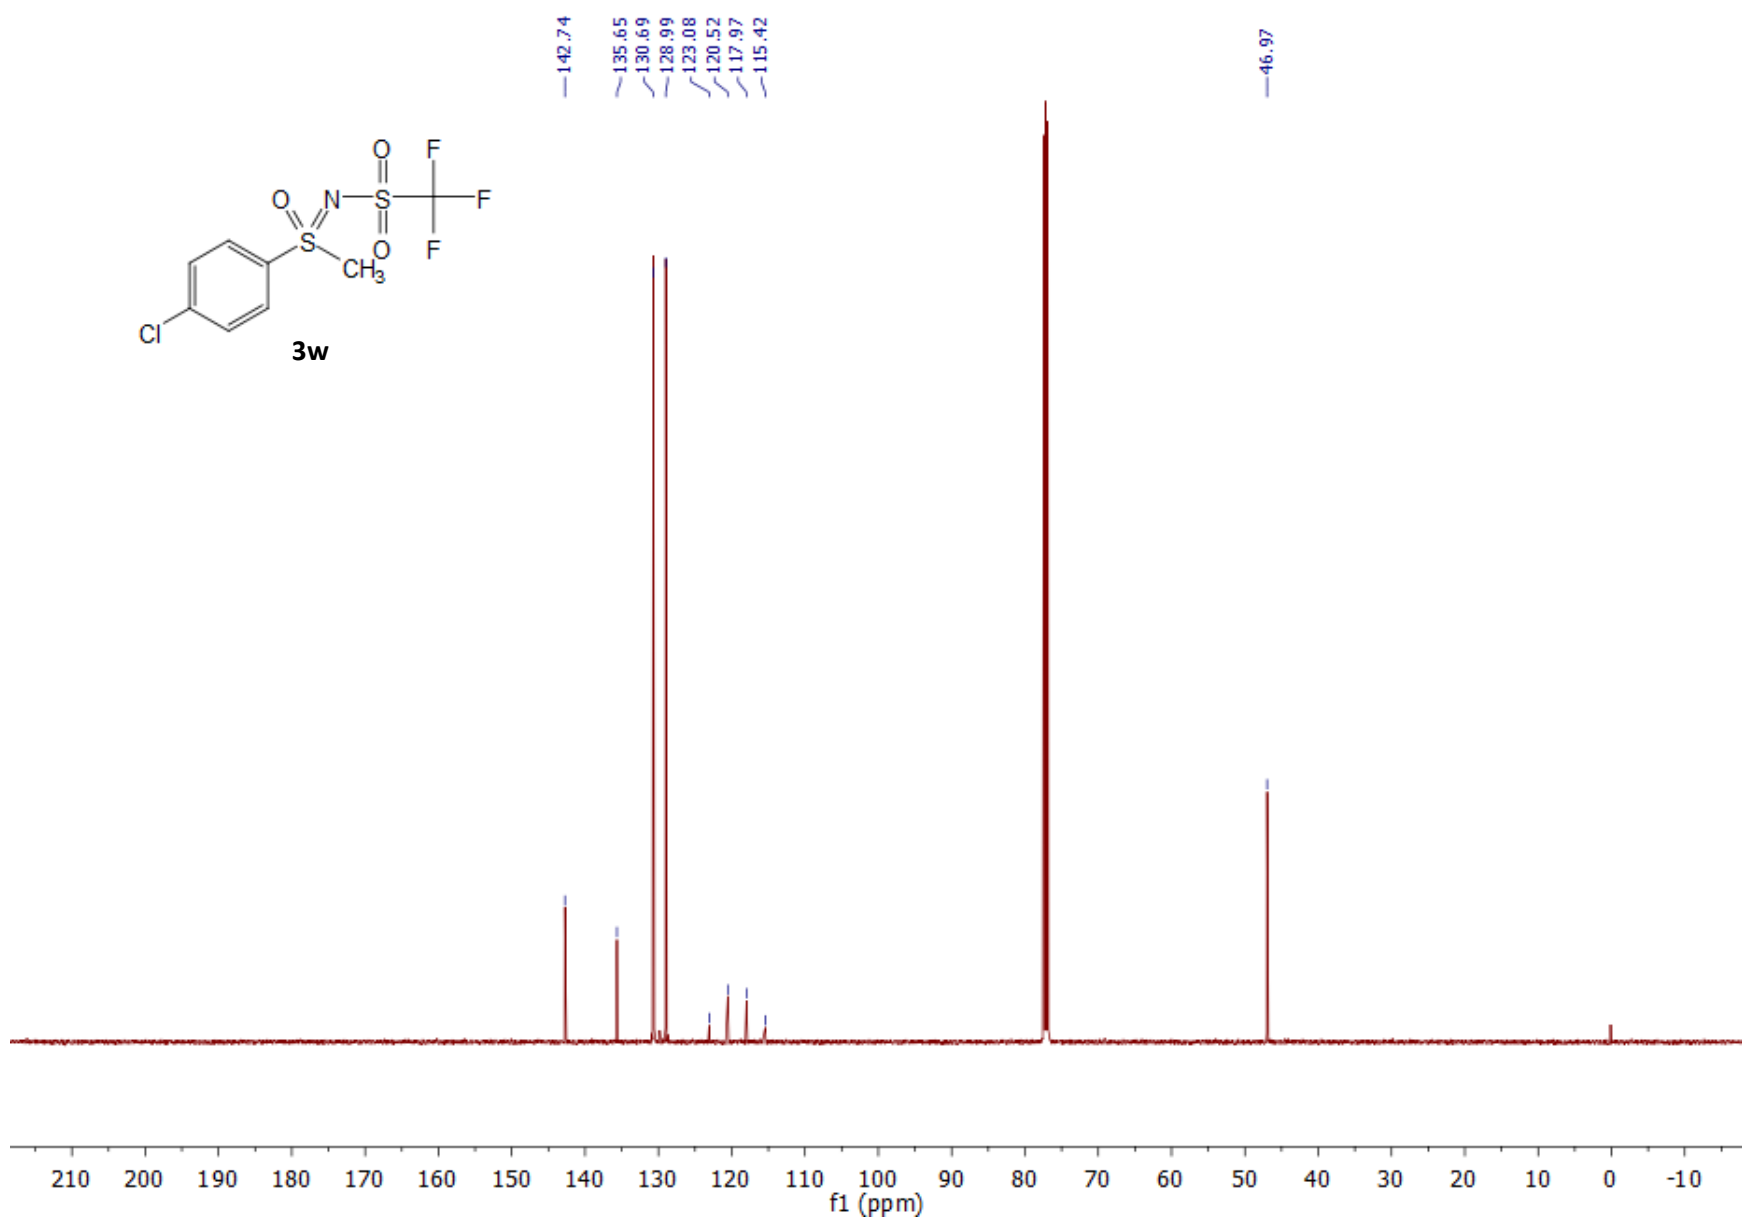

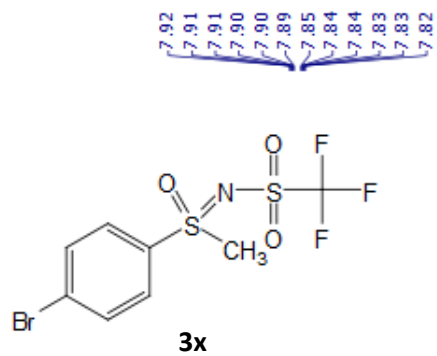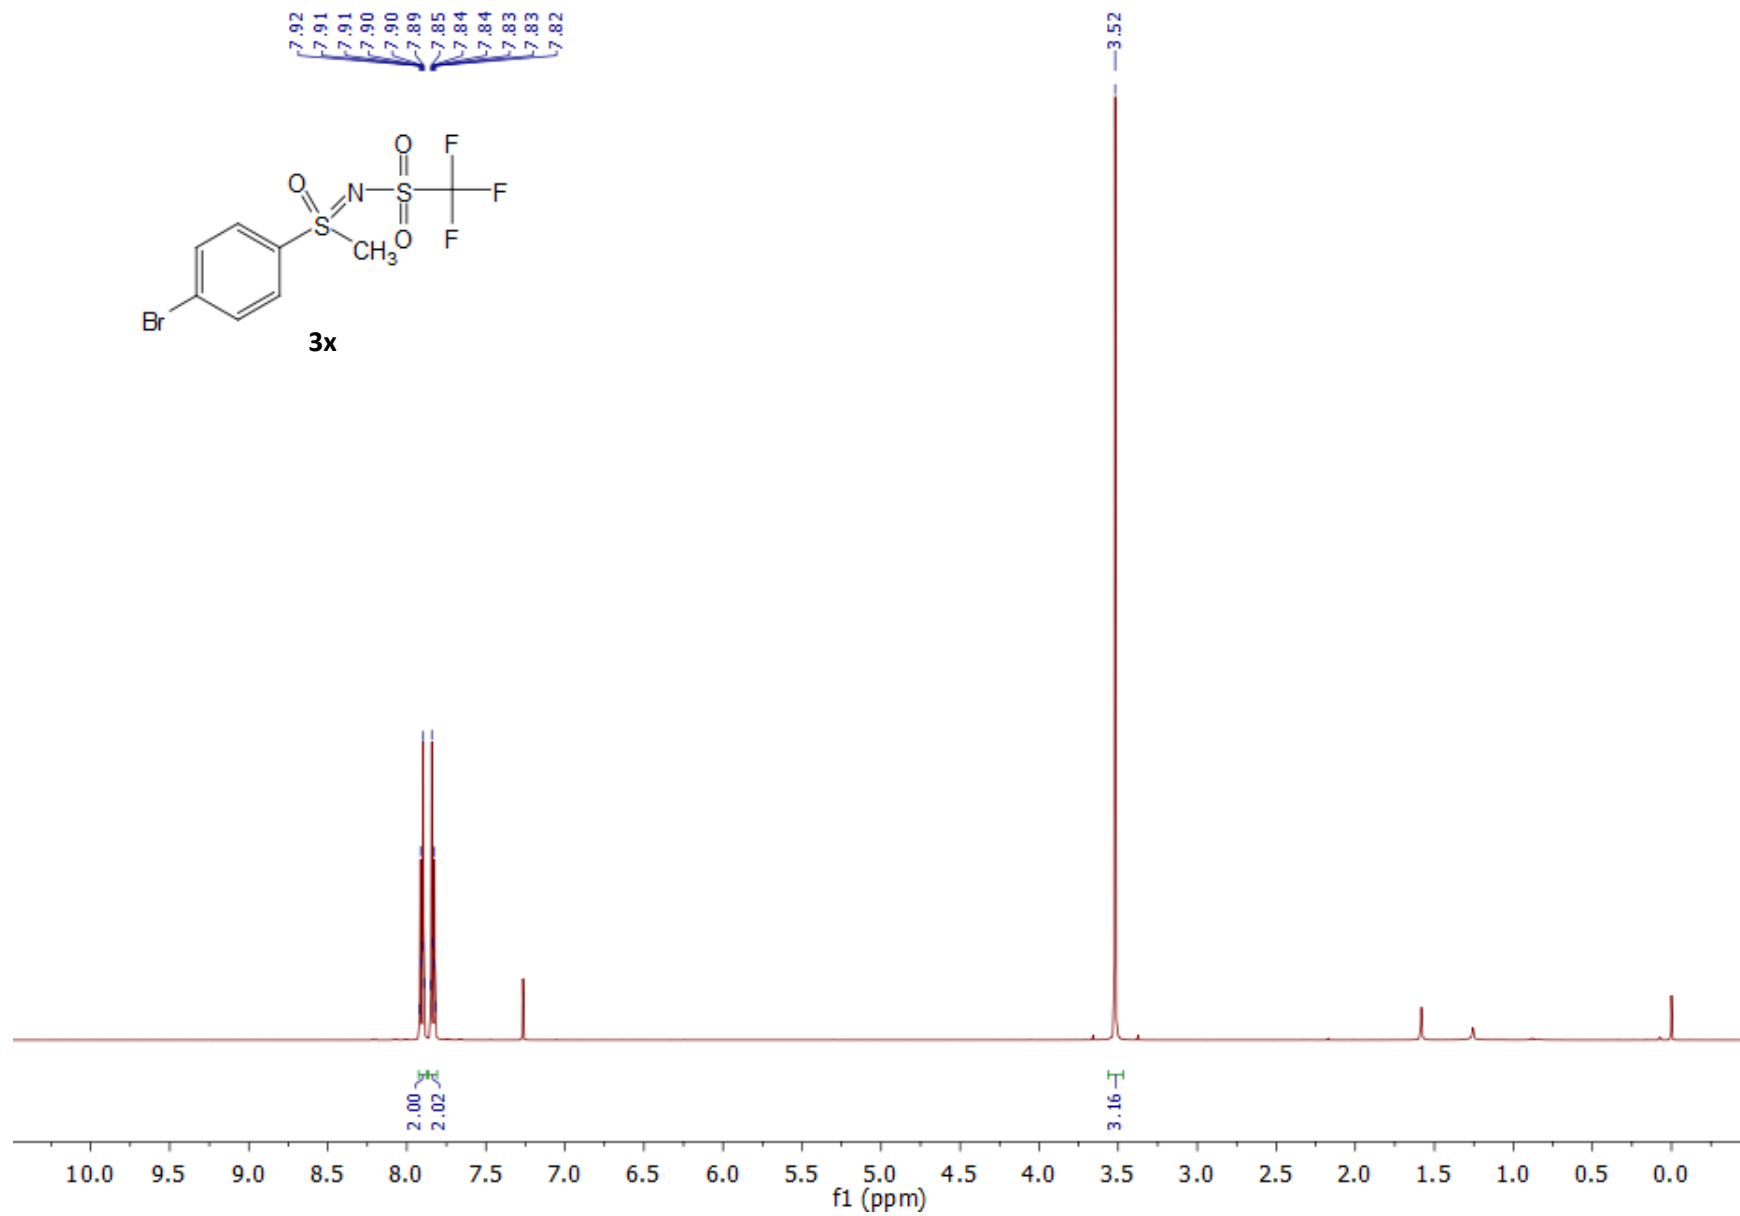

S91

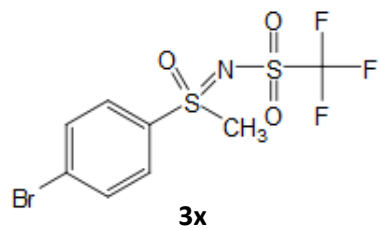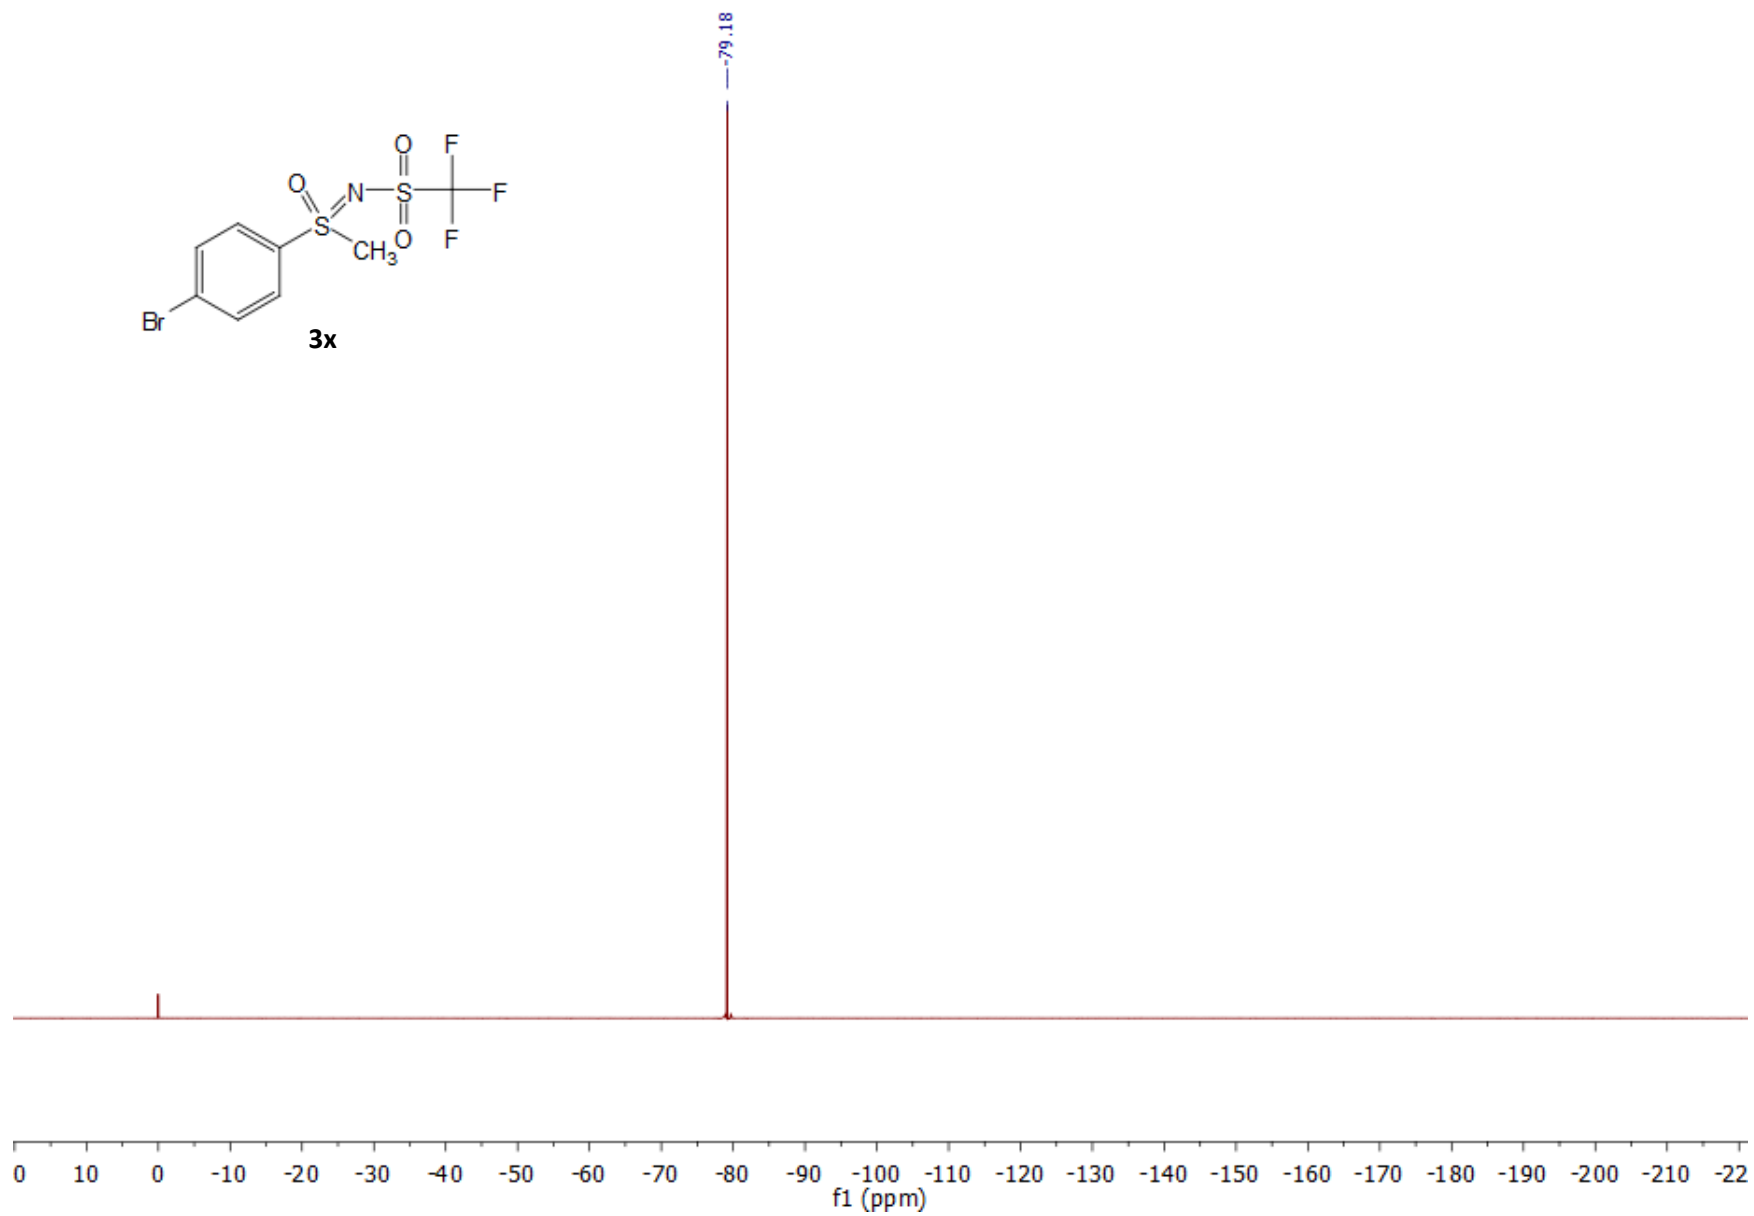

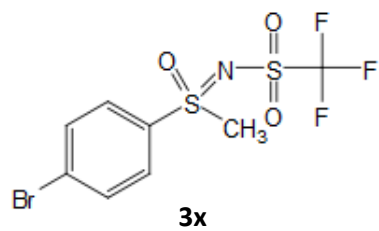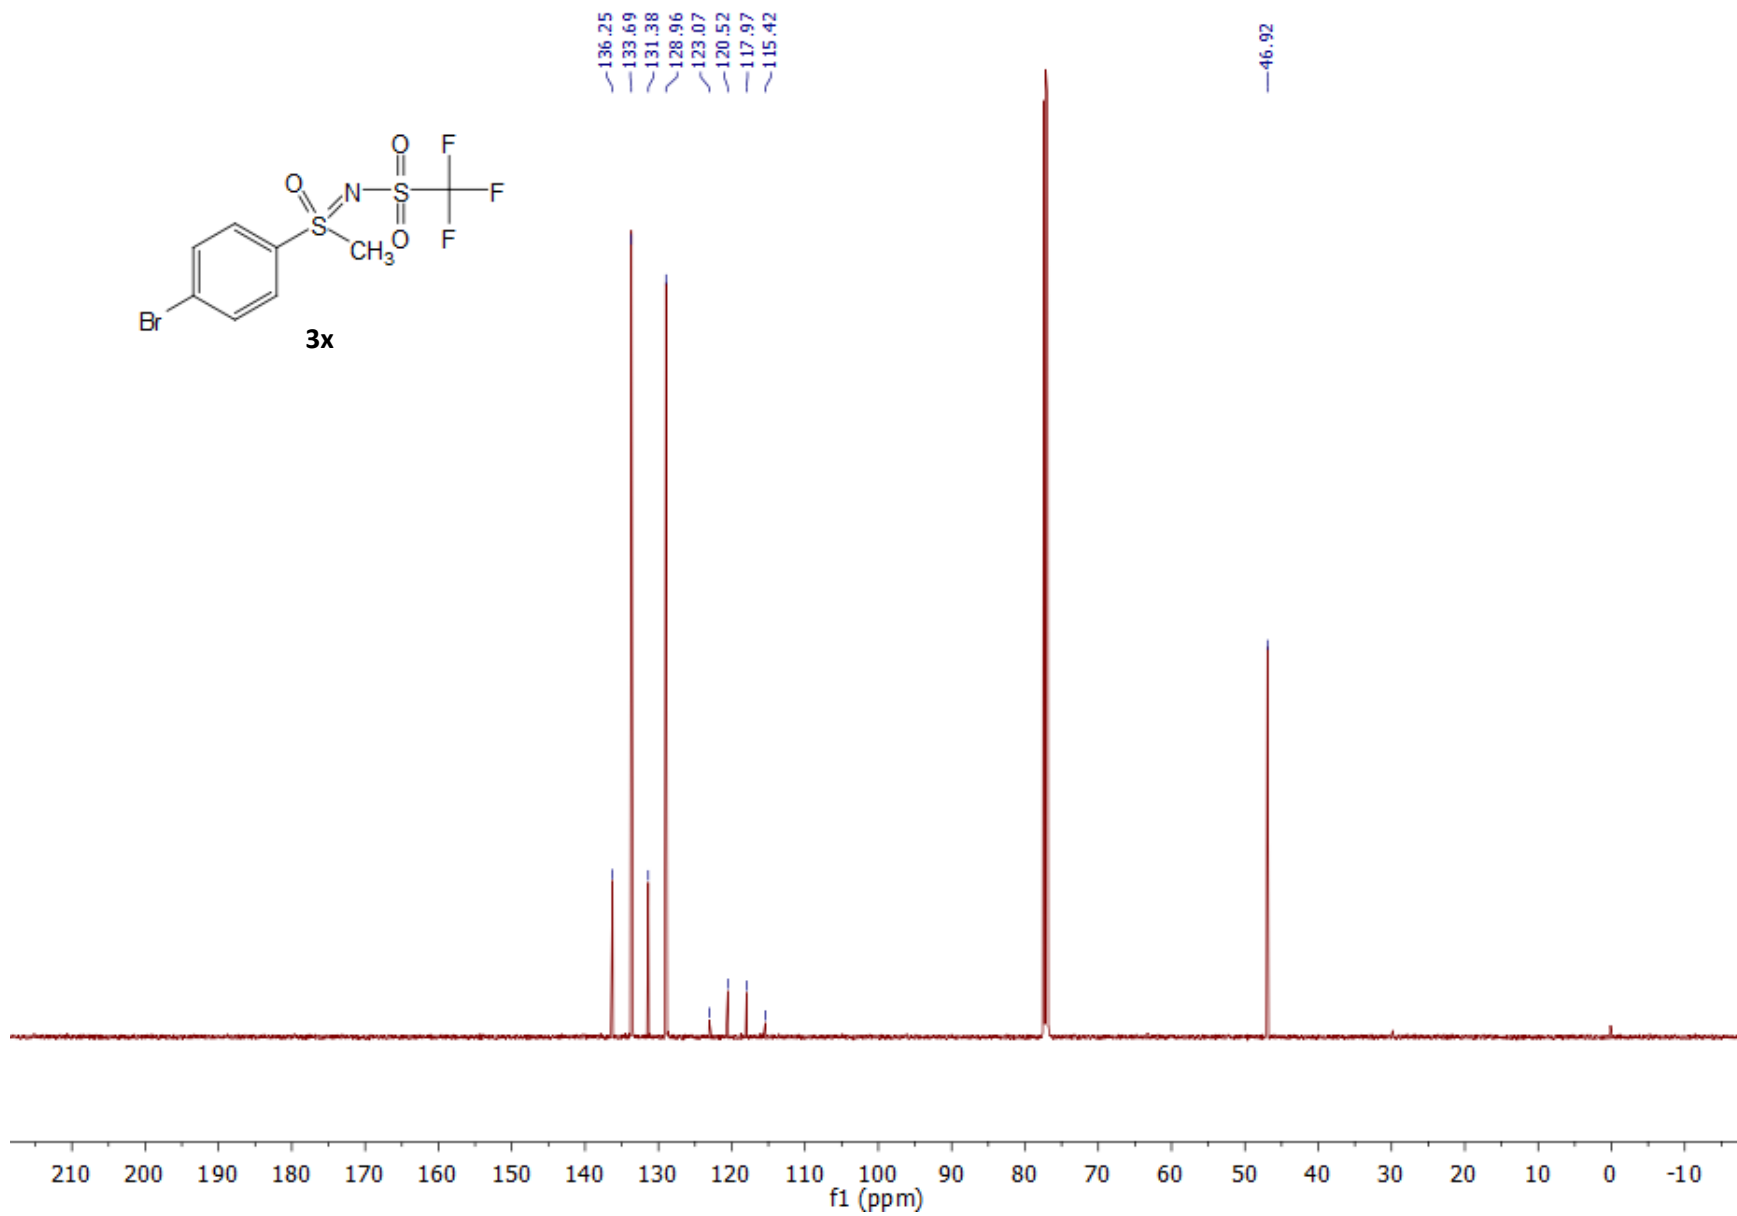

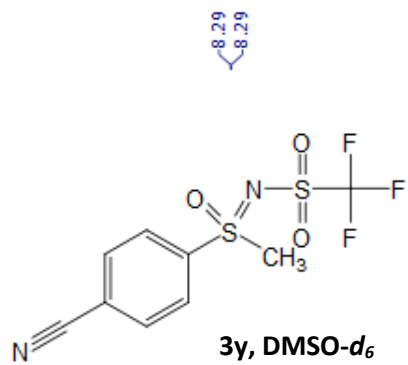

**3x**

4.00

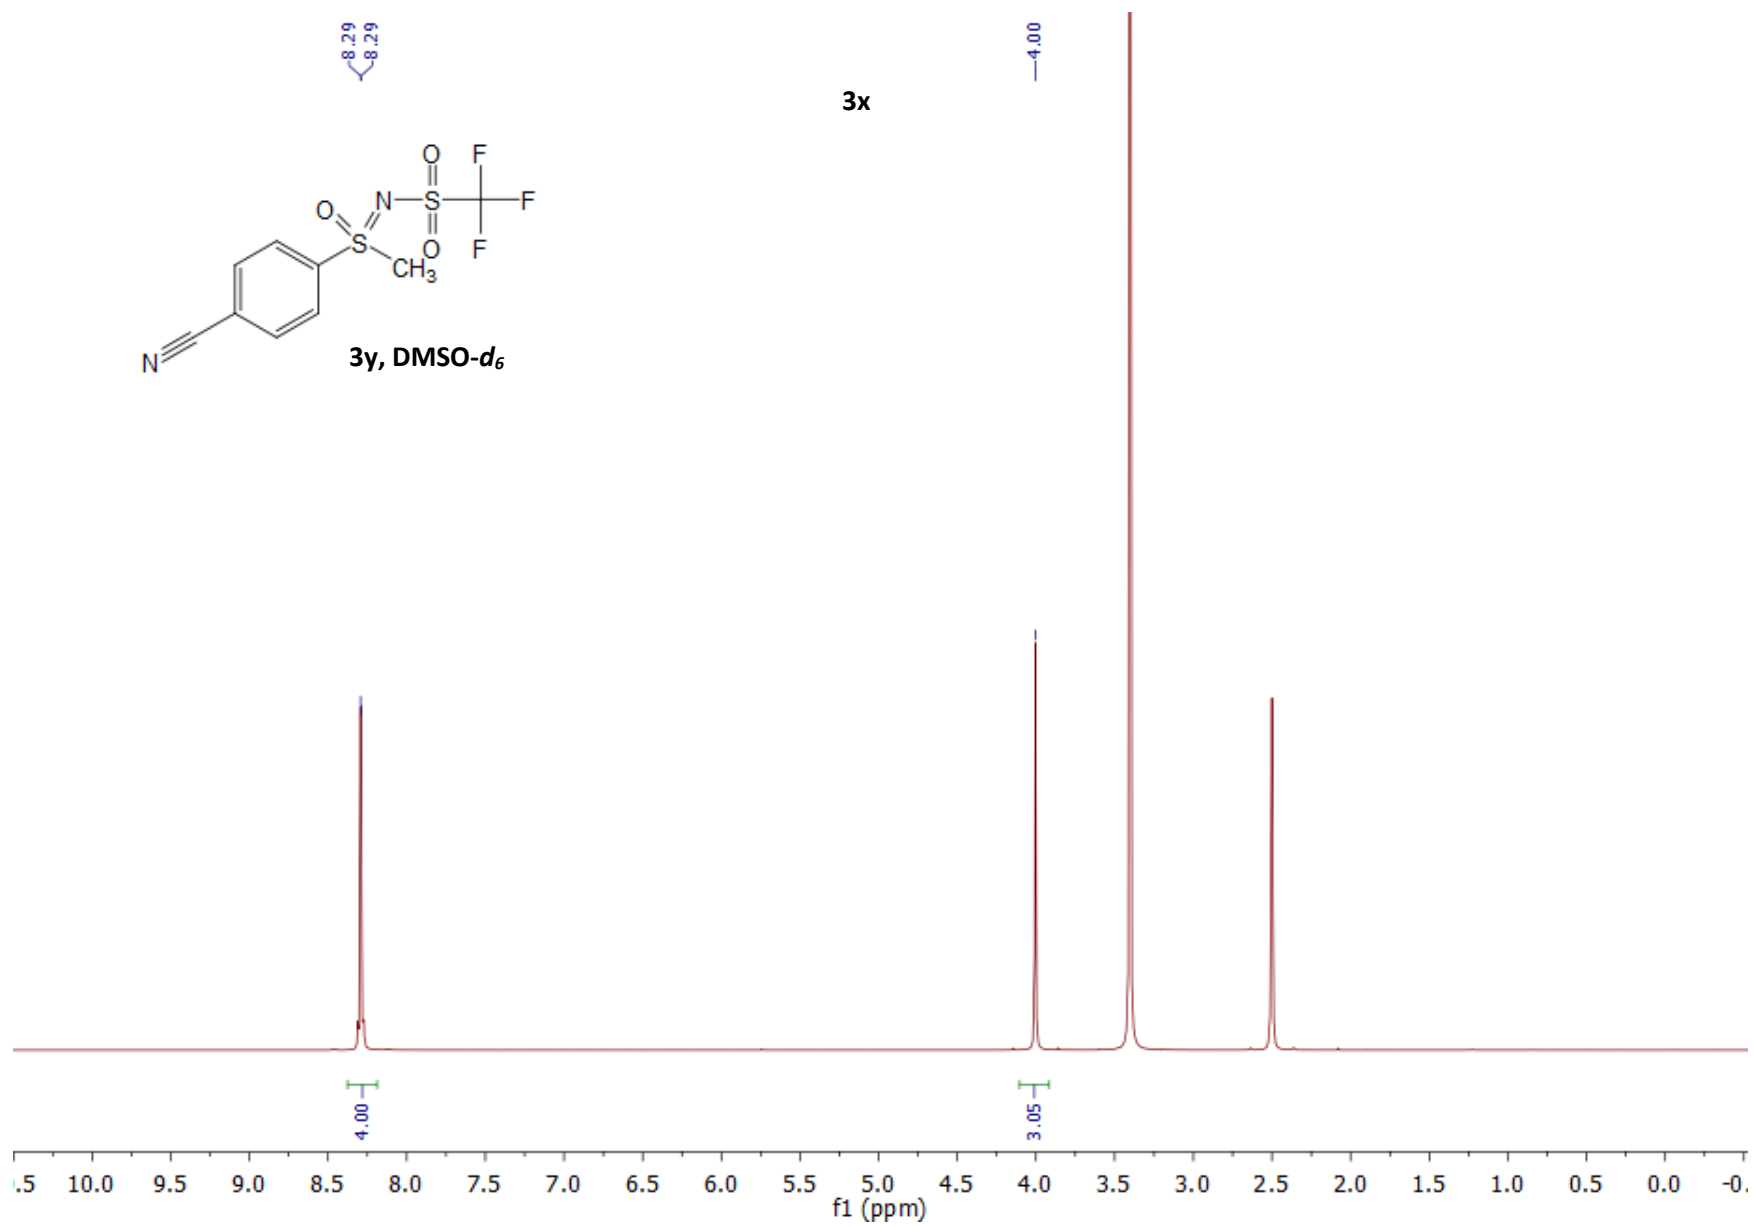

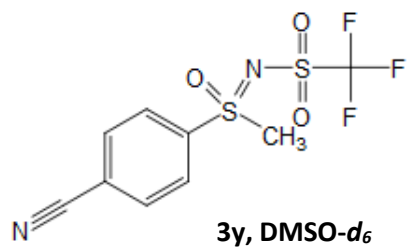

**3x**

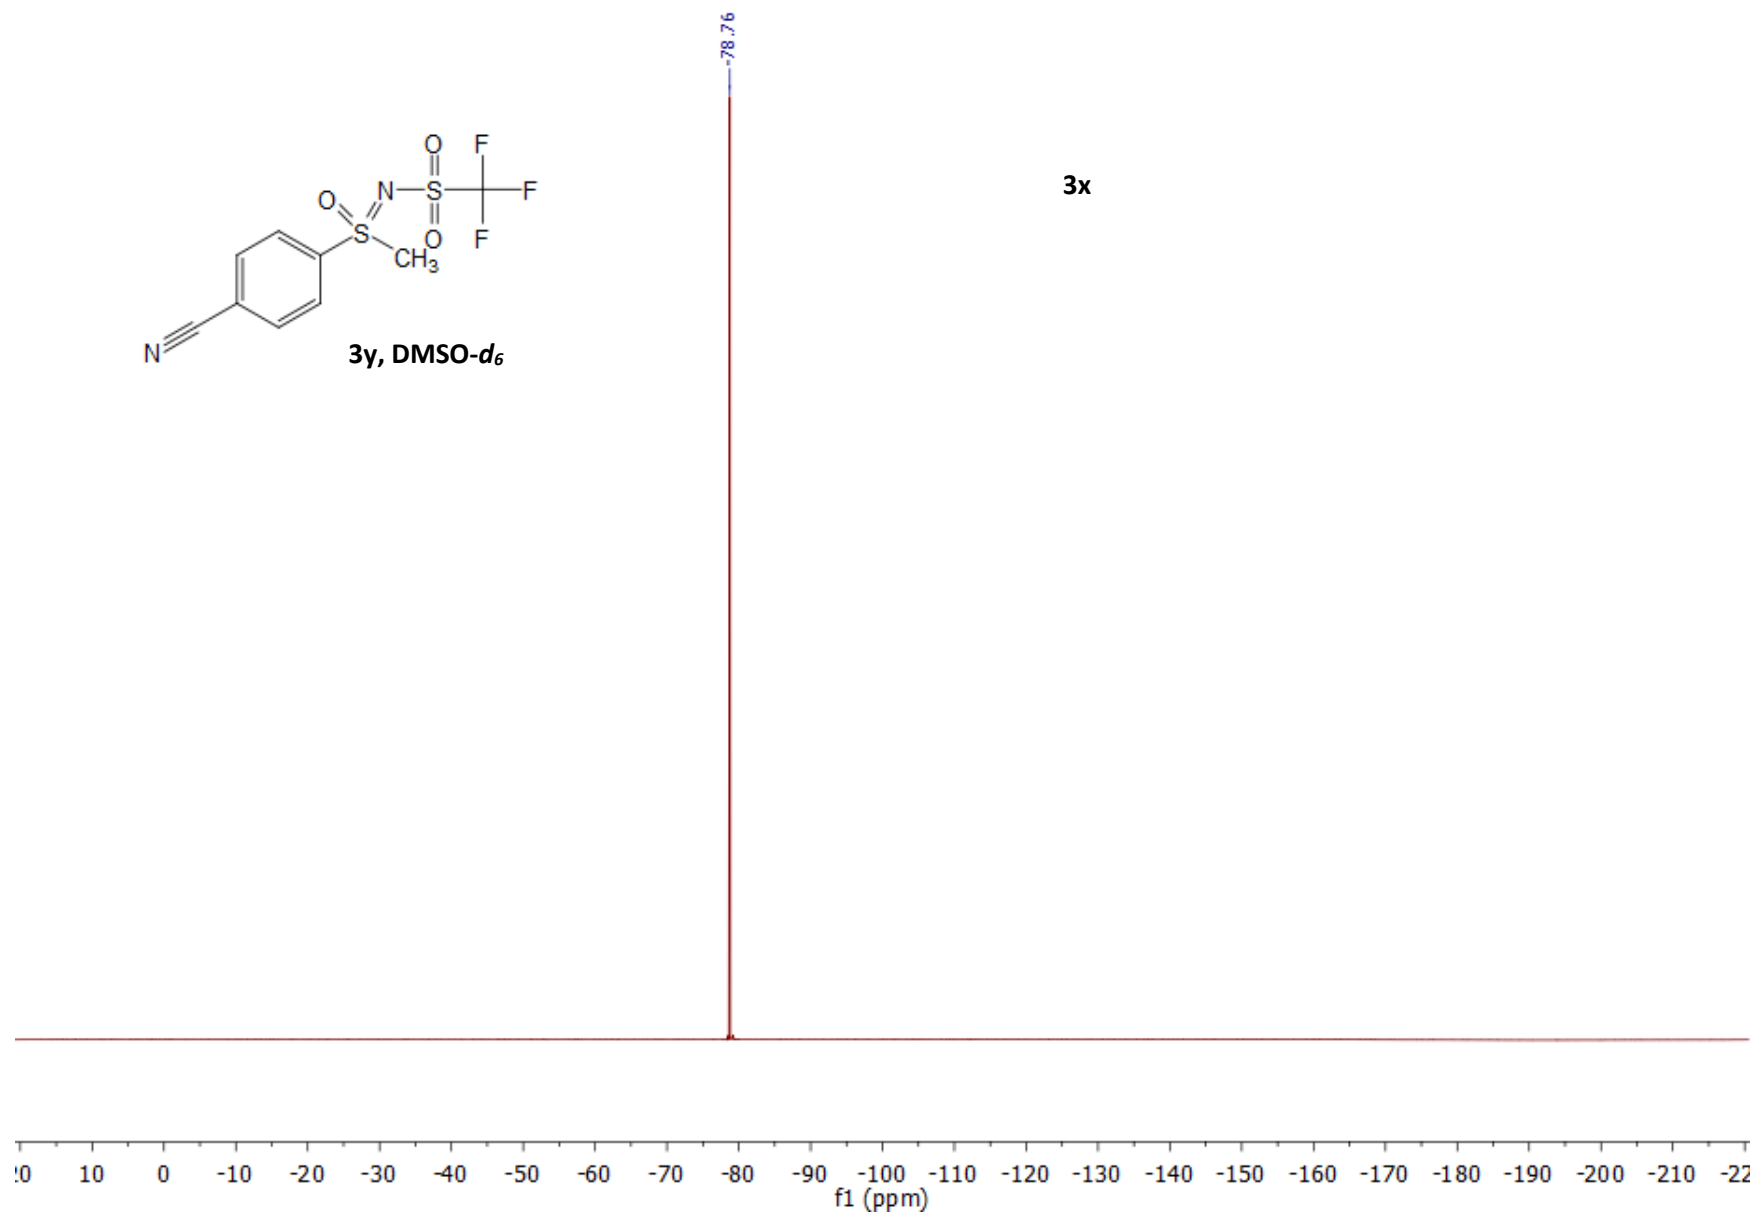

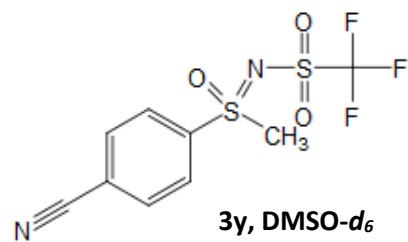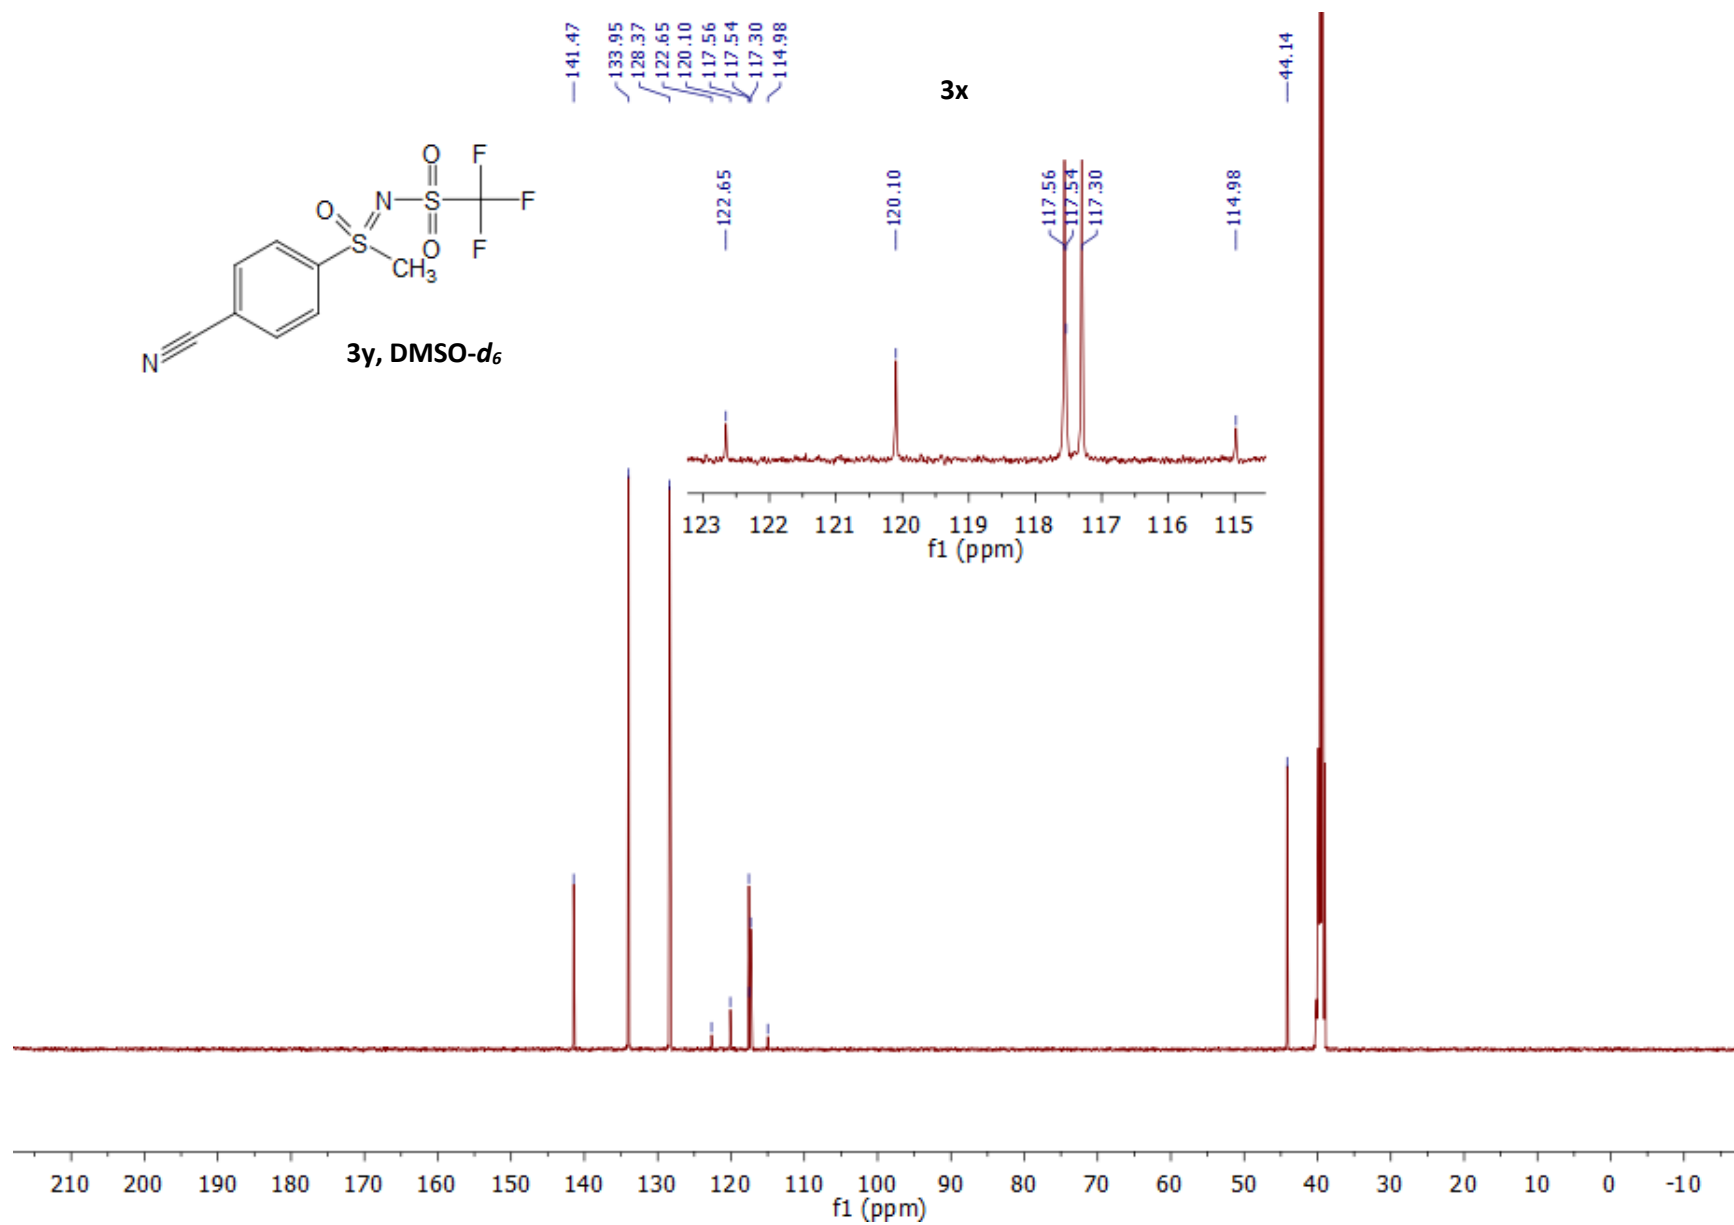



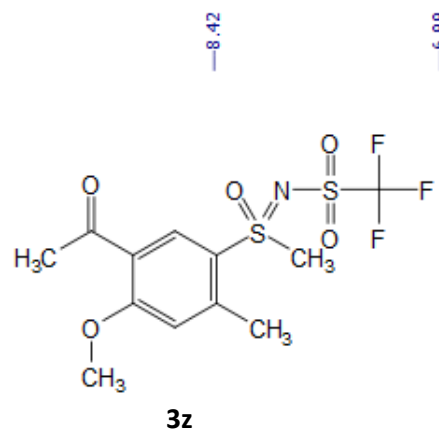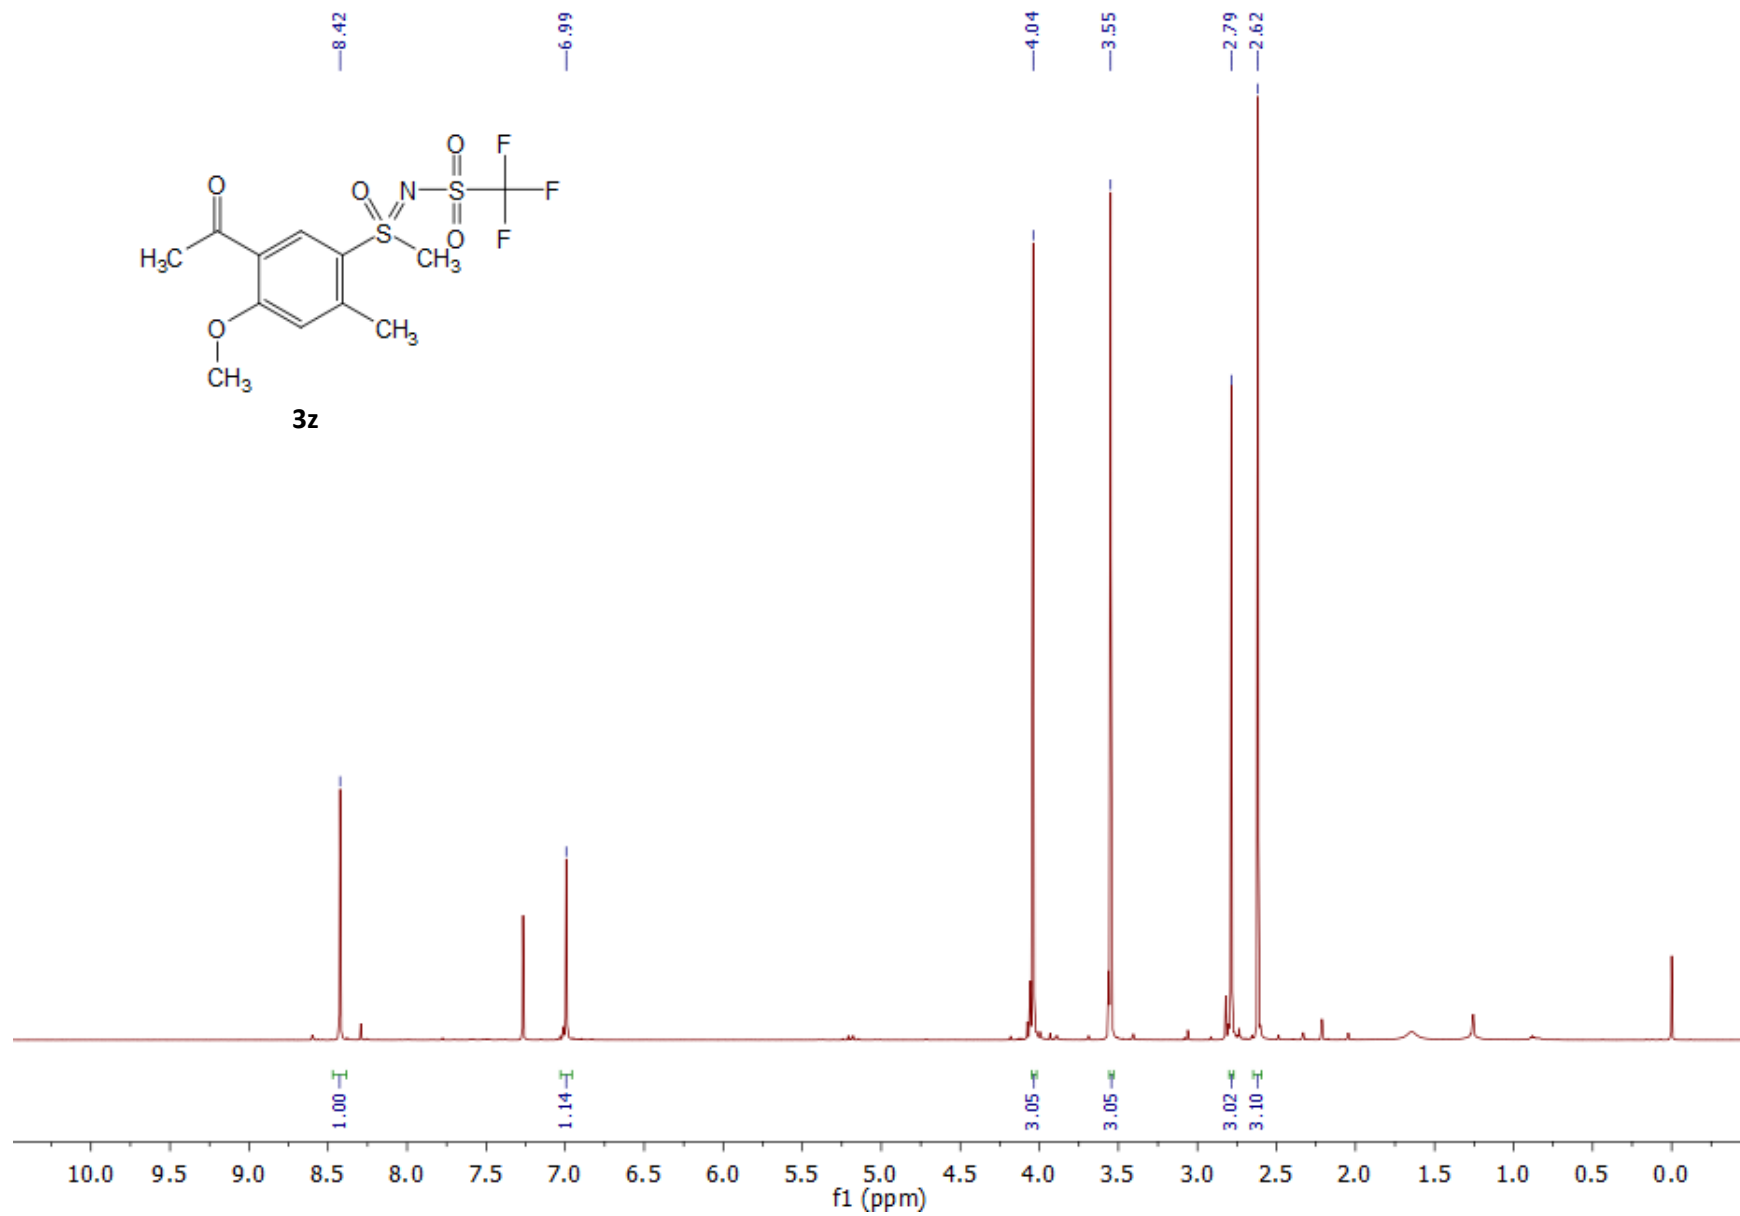

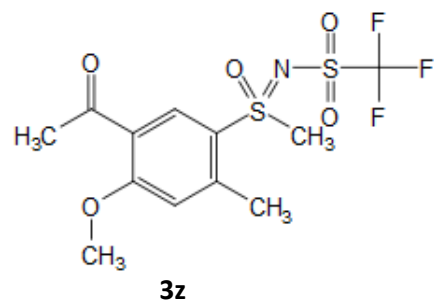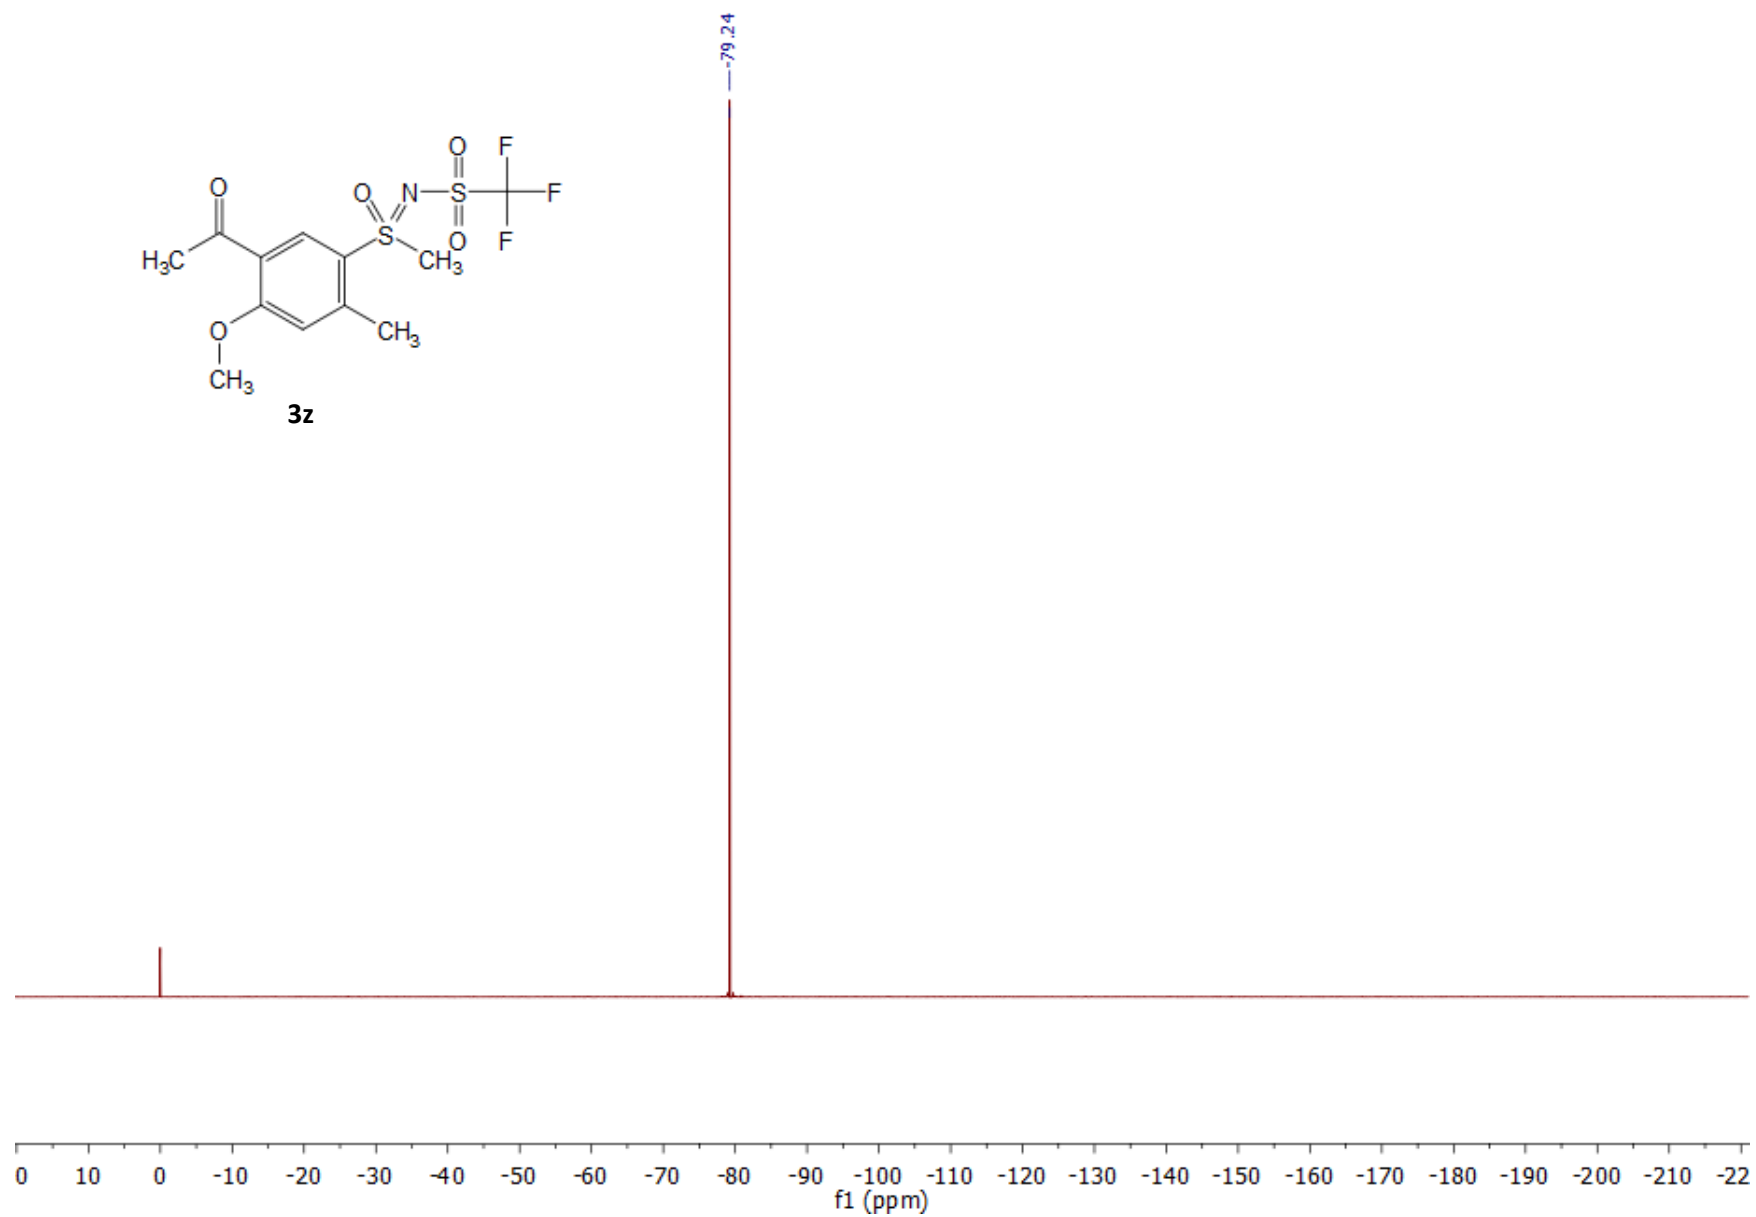

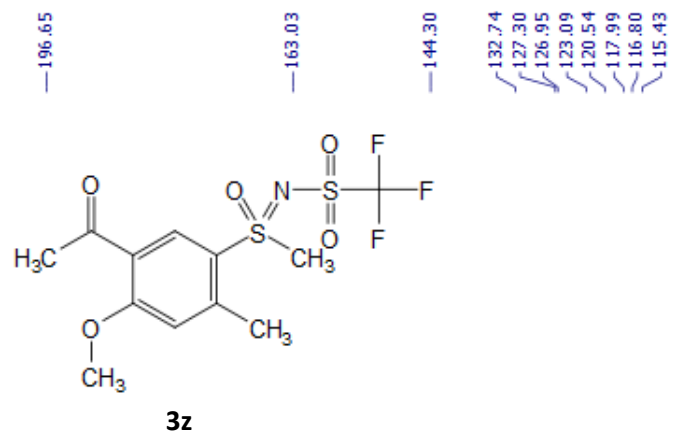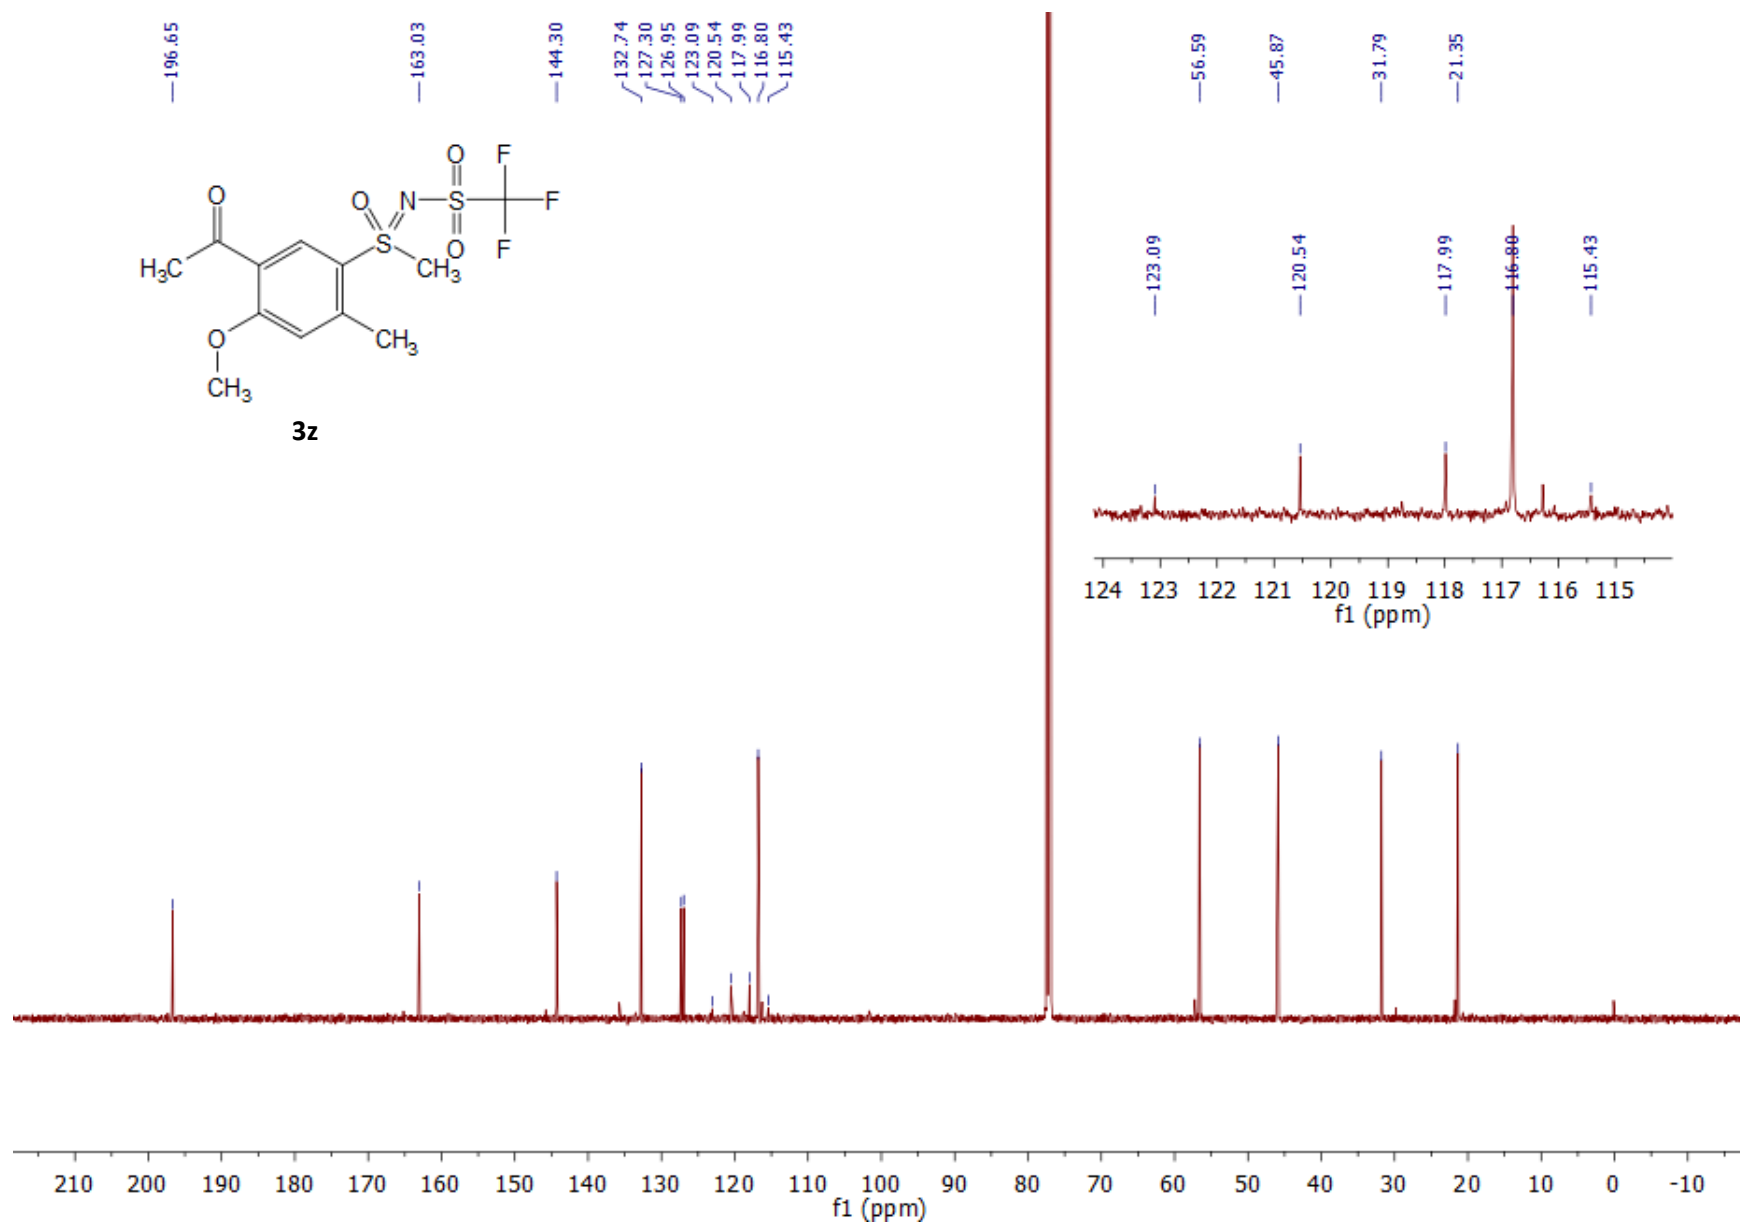

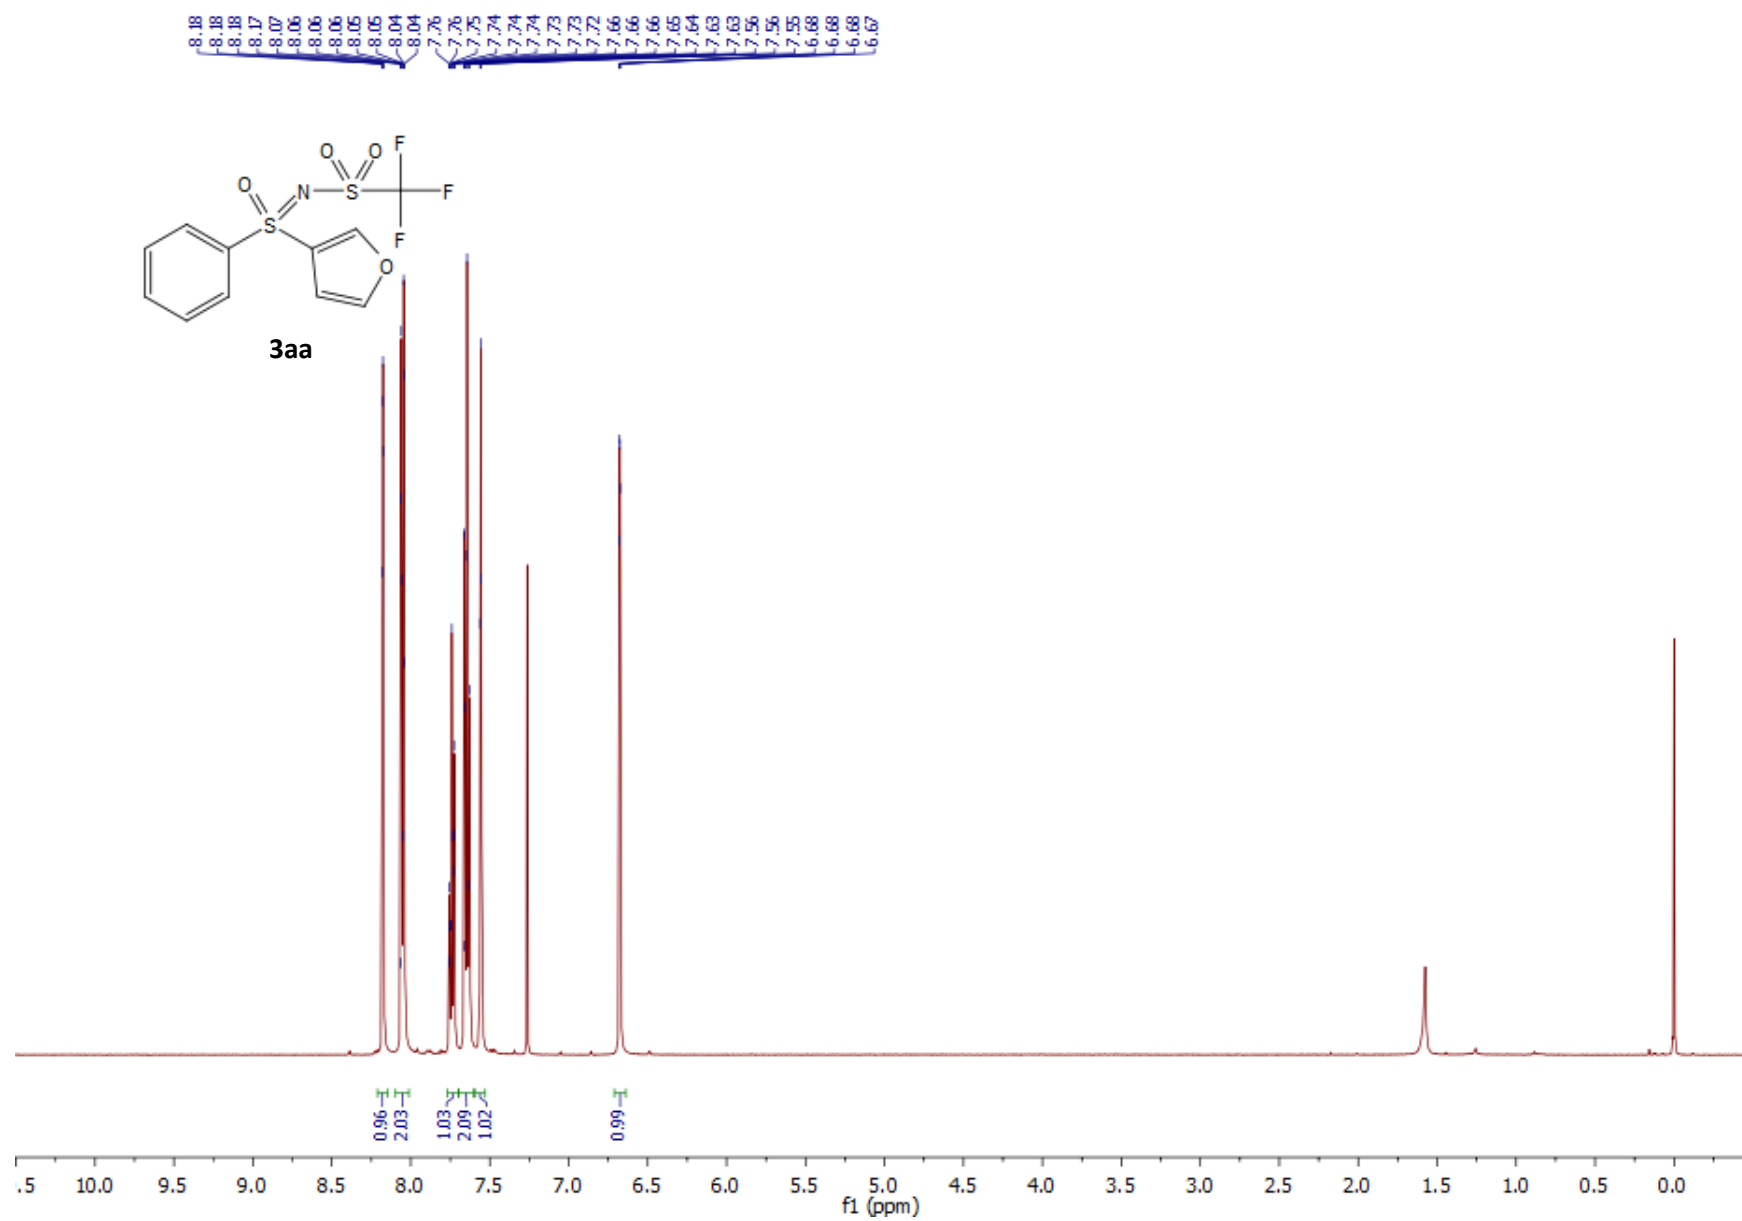

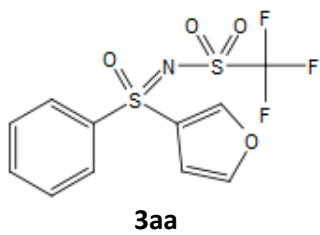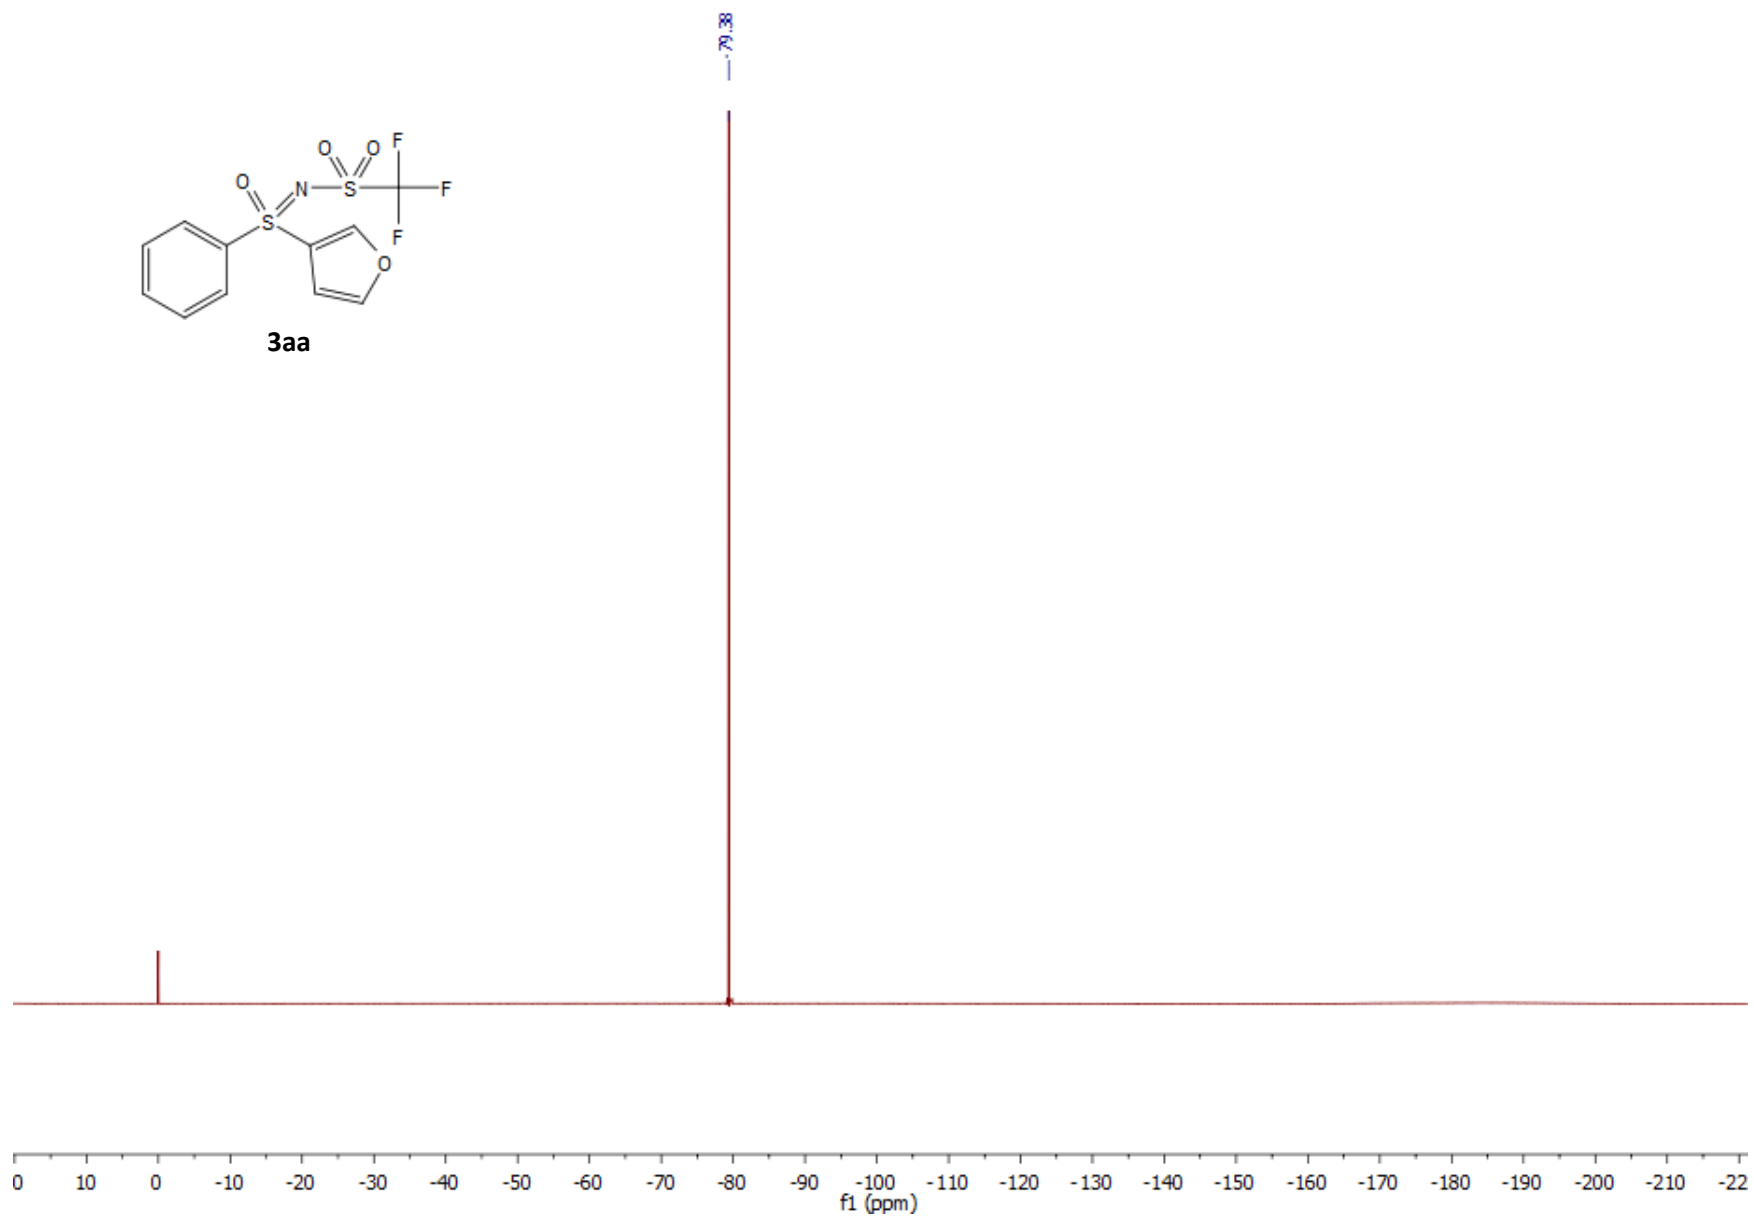

S101

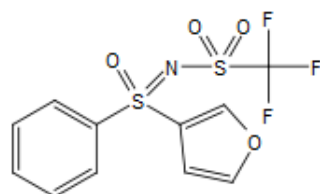

3aa

147.80  
146.25  
138.74  
135.17  
130.16  
127.46  
126.92  
123.07  
120.51  
117.96  
115.41  
108.46

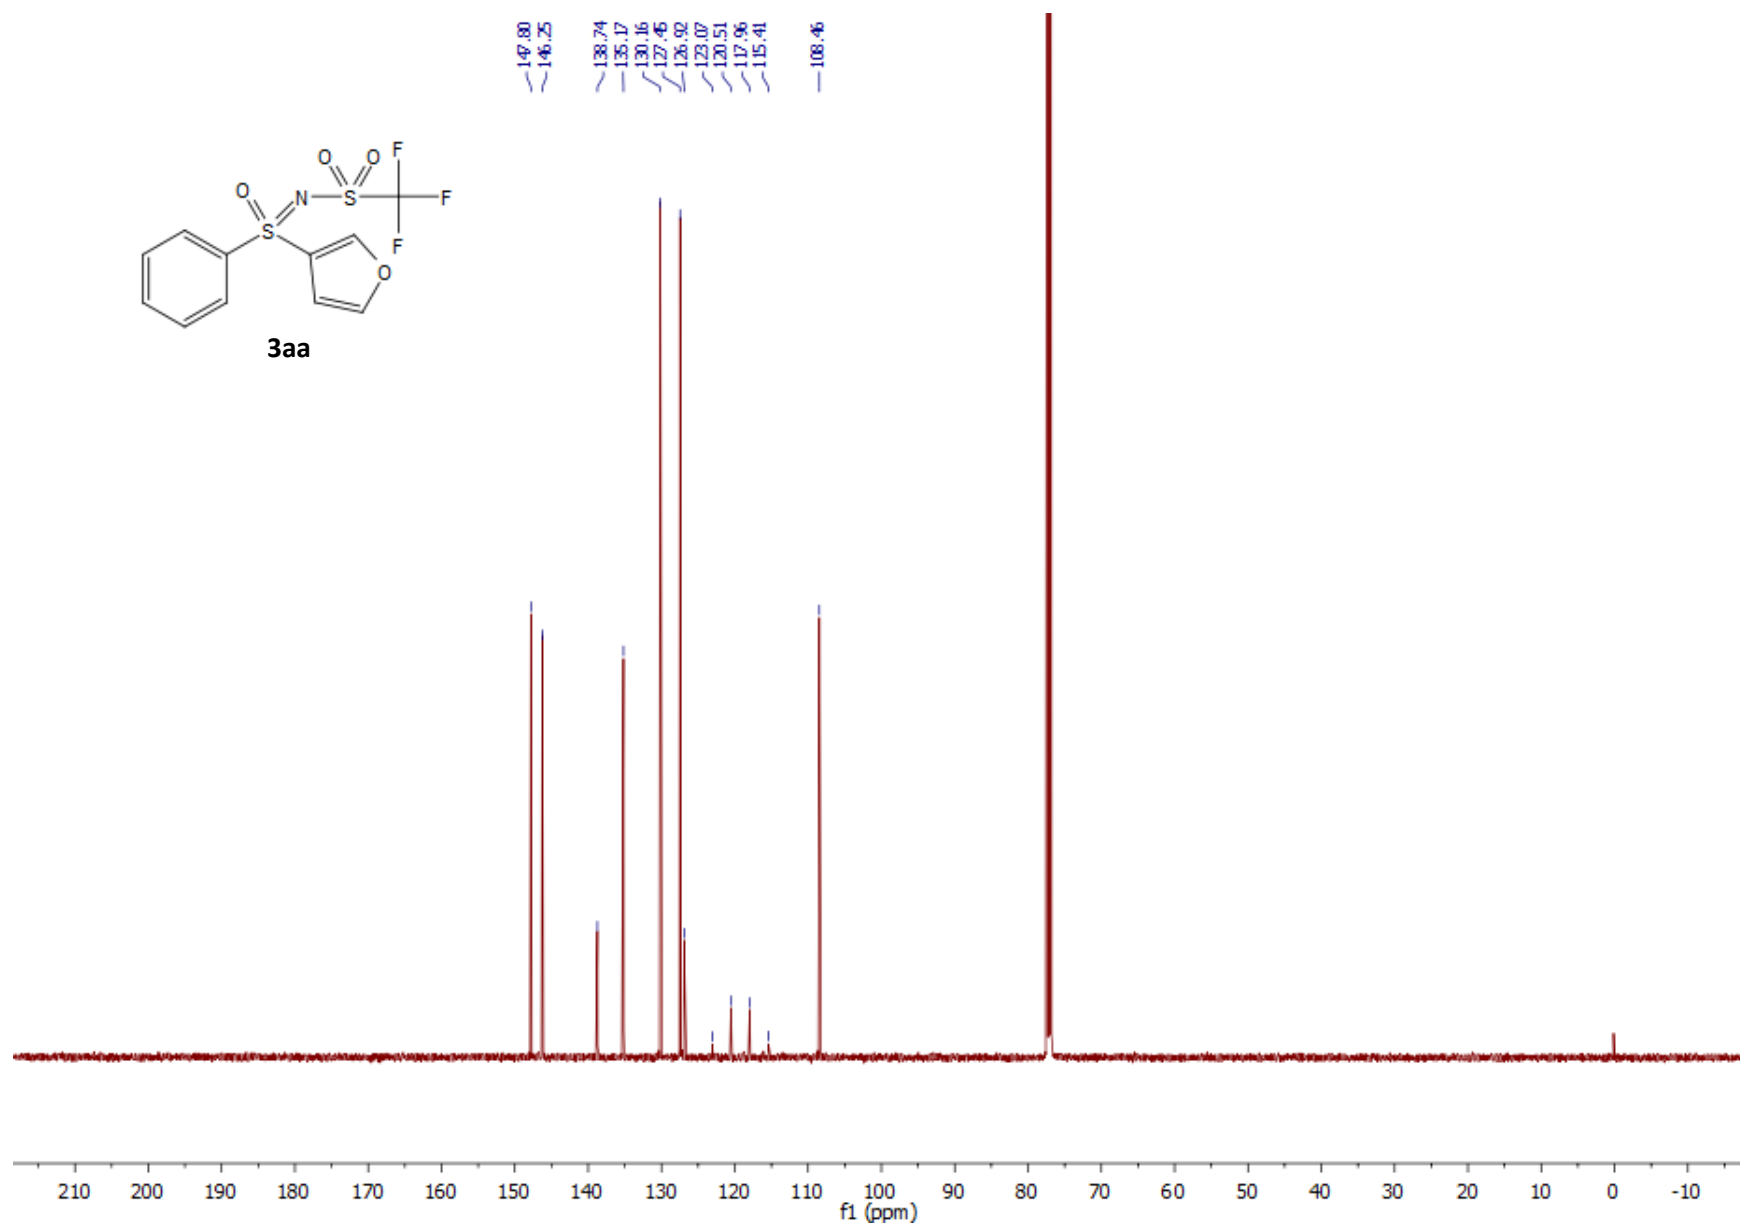

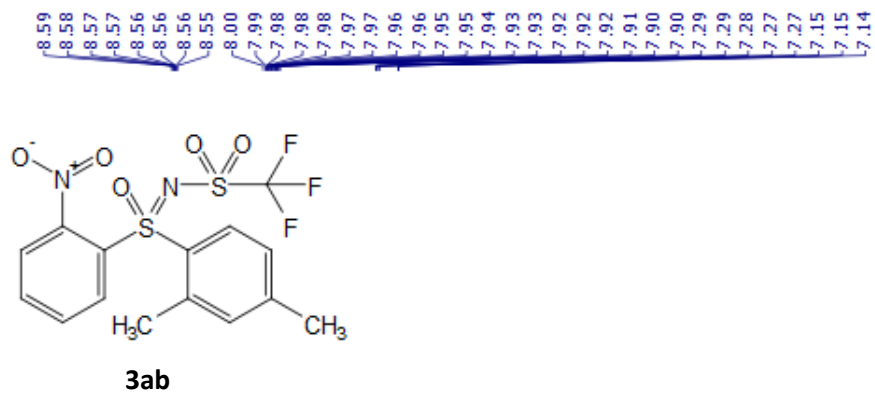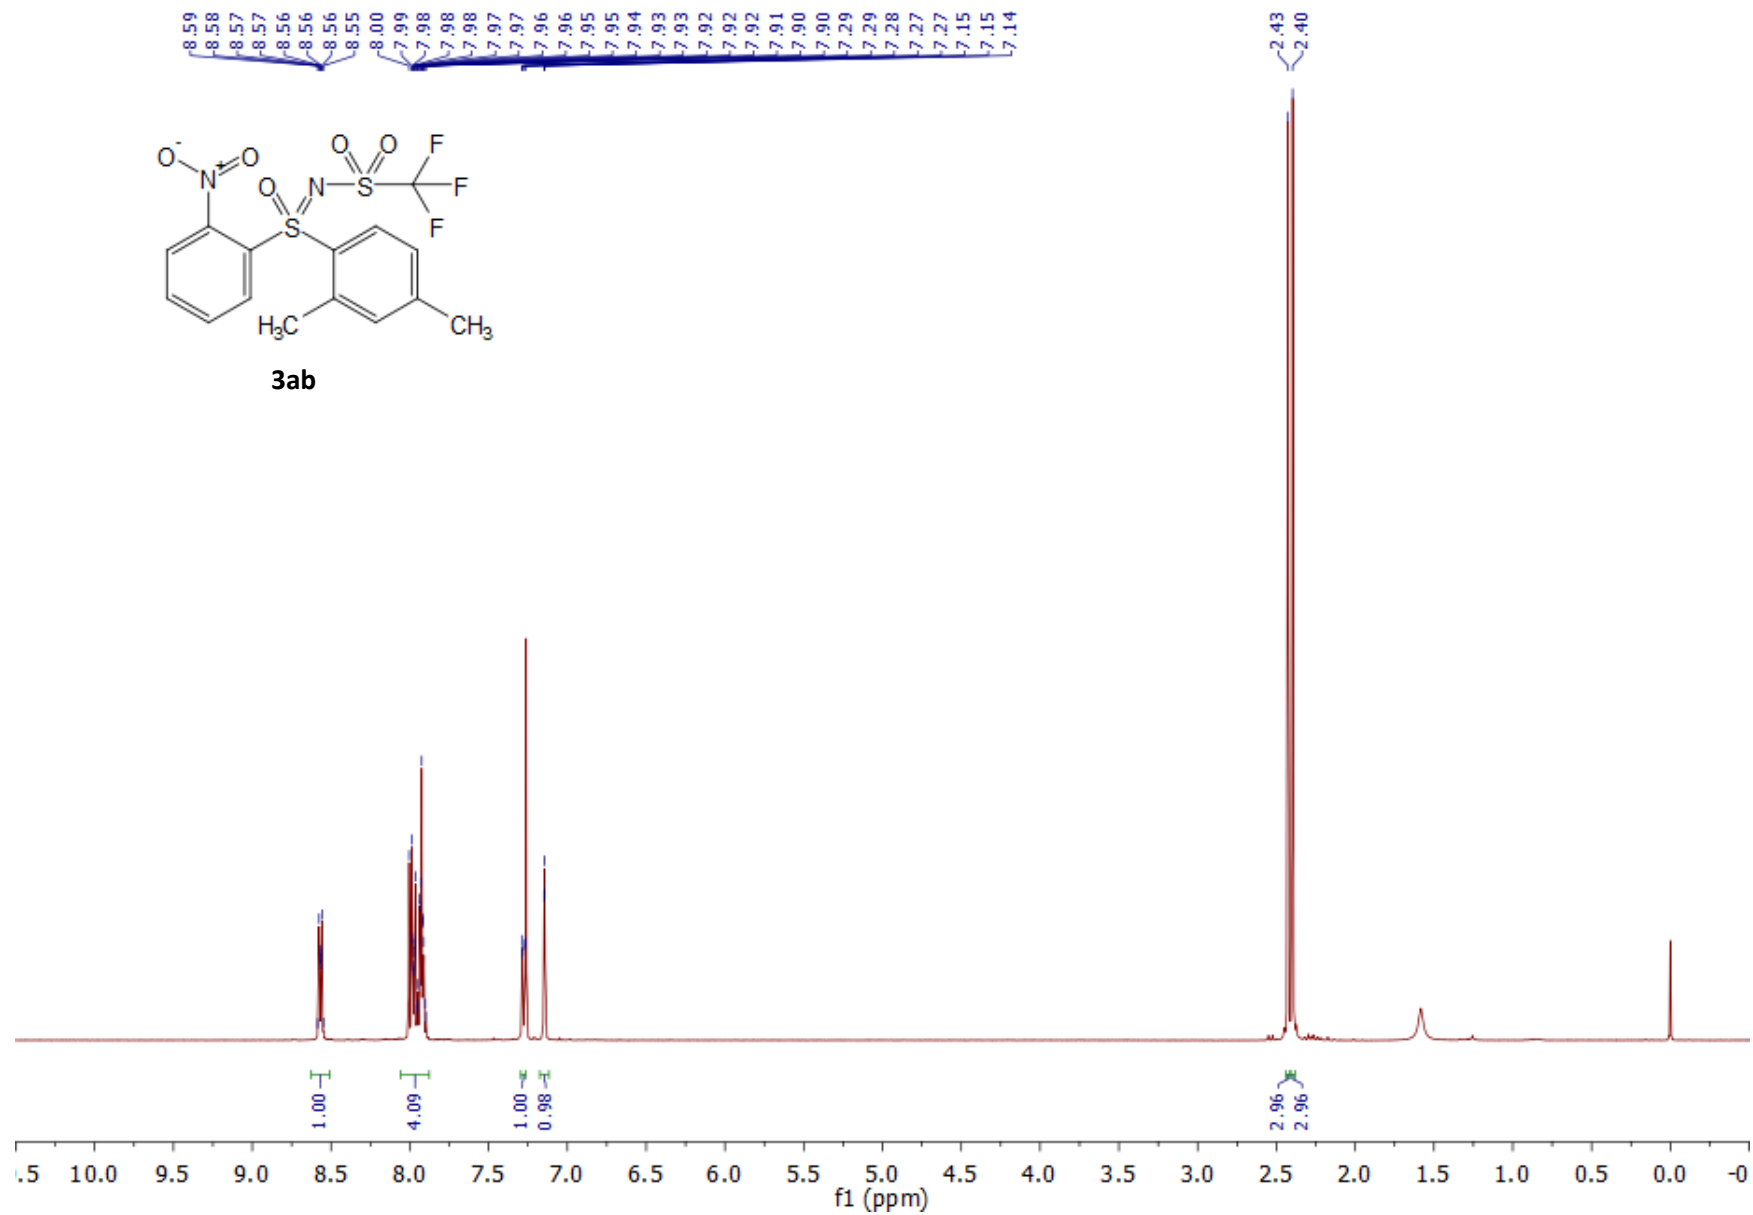

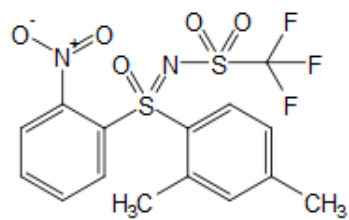

**3ab**

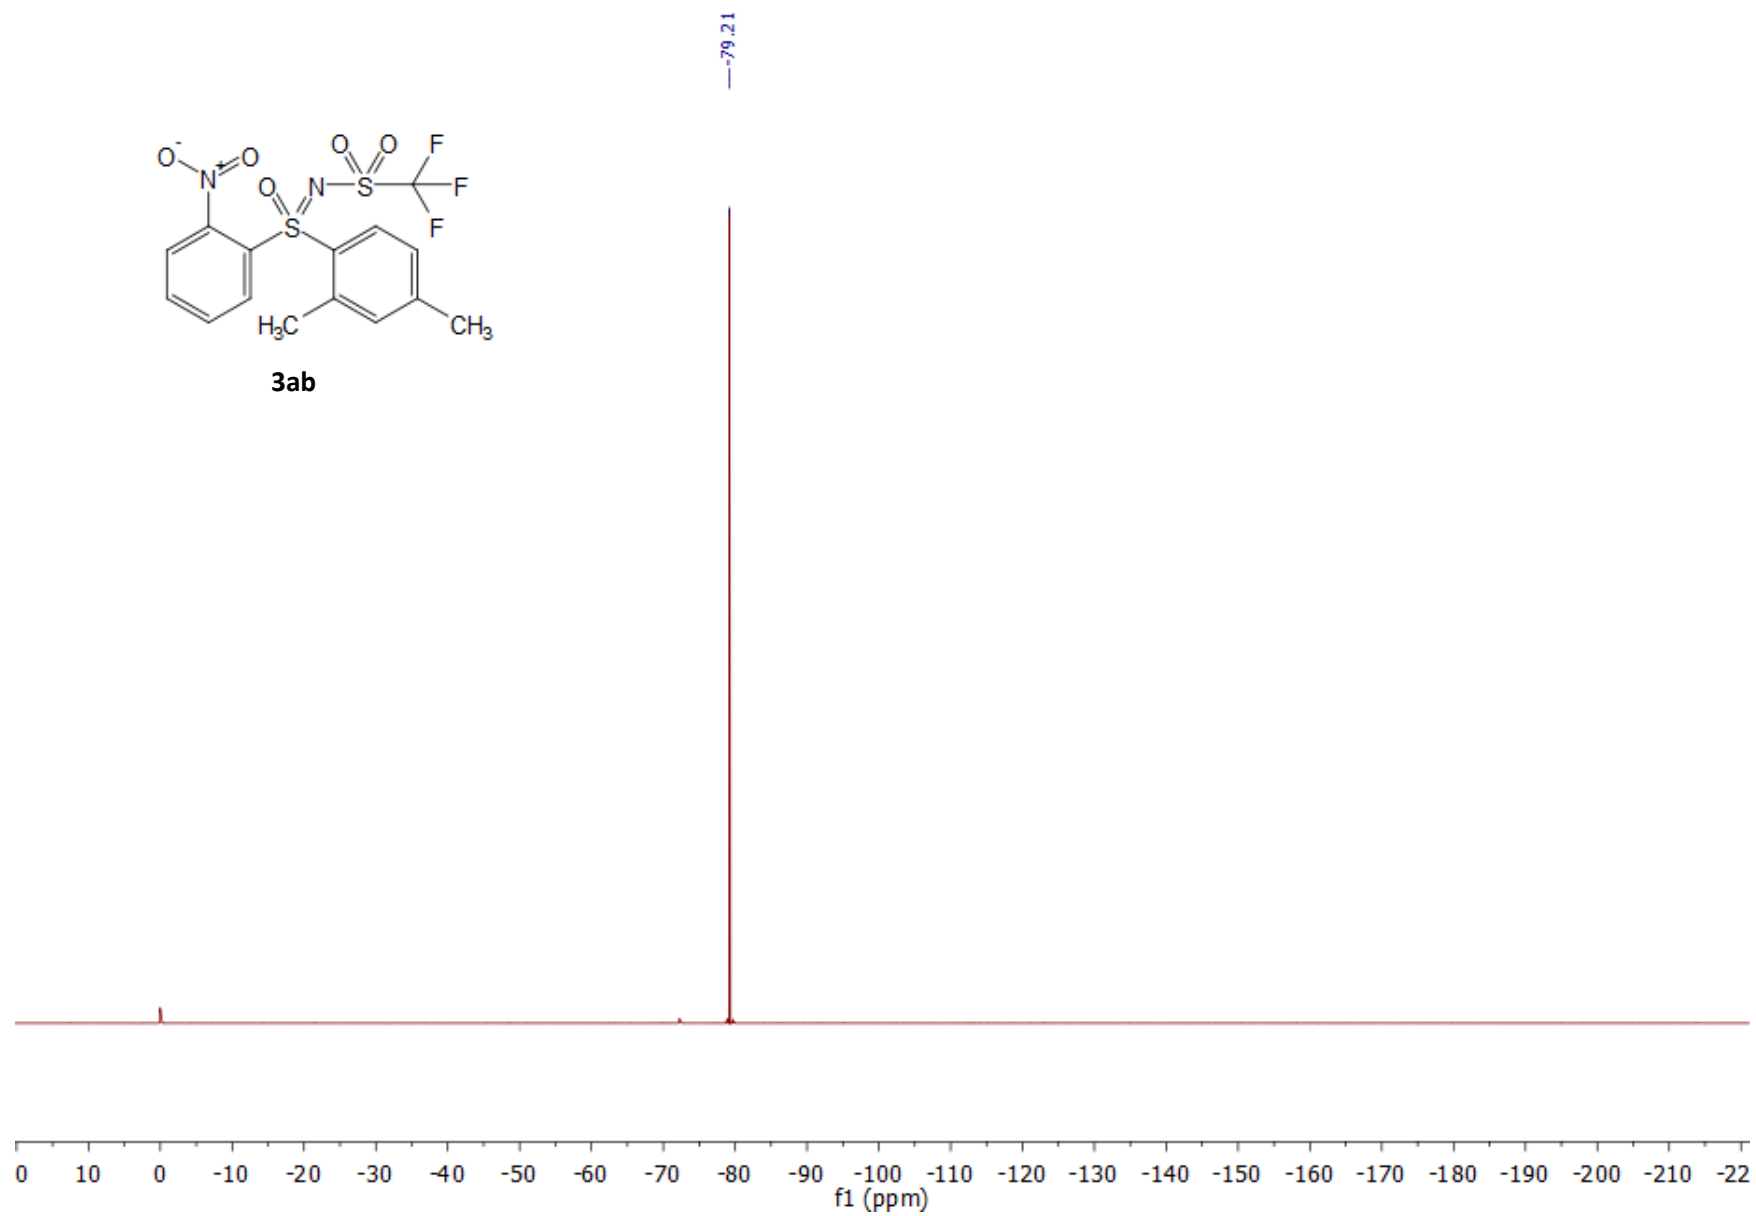





3ab

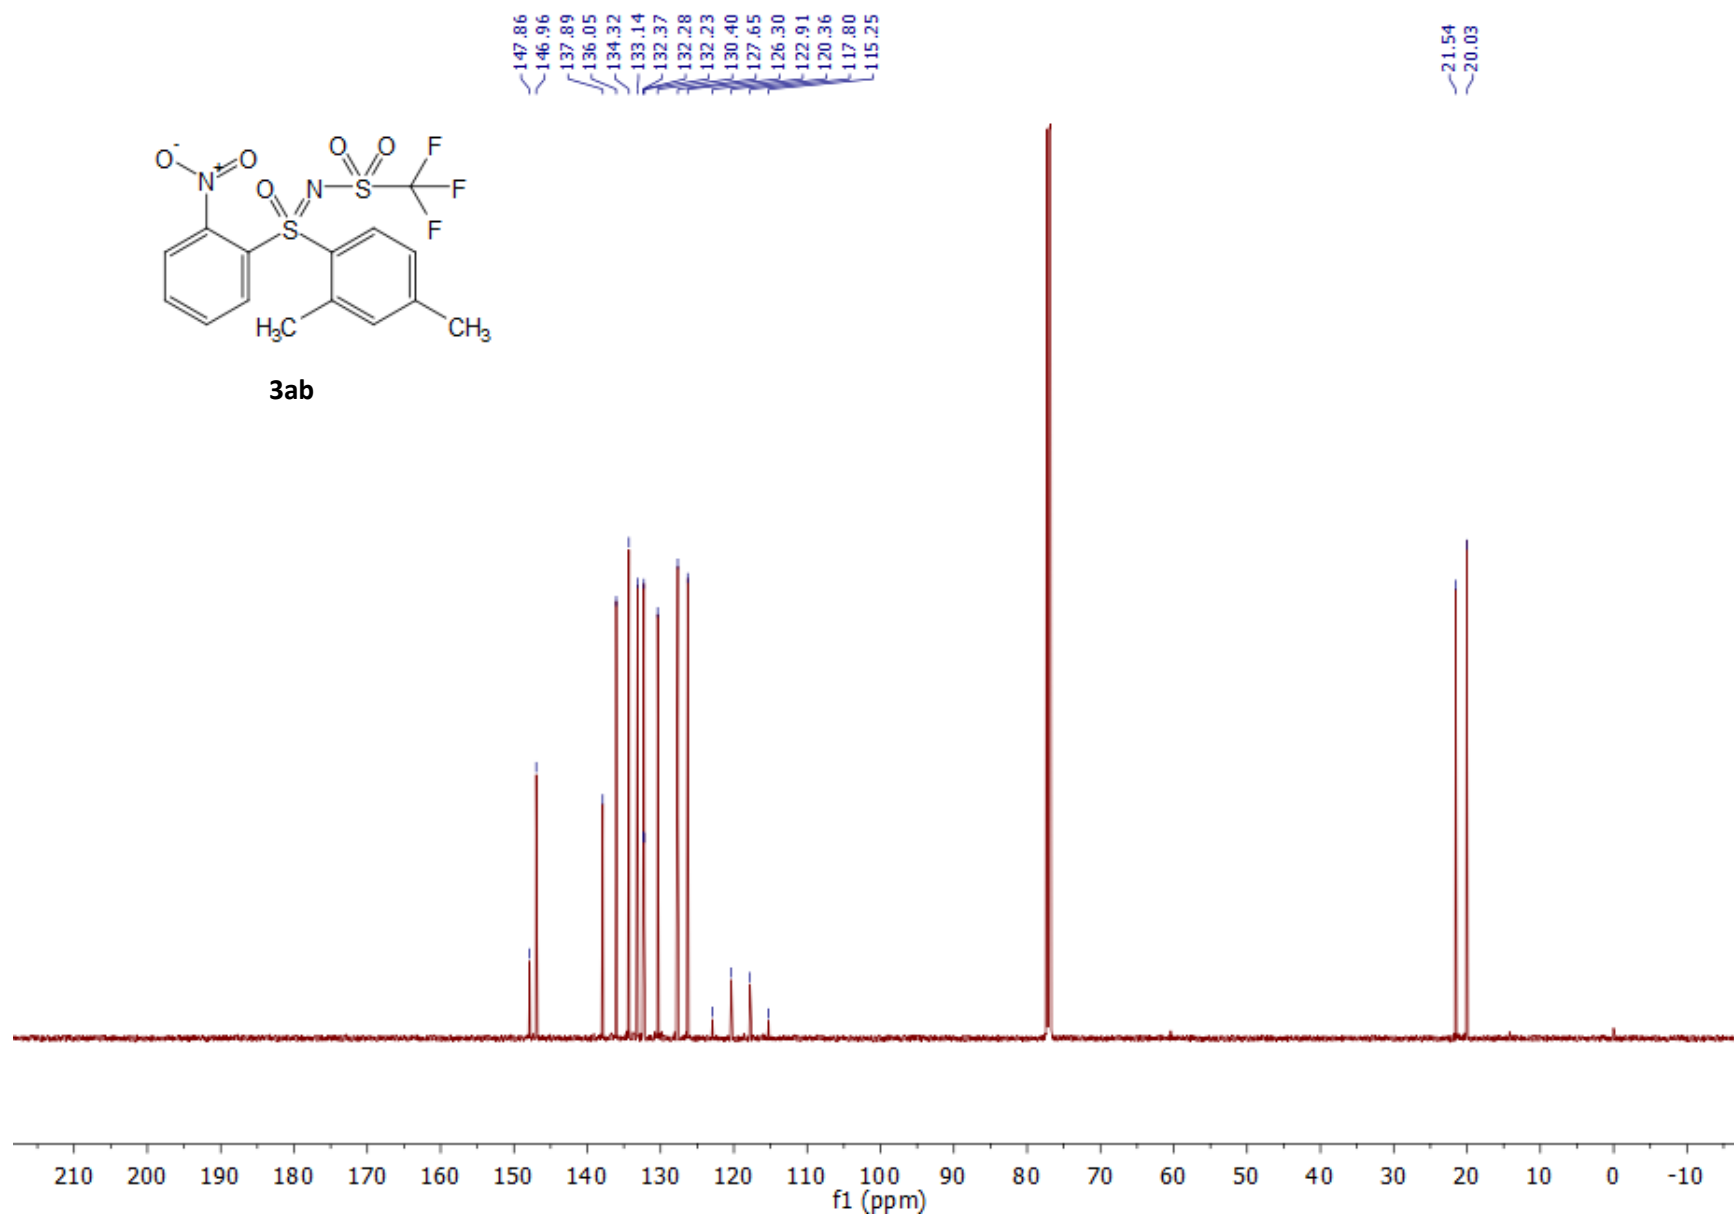

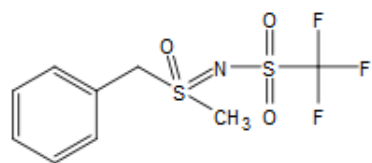

3ac

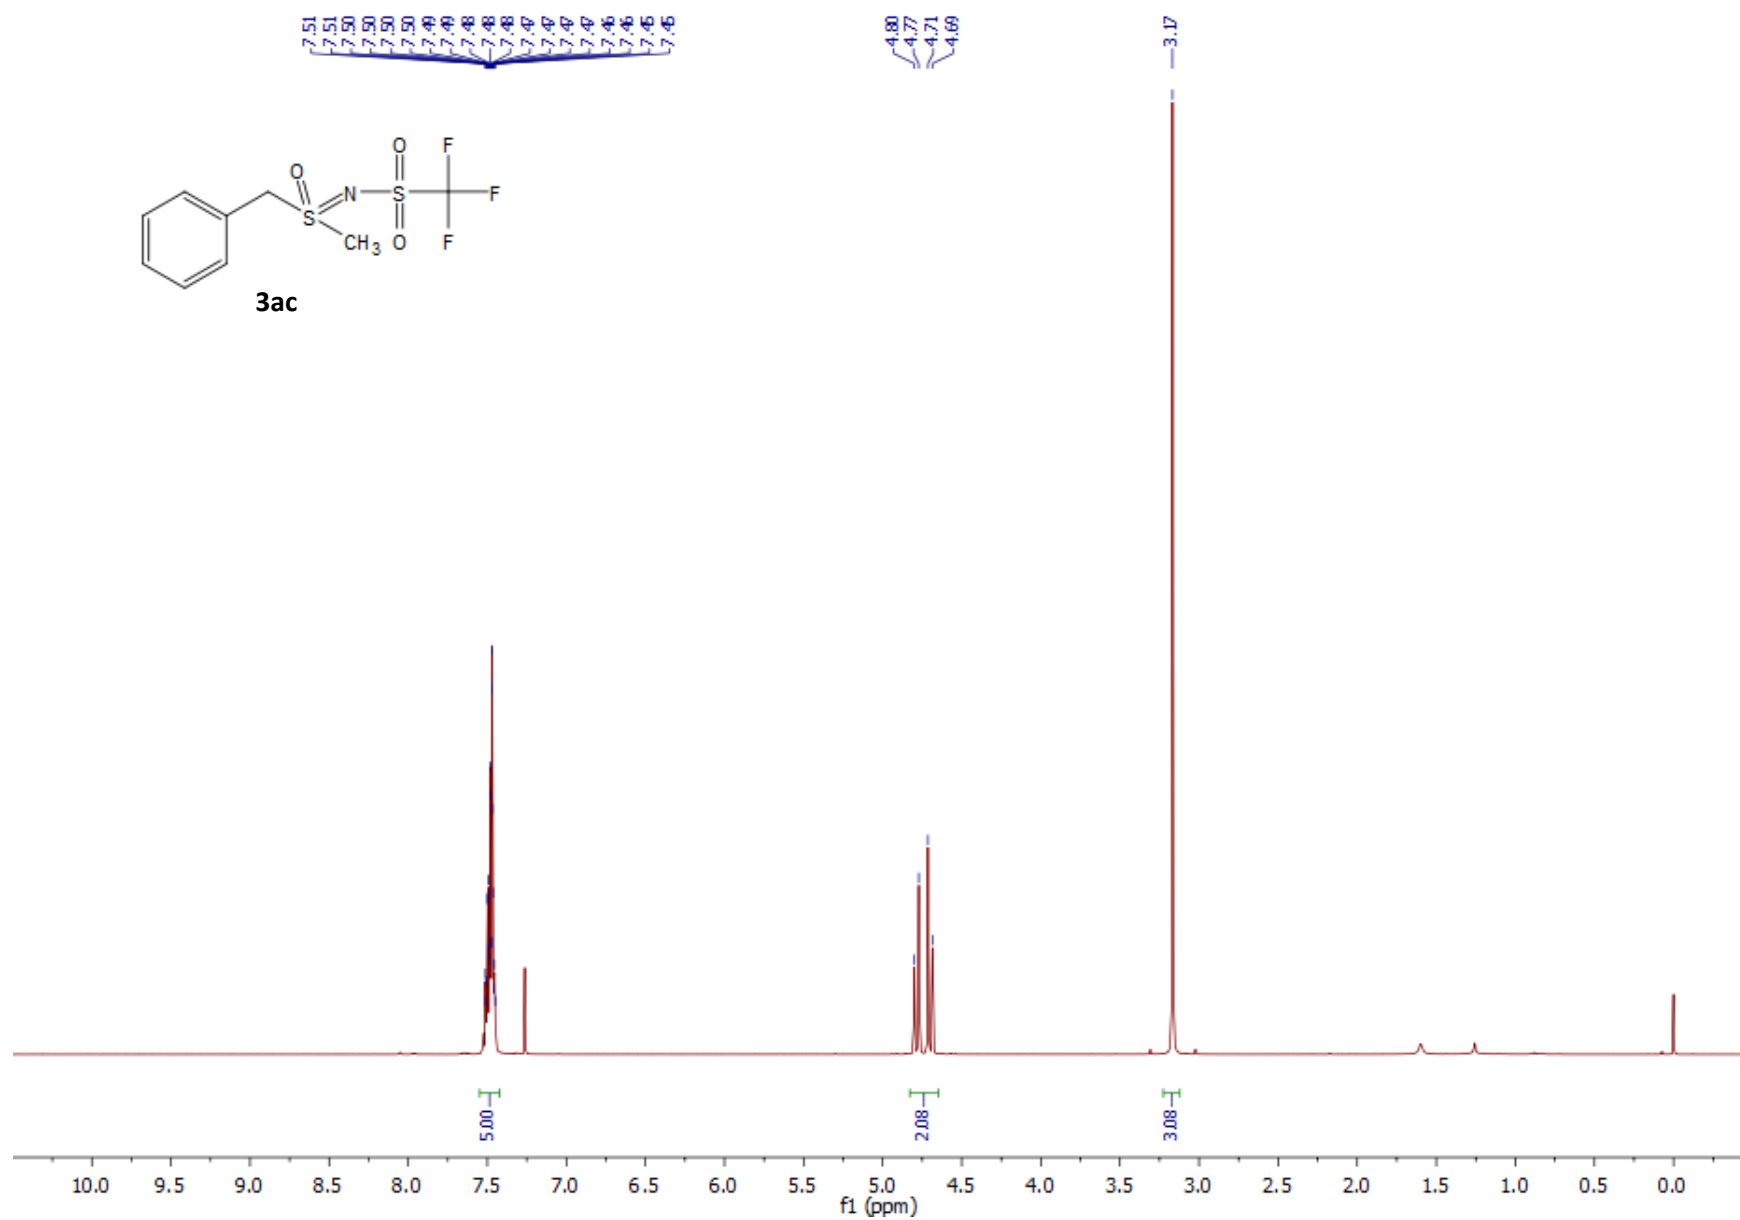

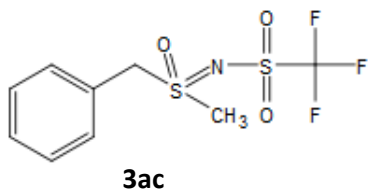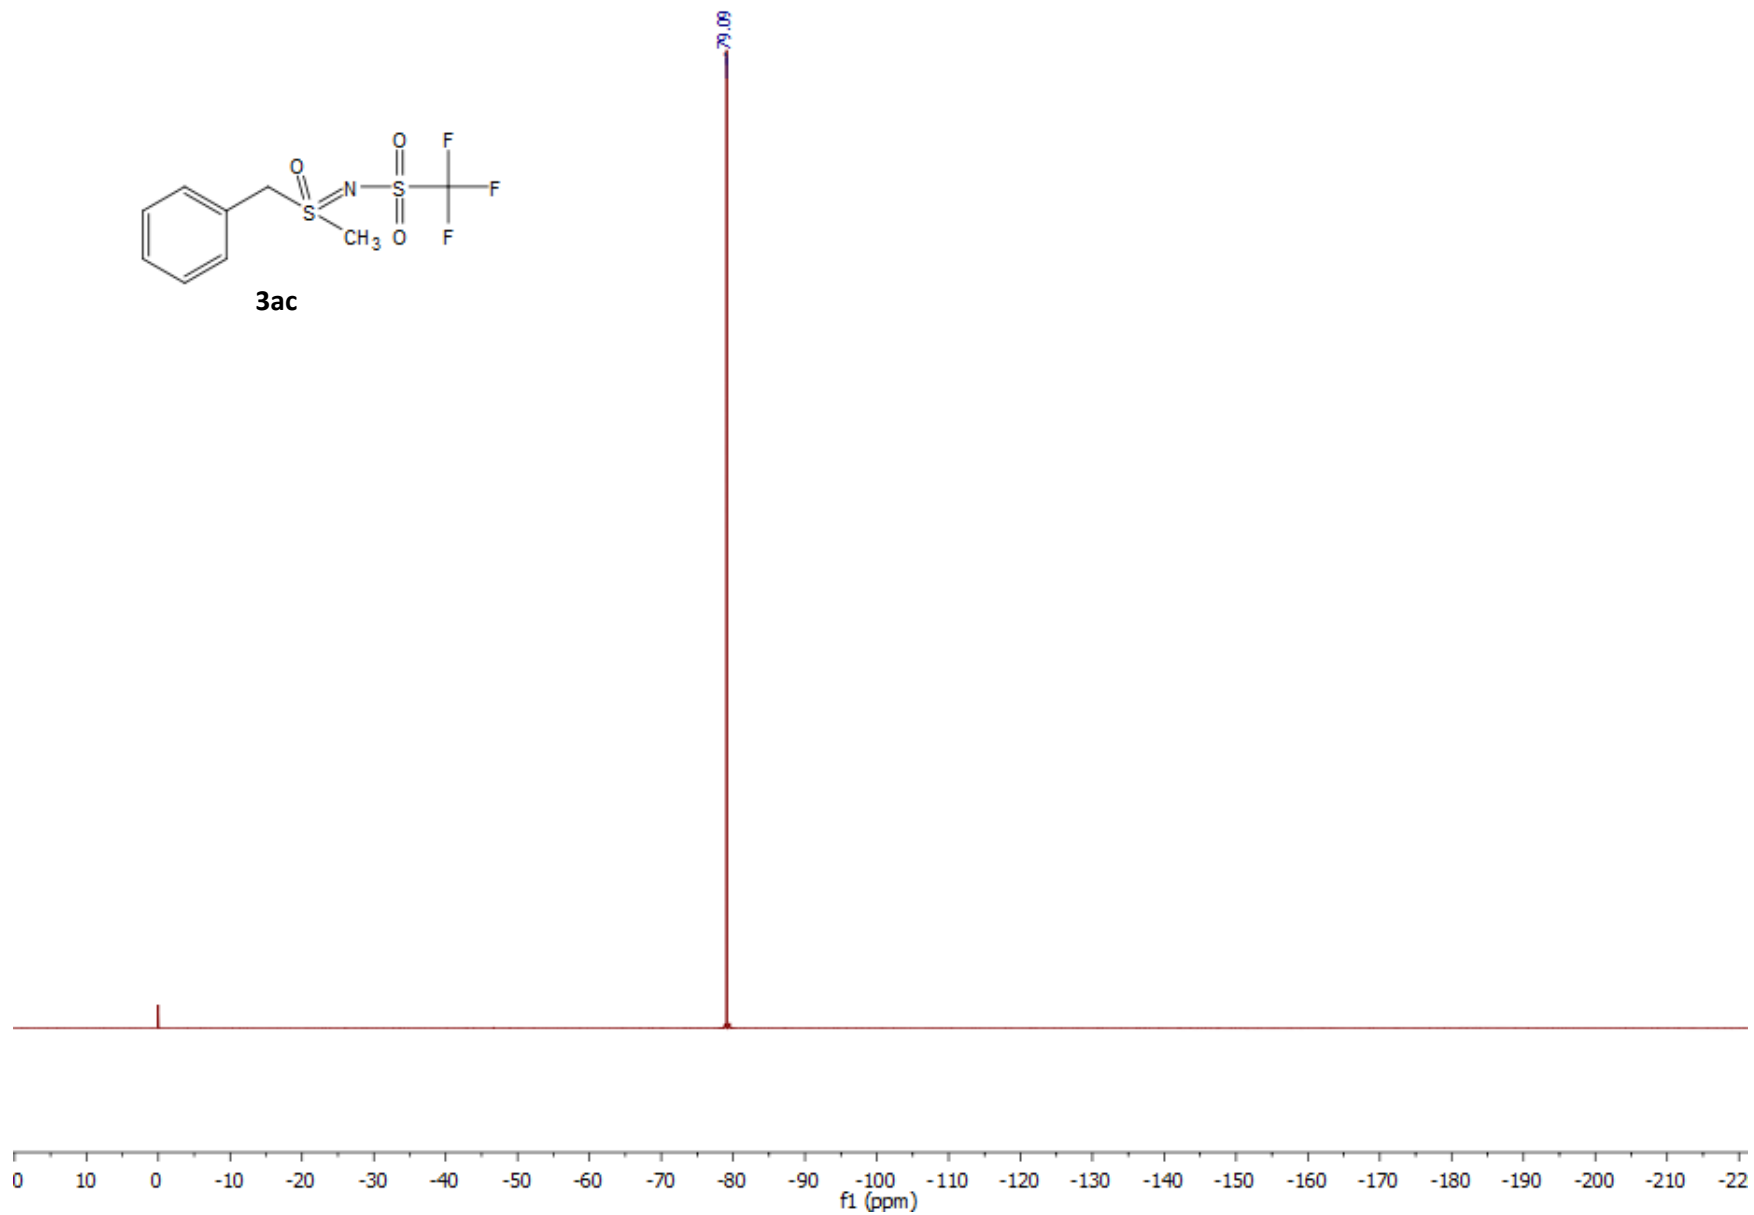

S107

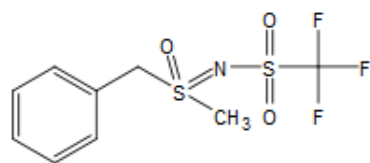

**3ac**

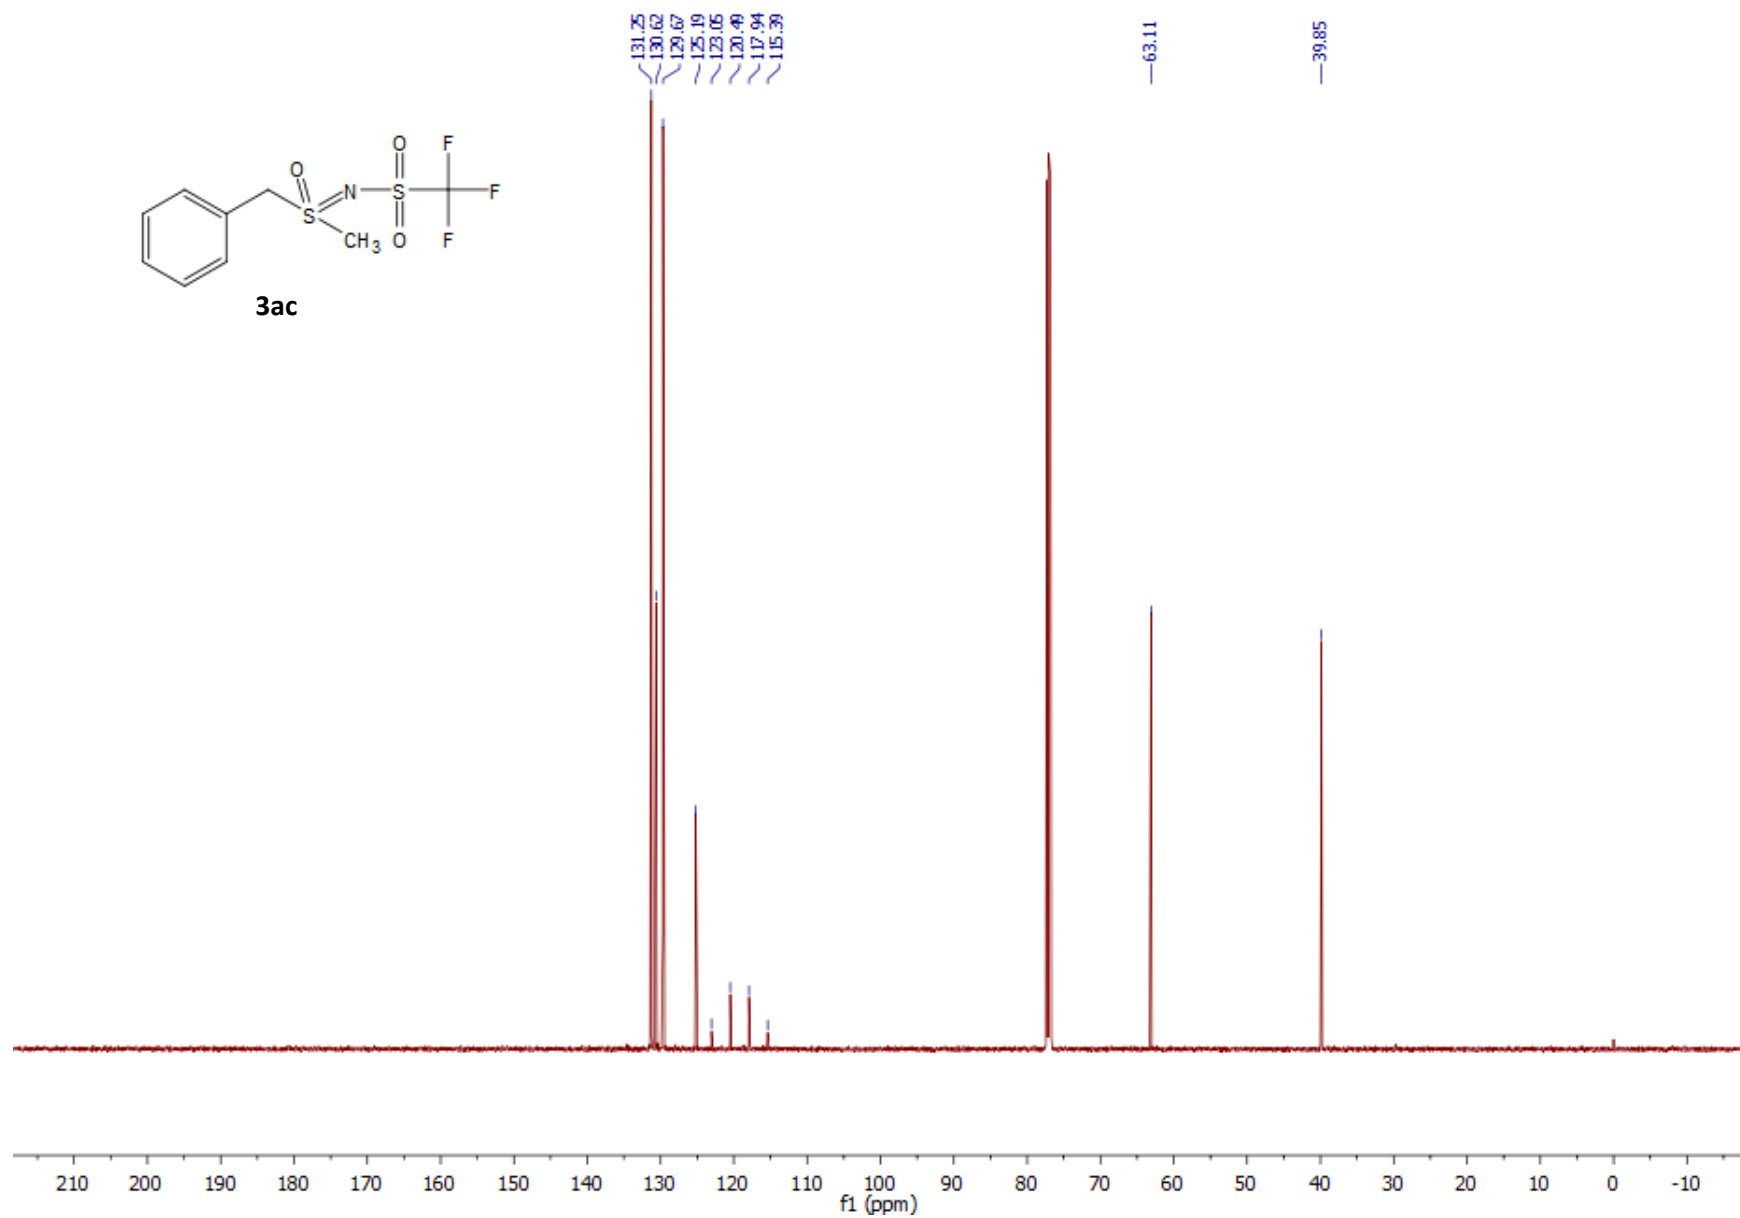

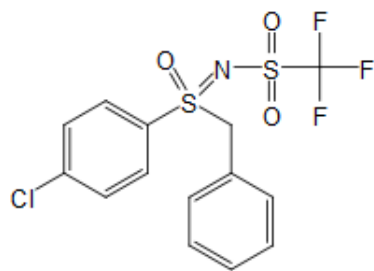

3ad

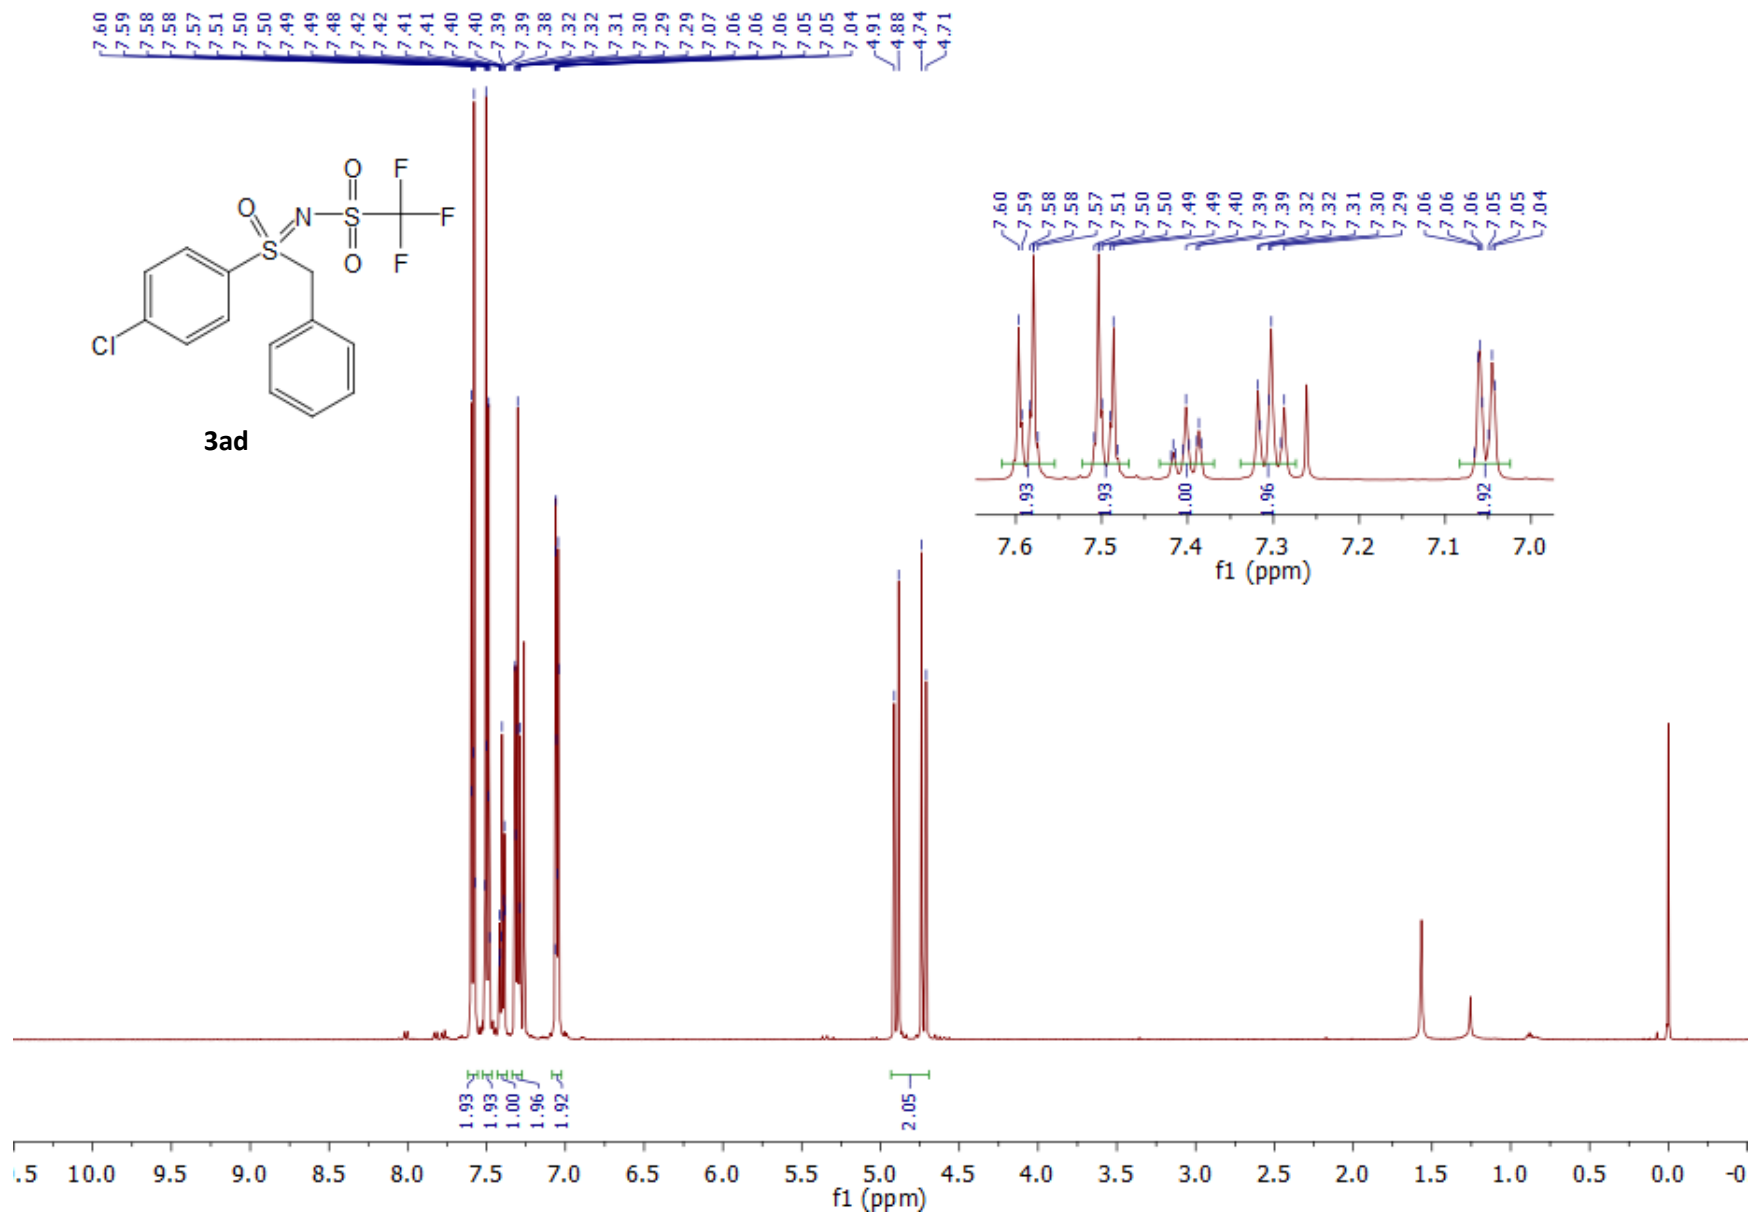

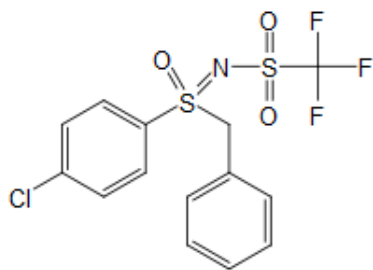

**3ad**

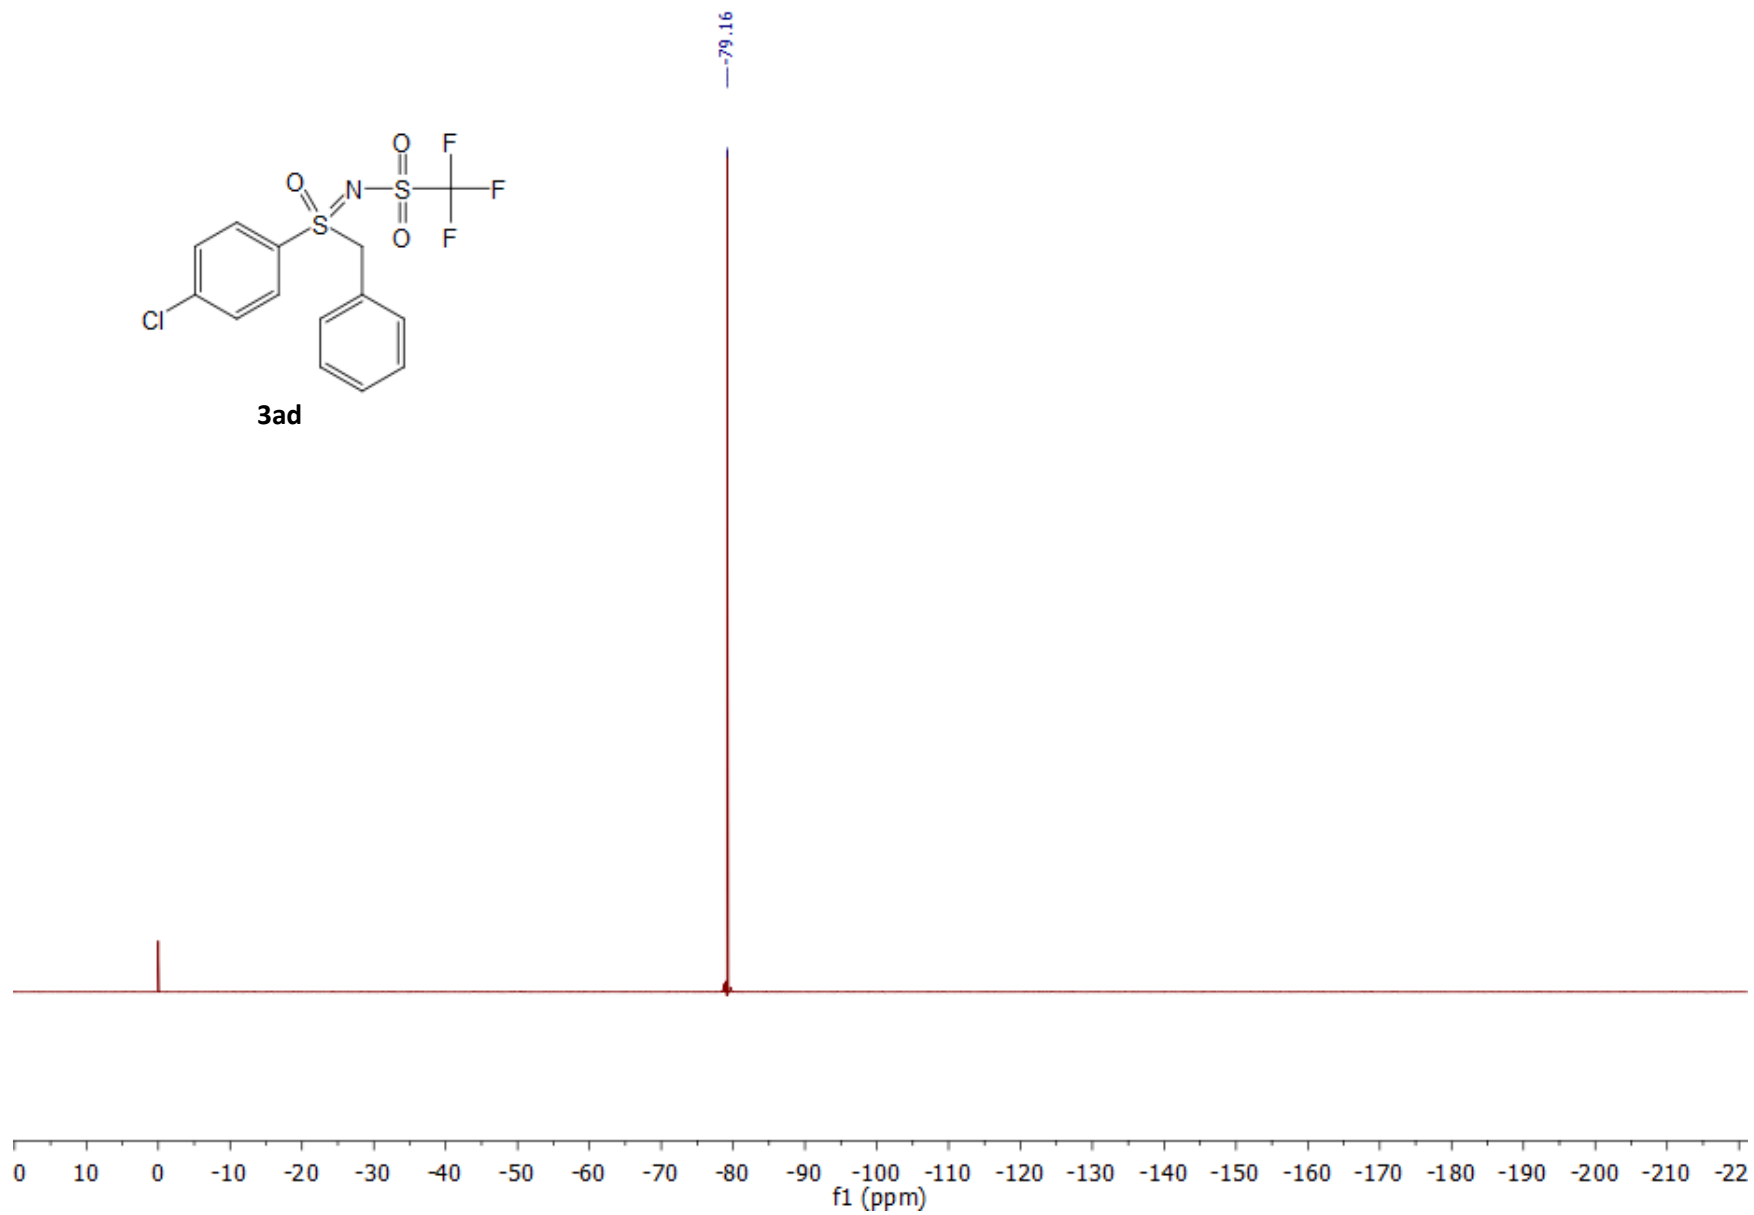

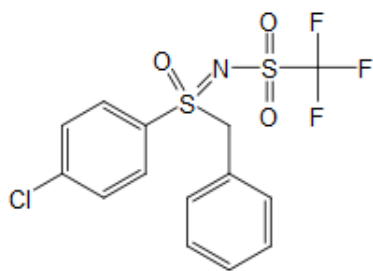

3ad

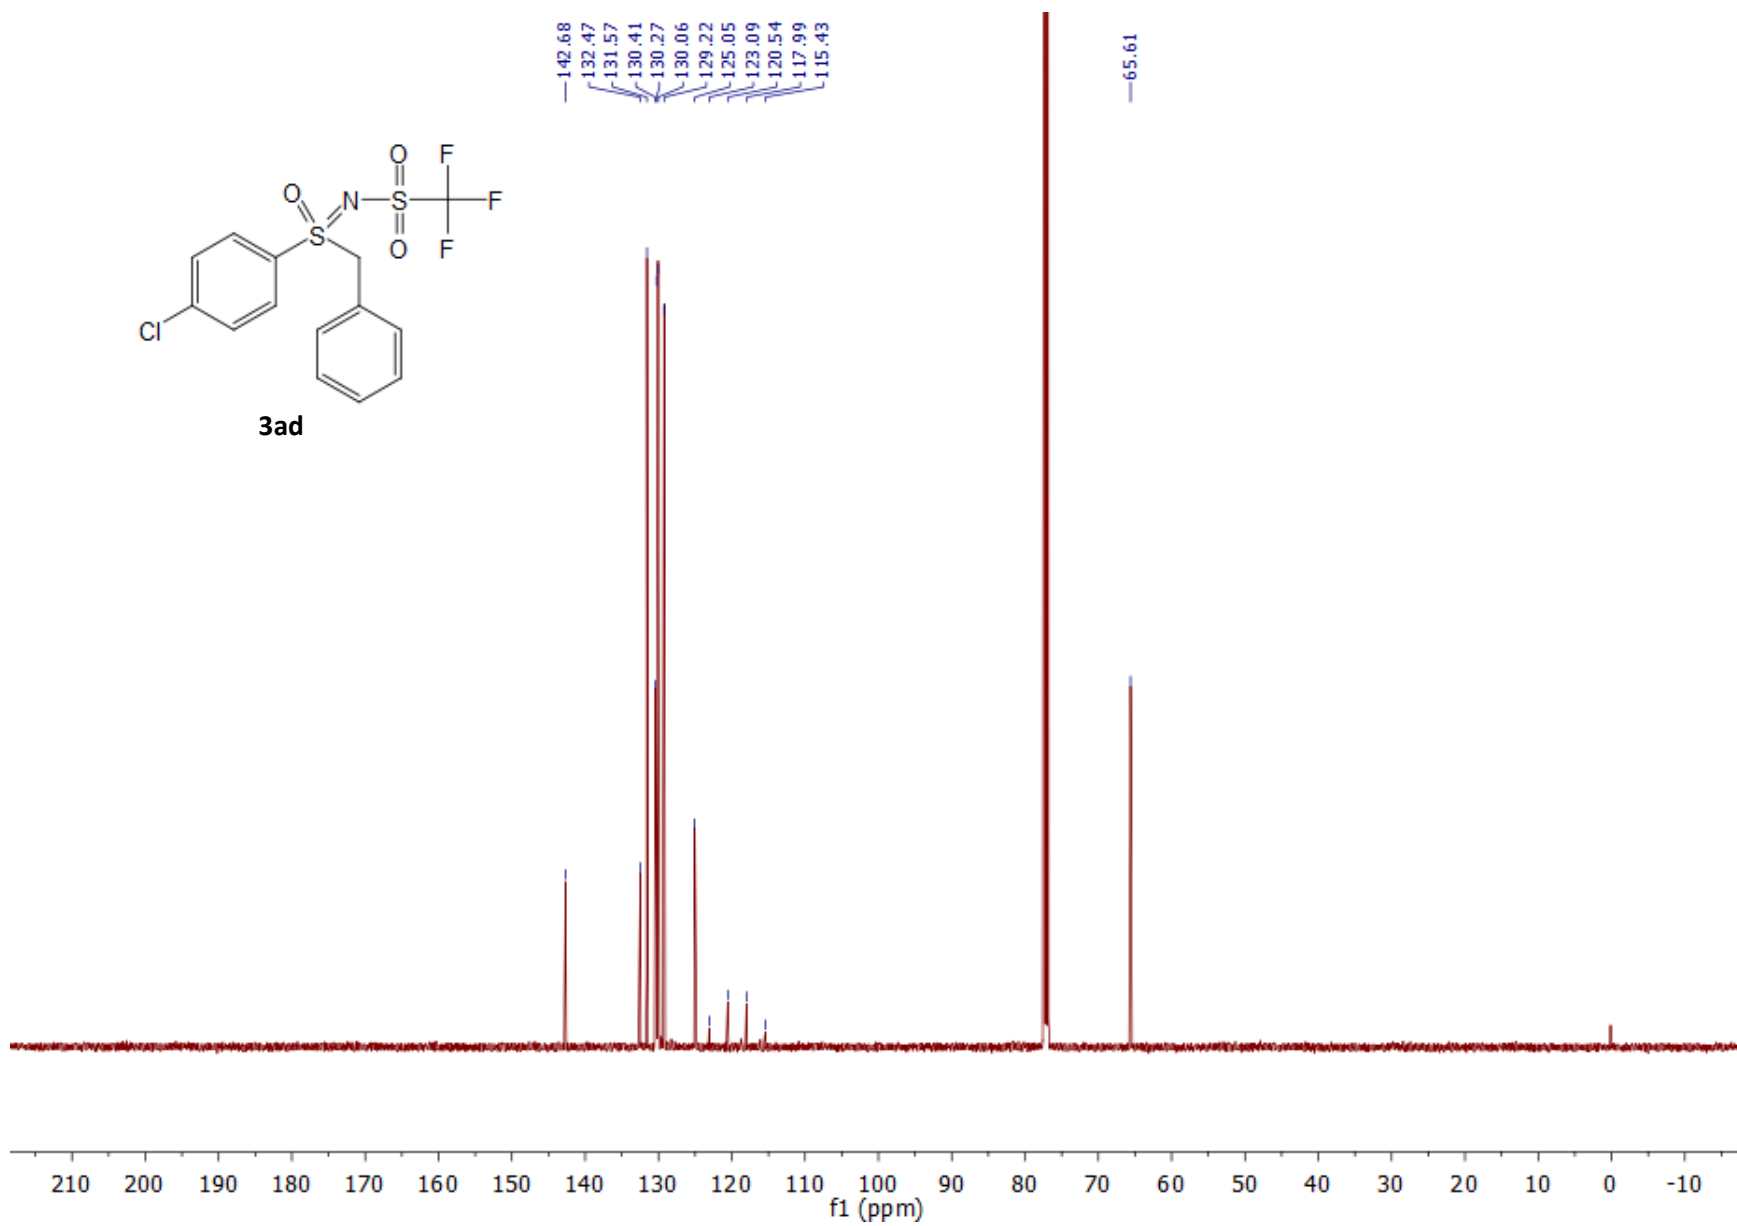

8.27  
8.26  
8.25  
8.25  
8.07  
8.07  
8.06  
8.05  
8.05  
7.73  
7.73  
7.72  
7.71  
7.71  
7.70  
7.70  
7.69  
7.69  
7.68  
7.68  
7.68  
7.66  
7.66

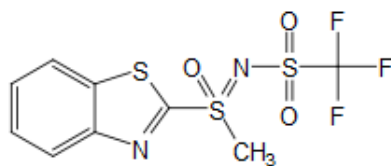

**3ae**

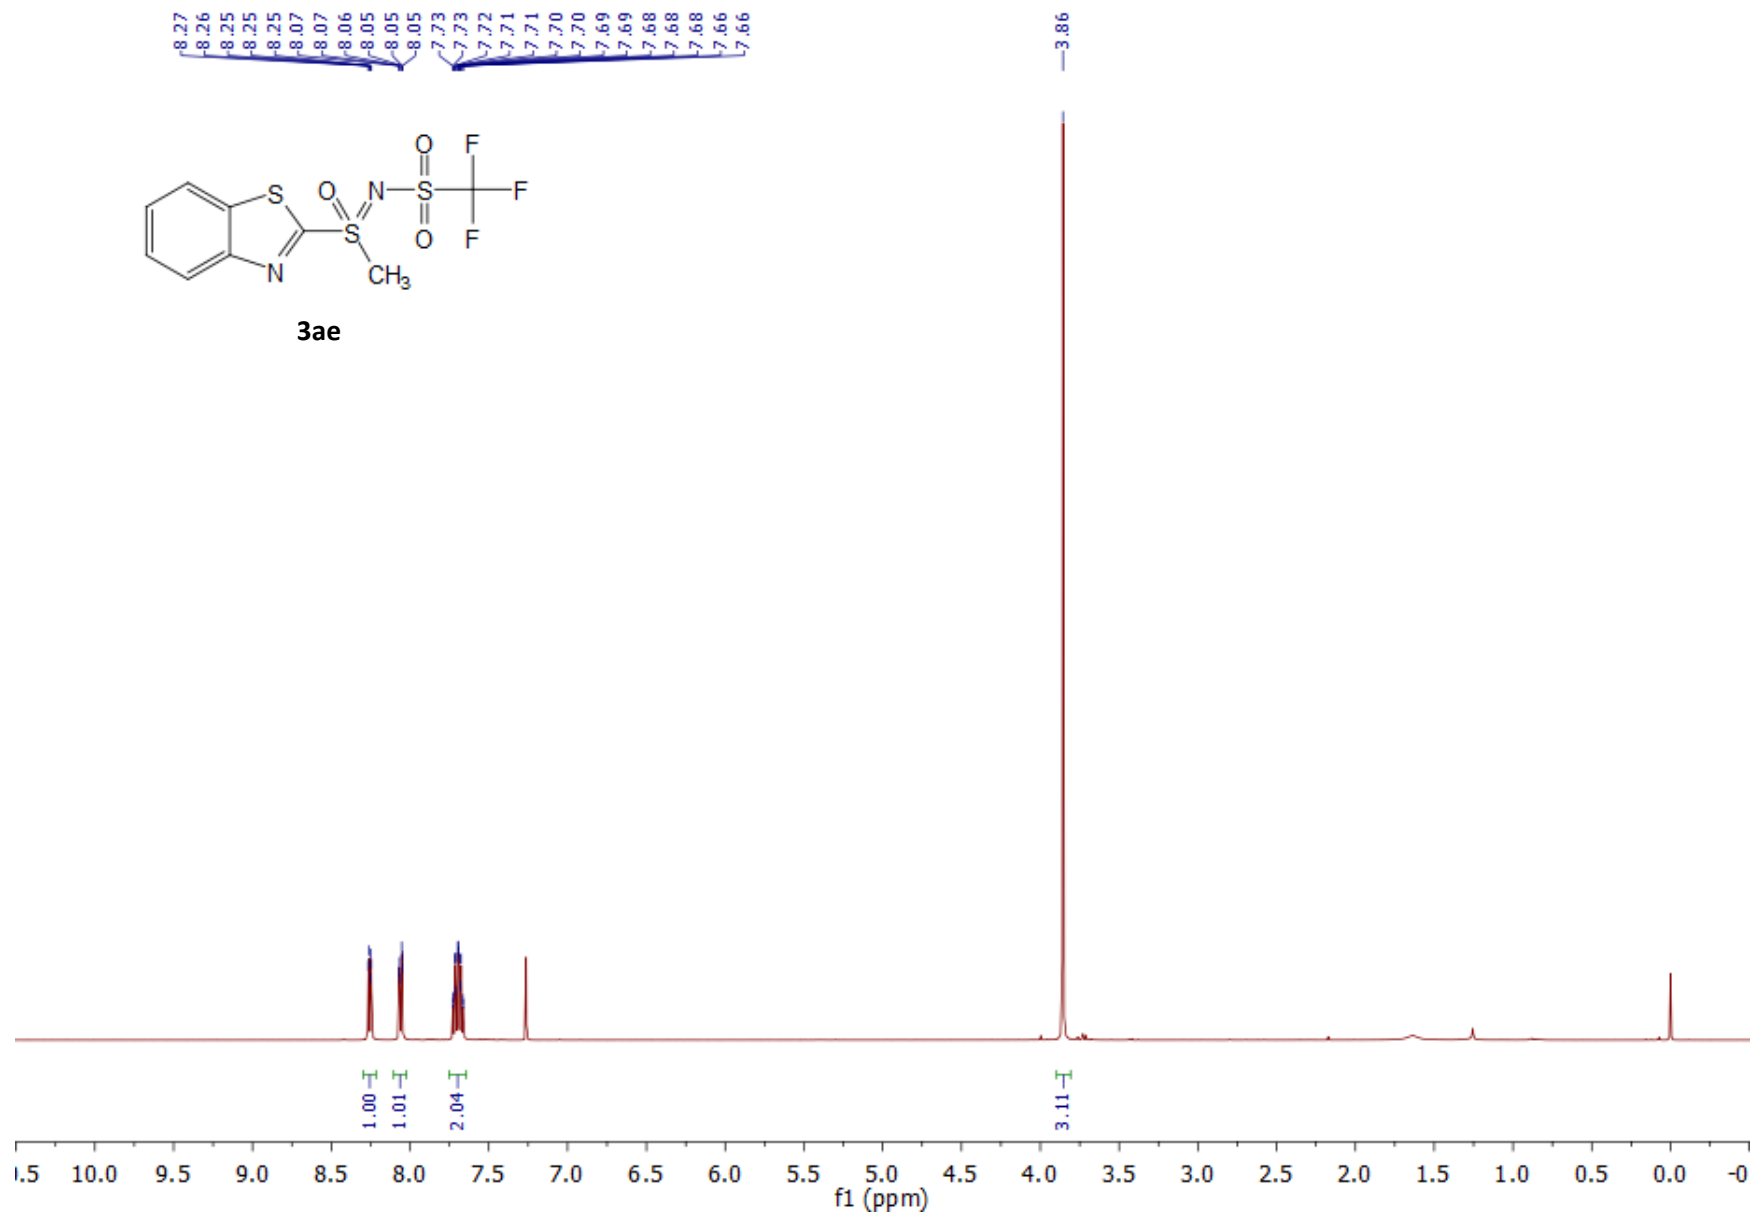





**3ae**

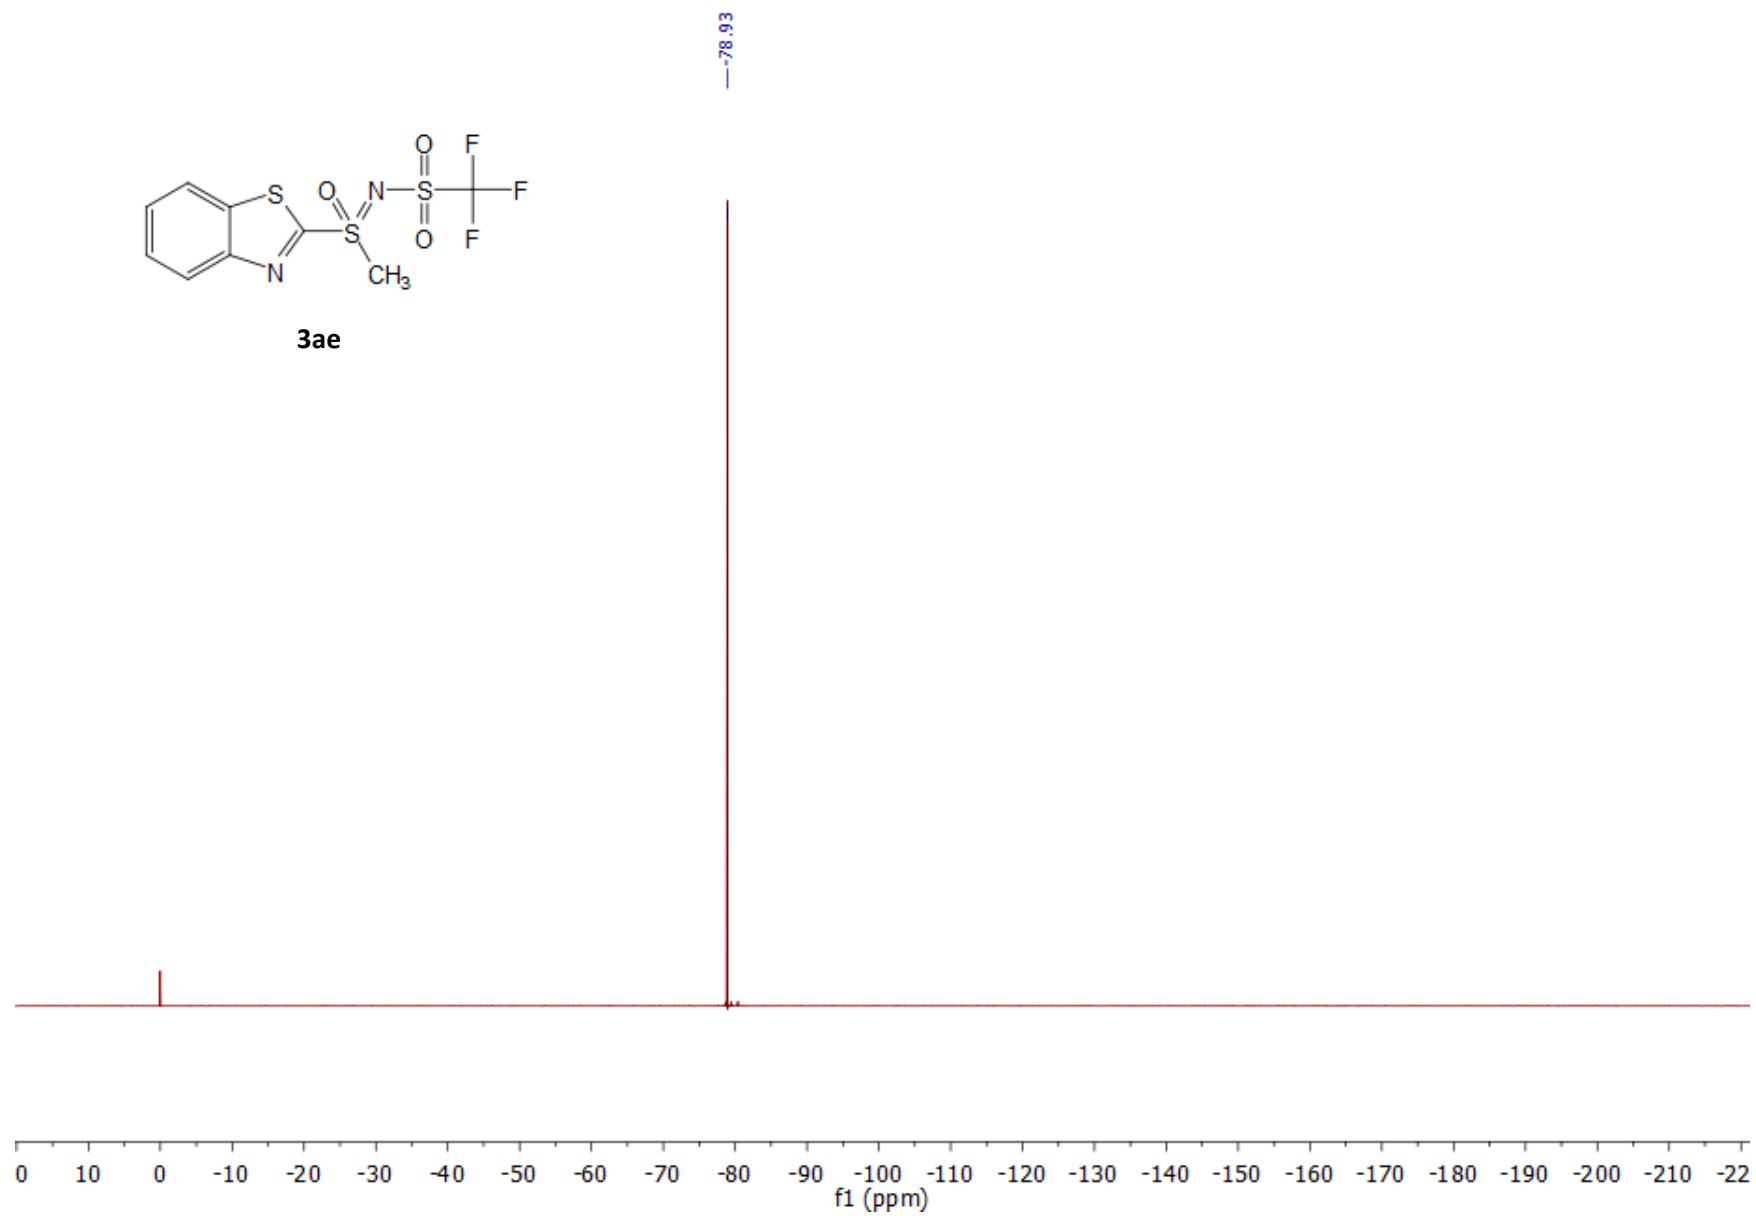

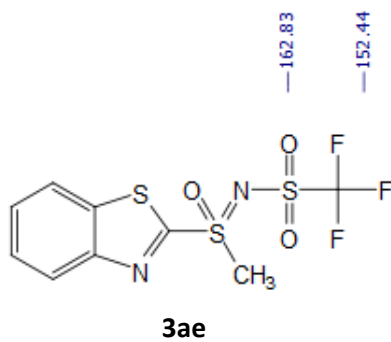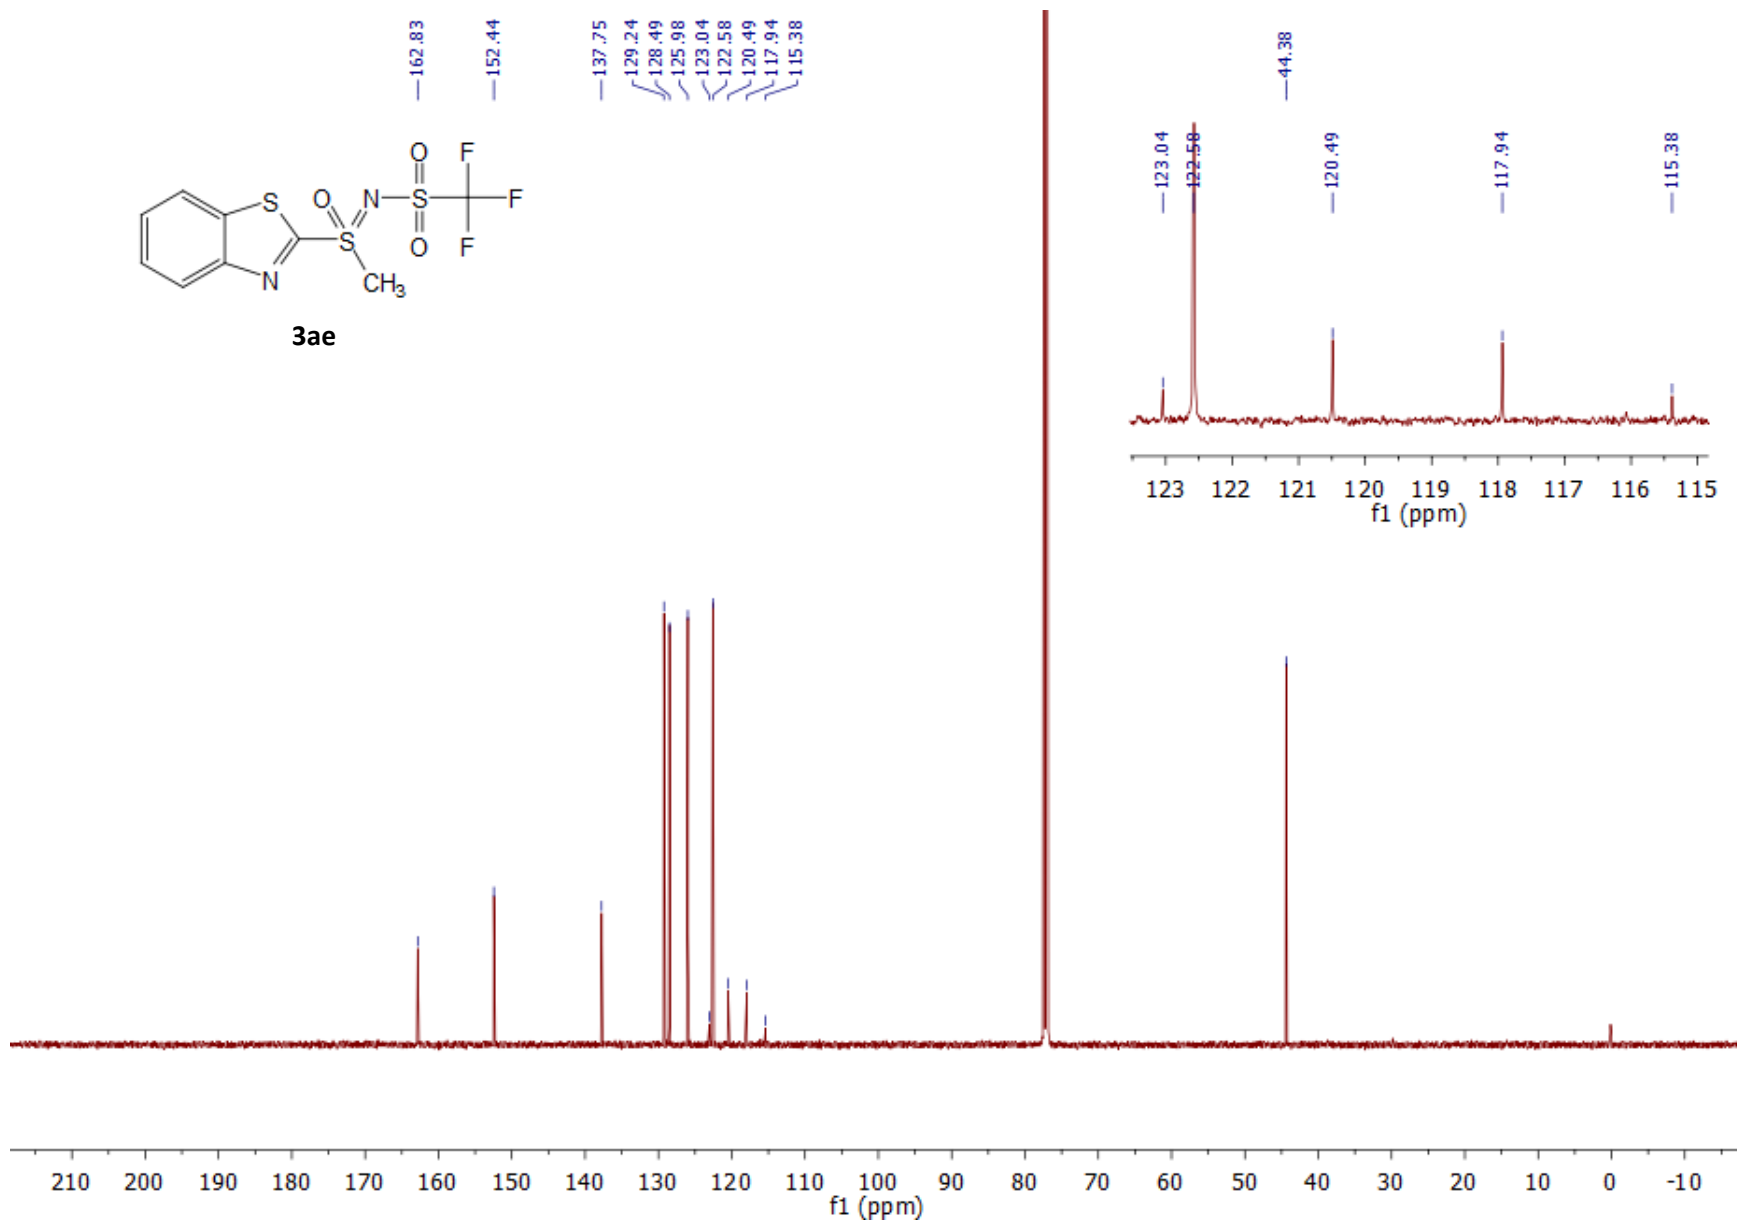

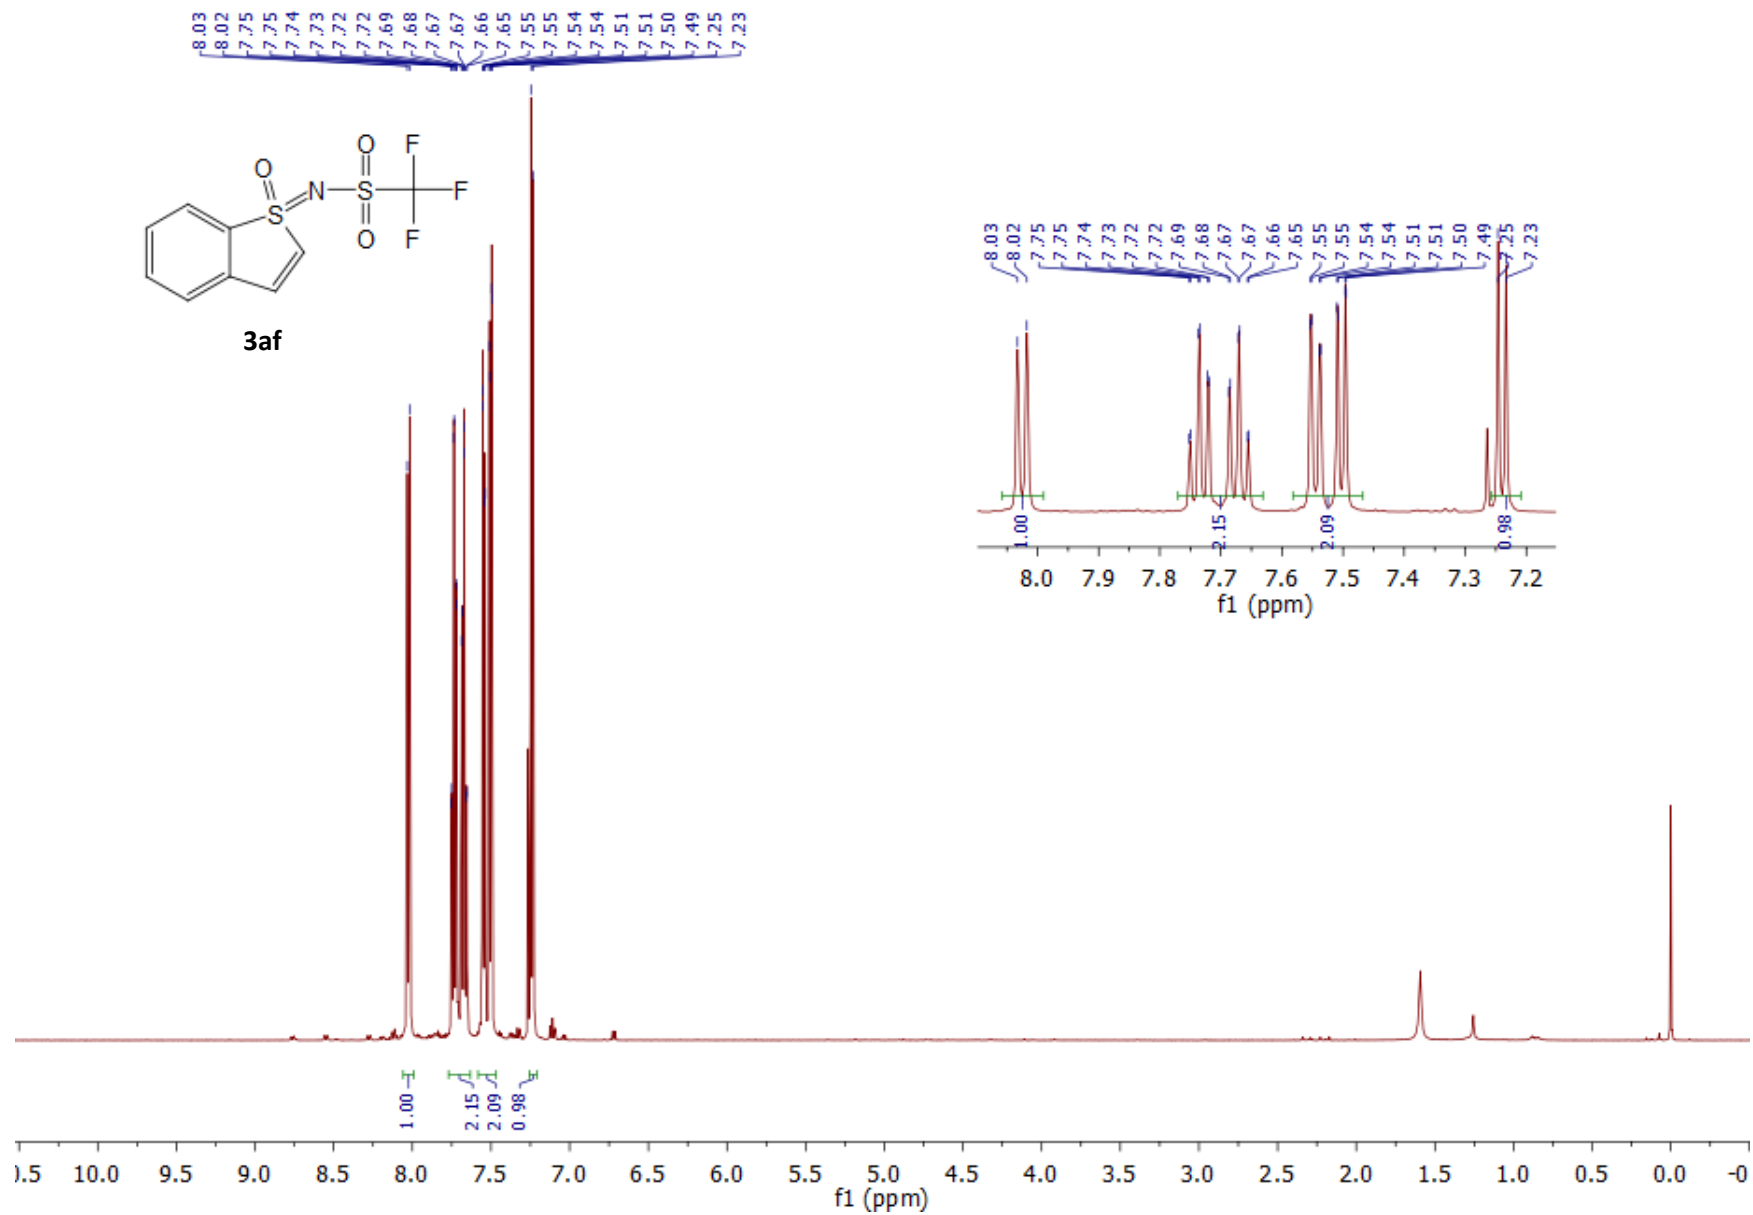

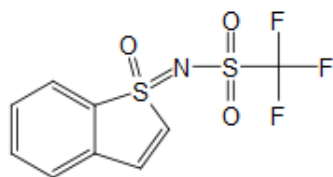

**3af**

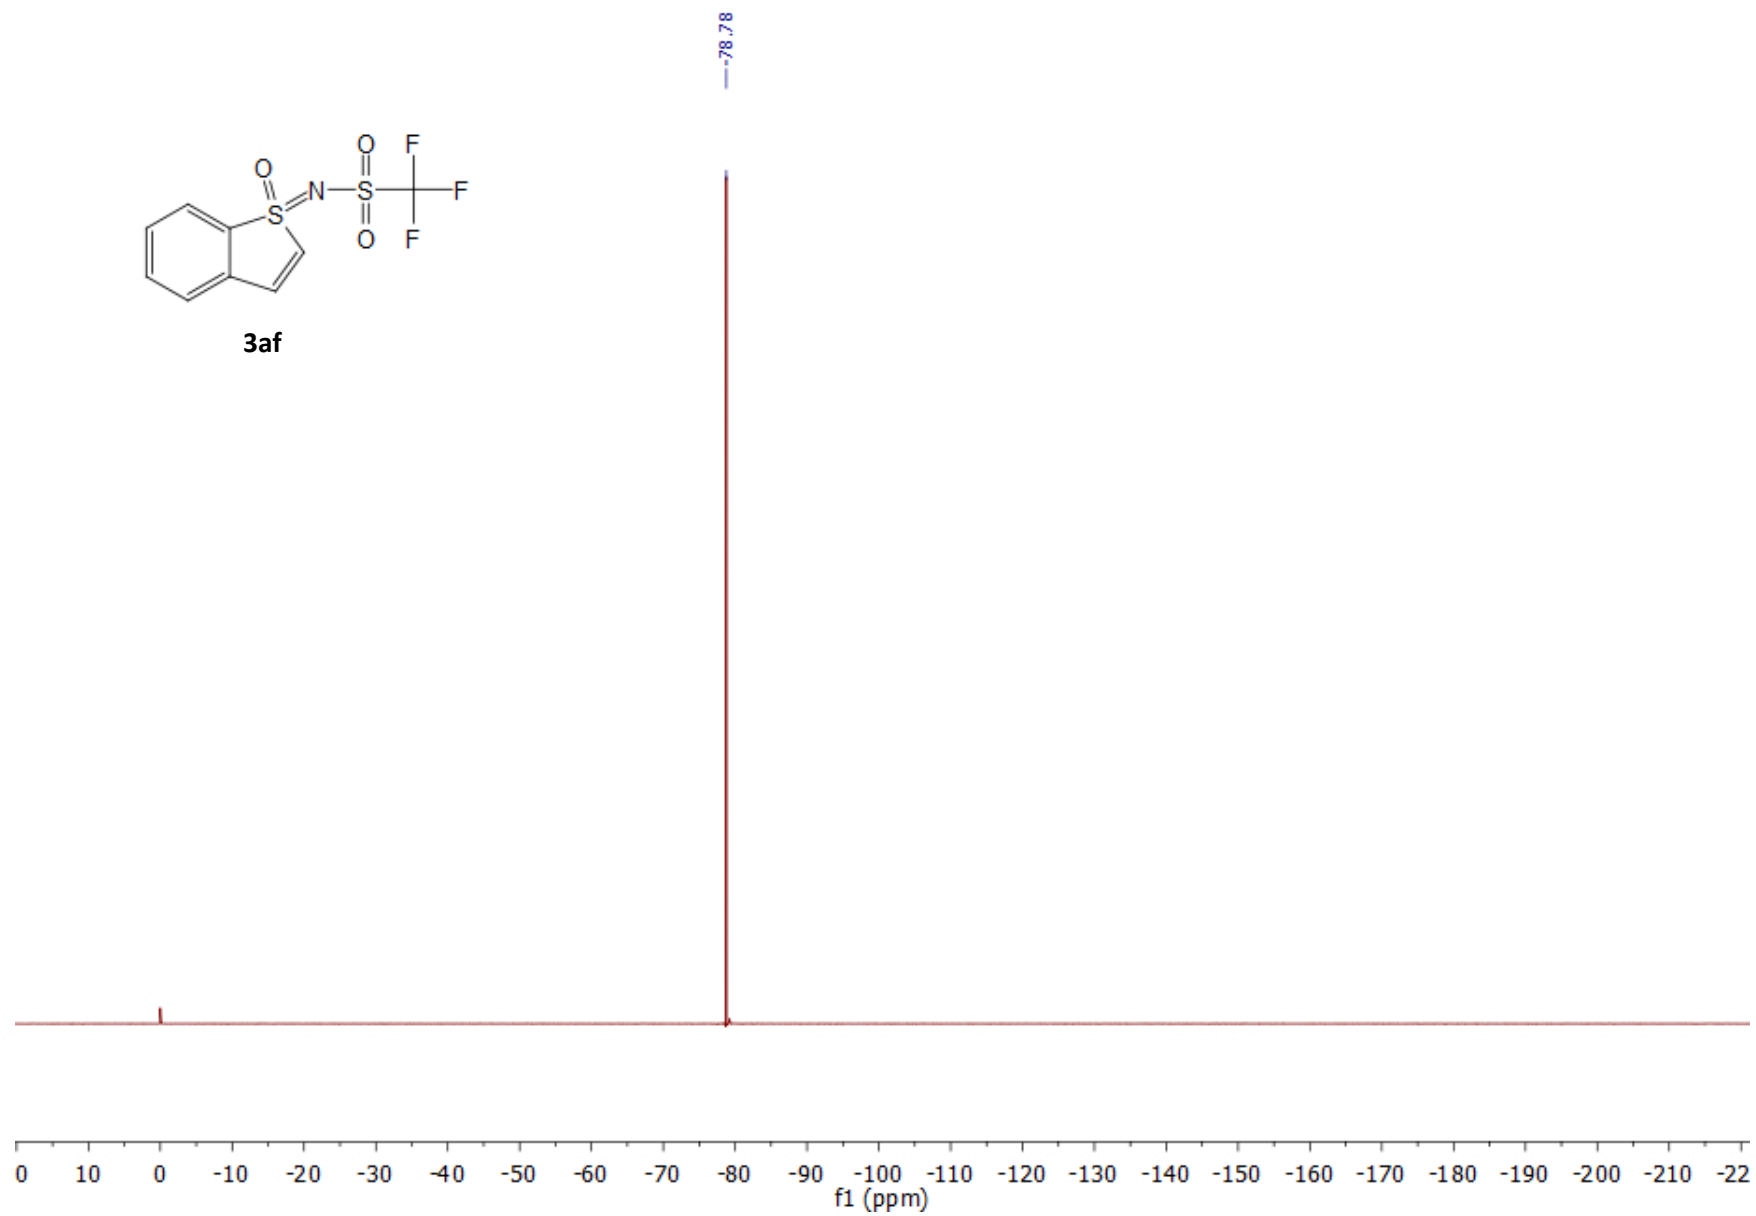

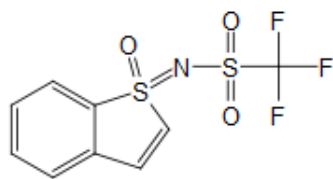

3af

135.76  
135.70  
135.05  
132.02  
131.94  
129.42  
126.44  
124.38  
123.20  
120.64  
118.09  
115.53

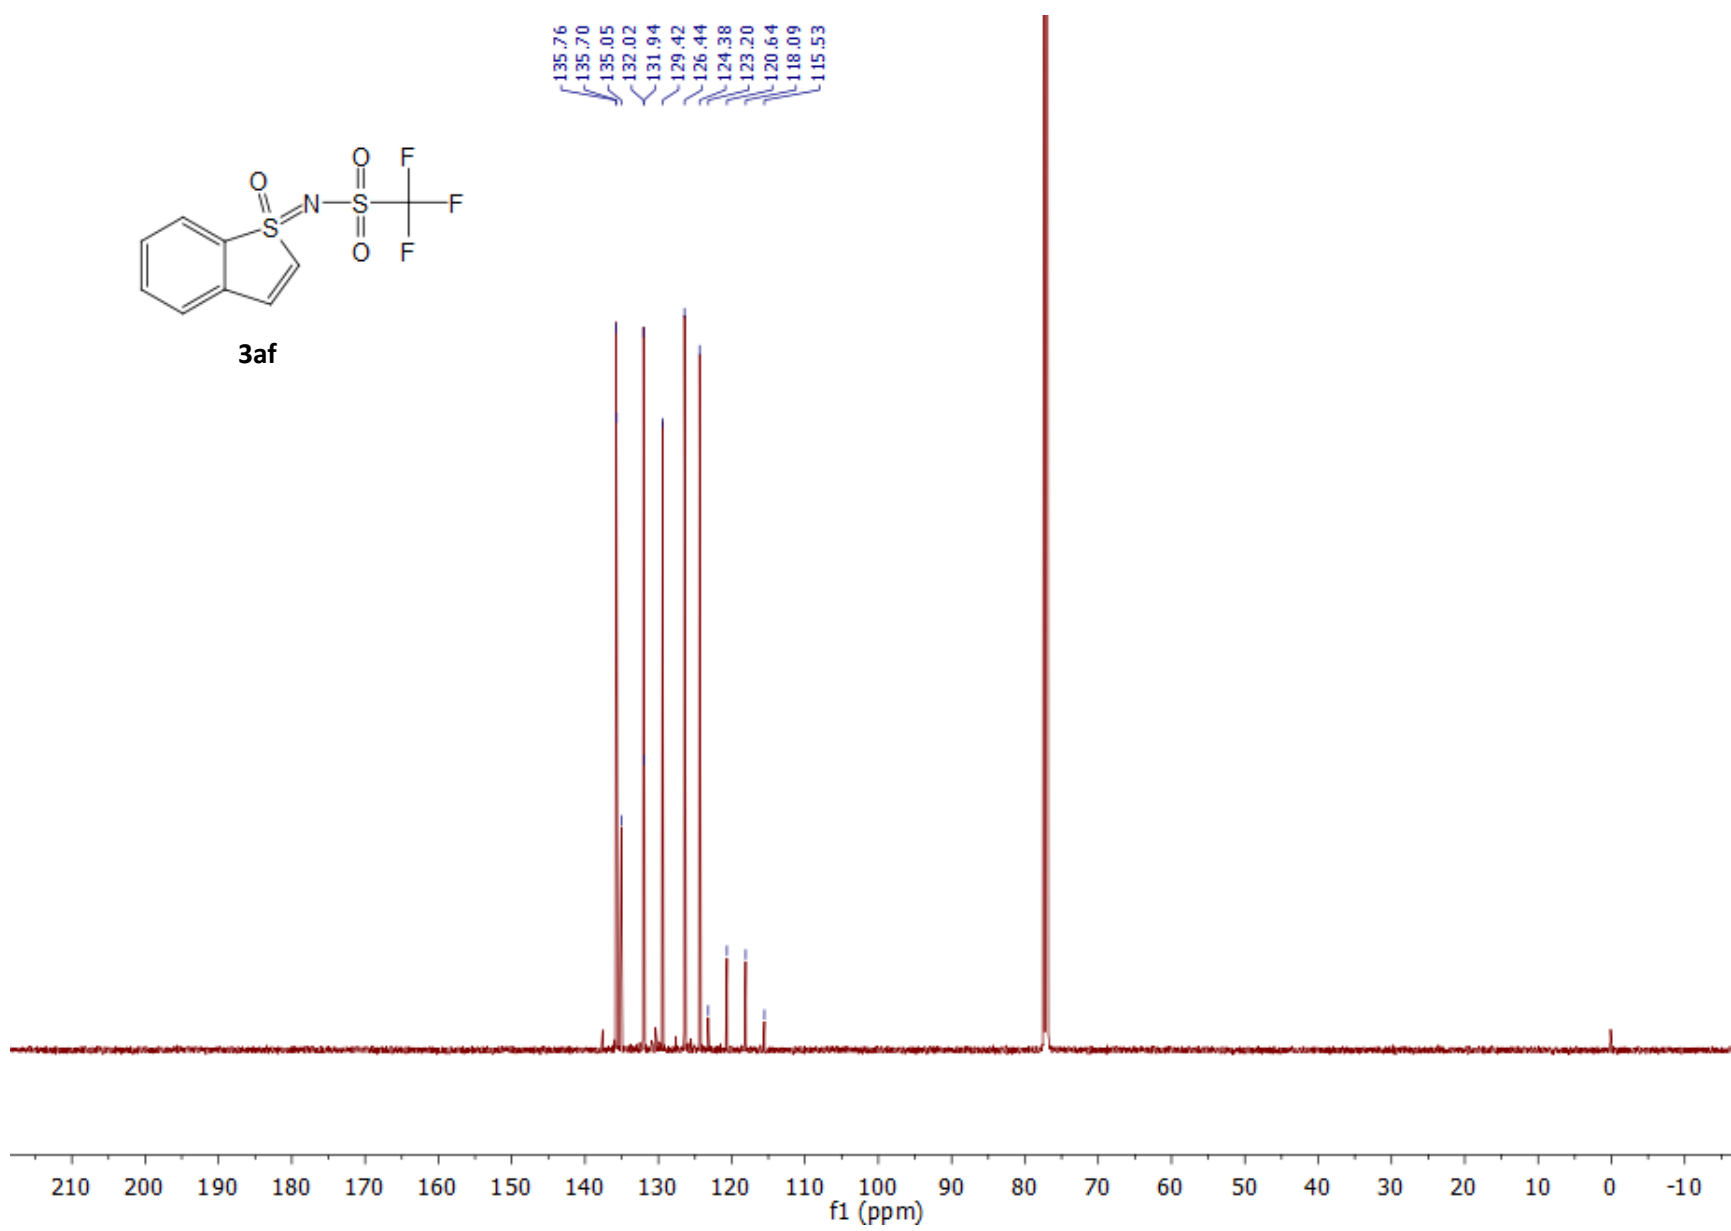

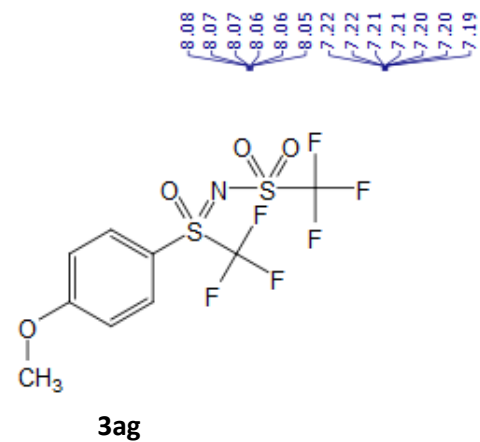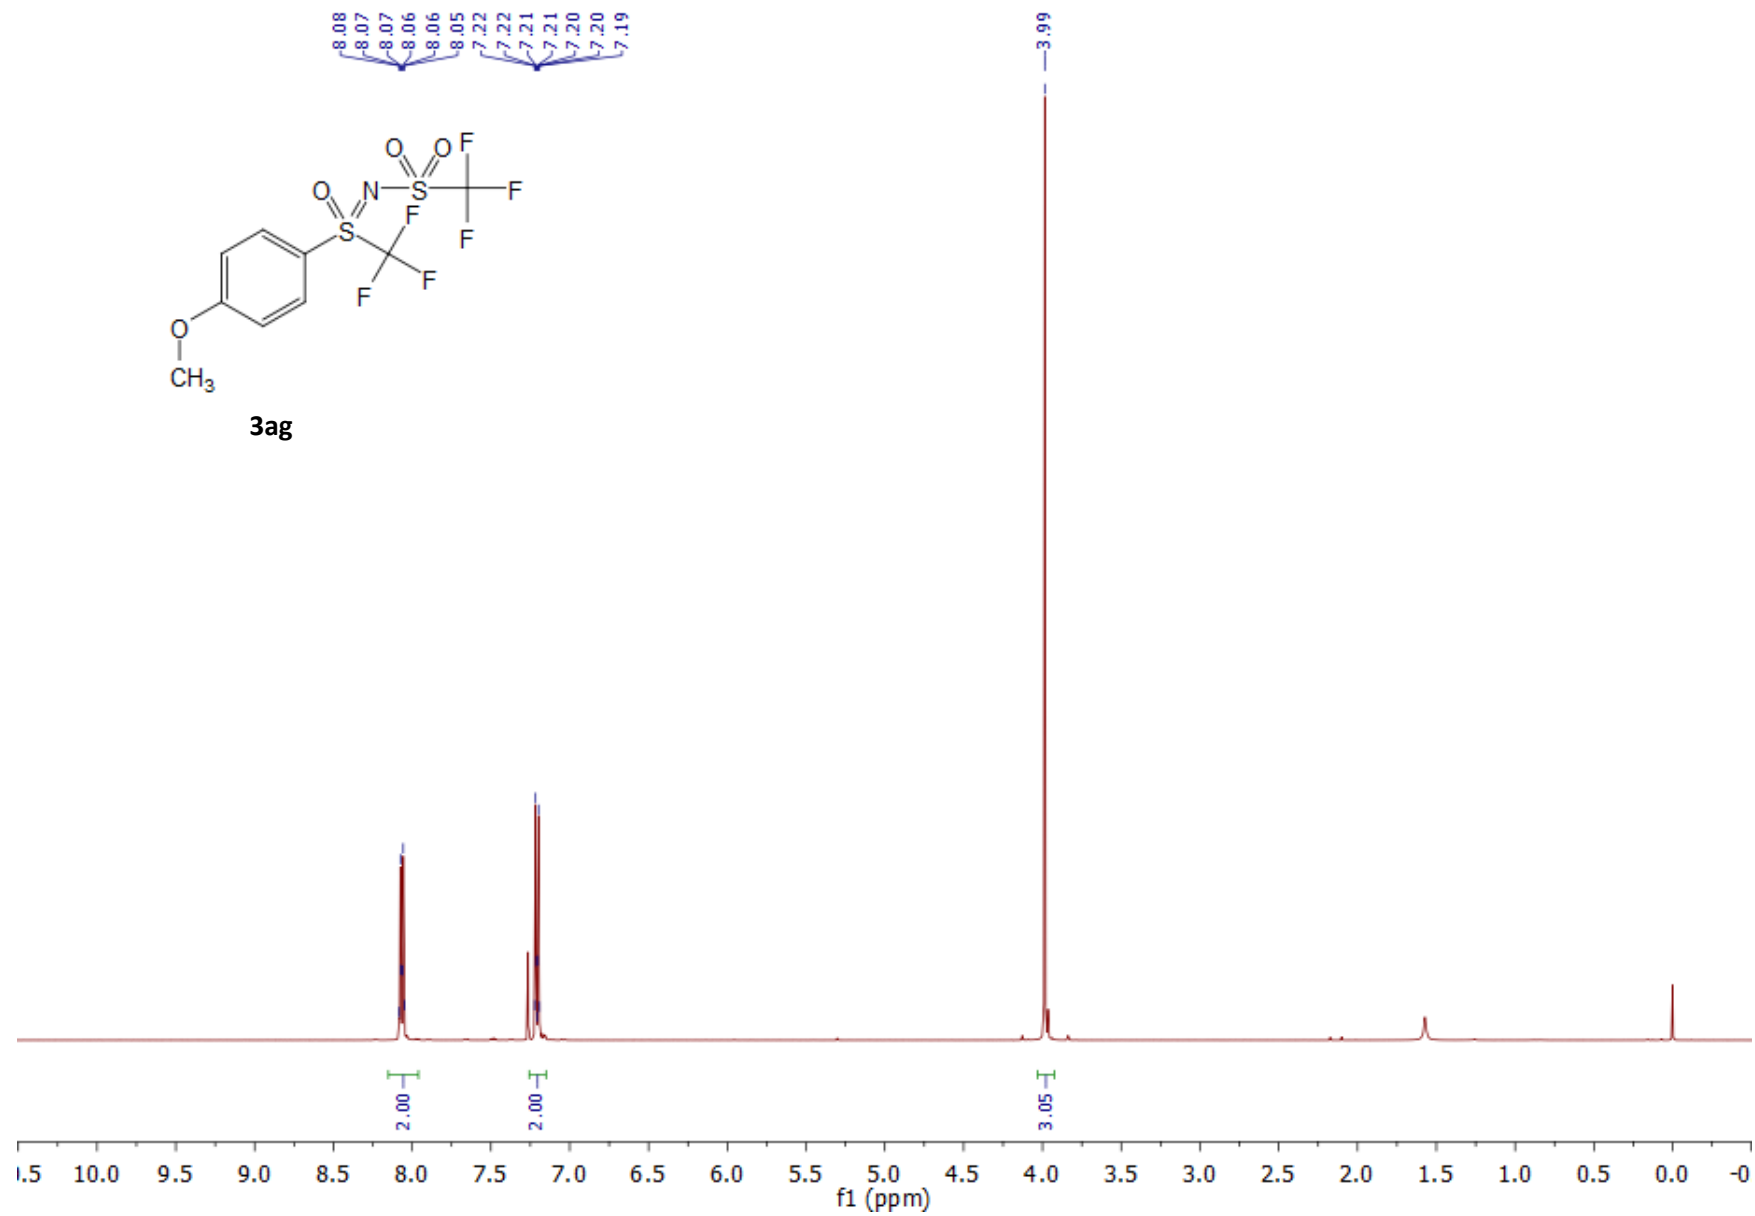

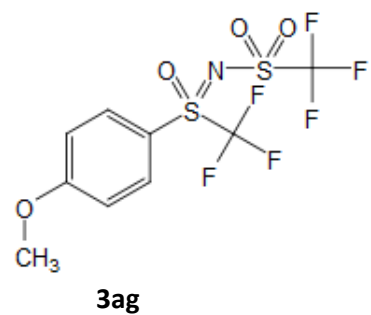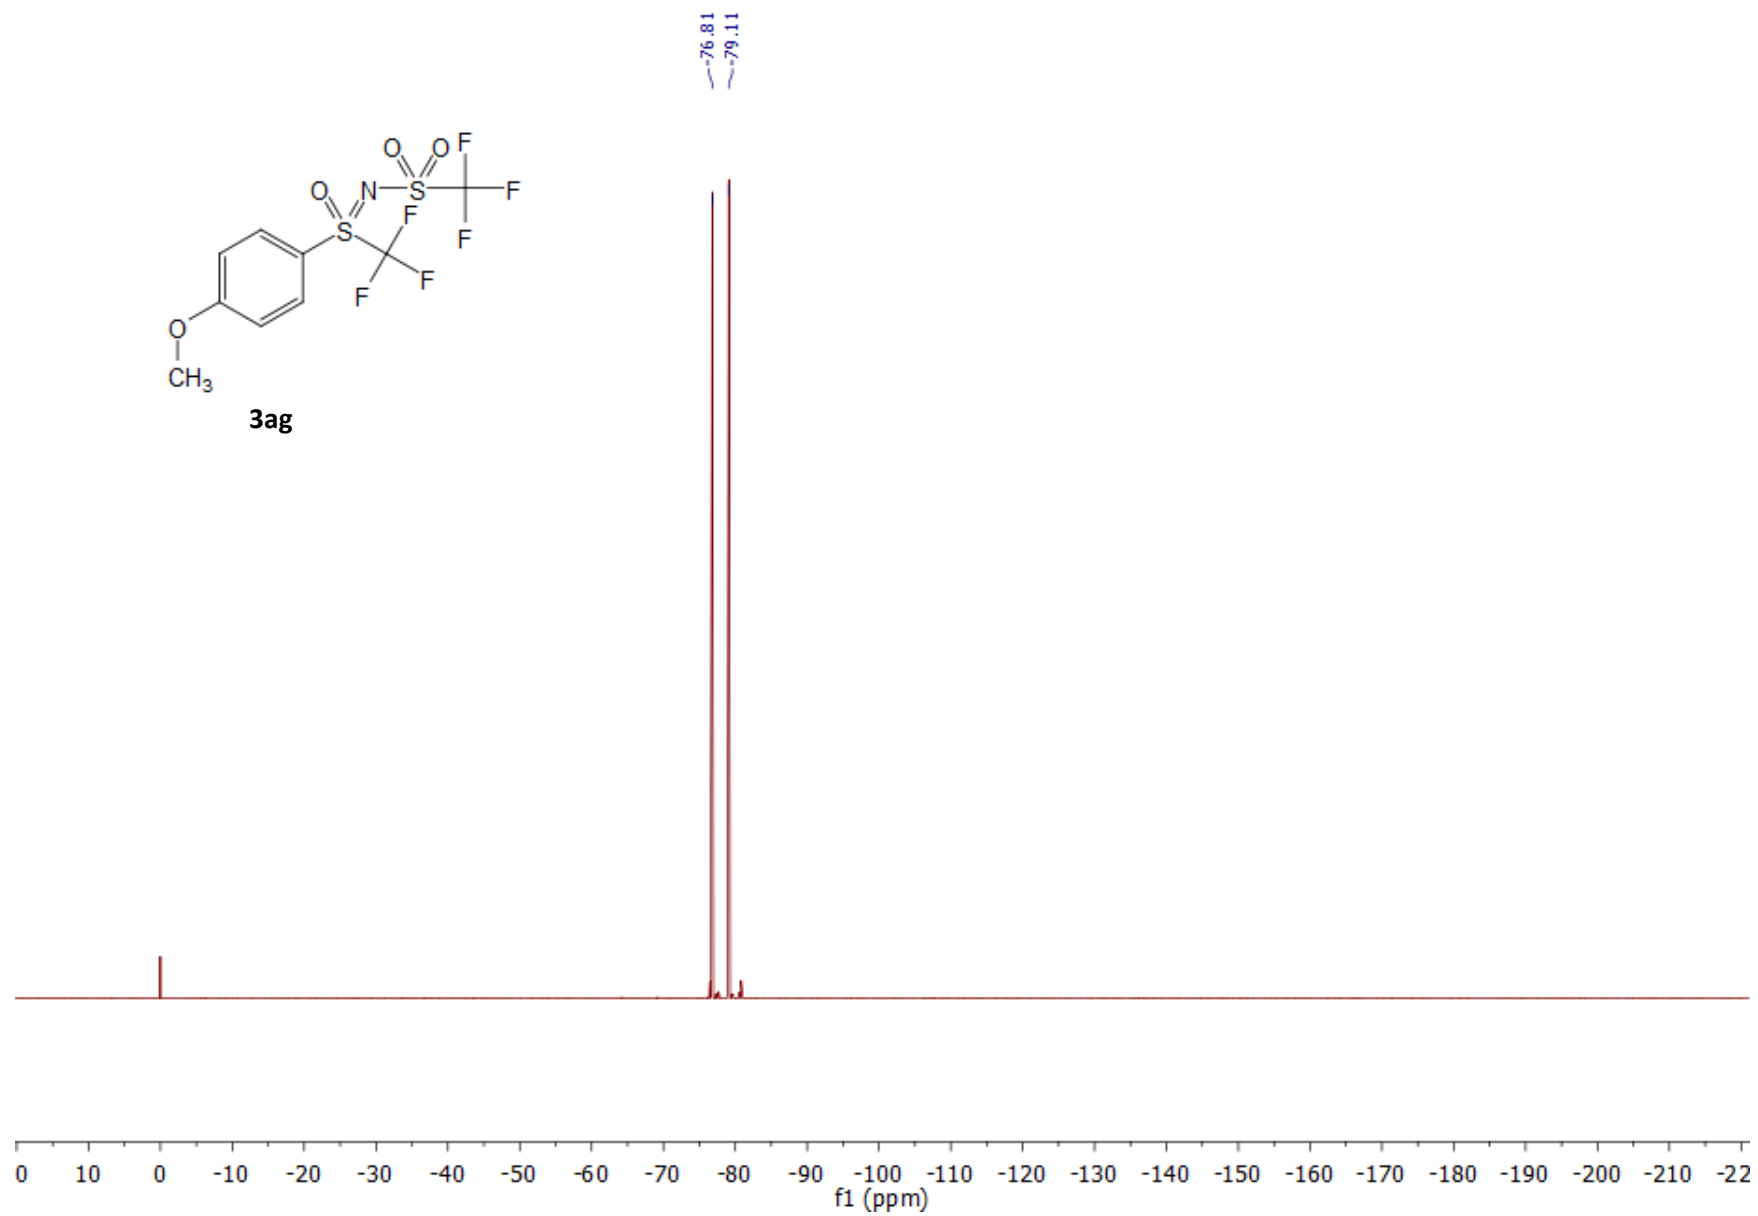

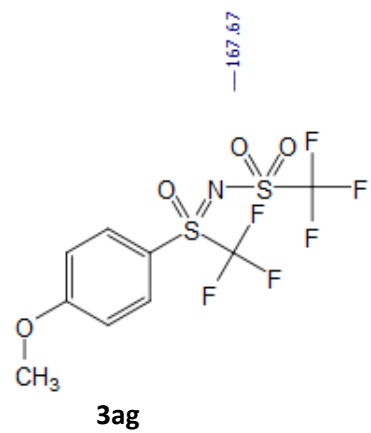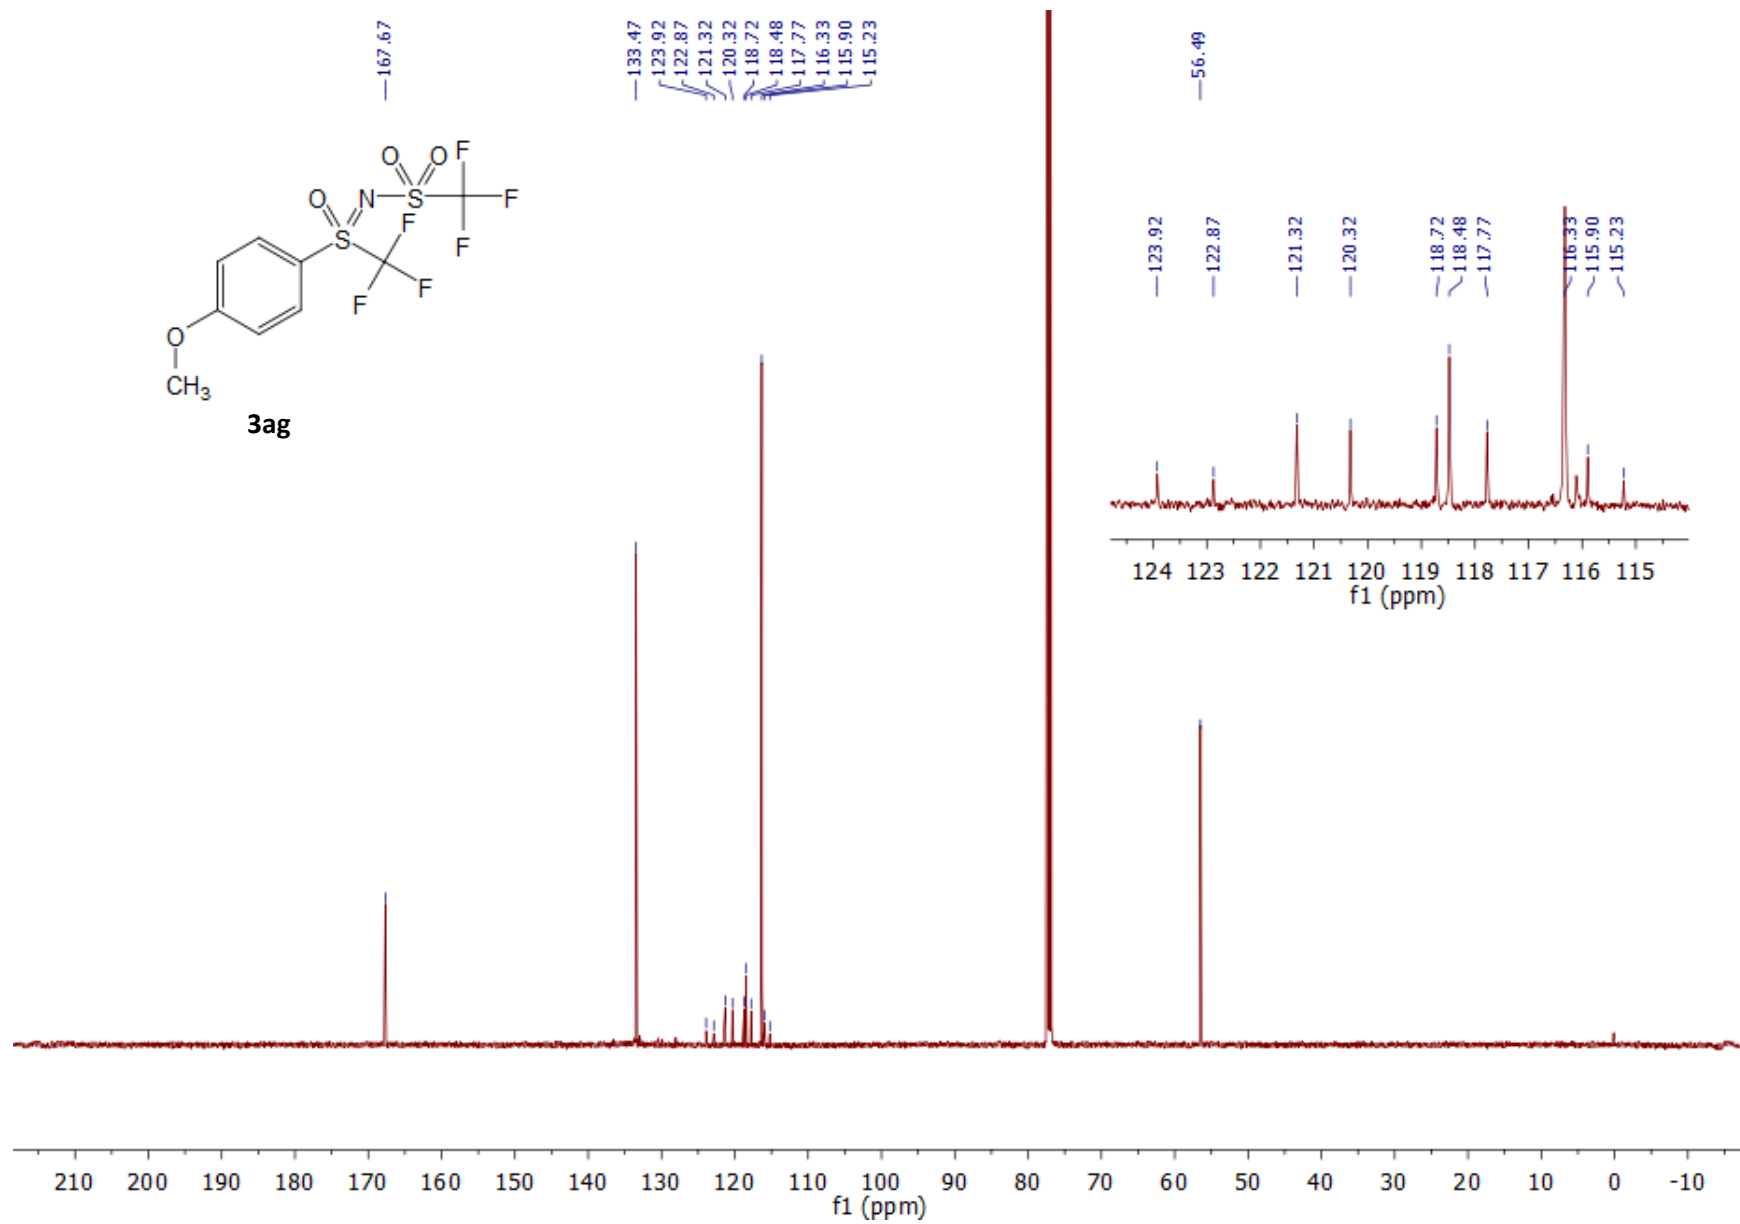



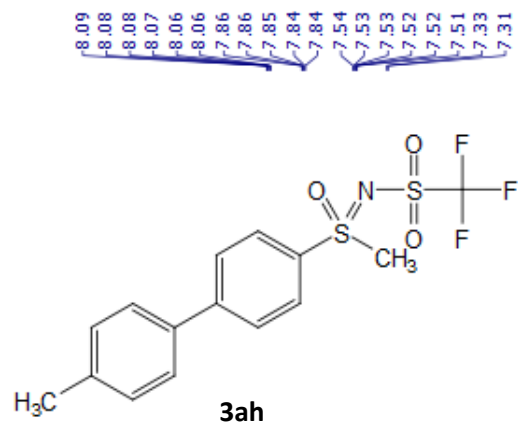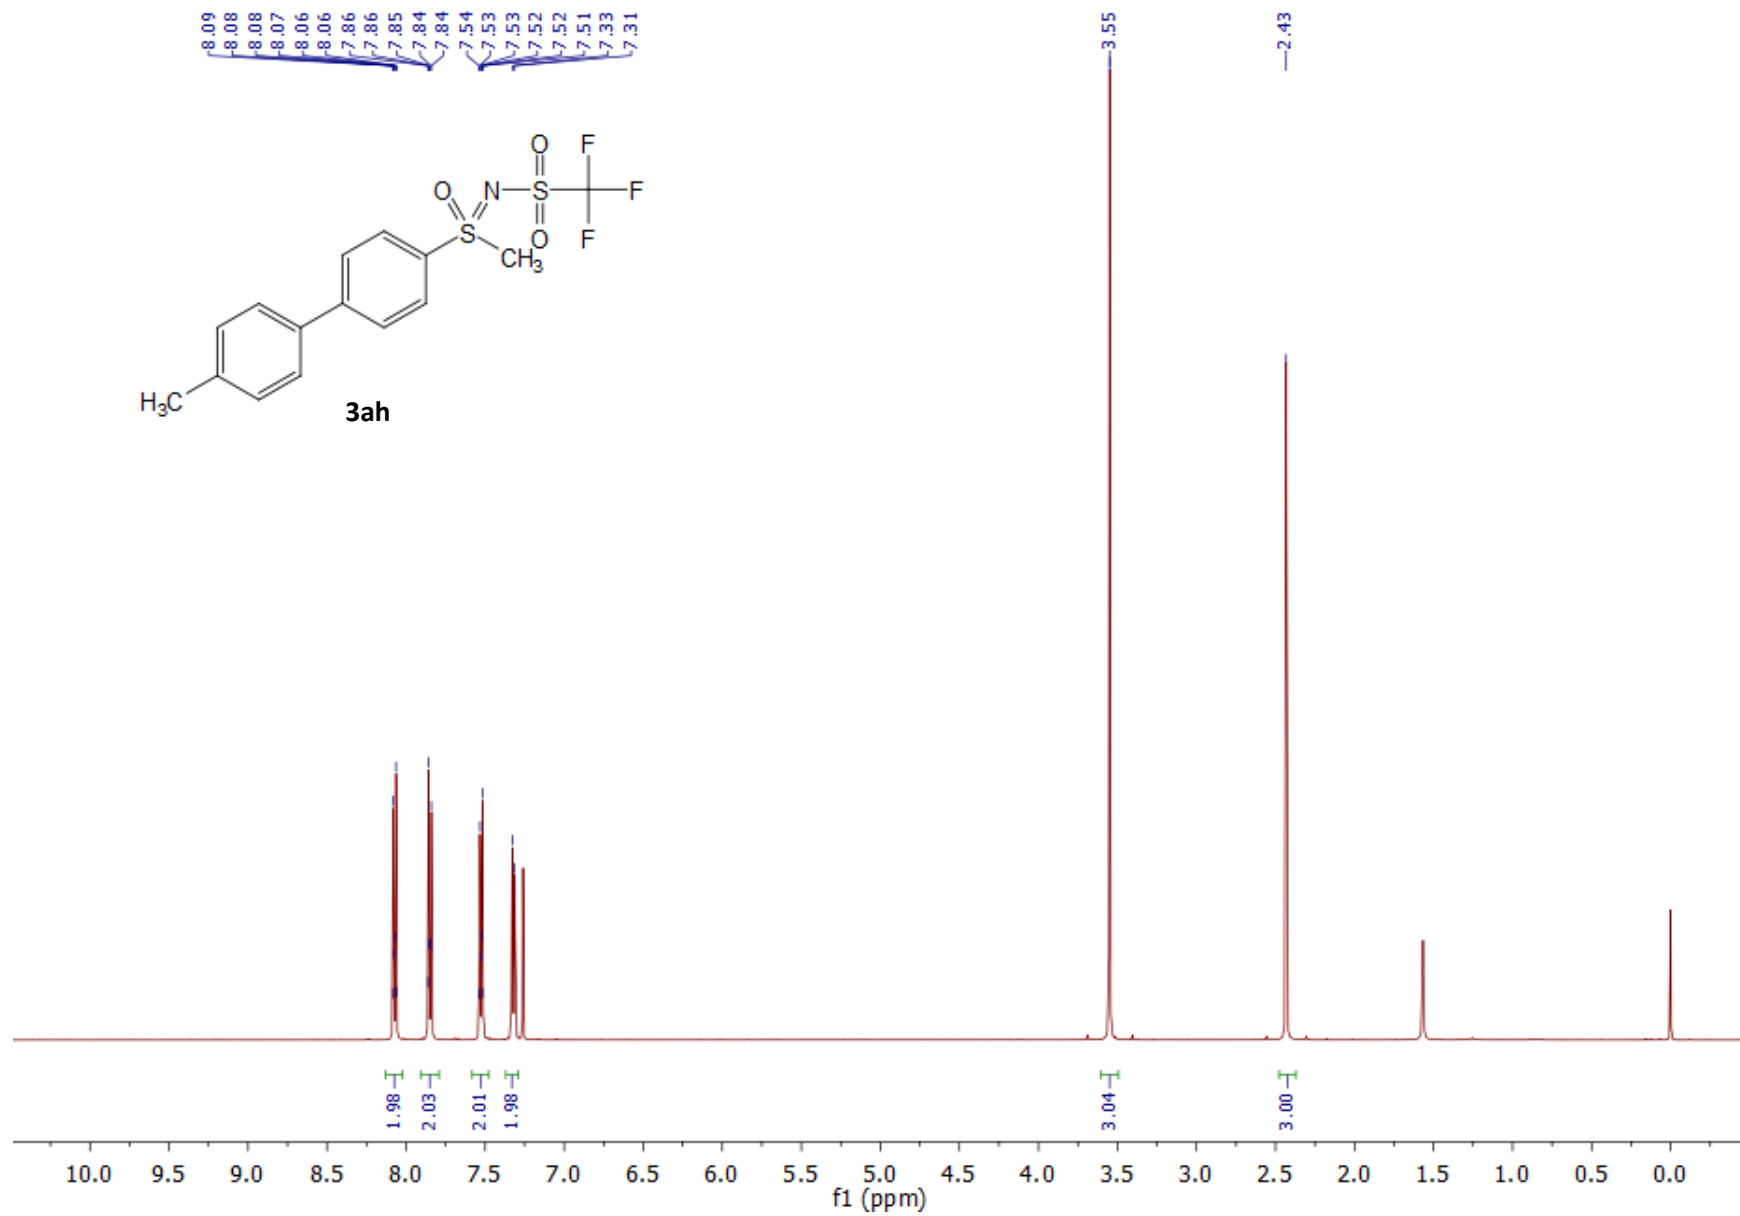

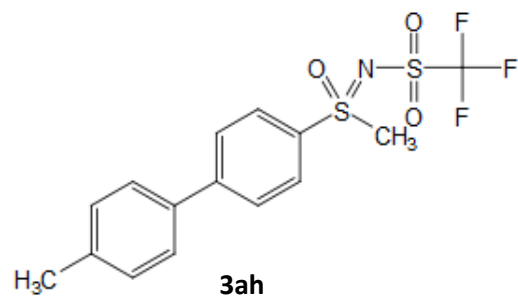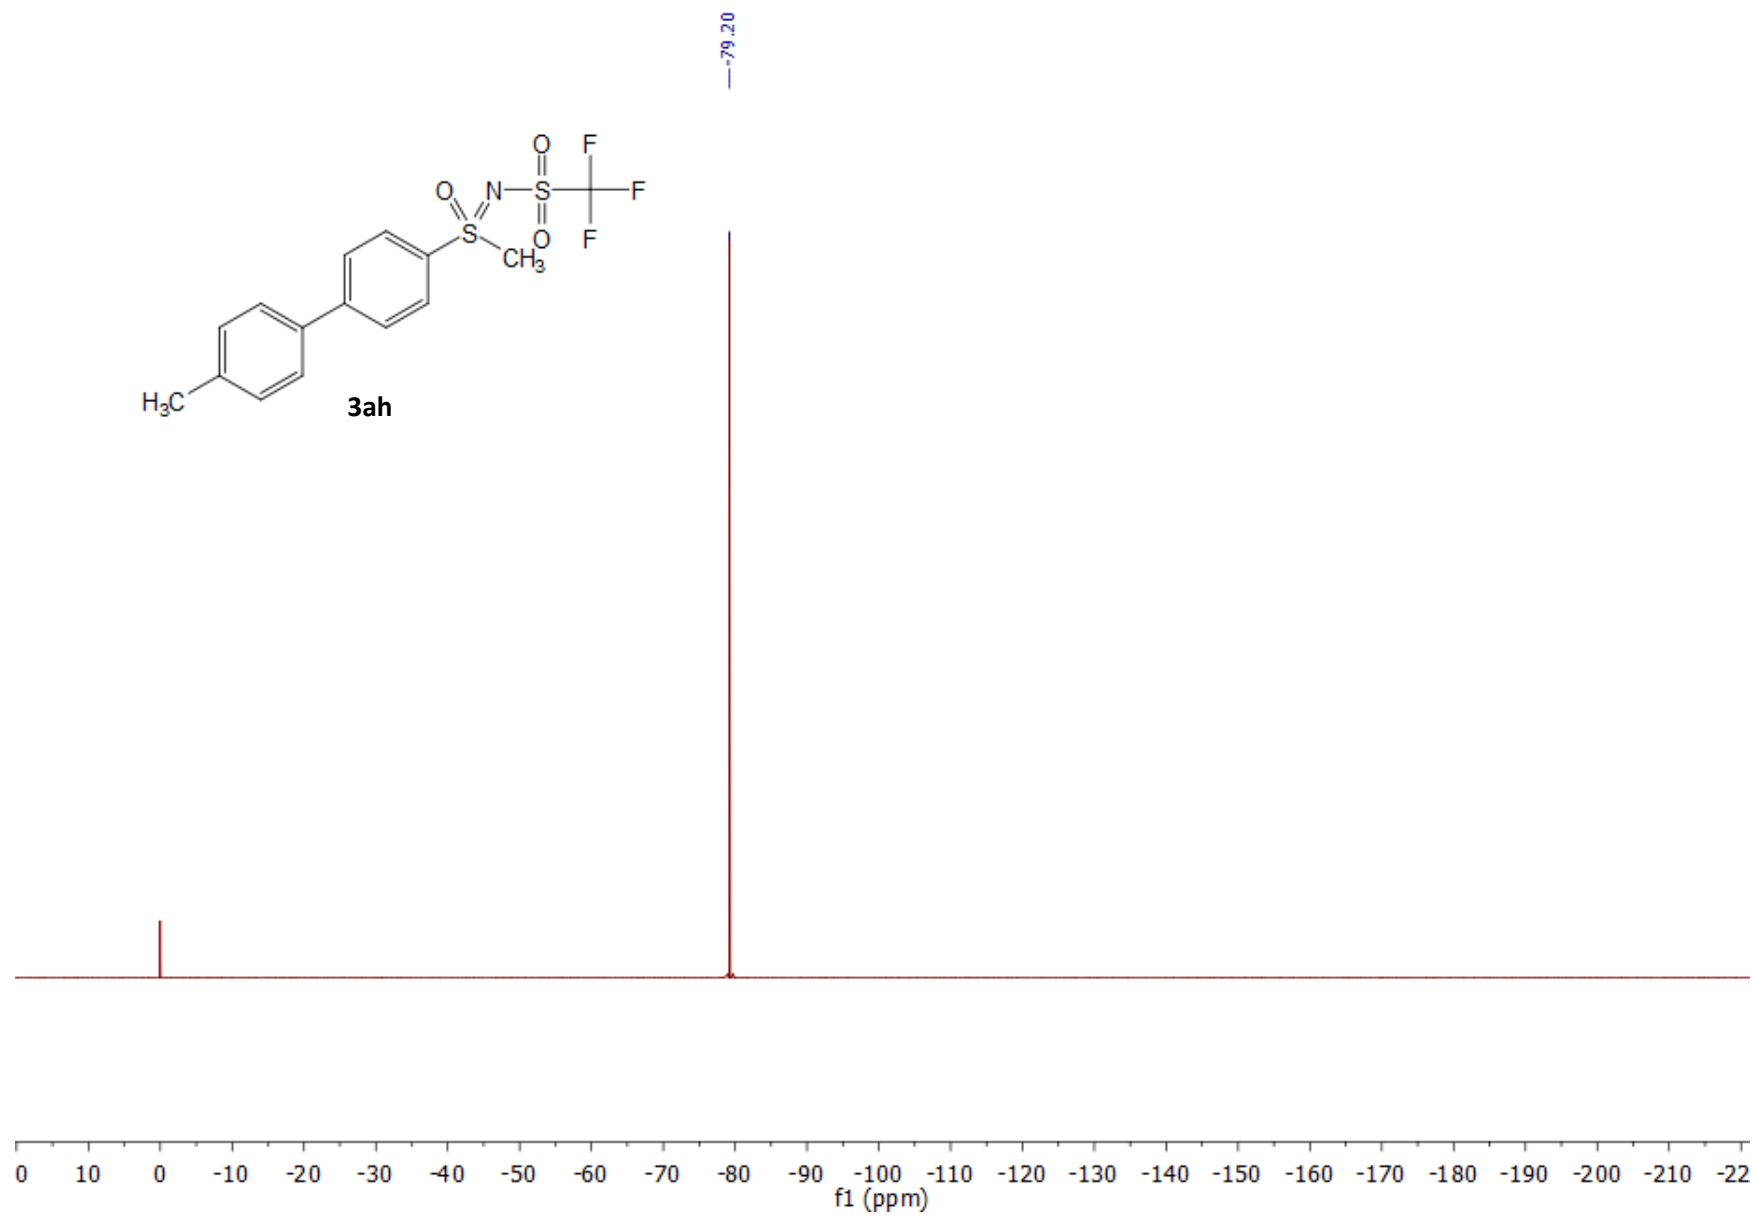

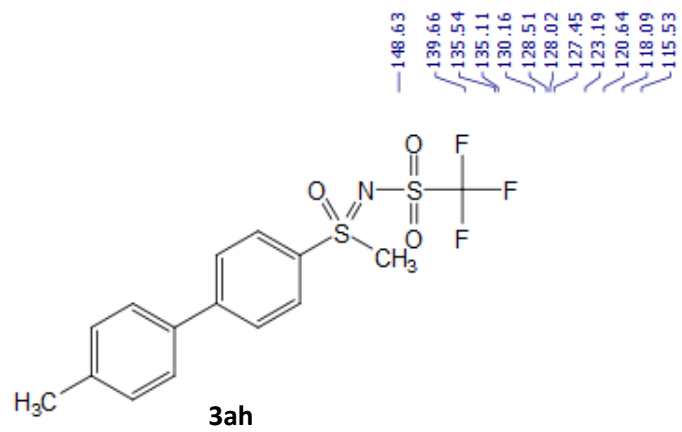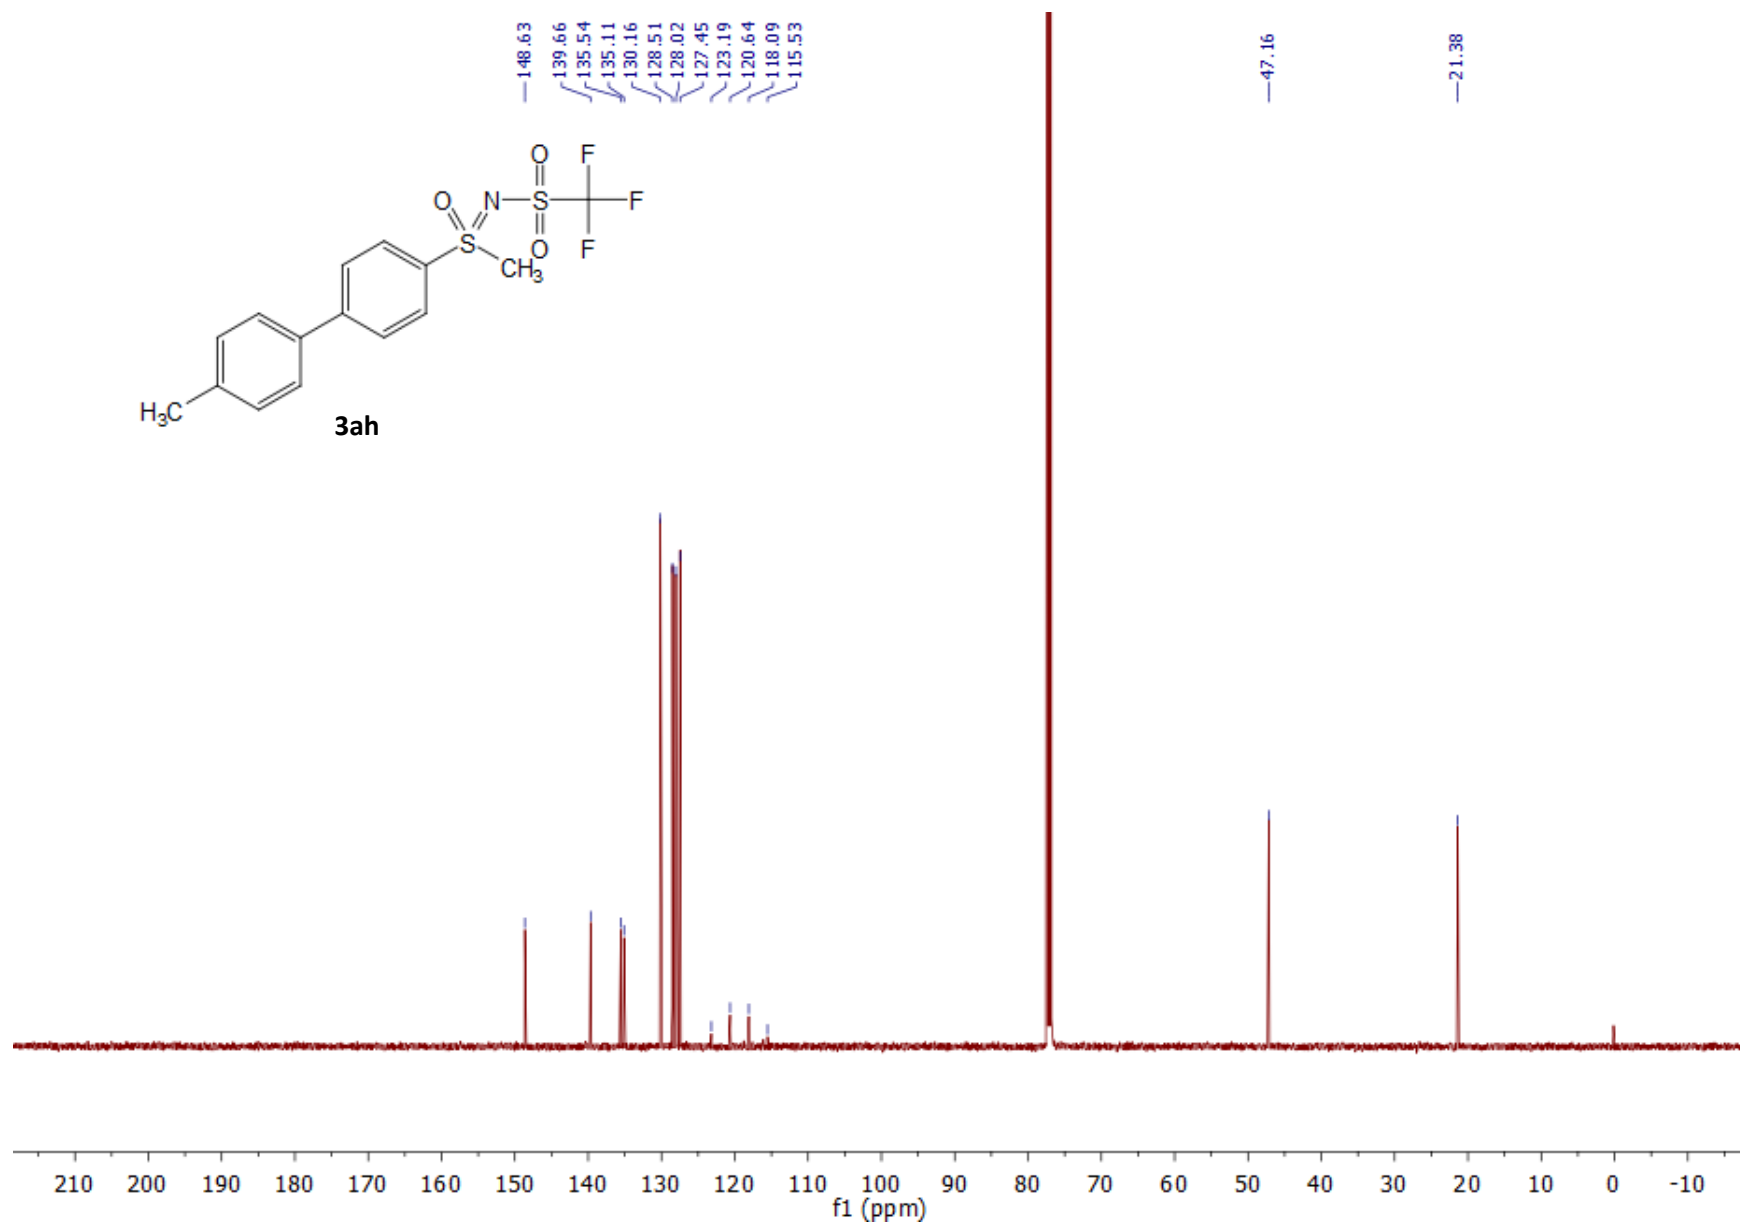

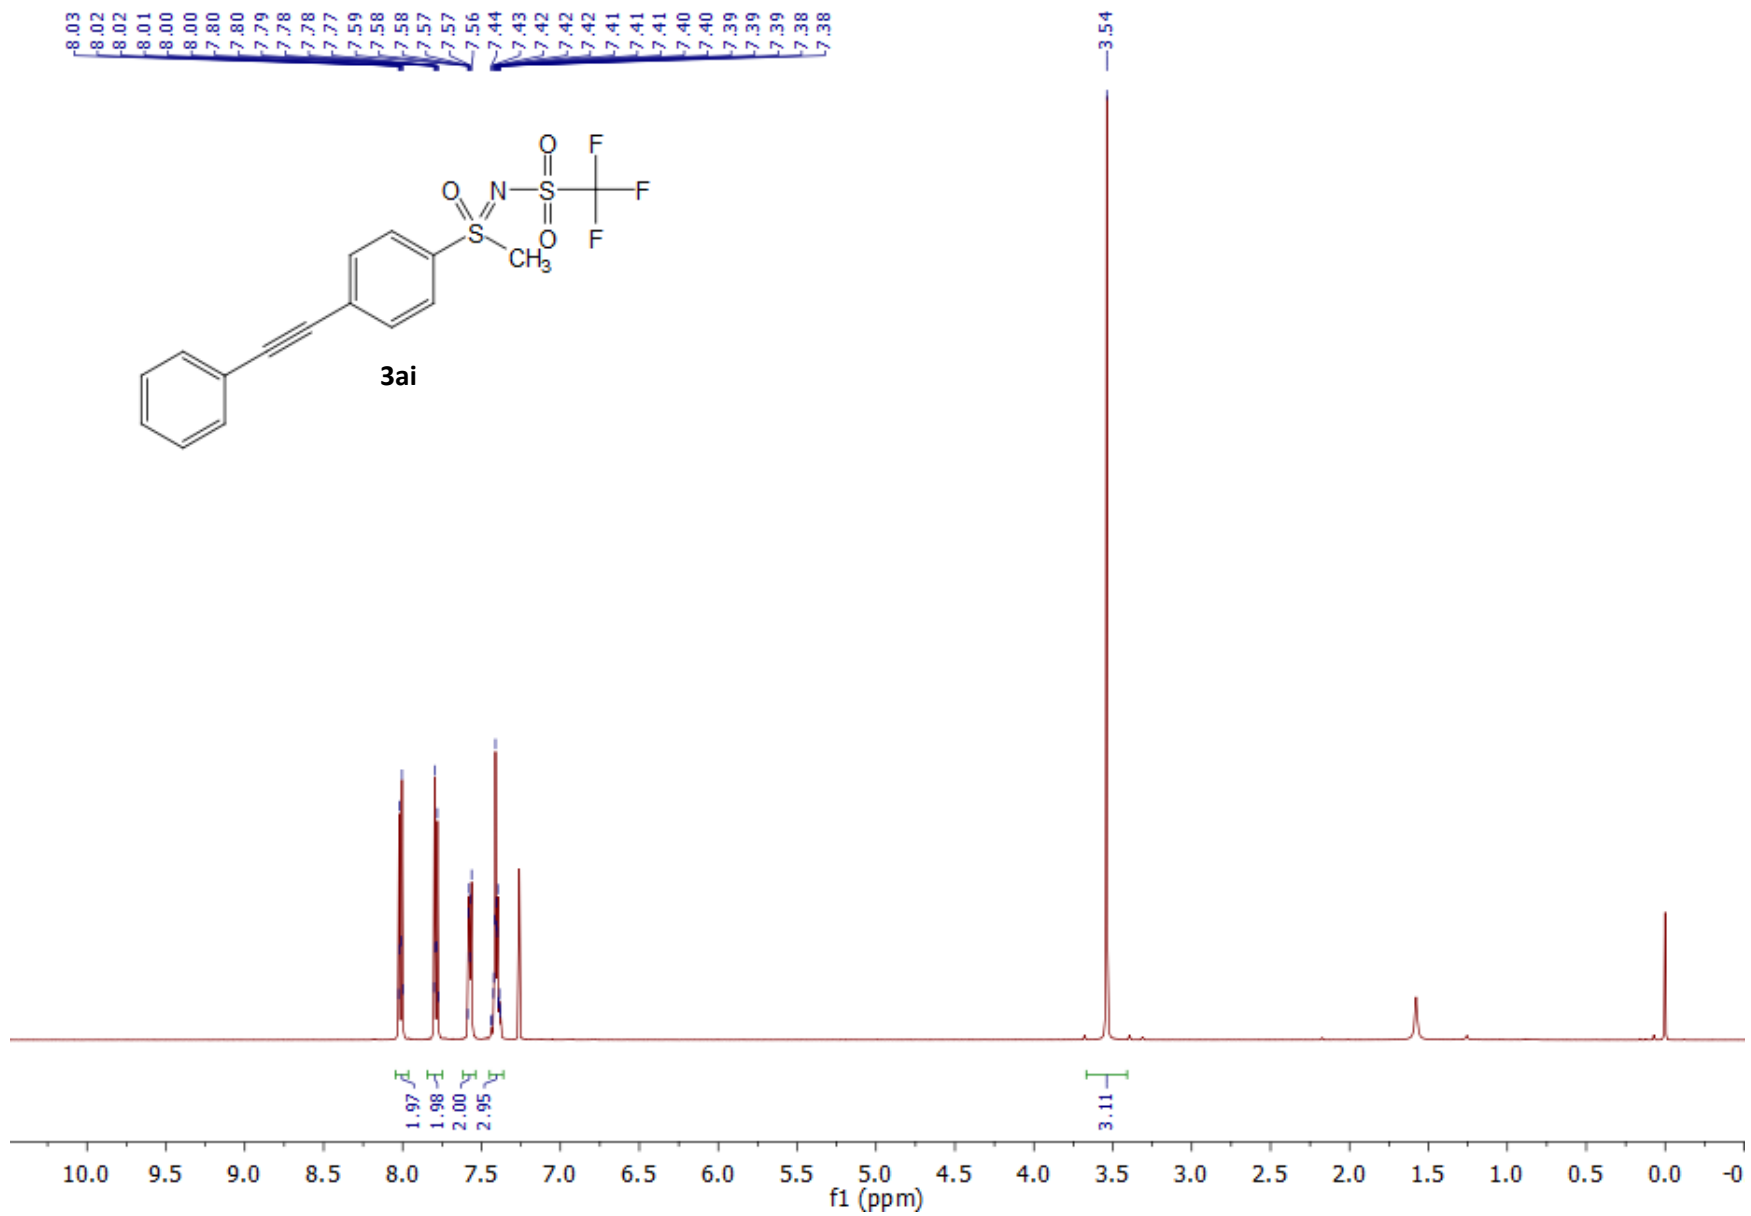

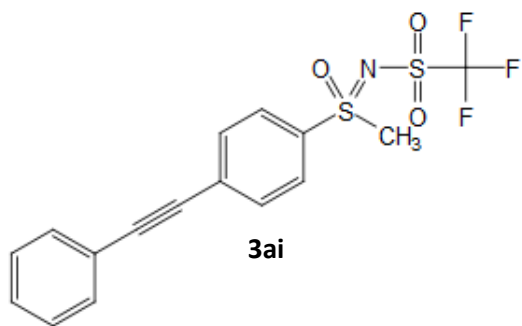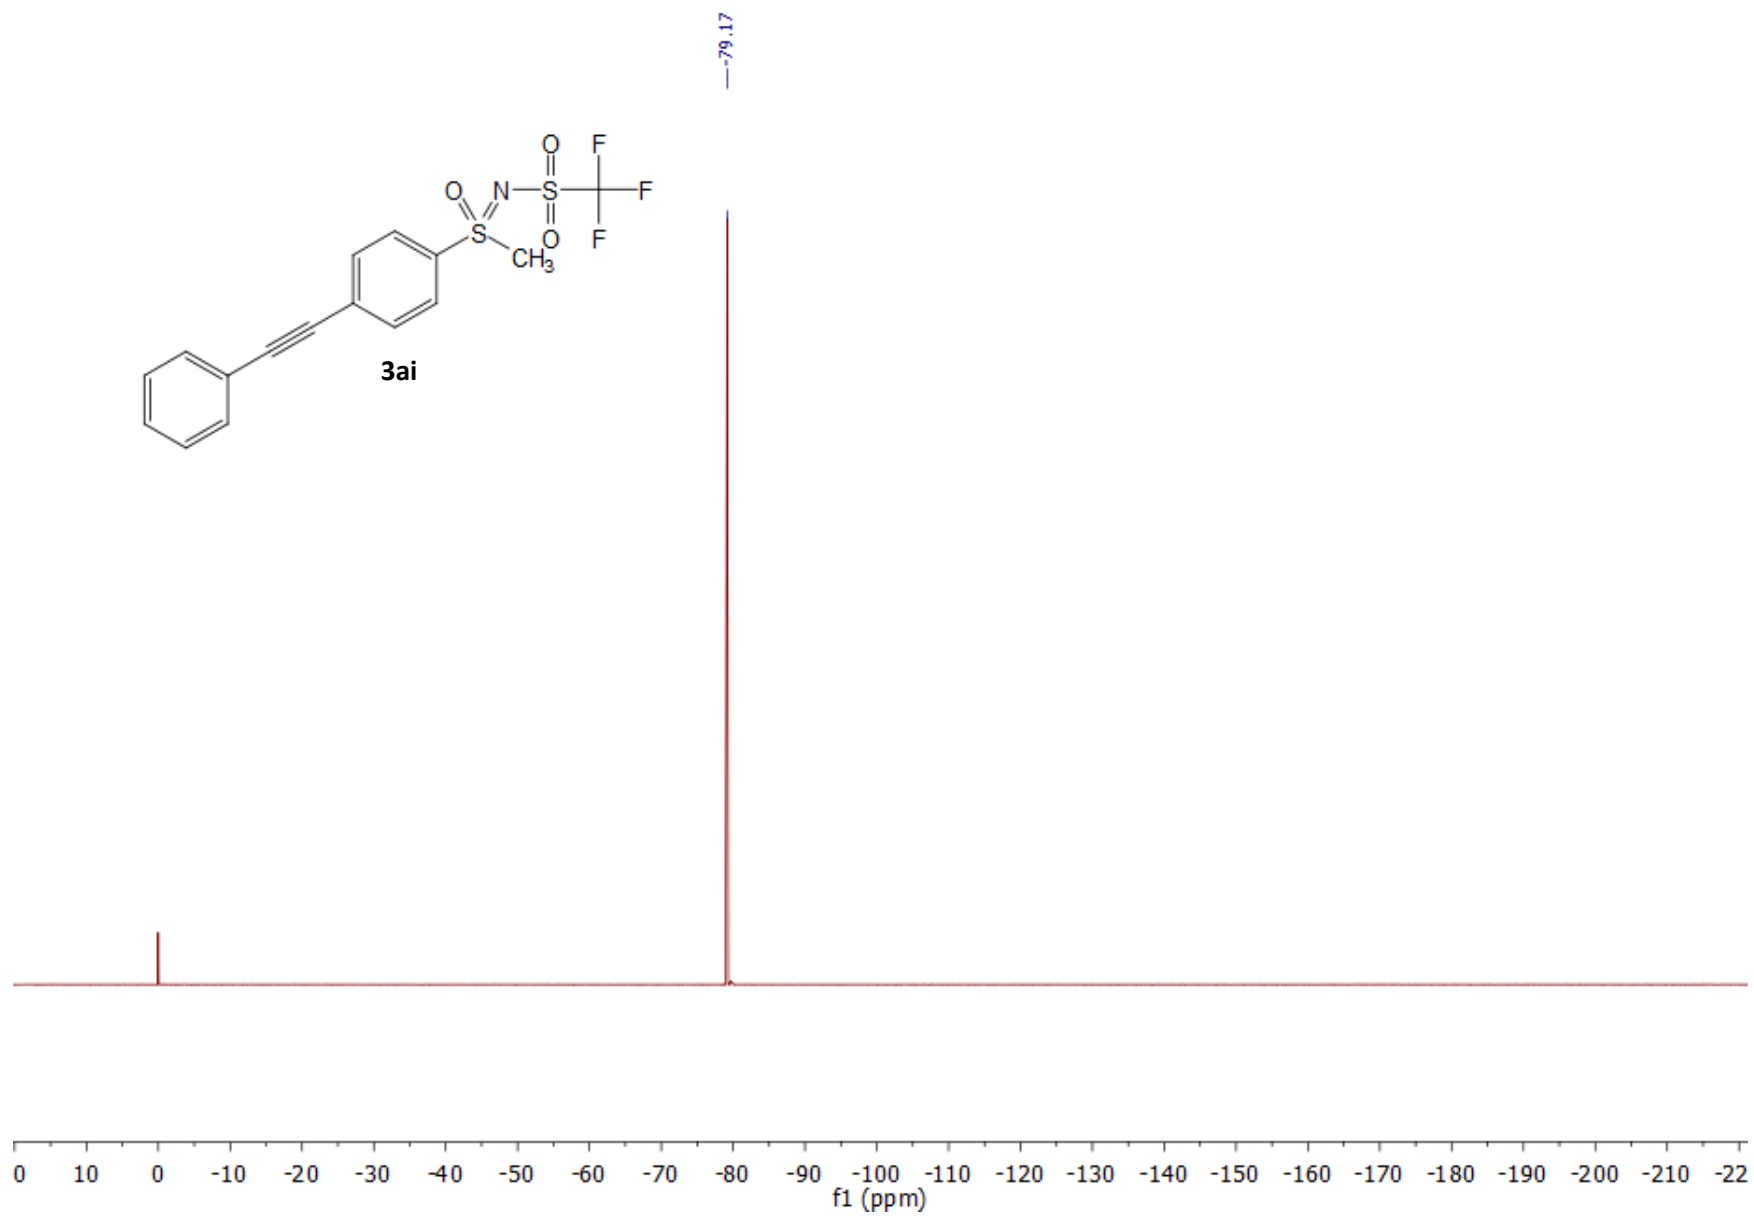

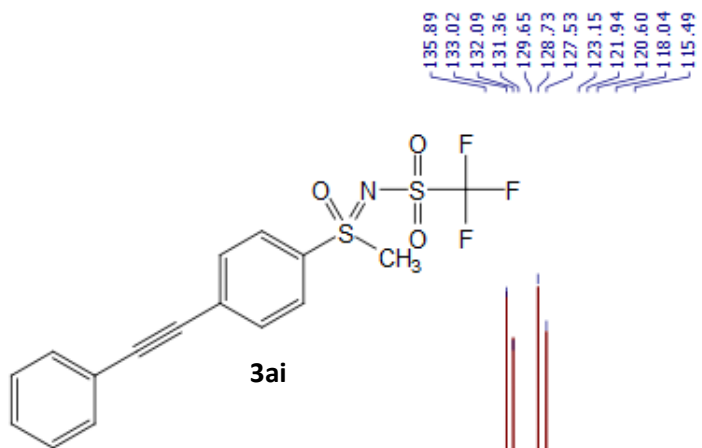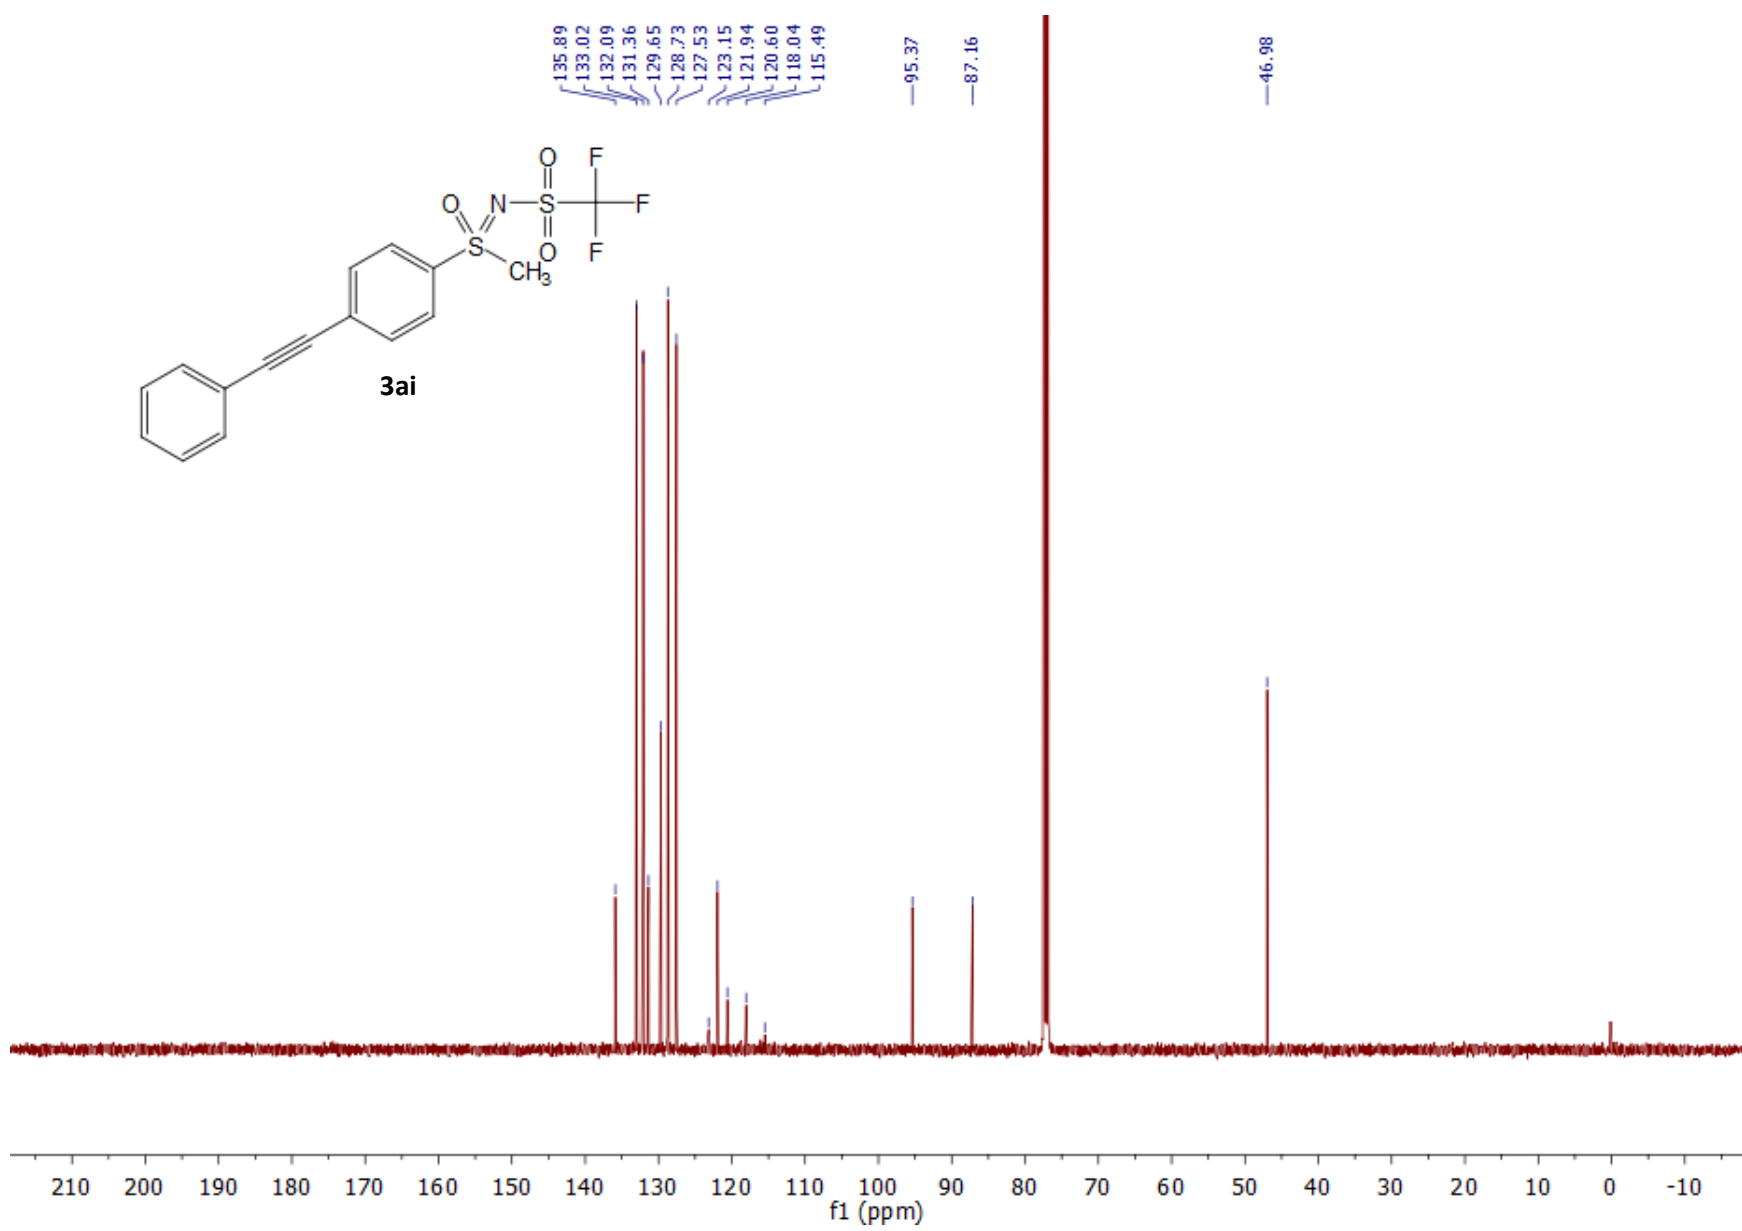

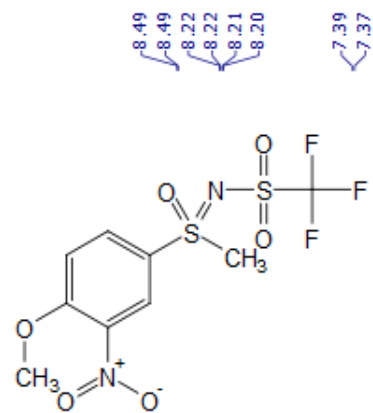

3aj

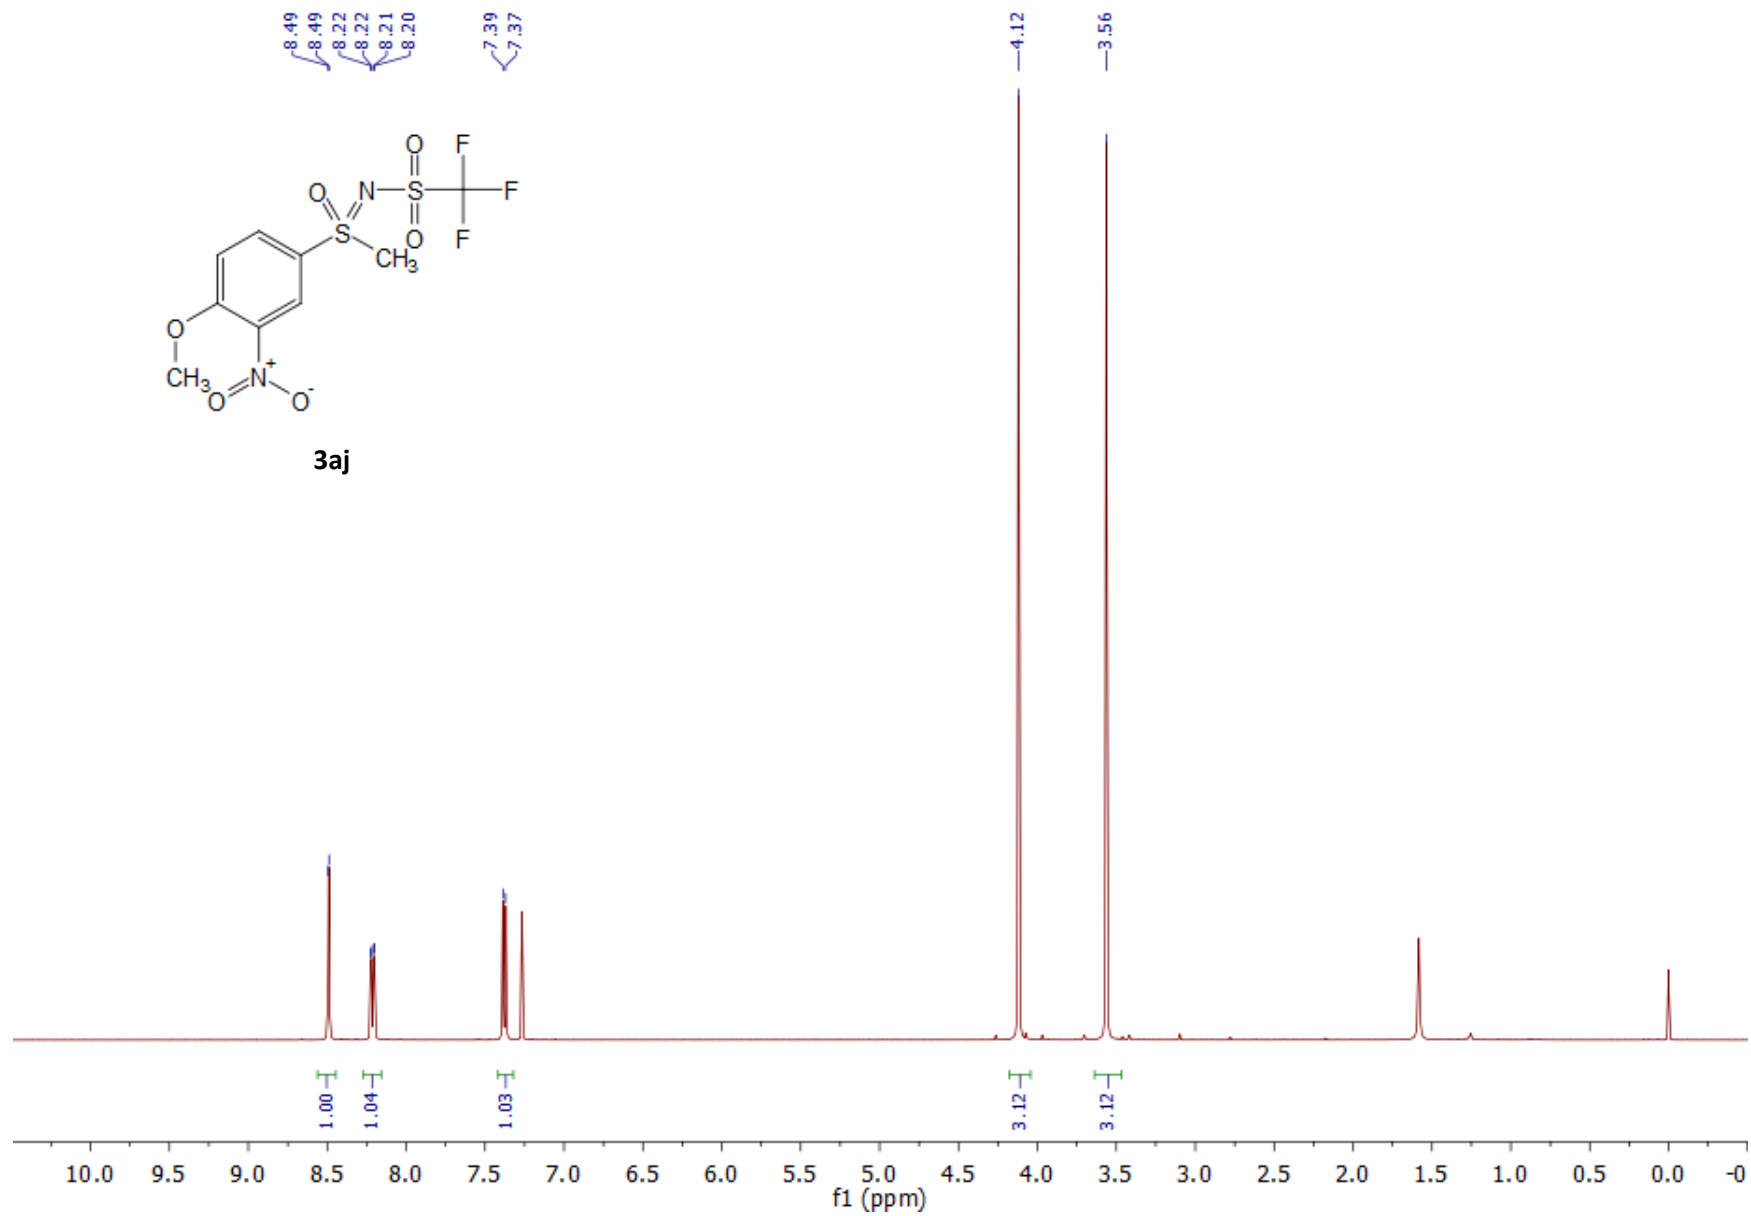

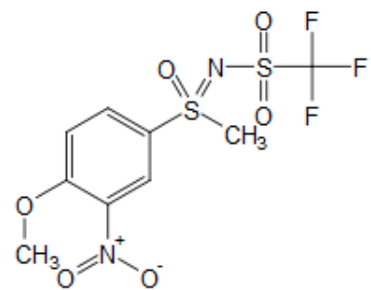

3aj

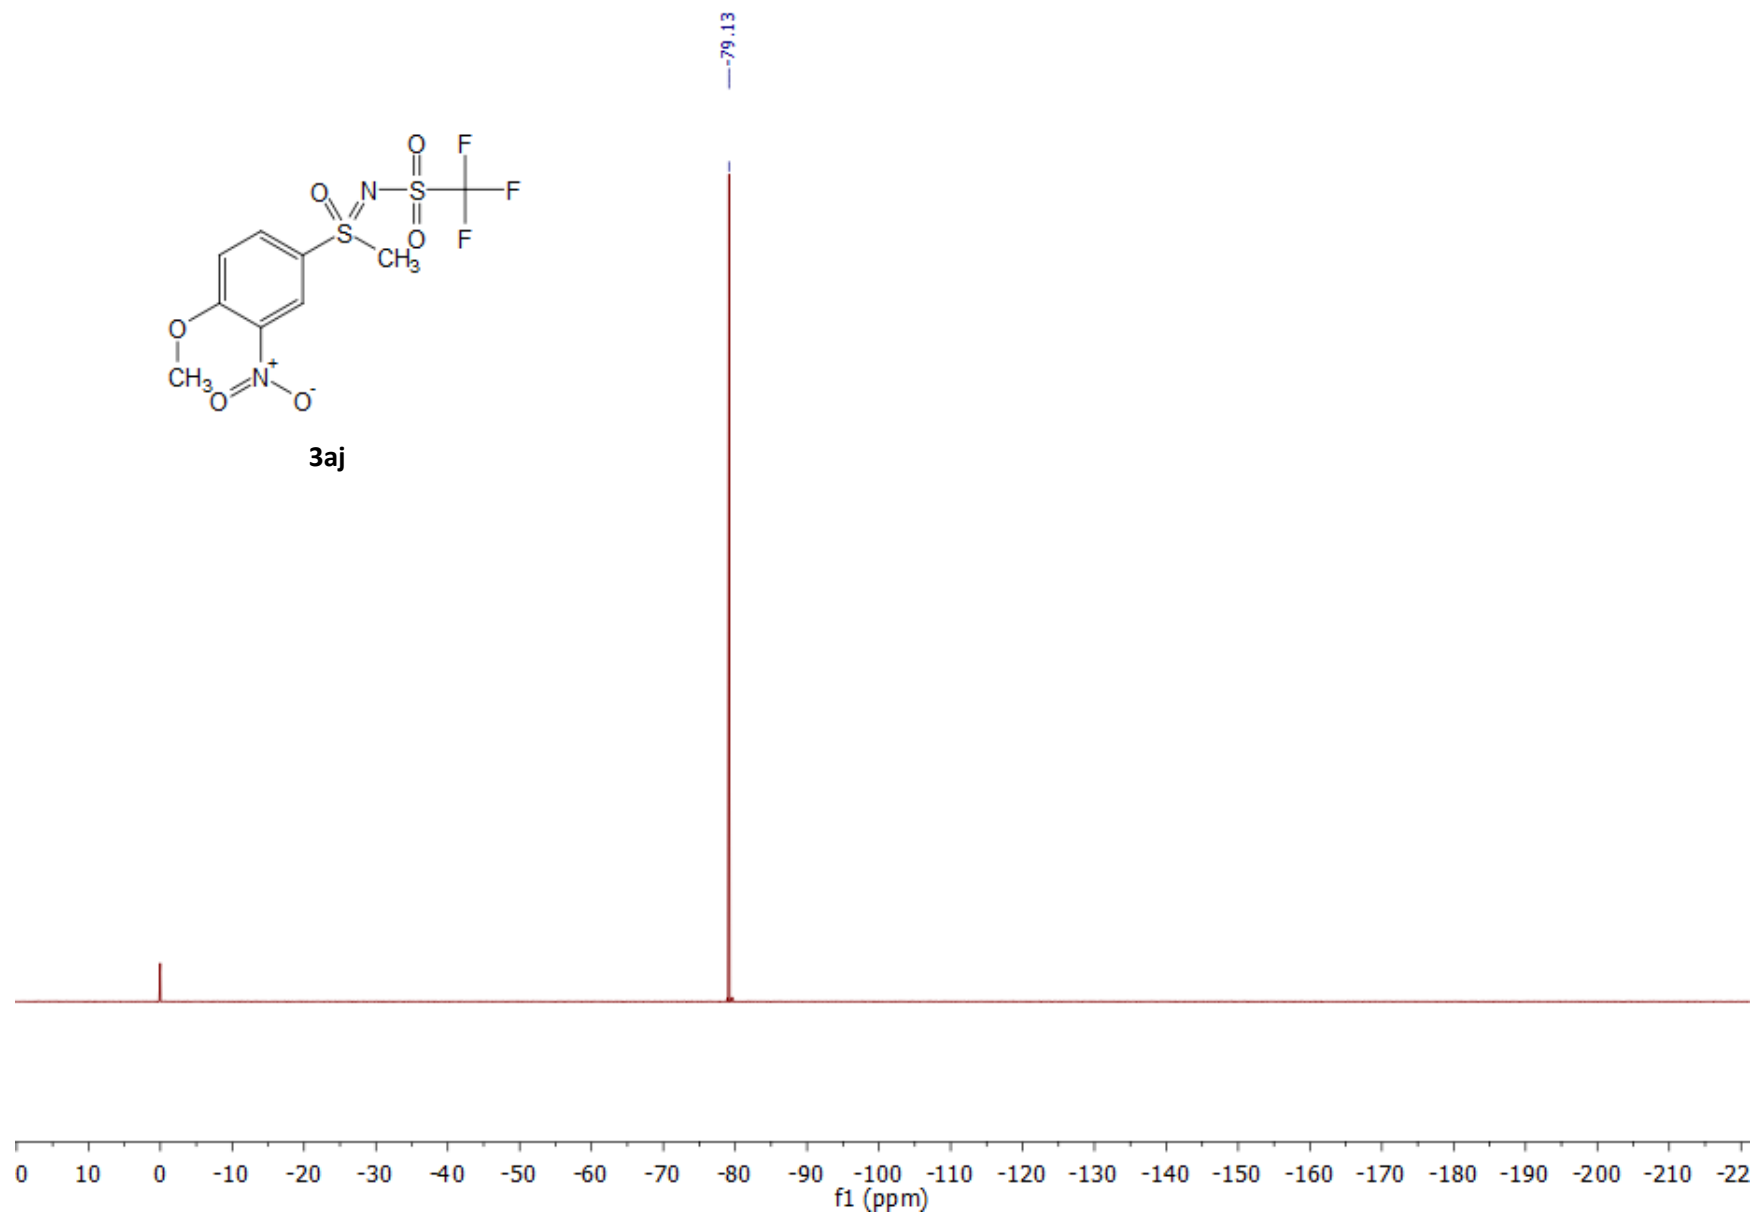



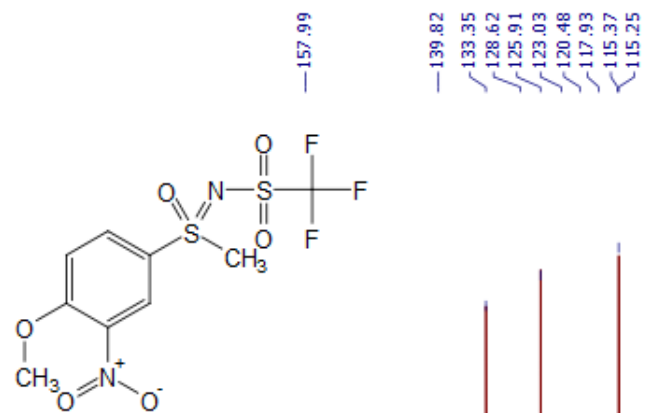

3aj

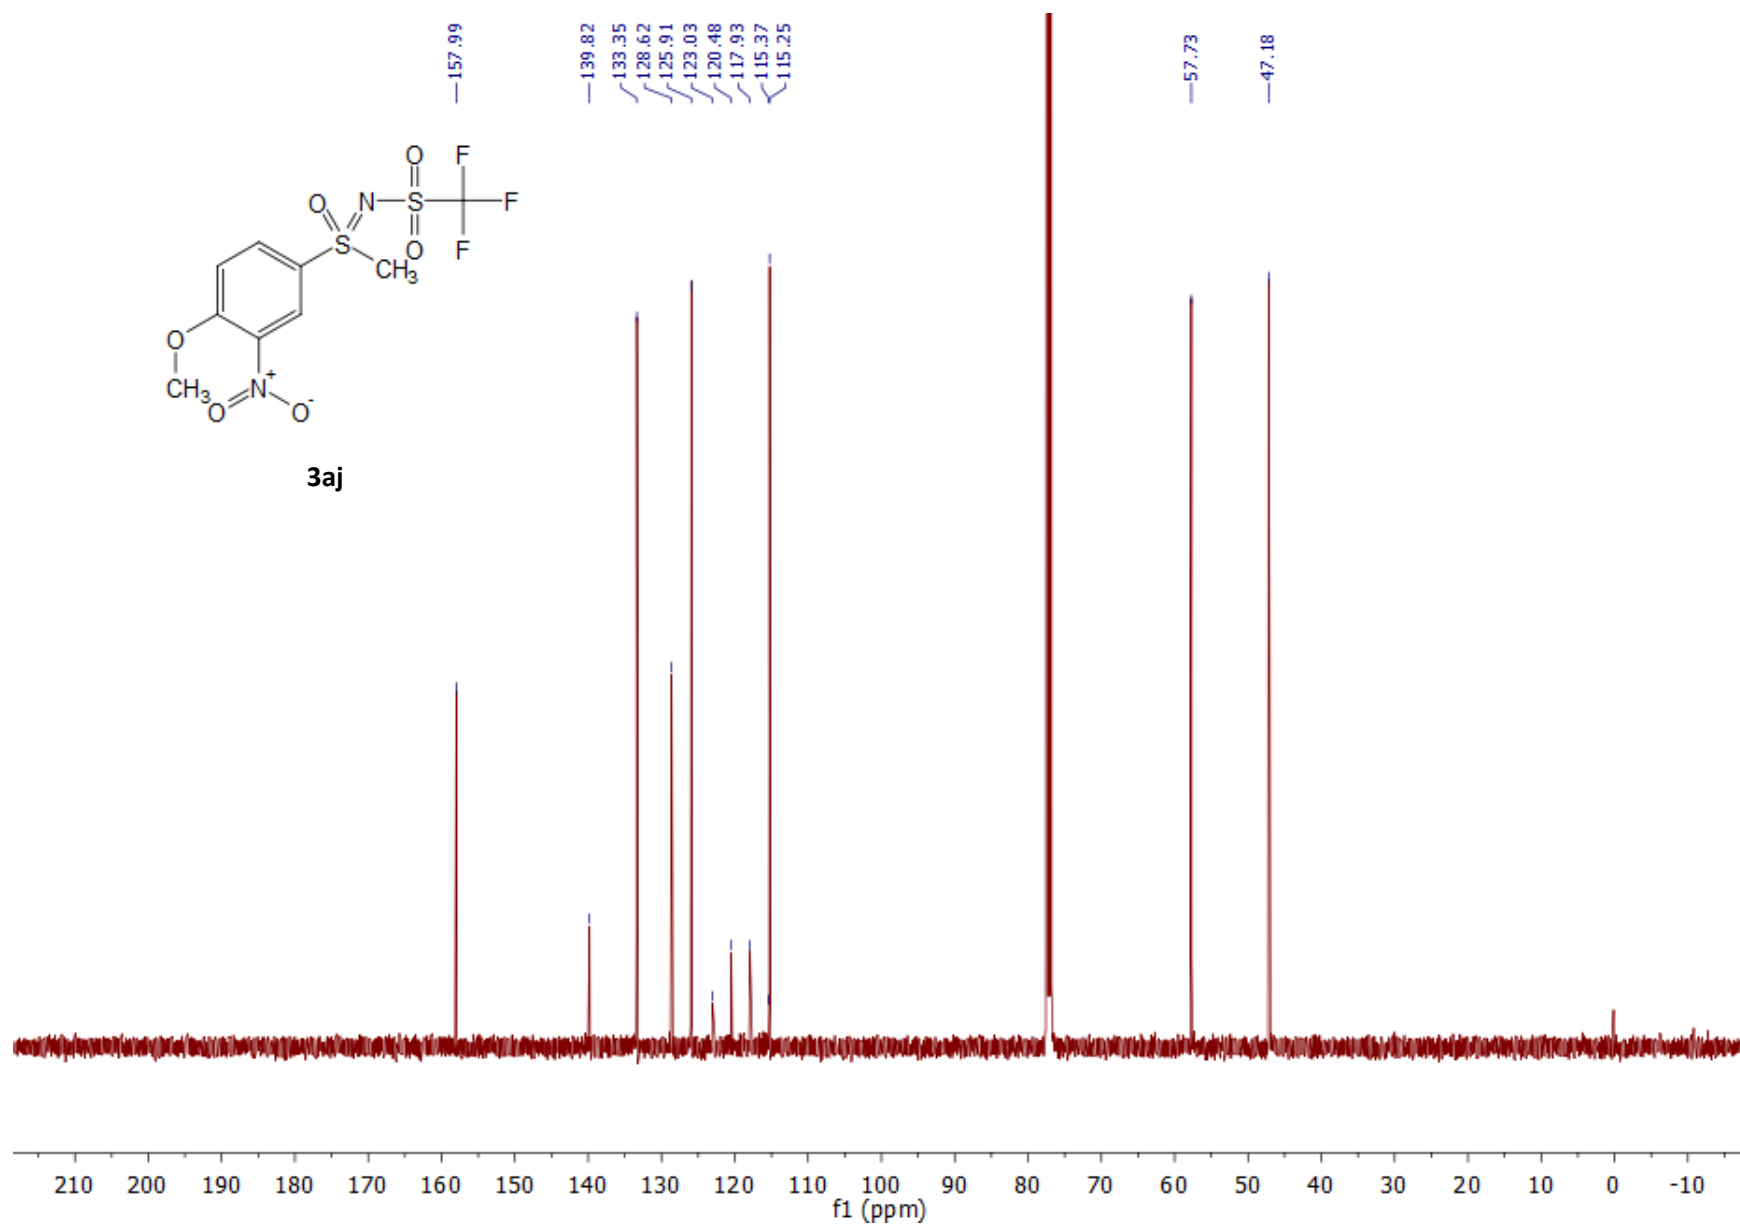

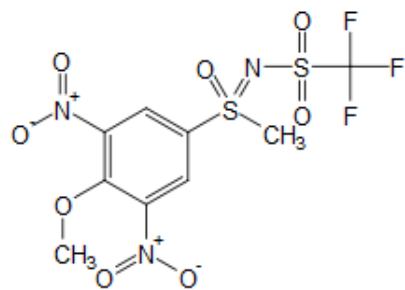

3ak

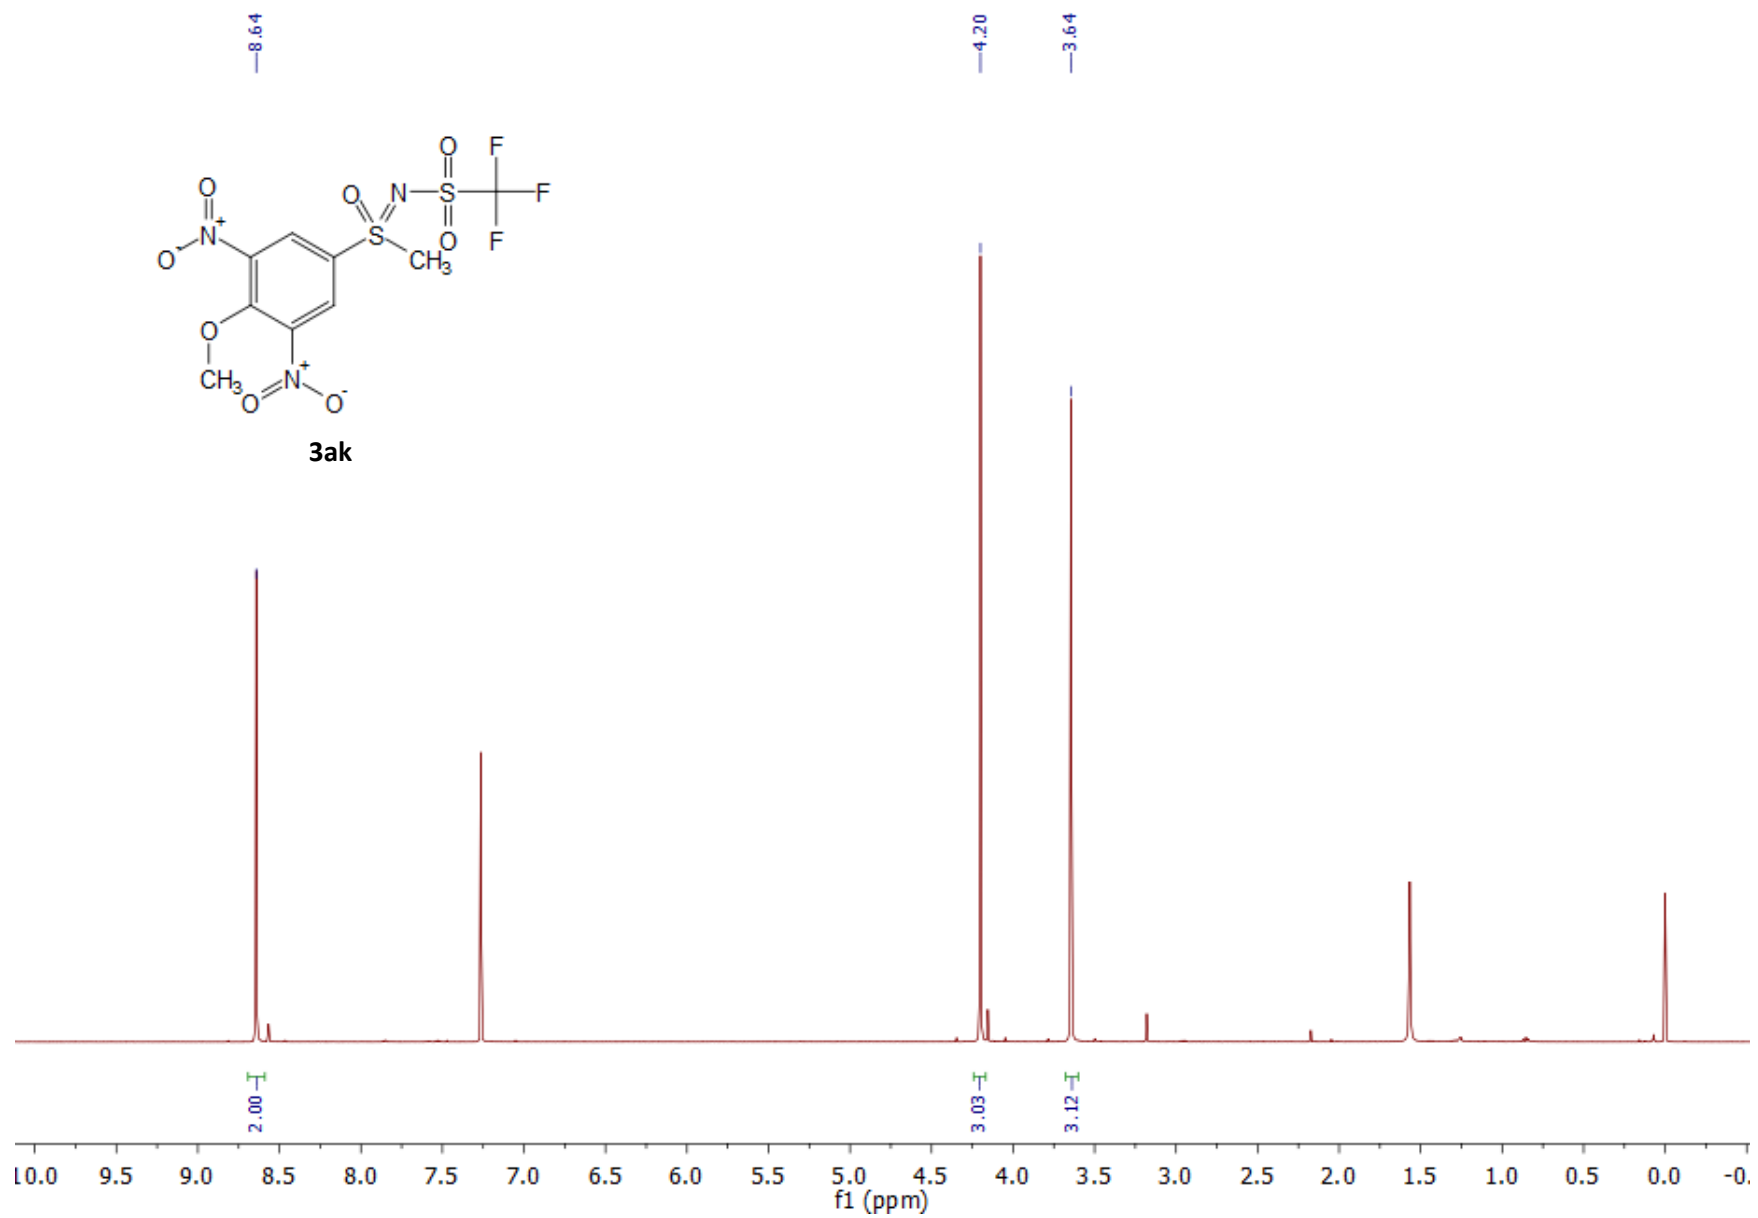



3ak

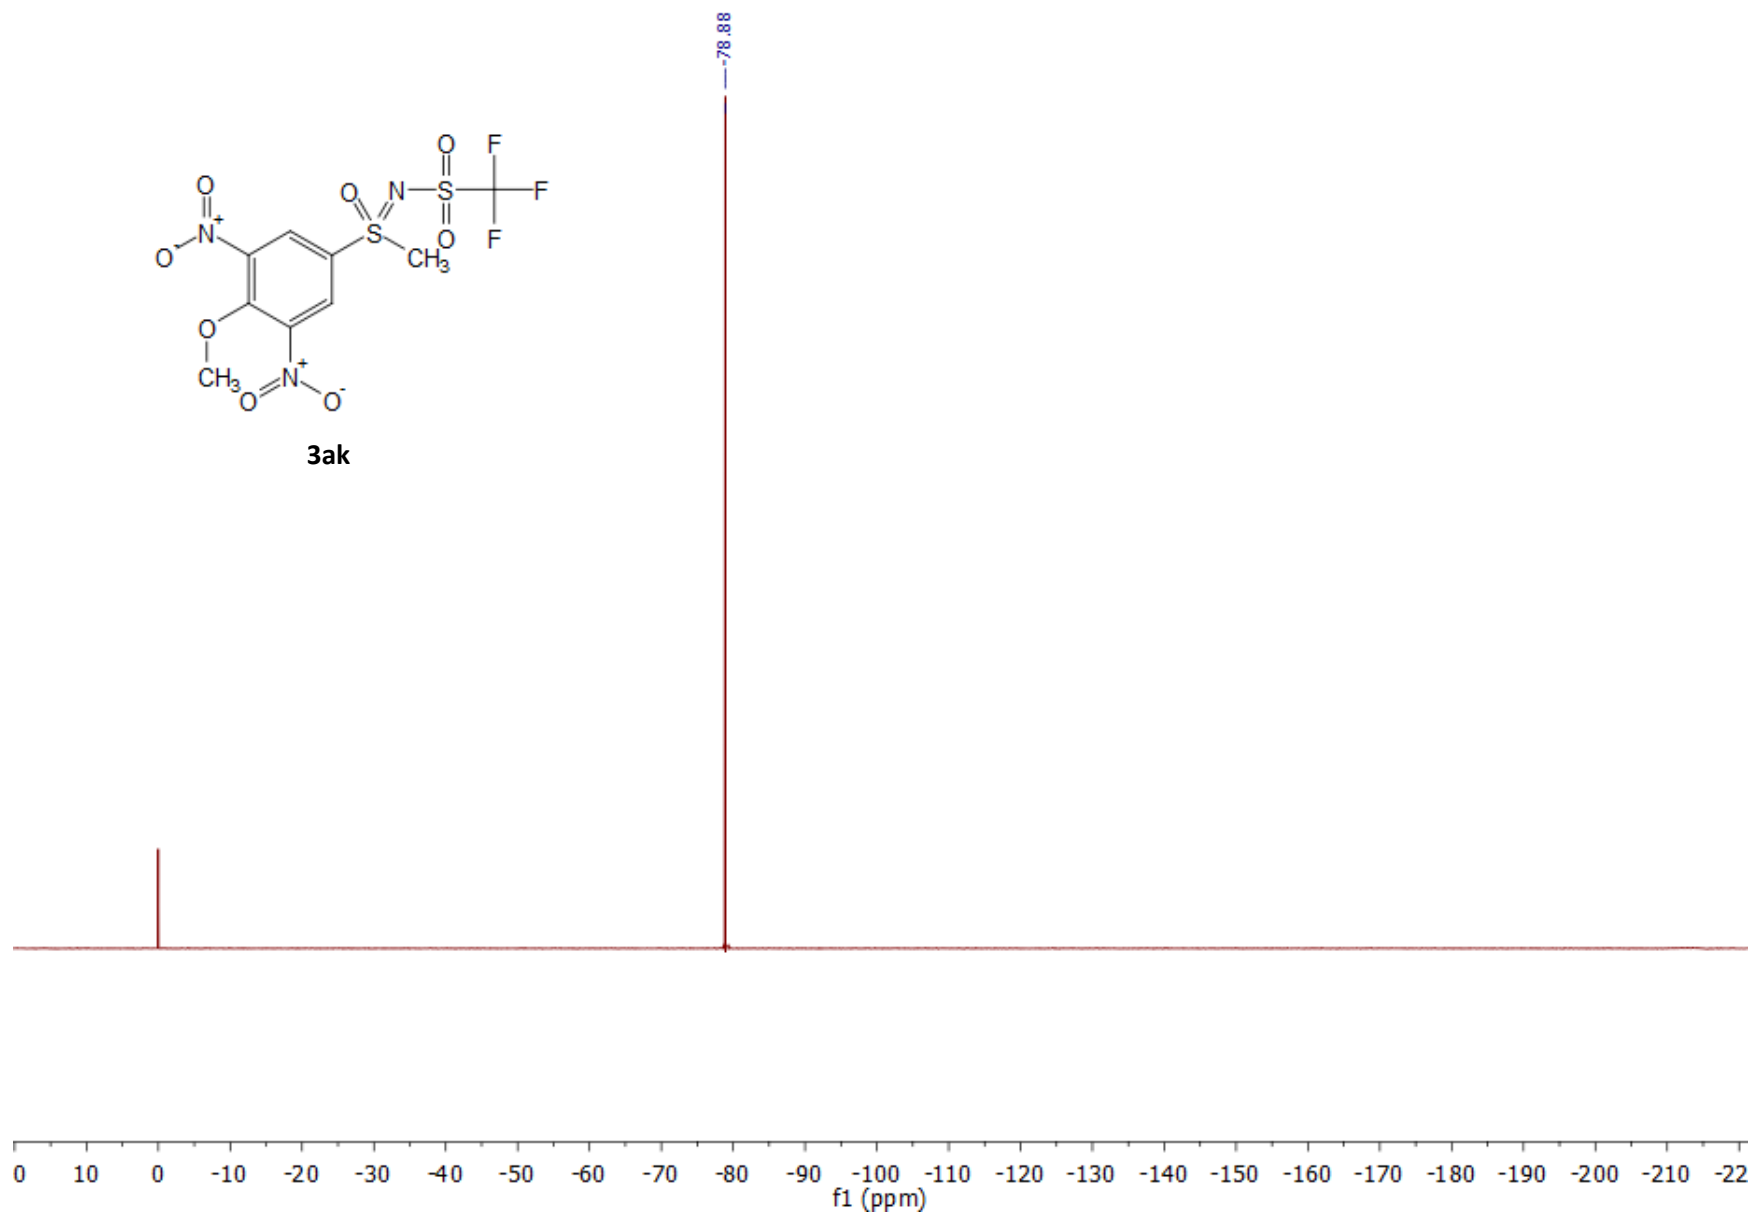

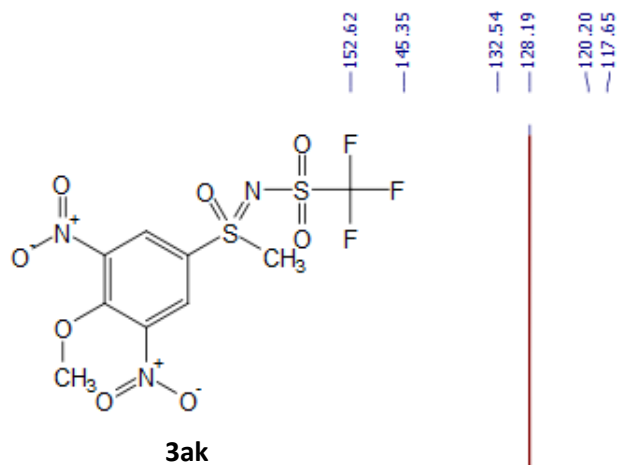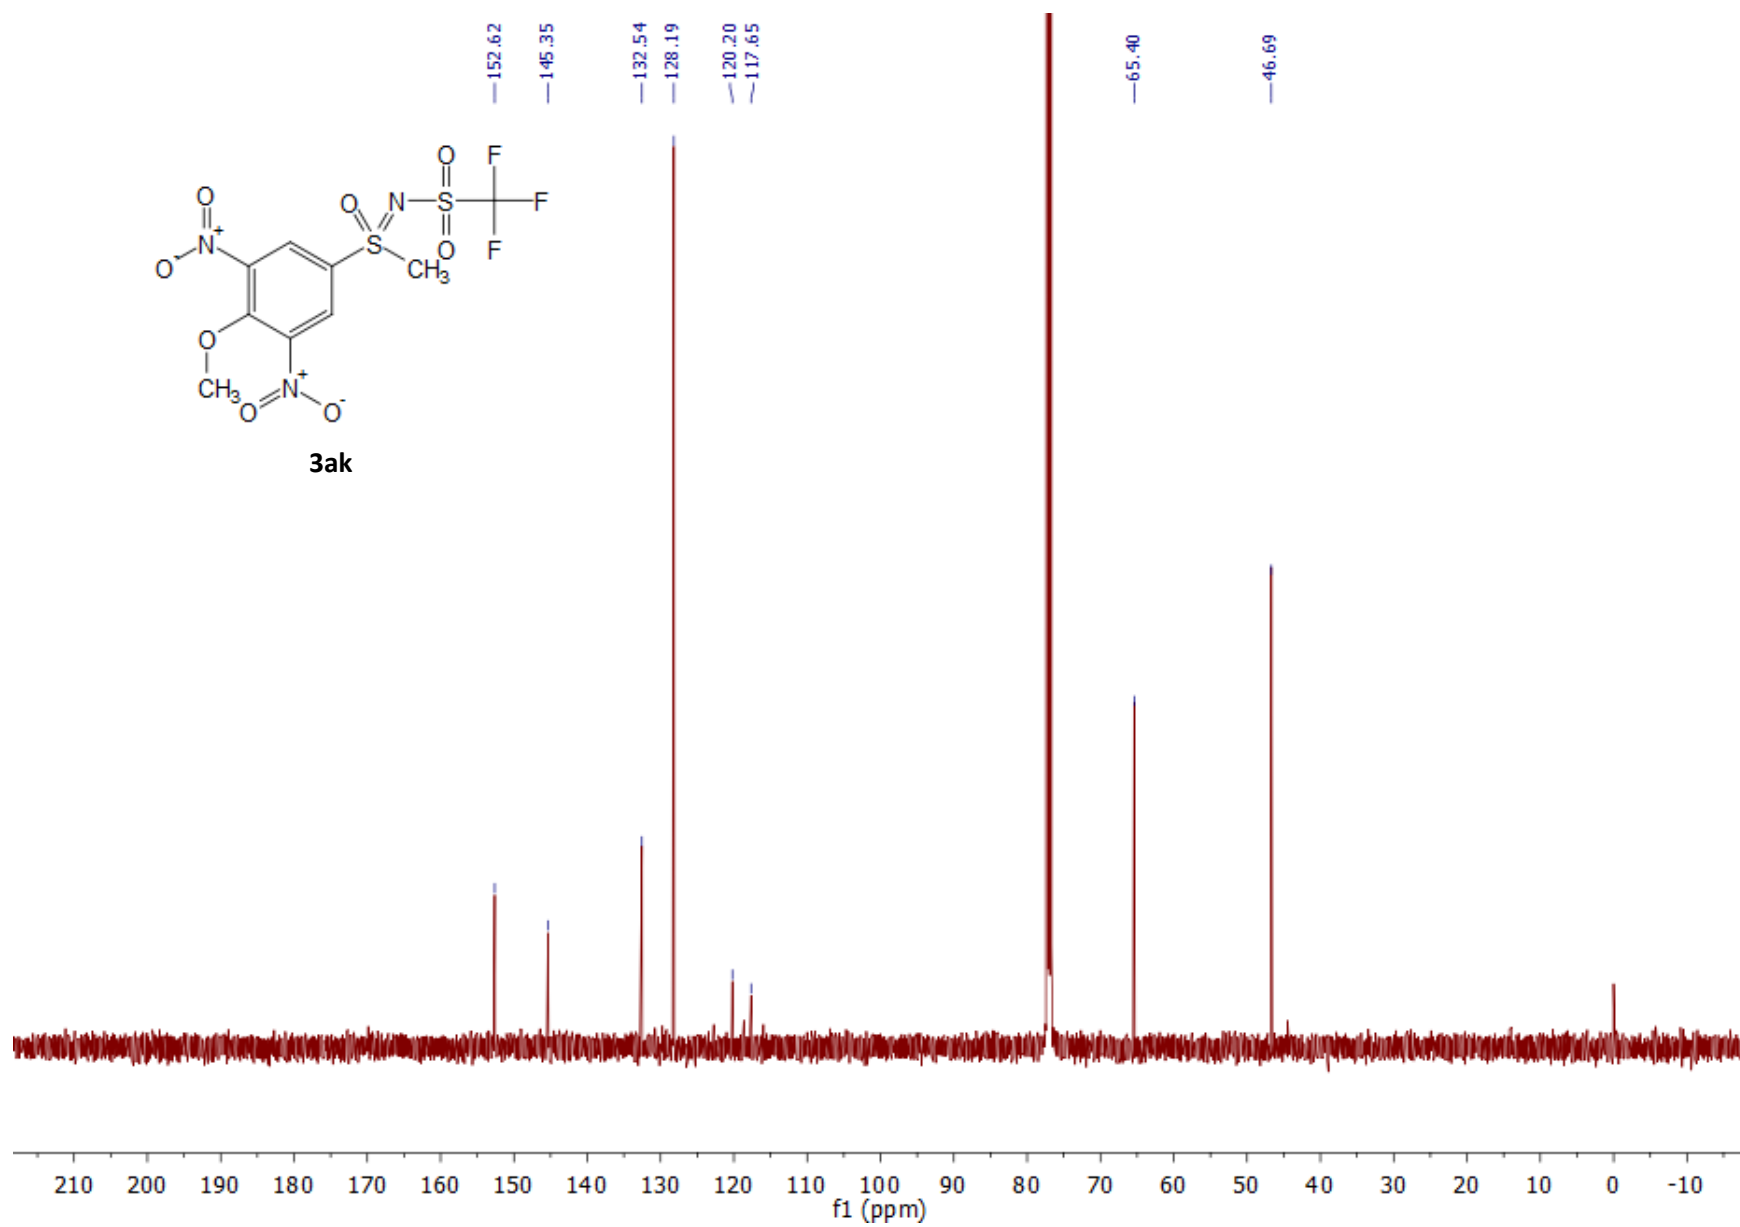

S132

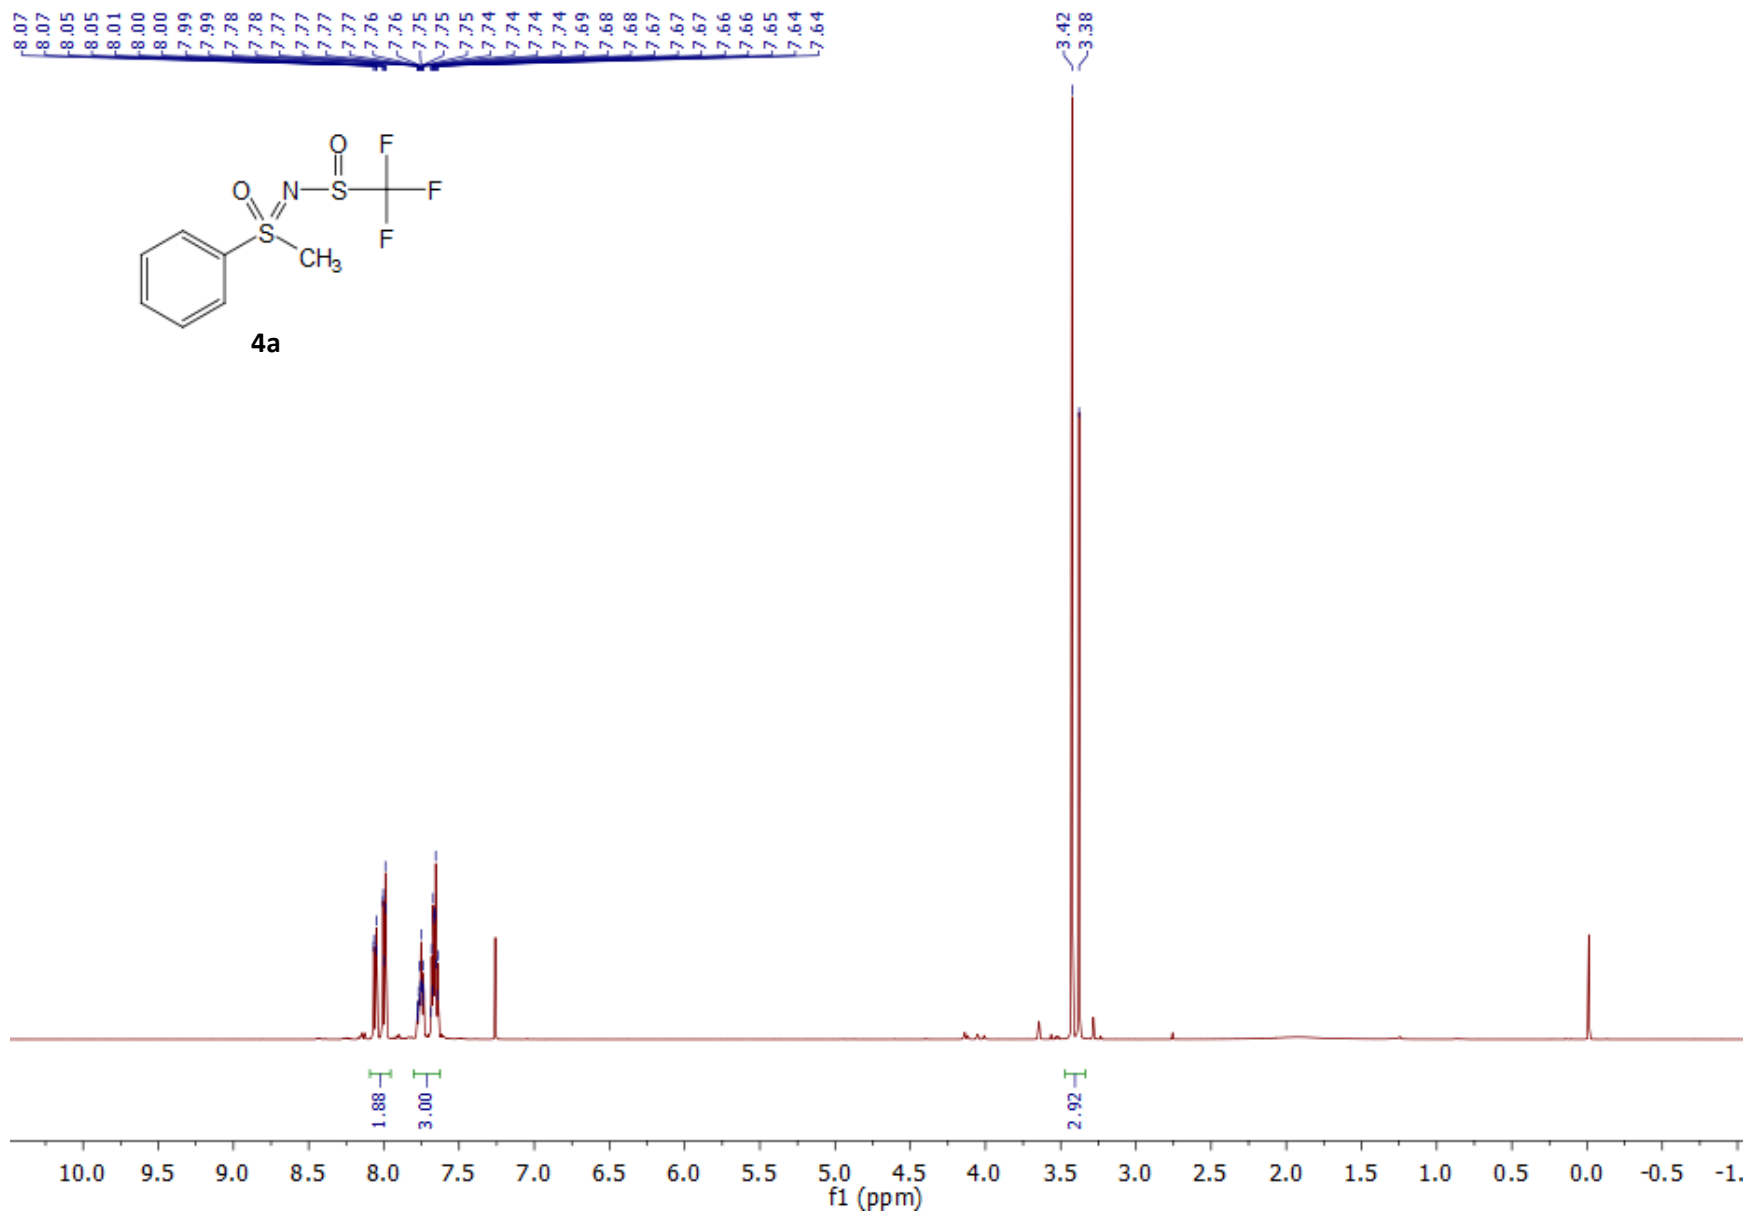

S133

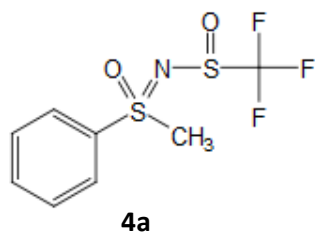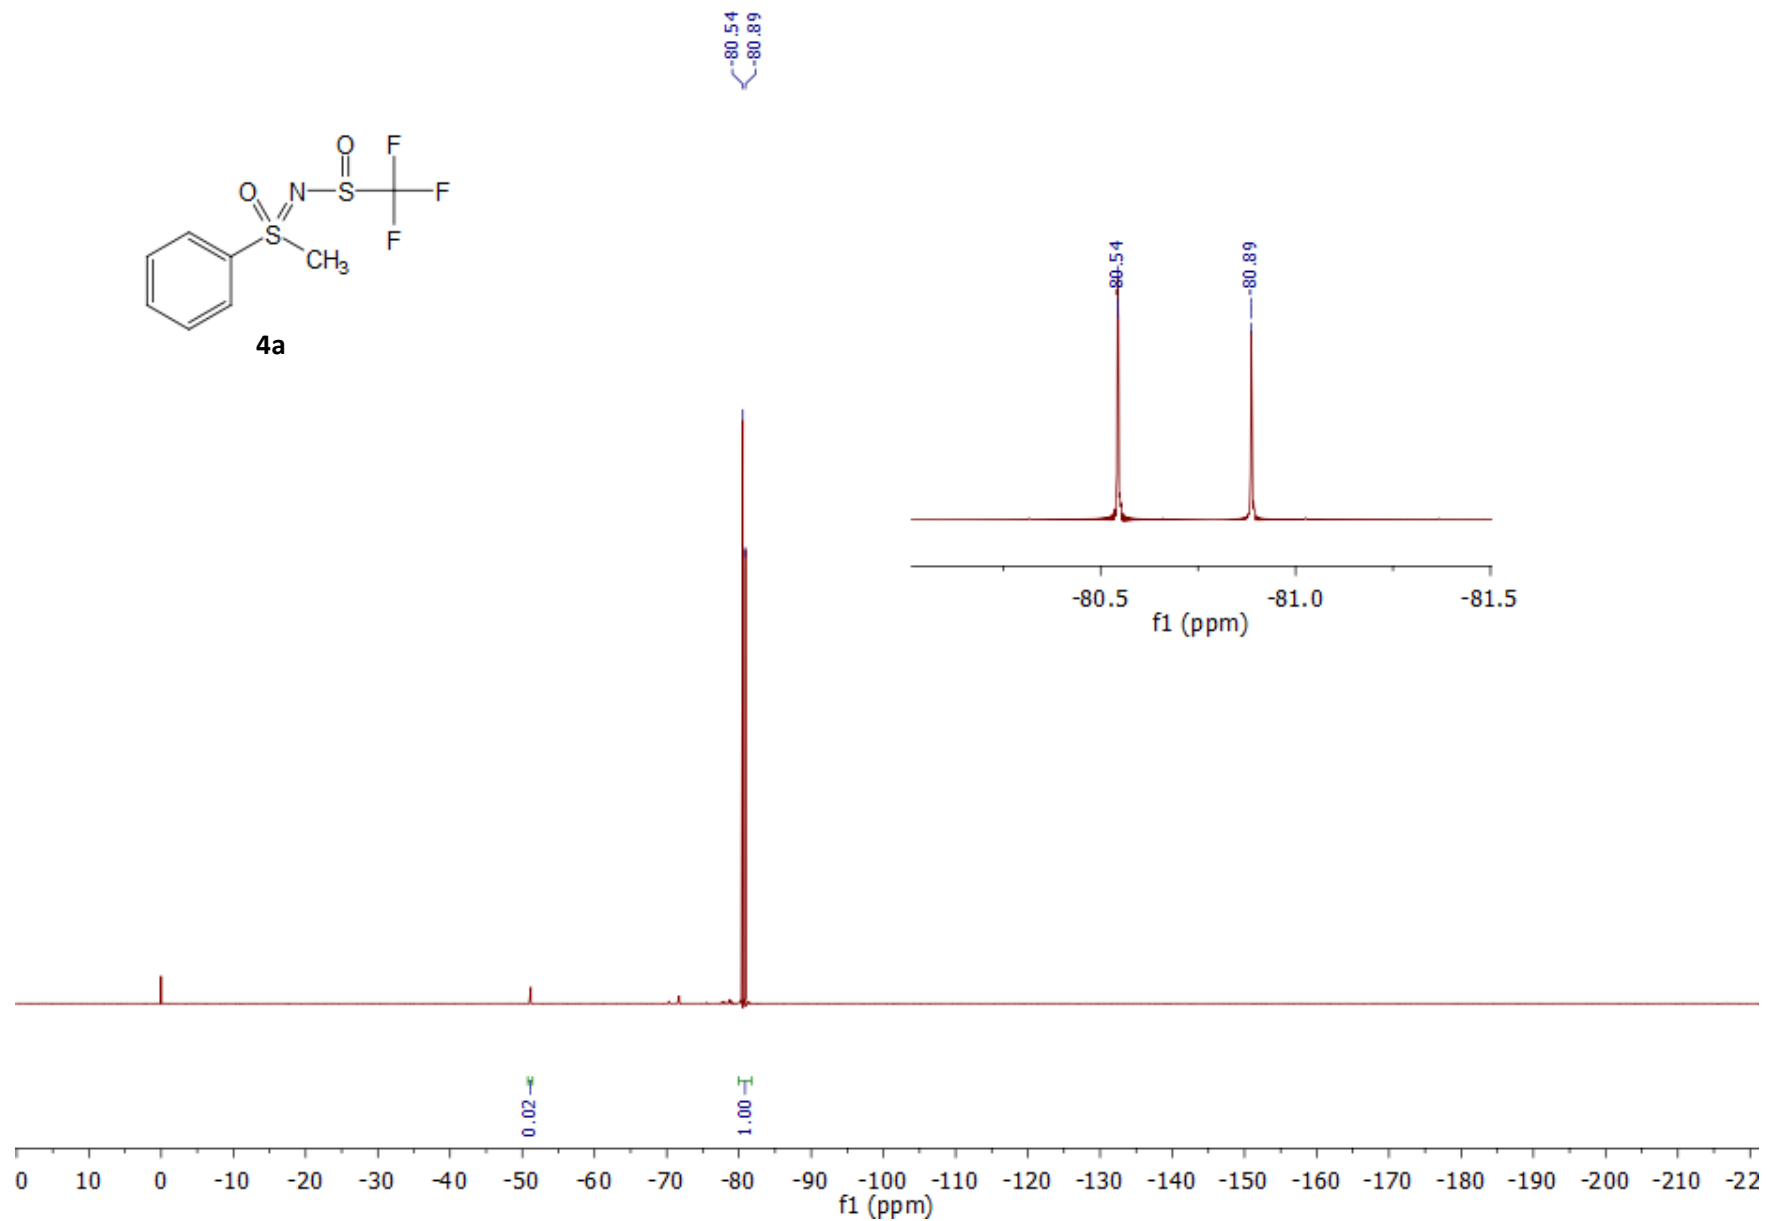

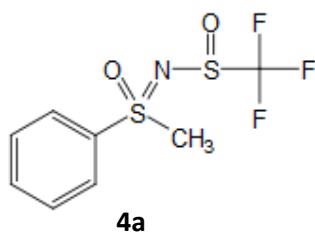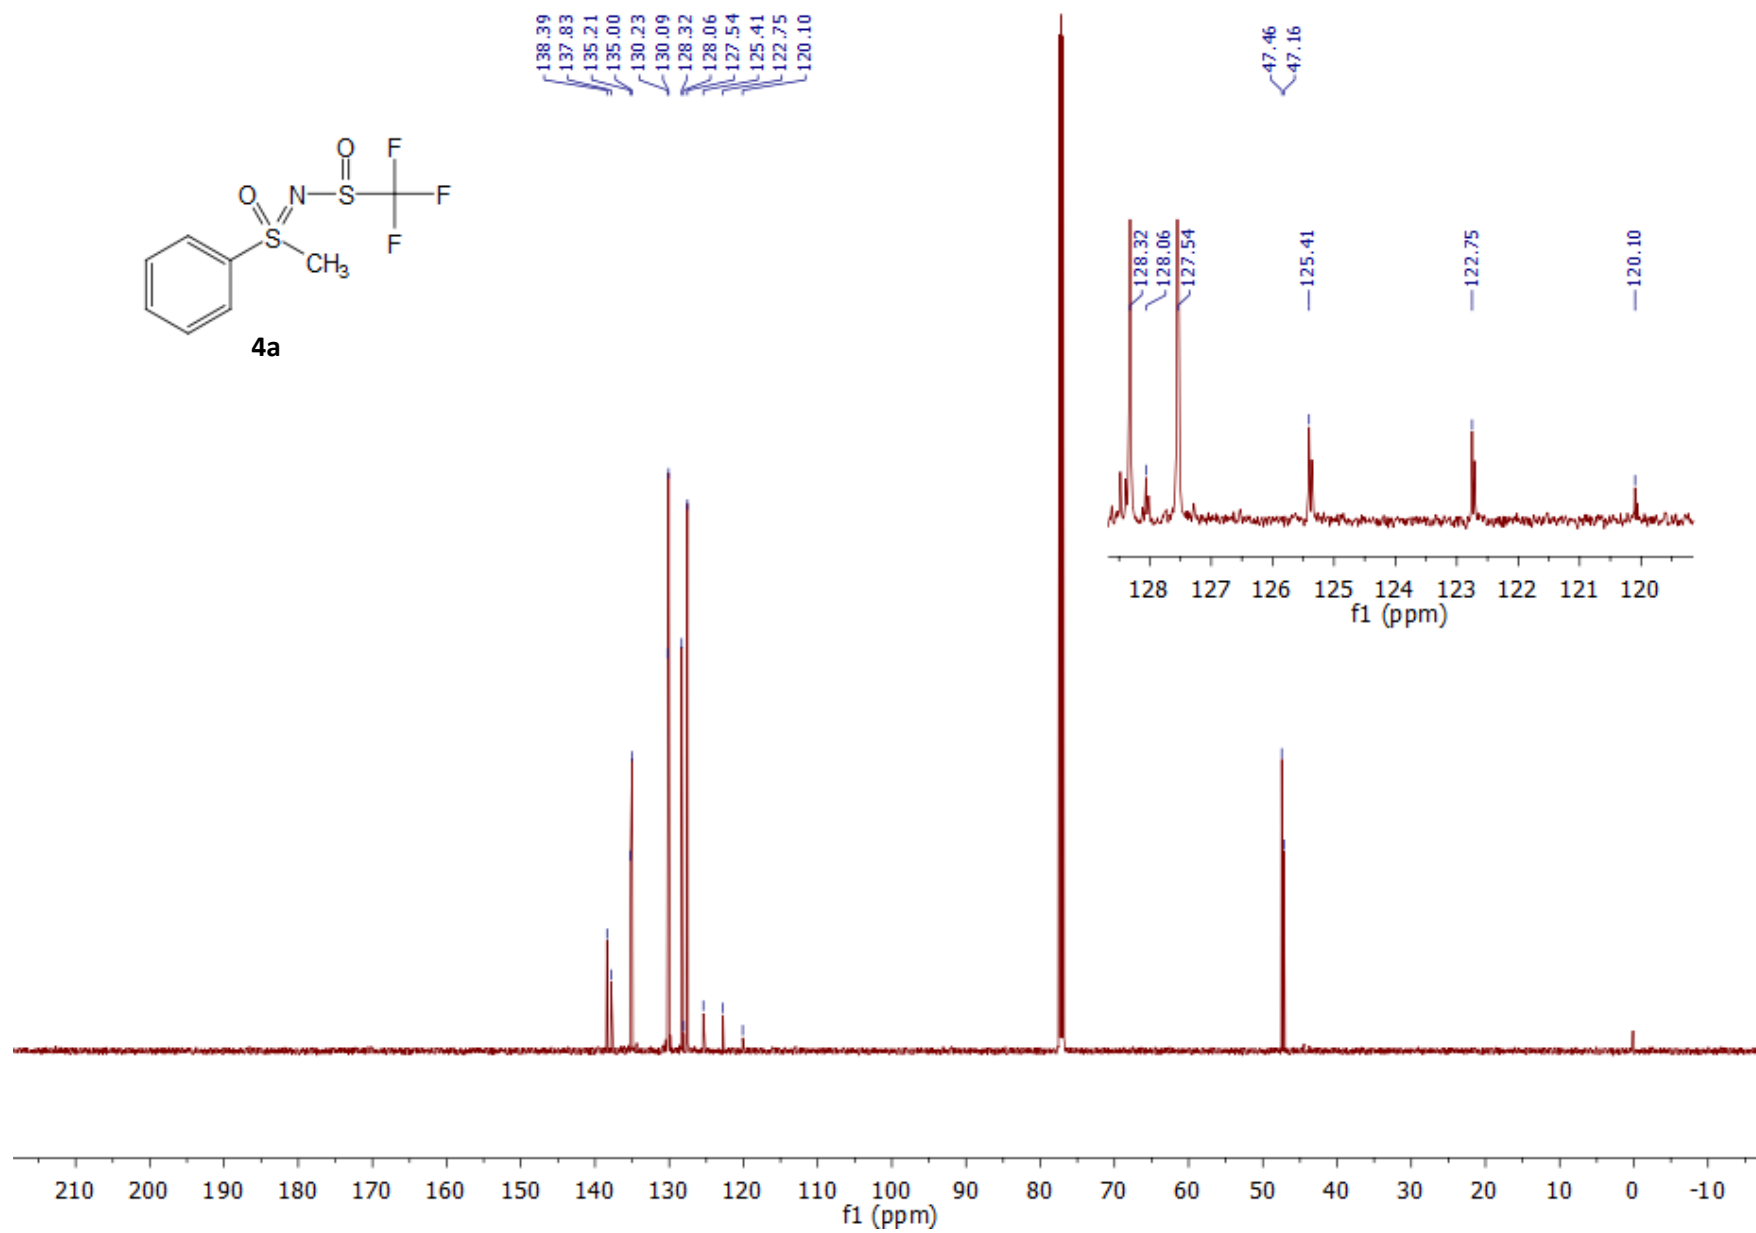

S135

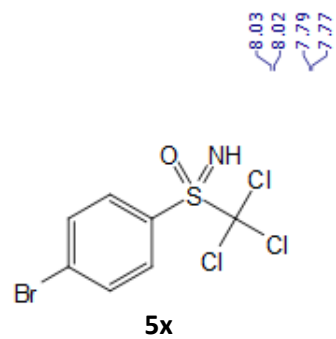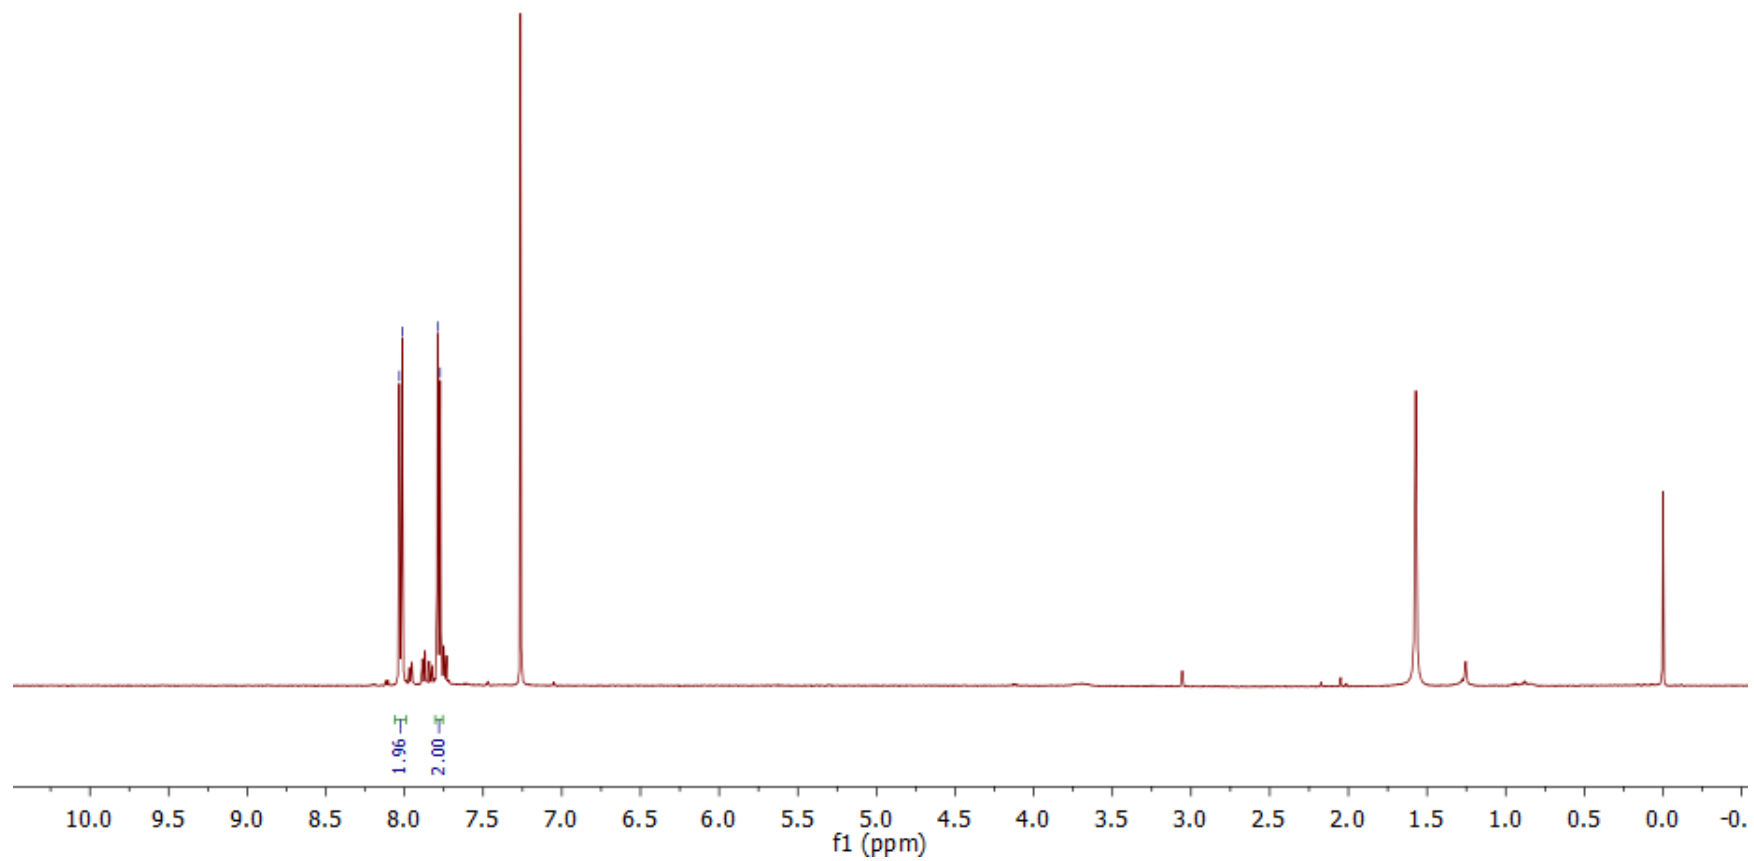

S136



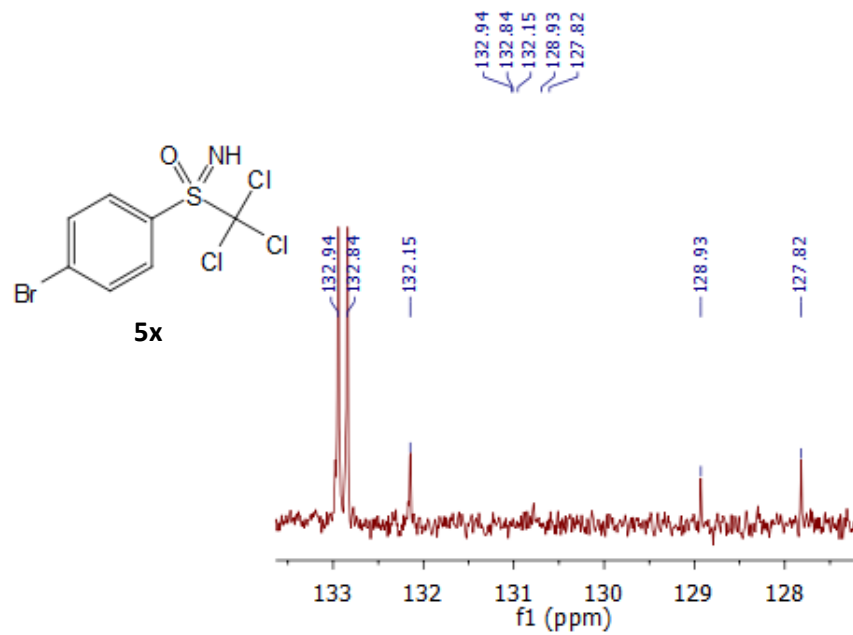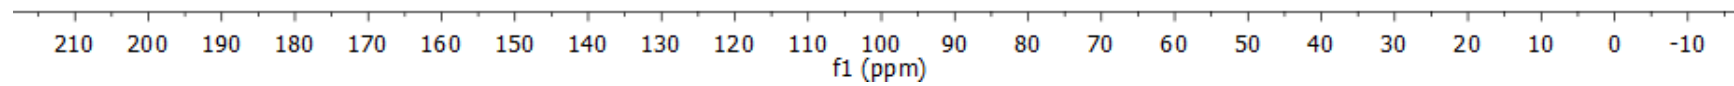

S137

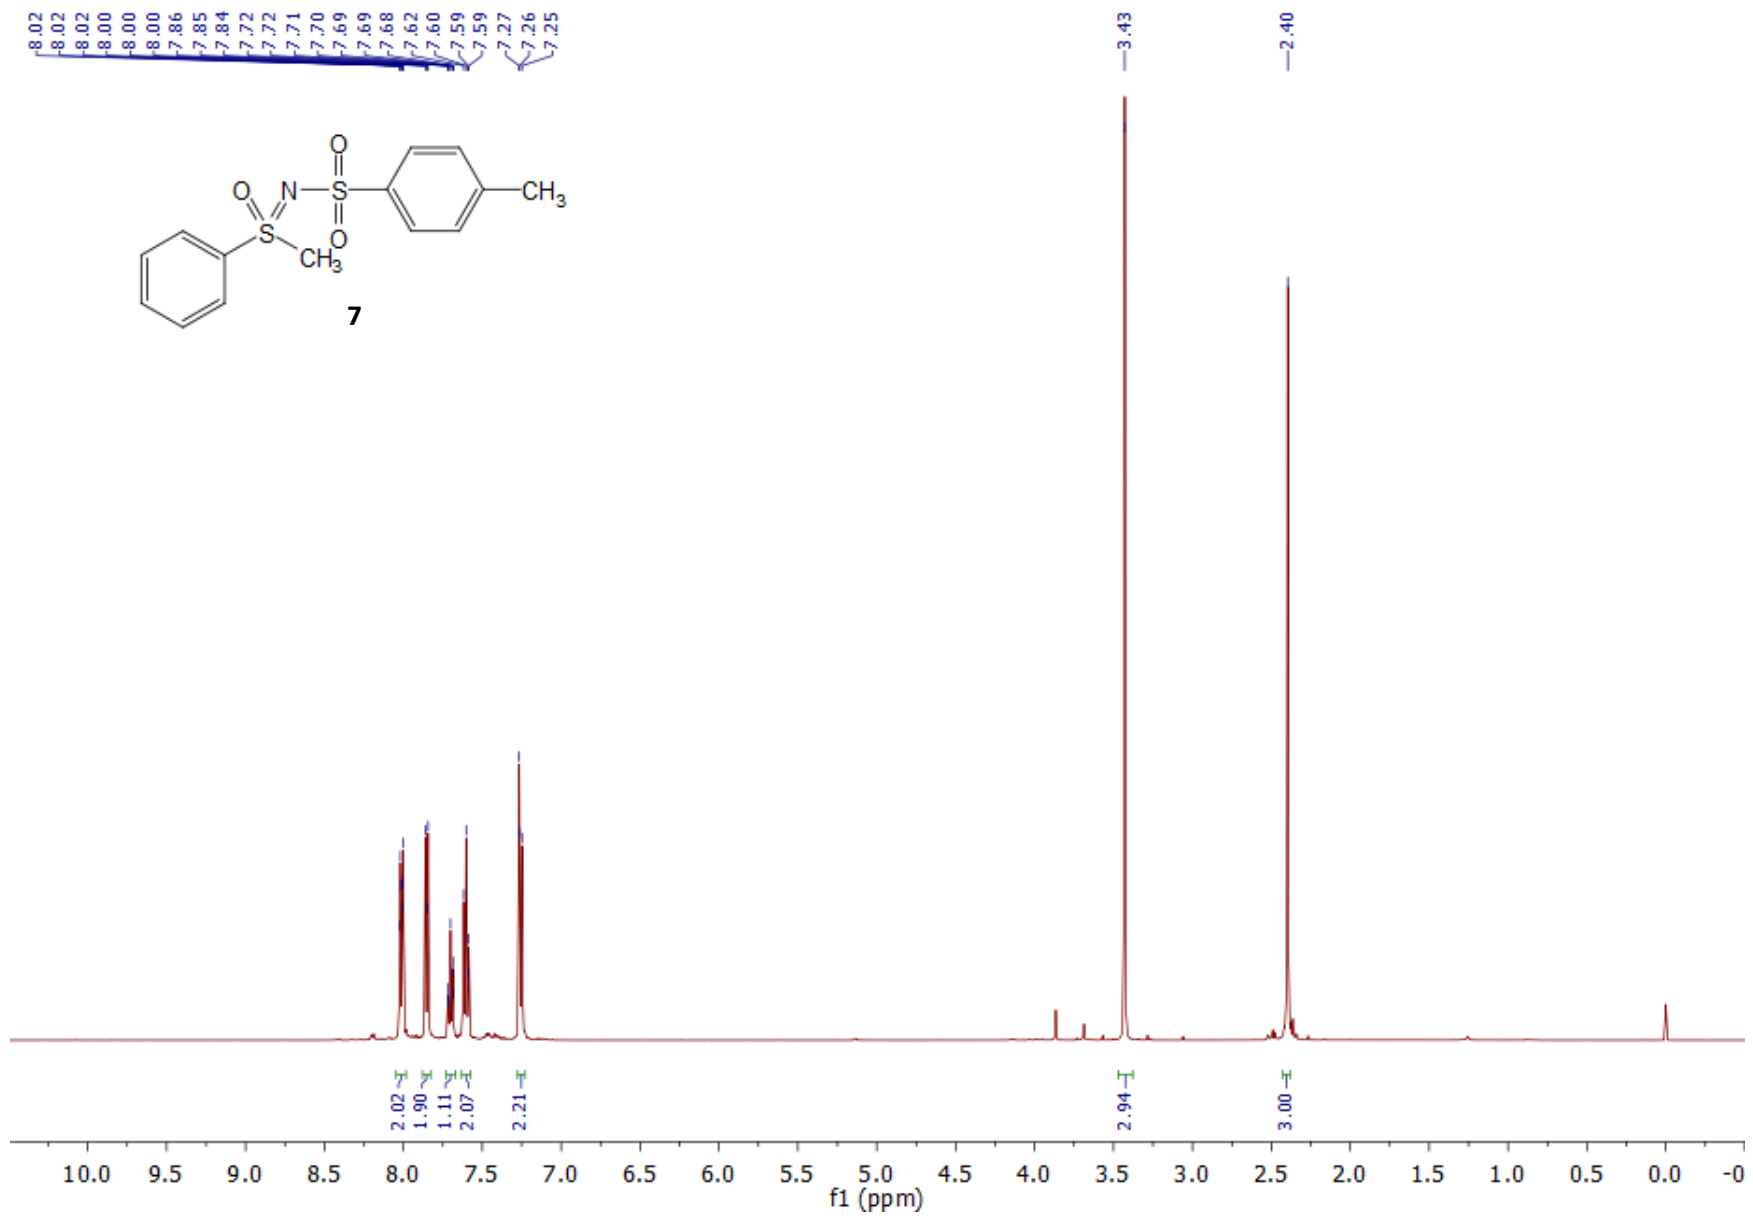

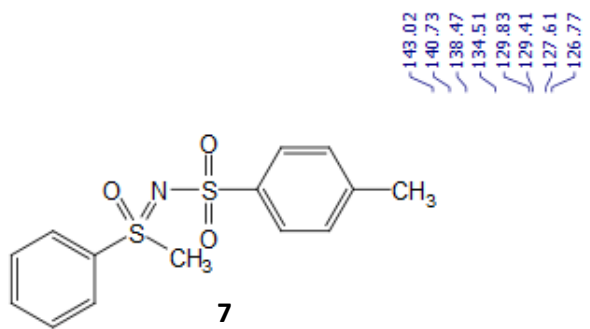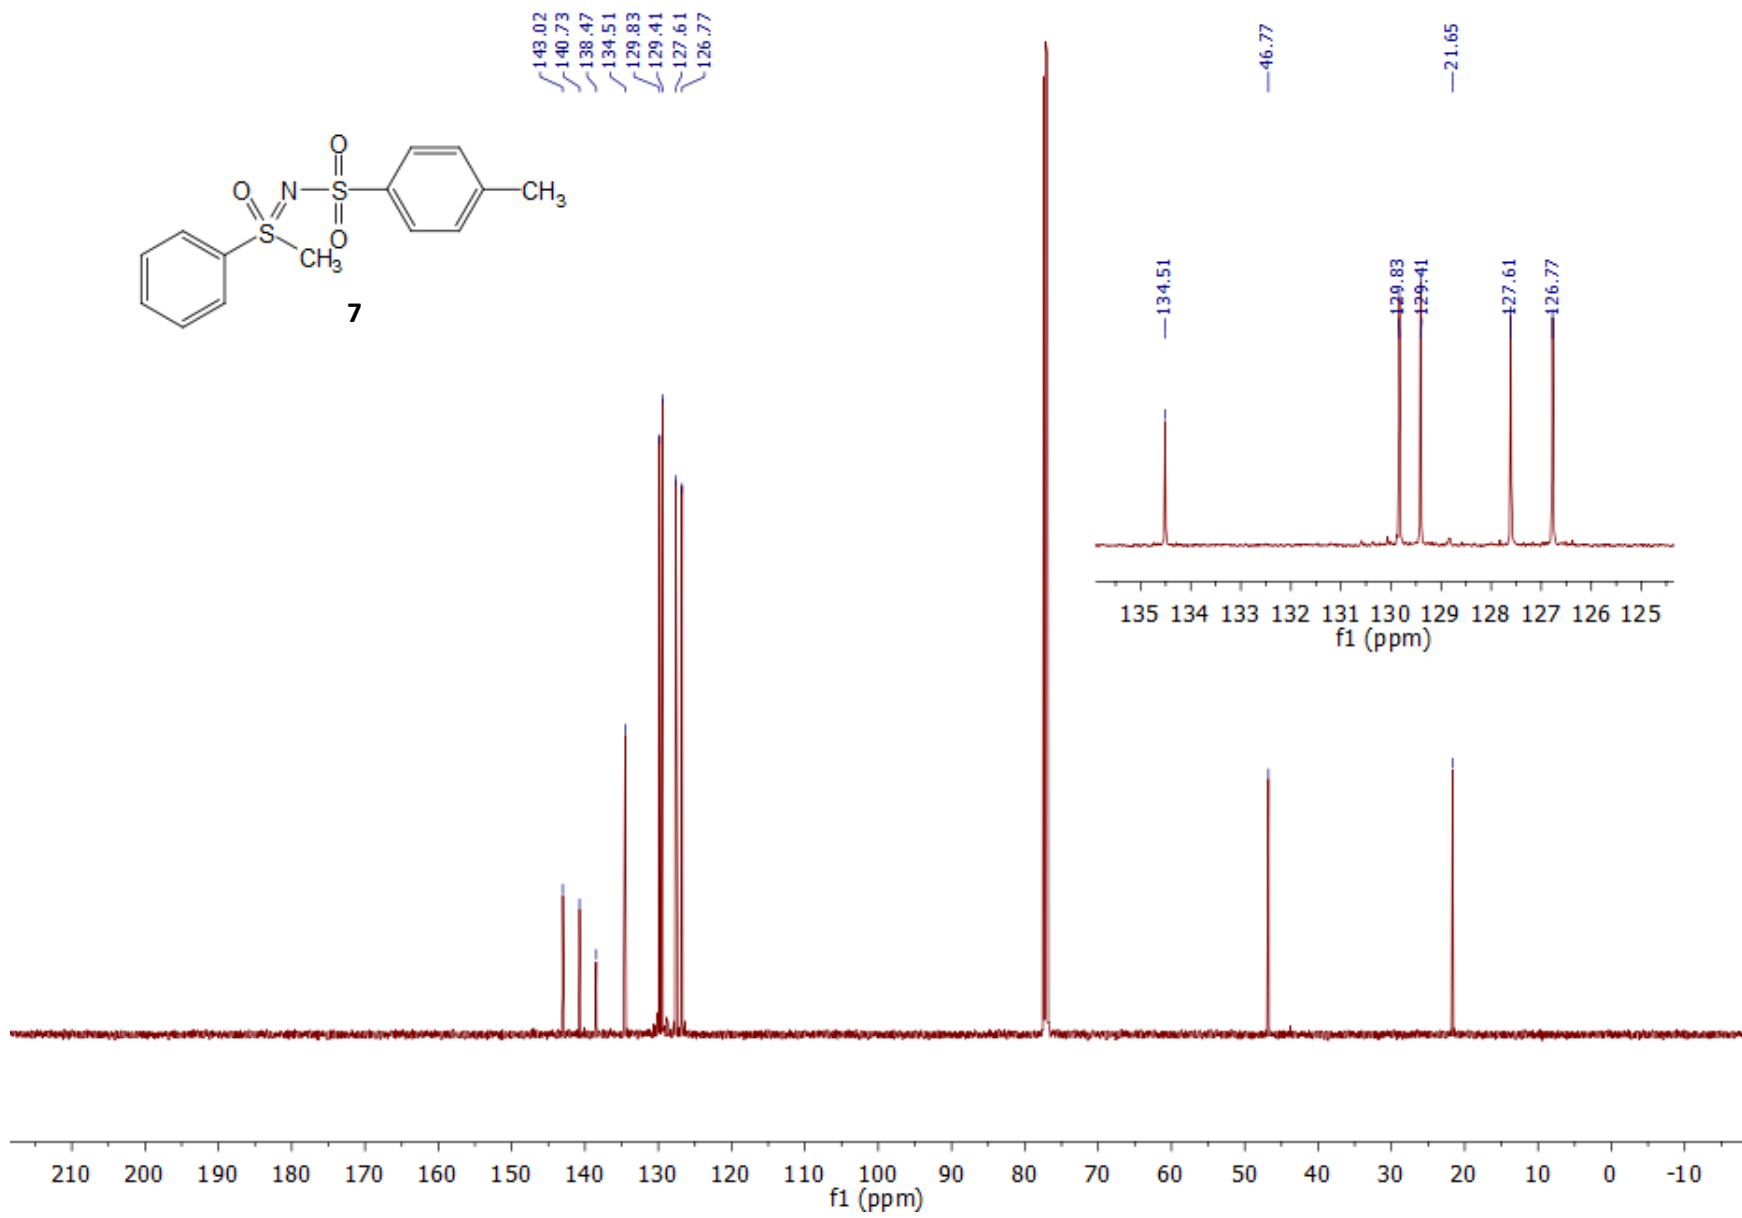

Supplement: d4ra04992f1.pdf [file d4ra04992f1.pdf]
